# Supplementary material for: Glycosylation of Methylflavonoids in the Cultures of Entomopathogenic Filamentous Fungi as a Tool for Obtaining New Biologically Active Compounds
Source: MDPI journal article supplement (doi:10.3390/ijms23105558), 2022-05-16
Supplement: s1 [file s1]

## Supplementary materials

# Glycosylation of methylflavonoids in the cultures of entomopathogenic filamentous fungi as a tool for obtaining new biologically active compounds

Agnieszka Krawczyk-Łebek\*, Monika Dymarska, Tomasz Janeczko and Edyta Kostrzewa-Susłow\*

Department of Food Chemistry and Biocatalysis, Faculty of Biotechnology and Food Science, Wrocław University of Environmental and Life Sciences, Wrocław, Poland

\*Correspondence: [agnieszka.krawczyk-lebek@upwr.edu.pl](mailto:agnieszka.krawczyk-lebek@upwr.edu.pl), [edyta.kostrzewa-suslow@upwr.edu.pl](mailto:edyta.kostrzewa-suslow@upwr.edu.pl)

### Content

- Figure S1.** MS analysis of 2'-hydroxy-4-methylchalcone (3)
- Figure S2.**  $^1\text{H}$  NMR spectrum ( $\delta$ , acetone- $d_6$ , 600 MHz) of 2'-hydroxy-4-methylchalcone (3)
- Figure S3.**  $^1\text{H}$  NMR spectrum expansion ( $\delta$ , acetone- $d_6$ , 600 MHz) of 2'-hydroxy-4-methylchalcone (3)
- Figure S4.**  $^{13}\text{C}$  NMR spectrum ( $\delta$ , acetone- $d_6$ , 151 MHz) of 2'-hydroxy-4-methylchalcone (3)
- Figure S5.**  $^{13}\text{C}$  NMR spectrum expansion ( $\delta$ , acetone- $d_6$ , 151 MHz) of 2'-hydroxy-4-methylchalcone (3)
- Figure S6.** COSY contour map –  $^1\text{H} \times ^1\text{H}$  of 2'-hydroxy-4-methylchalcone (3)
- Figure S7.** COSY contour map –  $^1\text{H} \times ^1\text{H}$  expansion of 2'-hydroxy-4-methylchalcone (3)
- Figure S8.** COSY contour map –  $^1\text{H} \times ^1\text{H}$  expansion of 2'-hydroxy-4-methylchalcone (3)
- Figure S9.** HSQC contour map –  $^1\text{H} \times ^{13}\text{C}$  of 2'-hydroxy-4-methylchalcone (3)
- Figure S10.** HSQC contour map –  $^1\text{H} \times ^{13}\text{C}$  expansion of 2'-hydroxy-4-methylchalcone (3)
- Figure S11.** HSQC contour map –  $^1\text{H} \times ^{13}\text{C}$  expansion of 2'-hydroxy-4-methylchalcone (3)
- Figure S12.** HMBC contour map –  $^1\text{H} \times ^{13}\text{C}$  of 2'-hydroxy-4-methylchalcone (3)
- Figure S13.** HMBC contour map –  $^1\text{H} \times ^{13}\text{C}$  expansion of 2'-hydroxy-4-methylchalcone (3)
- Figure S14.** HMBC contour map –  $^1\text{H} \times ^{13}\text{C}$  expansion of 2'-hydroxy-4-methylchalcone (3)
- Figure S15.** HMBC contour map –  $^1\text{H} \times ^{13}\text{C}$  expansion of 2'-hydroxy-4-methylchalcone (3)
- Figure S16.** 2'-Hydroxy-4-methylchalcone (3) physicochemical and ADME parameters prediction using the SwissADME modelling
- Figure S17.** 2'-Hydroxy-4-methylchalcone (3) physicochemical biological activity prediction using the Way2Drug Pass online modelling
- Figure S18.** 2'-Hydroxy-4-methylchalcone (3) antibacterial activity prediction using the Way2Drug AntiBac-Pred modelling
- Figure S19.** 2'-Hydroxy-4-methylchalcone (3) antifungal activity prediction using the Way2Drug AntiFun-Pred modelling
- Figure S20.** 2'-Hydroxy-4-methylchalcone (3) antiviral activity prediction using the Way2Drug AntiVir-Pred modelling
- Figure S21.** MS analysis 2'-hydroxy-4-methyldihydrochalcone 5'-O- $\beta$ -D-(4''-O-methyl)-glucopyranoside (3a)

**Figure S22.**  $^1\text{H}$  NMR spectrum ( $\delta$ , acetone- $d_6$ , 600 MHz) of 2'-hydroxy-4-methyldihydrochalcone 5'- $O$ - $\beta$ -D-(4''- $O$ -methyl)-glucopyranoside (**3a**)

**Figure S23.**  $^1\text{H}$  NMR spectrum expansion ( $\delta$ , acetone- $d_6$ , 600 MHz) of 2'-hydroxy-4-methyldihydrochalcone 5'- $O$ - $\beta$ -D-(4''- $O$ -methyl)-glucopyranoside (**3a**)

**Figure S24.**  $^1\text{H}$  NMR spectrum expansion ( $\delta$ , acetone- $d_6$ , 600 MHz) of 2'-hydroxy-4-methyldihydrochalcone 5'- $O$ - $\beta$ -D-(4''- $O$ -methyl)-glucopyranoside (**3a**)

**Figure S25.**  $^{13}\text{C}$  NMR spectrum expansion ( $\delta$ , acetone- $d_6$ , 151 MHz) of 2'-hydroxy-4-methyldihydrochalcone 5'- $O$ - $\beta$ -D-(4''- $O$ -methyl)-glucopyranoside (**3a**)

**Figure S26.**  $^{13}\text{C}$  NMR spectrum expansion ( $\delta$ , acetone- $d_6$ , 151 MHz) of 2'-hydroxy-4-methyldihydrochalcone 5'- $O$ - $\beta$ -D-(4''- $O$ -methyl)-glucopyranoside (**3a**)

**Figure S27.**  $^{13}\text{C}$  NMR spectrum expansion ( $\delta$ , acetone- $d_6$ , 151 MHz) of 2'-hydroxy-4-methyldihydrochalcone 5'- $O$ - $\beta$ -D-(4''- $O$ -methyl)-glucopyranoside (**3a**)

**Figure S28.** COSY contour map –  $^1\text{H} \times ^1\text{H}$  of 2'-hydroxy-4-methyldihydrochalcone 5'- $O$ - $\beta$ -D-(4''- $O$ -methyl)-glucopyranoside (**3a**)

**Figure S29.** COSY contour map –  $^1\text{H} \times ^1\text{H}$  expansion of 2'-hydroxy-4-methyldihydrochalcone 5'- $O$ - $\beta$ -D-(4''- $O$ -methyl)-glucopyranoside (**3a**)

**Figure S30.** COSY contour map –  $^1\text{H} \times ^1\text{H}$  expansion of 2'-hydroxy-4-methyldihydrochalcone 5'- $O$ - $\beta$ -D-(4''- $O$ -methyl)-glucopyranoside (**3a**)

**Figure S31.** HSQC contour map –  $^1\text{H} \times ^{13}\text{C}$  of 2'-hydroxy-4-methyldihydrochalcone 5'- $O$ - $\beta$ -D-(4''- $O$ -methyl)-glucopyranoside (**3a**)

**Figure S32.** HSQC contour map –  $^1\text{H} \times ^{13}\text{C}$  expansion of 2'-hydroxy-4-methyldihydrochalcone 5'- $O$ - $\beta$ -D-(4''- $O$ -methyl)-glucopyranoside (**3a**)

**Figure S33.** HSQC contour map –  $^1\text{H} \times ^{13}\text{C}$  expansion of 2'-hydroxy-4-methyldihydrochalcone 5'- $O$ - $\beta$ -D-(4''- $O$ -methyl)-glucopyranoside (**3a**)

**Figure S34.** HMBC contour map –  $^1\text{H} \times ^{13}\text{C}$  of 2'-hydroxy-4-methyldihydrochalcone 5'- $O$ - $\beta$ -D-(4''- $O$ -methyl)-glucopyranoside (**3a**)

**Figure S35.** HMBC contour map –  $^1\text{H} \times ^{13}\text{C}$  expansion of 2'-hydroxy-4-methyldihydrochalcone 5'- $O$ - $\beta$ -D-(4''- $O$ -methyl)-glucopyranoside (**3a**)

**Figure S36.** HMBC contour map –  $^1\text{H} \times ^{13}\text{C}$  expansion of 2'-hydroxy-4-methyldihydrochalcone 5'- $O$ - $\beta$ -D-(4''- $O$ -methyl)-glucopyranoside (**3a**)

**Figure S37.** HMBC contour map –  $^1\text{H} \times ^{13}\text{C}$  expansion of 2'-hydroxy-4-methyldihydrochalcone 5'- $O$ - $\beta$ -D-(4''- $O$ -methyl)-glucopyranoside (**3a**)

**Figure S38.** HMBC contour map –  $^1\text{H} \times ^{13}\text{C}$  expansion of 2'-hydroxy-4-methyldihydrochalcone 5'- $O$ - $\beta$ -D-(4''- $O$ -methyl)-glucopyranoside (**3a**)

**Figure S39.** HMBC contour map –  $^1\text{H} \times ^{13}\text{C}$  expansion of 2'-hydroxy-4-methyldihydrochalcone 5'- $O$ - $\beta$ -D-(4''- $O$ -methyl)-glucopyranoside (**3a**)

**Figure S40.** HMBC contour map –  $^1\text{H} \times ^{13}\text{C}$  expansion of 2'-hydroxy-4-methyldihydrochalcone 5'- $O$ - $\beta$ -D-(4''- $O$ -methyl)-glucopyranoside (**3a**)

**Figure S41.** 2'-Hydroxy-4-methyldihydrochalcone 5'- $O$ - $\beta$ -D-(4''- $O$ -methyl)-glucopyranoside (**3a**) physicochemical and ADME parameters prediction using the SwissADME modelling

**Figure S42.** 2'-Hydroxy-4-methyldihydrochalcone 5'-O- $\beta$ -D-(4''-O-methyl)-glucopyranoside (**3a**) biological activity prediction using the Way2Drug Pass online modelling

**Figure S43.** 2'-Hydroxy-4-methyldihydrochalcone 5'-O- $\beta$ -D-(4''-O-methyl)-glucopyranoside (**3a**) antibacterial activity prediction using the Way2Drug AntiBac-Pred modelling

**Figure S44.** 2'-Hydroxy-4-methyldihydrochalcone 5'-O- $\beta$ -D-(4''-O-methyl)-glucopyranoside (**3a**) antifungal activity prediction using the Way2Drug AntiFun-Pred modelling

**Figure S45.** 2'-Hydroxy-4-methyldihydrochalcone 5'-O- $\beta$ -D-(4''-O-methyl)-glucopyranoside (**3a**) antiviral activity prediction using the Way2Drug AntiVir-Pred modelling

**Figure S46.** MS analysis 4-hydroxymethyldihydrochalcone 2'-O- $\beta$ -D-(4''-O-methyl)-glucopyranoside (**3b**)

**Figure S47.**  $^1\text{H}$  NMR spectrum ( $\delta$ , acetone- $\text{d}_6$ , 600 MHz) of 4-hydroxymethyldihydrochalcone 2'-O- $\beta$ -D-(4''-O-methyl)-glucopyranoside (**3b**)

**Figure S48.**  $^1\text{H}$  NMR spectrum expansion ( $\delta$ , acetone- $\text{d}_6$ , 600 MHz) of 4-hydroxymethyldihydrochalcone 2'-O- $\beta$ -D-(4''-O-methyl)-glucopyranoside (**3b**)

**Figure S49.**  $^1\text{H}$  NMR spectrum expansion ( $\delta$ , acetone- $\text{d}_6$ , 600 MHz) of 4-hydroxymethyldihydrochalcone 2'-O- $\beta$ -D-(4''-O-methyl)-glucopyranoside (**3b**)

**Figure S50.**  $^{13}\text{C}$  NMR spectrum expansion ( $\delta$ , acetone- $\text{d}_6$ , 151 MHz) of 4-hydroxymethyldihydrochalcone 2'-O- $\beta$ -D-(4''-O-methyl)-glucopyranoside (**3b**)

**Figure S51.**  $^{13}\text{C}$  NMR spectrum expansion ( $\delta$ , acetone- $\text{d}_6$ , 151 MHz) of 4-hydroxymethyldihydrochalcone 2'-O- $\beta$ -D-(4''-O-methyl)-glucopyranoside (**3b**)

**Figure S52.**  $^{13}\text{C}$  NMR spectrum expansion ( $\delta$ , acetone- $\text{d}_6$ , 151 MHz) of 4-hydroxymethyldihydrochalcone 2'-O- $\beta$ -D-(4''-O-methyl)-glucopyranoside (**3b**)

**Figure S53.** COSY contour map –  $^1\text{H} \times ^1\text{H}$  of 4-hydroxymethyldihydrochalcone 2'-O- $\beta$ -D-(4''-O-methyl)-glucopyranoside (**3b**)

**Figure S54.** COSY contour map –  $^1\text{H} \times ^1\text{H}$  expansion of 4-hydroxymethyldihydrochalcone 2'-O- $\beta$ -D-(4''-O-methyl)-glucopyranoside (**3b**)

**Figure S55.** COSY contour map –  $^1\text{H} \times ^1\text{H}$  expansion of 4-hydroxymethyldihydrochalcone 2'-O- $\beta$ -D-(4''-O-methyl)-glucopyranoside (**3b**)

**Figure S56.** HSQC contour map –  $^1\text{H} \times ^{13}\text{C}$  of 4-hydroxymethyldihydrochalcone 2'-O- $\beta$ -D-(4''-O-methyl)-glucopyranoside (**3b**)

**Figure S57.** HSQC contour map –  $^1\text{H} \times ^{13}\text{C}$  expansion of 4-hydroxymethyldihydrochalcone 2'-O- $\beta$ -D-(4''-O-methyl)-glucopyranoside (**3b**)

**Figure S58.** HSQC contour map –  $^1\text{H} \times ^{13}\text{C}$  expansion of 4-hydroxymethyldihydrochalcone 2'-O- $\beta$ -D-(4''-O-methyl)-glucopyranoside (**3b**)

**Figure S59.** HMBC contour map –  $^1\text{H} \times ^{13}\text{C}$  of 4-hydroxymethyldihydrochalcone 2'-O- $\beta$ -D-(4''-O-methyl)-glucopyranoside (**3b**)

**Figure S60.** HMBC contour map –  $^1\text{H} \times ^{13}\text{C}$  expansion of 4-hydroxymethyldihydrochalcone 2'-O- $\beta$ -D-(4''-O-methyl)-glucopyranoside (**3b**)

**Figure S61.** HMBC contour map –  $^1\text{H} \times ^{13}\text{C}$  expansion of 4-hydroxymethyldihydrochalcone 2'-O- $\beta$ -D-(4''-O-methyl)-glucopyranoside (**3b**)

**Figure S62.** HMBC contour map –  $^1\text{H} \times ^{13}\text{C}$  expansion of 4-hydroxymethyldihydrochalcone 2'-O- $\beta$ -D-(4''-O-methyl)-glucopyranoside (**3b**)

**Figure S63.** HMBC contour map –  $^1\text{H} \times ^{13}\text{C}$  expansion of 4-hydroxymethyldihydrochalcone 2'-O- $\beta$ -D-(4''-O-methyl)-glucopyranoside (**3b**)

**Figure S64.** HMBC contour map –  $^1\text{H} \times ^{13}\text{C}$  expansion of 4-hydroxymethyldihydrochalcone 2'-O- $\beta$ -D-(4''-O-methyl)-glucopyranoside (**3b**)

**Figure S65.** 4-Hydroxymethyldihydrochalcone 2'-O- $\beta$ -D-(4''-O-methyl)-glucopyranoside (**3b**) physicochemical and ADME parameters prediction using the SwissADME modelling

**Figure S66.** 4-Hydroxymethyldihydrochalcone 2'-O- $\beta$ -D-(4''-O-methyl)-glucopyranoside (**3b**) biological activity prediction using the Way2Drug Pass online modelling

**Figure S67.** 4-Hydroxymethyldihydrochalcone 2'-O- $\beta$ -D-(4''-O-methyl)-glucopyranoside (**3b**) antibacterial activity prediction using the Way2Drug AntiBac-Pred modelling

**Figure S68.** 4-Hydroxymethyldihydrochalcone 2'-O- $\beta$ -D-(4''-O-methyl)-glucopyranoside (**3b**) antifungal activity prediction using the Way2Drug AntiFun-Pred modelling

**Figure S69.** 4-Hydroxymethyldihydrochalcone 2'-O- $\beta$ -D-(4''-O-methyl)-glucopyranoside (**3b**) antiviral activity prediction using the Way2Drug AntiVir-Pred modelling

**Figure S70.** MS analysis 2'-hydroxy-4-hydroxymethylchalcone 5'-O- $\beta$ -D-(4''-O-methyl)-glucopyranoside (**3c**)

**Figure S71.**  $^1\text{H}$  NMR spectrum ( $\delta$ , acetone- $\text{d}_6$ , 600 MHz) of 2'-hydroxy-4-hydroxymethylchalcone 5'-O- $\beta$ -D-(4''-O-methyl)-glucopyranoside (**3c**)

**Figure S72.**  $^1\text{H}$  NMR spectrum expansion ( $\delta$ , acetone- $\text{d}_6$ , 600 MHz) of 2'-hydroxy-4-hydroxymethylchalcone 5'-O- $\beta$ -D-(4''-O-methyl)-glucopyranoside (**3c**)

**Figure S73.**  $^1\text{H}$  NMR spectrum expansion ( $\delta$ , acetone- $\text{d}_6$ , 600 MHz) of 2'-hydroxy-4-hydroxymethylchalcone 5'-O- $\beta$ -D-(4''-O-methyl)-glucopyranoside (**3c**)

**Figure S74.**  $^{13}\text{C}$  NMR spectrum expansion ( $\delta$ , acetone- $\text{d}_6$ , 151 MHz) of 2'-hydroxy-4-hydroxymethylchalcone 5'-O- $\beta$ -D-(4''-O-methyl)-glucopyranoside (**3c**)

**Figure S75.**  $^{13}\text{C}$  NMR spectrum expansion ( $\delta$ , acetone- $\text{d}_6$ , 151 MHz) of 2'-hydroxy-4-hydroxymethylchalcone 5'-O- $\beta$ -D-(4''-O-methyl)-glucopyranoside (**3c**)

**Figure S76.**  $^{13}\text{C}$  NMR spectrum expansion ( $\delta$ , acetone- $\text{d}_6$ , 151 MHz) of 2'-hydroxy-4-hydroxymethylchalcone 5'-O- $\beta$ -D-(4''-O-methyl)-glucopyranoside (**3c**)

**Figure S77.** COSY contour map –  $^1\text{H} \times ^1\text{H}$  of 2'-hydroxy-4-hydroxymethylchalcone 5'-O- $\beta$ -D-(4''-O-methyl)-glucopyranoside (**3c**)

**Figure S78.** COSY contour map –  $^1\text{H} \times ^1\text{H}$  expansion of 2'-hydroxy-4-hydroxymethylchalcone 5'-O- $\beta$ -D-(4''-O-methyl)-glucopyranoside (**3c**)

**Figure S79.** COSY contour map –  $^1\text{H} \times ^1\text{H}$  expansion of 2'-hydroxy-4-hydroxymethylchalcone 5'-O- $\beta$ -D-(4''-O-methyl)-glucopyranoside (**3c**)

**Figure S80.** HSQC contour map –  $^1\text{H} \times ^{13}\text{C}$  of 2'-hydroxy-4-hydroxymethylchalcone 5'-O- $\beta$ -D-(4''-O-methyl)-glucopyranoside (**3c**)

**Figure S81.** HSQC contour map –  $^1\text{H} \times ^{13}\text{C}$  expansion of 2'-hydroxy-4-hydroxymethylchalcone 5'-O- $\beta$ -D-(4''-O-methyl)-glucopyranoside (**3c**)

**Figure S82.** HSQC contour map –  $^1\text{H} \times ^{13}\text{C}$  expansion of 2'-hydroxy-4-hydroxymethylchalcone 5'-O- $\beta$ -D-(4''-O-methyl)-glucopyranoside (**3c**)

**Figure S83.** HMBC contour map –  $^1\text{H} \times ^{13}\text{C}$  of 2'-hydroxy-4-hydroxymethylchalcone 5'-O- $\beta$ -D-(4''-O-methyl)-glucopyranoside (**3c**)



**Figure S84.** HMBC contour map –  $^1\text{H} \times ^{13}\text{C}$  expansion of 2'-hydroxy-4-hydroxymethylchalcone 5'-O- $\beta$ -D-(4''-O-methyl)-glucopyranoside (**3c**)

**Figure S85.** HMBC contour map –  $^1\text{H} \times ^{13}\text{C}$  expansion of 2'-hydroxy-4-hydroxymethylchalcone 5'-O- $\beta$ -D-(4''-O-methyl)-glucopyranoside (**3c**)

**Figure S86.** HMBC contour map –  $^1\text{H} \times ^{13}\text{C}$  expansion of 2'-hydroxy-4-hydroxymethylchalcone 5'-O- $\beta$ -D-(4''-O-methyl)-glucopyranoside (**3c**)

**Figure S87.** HMBC contour map –  $^1\text{H} \times ^{13}\text{C}$  expansion of 2'-hydroxy-4-hydroxymethylchalcone 5'-O- $\beta$ -D-(4''-O-methyl)-glucopyranoside (**3c**)

**Figure S88.** 2'-Hydroxy-4-hydroxymethylchalcone 5'-O- $\beta$ -D-(4''-O-methyl)-glucopyranoside (**3c**) physicochemical and ADME parameters prediction using the SwissADME modelling

**Figure S89.** 2'-Hydroxy-4-hydroxymethylchalcone 5'-O- $\beta$ -D-(4''-O-methyl)-glucopyranoside (**3c**) biological activity prediction using the Way2Drug Pass online modelling

**Figure S90.** 2'-Hydroxy-4-hydroxymethylchalcone 5'-O- $\beta$ -D-(4''-O-methyl)-glucopyranoside (**3c**) antibacterial activity prediction using the Way2Drug AntiBac-Pred modelling

**Figure S91.** 2'-Hydroxy-4-hydroxymethylchalcone 5'-O- $\beta$ -D-(4''-O-methyl)-glucopyranoside (**3c**) antifungal activity prediction using the Way2Drug AntiFun-Pred modelling

**Figure S92.** 2'-Hydroxy-4-hydroxymethylchalcone 5'-O- $\beta$ -D-(4''-O-methyl)-glucopyranoside (**3c**) antiviral activity prediction using the Way2Drug AntiVir-Pred modelling

**Figure S93.** MS analysis of 4'-methyflavone (**5**)

**Figure S94.**  $^1\text{H}$  NMR spectrum ( $\delta$ , acetone- $d_6$ , 600 MHz) of 4'-methyflavone (**5**)

**Figure S95.**  $^1\text{H}$  NMR spectrum expansion ( $\delta$ , acetone- $d_6$ , 600 MHz) of 4'-methyflavone (**5**)

**Figure S96.**  $^{13}\text{C}$  NMR spectrum ( $\delta$ , acetone- $d_6$ , 151 MHz) of 4'-methyflavone (**5**)

**Figure S97.**  $^{13}\text{C}$  NMR spectrum expansion ( $\delta$ , acetone- $d_6$ , 151 MHz) of 4'-methyflavone (**5**)

**Figure S98.** COSY contour map –  $^1\text{H} \times ^1\text{H}$  of 4'-methyflavone (**5**)

**Figure S99.** COSY contour map –  $^1\text{H} \times ^1\text{H}$  expansion of 4'-methyflavone (**5**)

**Figure S100.** COSY contour map –  $^1\text{H} \times ^1\text{H}$  expansion of 4'-methyflavone (**5**)

**Figure S101.** HSQC contour map –  $^1\text{H} \times ^{13}\text{C}$  of 4'-methyflavone (**5**)

**Figure S102.** HSQC contour map –  $^1\text{H} \times ^{13}\text{C}$  expansion of 4'-methyflavone (**5**)

**Figure S103.** HSQC contour map –  $^1\text{H} \times ^{13}\text{C}$  expansion of 4'-methyflavone (**5**)

**Figure S104.** HMBC contour map –  $^1\text{H} \times ^{13}\text{C}$  of 4'-methyflavone (**5**)

**Figure S105.** HMBC contour map –  $^1\text{H} \times ^{13}\text{C}$  expansion of 4'-methyflavone (**5**)

**Figure S106.** HMBC contour map –  $^1\text{H} \times ^{13}\text{C}$  expansion of 4'-methyflavone (**5**)

**Figure S107.** 4'-Methyflavone (**5**) physicochemical and ADME parameters prediction using the SwissADME modelling

**Figure S108.** 4'-Methyflavone (**5**) physicochemical biological activity prediction using the Way2Drug Pass online modelling

**Figure S109.** 4'-Methyflavone (**5**) antibacterial activity prediction using the Way2Drug AntiBac-Pred modelling

**Figure S110.** 4'-Methyflavone (**5**) antifungal activity prediction using the Way2Drug AntiFun-Pred modelling

**Figure S111.** 4'-Methyflavone (**5**) antiviral activity prediction using the Way2Drug AntiVir-Pred modelling

**Figure S112.** MS analysis 4'-hydroxymethylflavone (**5a**)

**Figure S113.**  $^1\text{H}$  NMR spectrum ( $\delta$ , acetone- $d_6$ , 600 MHz) of 4'-hydroxymethylflavone (**5a**)

**Figure S114.**  $^1\text{H}$  NMR spectrum expansion ( $\delta$ , acetone- $\text{d}_6$ , 600 MHz) of 4'-hydroxymethylflavone (**5a**)

**Figure S115.**  $^{13}\text{C}$  NMR spectrum expansion ( $\delta$ , acetone- $\text{d}_6$ , 151 MHz) of 4'-hydroxymethylflavone (**5a**)

**Figure S116.**  $^{13}\text{C}$  NMR spectrum expansion ( $\delta$ , acetone- $\text{d}_6$ , 151 MHz) of 4'-hydroxymethylflavone (**5a**)

**Figure S117.** COSY contour map –  $^1\text{H} \times ^1\text{H}$  of 4'-hydroxymethylflavone (**5a**)

**Figure S118.** COSY contour map –  $^1\text{H} \times ^1\text{H}$  expansion of 4'-hydroxymethylflavone (**5a**)

**Figure S119.** HSQC contour map –  $^1\text{H} \times ^{13}\text{C}$  of 4'-hydroxymethylflavone (**5a**)

**Figure S120.** HSQC contour map –  $^1\text{H} \times ^{13}\text{C}$  expansion of 4'-hydroxymethylflavone (**5a**)

**Figure S121.** HSQC contour map –  $^1\text{H} \times ^{13}\text{C}$  expansion of 4'-hydroxymethylflavone (**5a**)

**Figure S122.** HMBC contour map –  $^1\text{H} \times ^{13}\text{C}$  of 4'-hydroxymethylflavone (**5a**)

**Figure S123.** HMBC contour map –  $^1\text{H} \times ^{13}\text{C}$  expansion of 4'-hydroxymethylflavone (**5a**)

**Figure S124.** HMBC contour map –  $^1\text{H} \times ^{13}\text{C}$  expansion of 4'-hydroxymethylflavone (**5a**)

**Figure S125.** 4'-Hydroxymethylflavone (**5a**) physicochemical and ADME parameters prediction using the SwissADME modelling

**Figure S126.** 4'-Hydroxymethylflavone (**5a**) biological activity prediction using the Way2Drug Pass online modelling

**Figure S127.** 4'-Hydroxymethylflavone (**5a**) antibacterial activity prediction using the Way2Drug AntiBac-Pred modelling

**Figure S128.** 4'-Hydroxymethylflavone (**5a**) antifungal activity prediction using the Way2Drug AntiFun-Pred modelling

**Figure S129.** 4'-Hydroxymethylflavone (**5a**) antiviral activity prediction using the Way2Drug AntiVir-Pred modelling

**Figure S130.** MS analysis flavone 4'-methylene- $O$ - $\beta$ -D-(4''- $O$ -methyl)-glucopyranoside (**5b**)

**Figure S131.**  $^1\text{H}$  NMR spectrum ( $\delta$ , acetone- $\text{d}_6$ , 600 MHz) of flavone 4'-methylene- $O$ - $\beta$ -D-(4''- $O$ -methyl)-glucopyranoside (**5b**)

**Figure S132.**  $^1\text{H}$  NMR spectrum expansion ( $\delta$ , acetone- $\text{d}_6$ , 600 MHz) of flavone 4'-methylene- $O$ - $\beta$ -D-(4''- $O$ -methyl)-glucopyranoside (**5b**)

**Figure S133.**  $^1\text{H}$  NMR spectrum expansion ( $\delta$ , acetone- $\text{d}_6$ , 600 MHz) of flavone 4'-methylene- $O$ - $\beta$ -D-(4''- $O$ -methyl)-glucopyranoside (**5b**)

**Figure S134.**  $^{13}\text{C}$  NMR spectrum expansion ( $\delta$ , acetone- $\text{d}_6$ , 151 MHz) of flavone 4'-methylene- $O$ - $\beta$ -D-(4''- $O$ -methyl)-glucopyranoside (**5b**)

**Figure S135.**  $^{13}\text{C}$  NMR spectrum expansion ( $\delta$ , acetone- $\text{d}_6$ , 151 MHz) of flavone 4'-methylene- $O$ - $\beta$ -D-(4''- $O$ -methyl)-glucopyranoside (**5b**)

**Figure S136.**  $^{13}\text{C}$  NMR spectrum expansion ( $\delta$ , acetone- $\text{d}_6$ , 151 MHz) of flavone 4'-methylene- $O$ - $\beta$ -D-(4''- $O$ -methyl)-glucopyranoside (**5b**)

**Figure S137.** COSY contour map –  $^1\text{H} \times ^1\text{H}$  of flavone 4'-methylene- $O$ - $\beta$ -D-(4''- $O$ -methyl)-glucopyranoside (**5b**)

**Figure S138.** COSY contour map –  $^1\text{H} \times ^1\text{H}$  expansion of flavone 4'-methylene- $O$ - $\beta$ -D-(4''- $O$ -methyl)-glucopyranoside (**5b**)

**Figure S139.** COSY contour map –  $^1\text{H} \times ^1\text{H}$  expansion of flavone 4'-methylene- $O$ - $\beta$ -D-(4''- $O$ -methyl)-glucopyranoside (**5b**)

**Figure S140.** HSQC contour map –  $^1\text{H} \times ^{13}\text{C}$  of flavone 4'-methylene- $O$ - $\beta$ -D-(4''- $O$ -methyl)-glucopyranoside (**5b**)

**Figure S141.** HSQC contour map –  $^1\text{H} \times ^{13}\text{C}$  expansion of flavone 4'-methylene- $O$ - $\beta$ -D-(4''- $O$ -methyl)-glucopyranoside (**5b**)

**Figure S142.** HSQC contour map –  $^1\text{H} \times ^{13}\text{C}$  expansion of flavone 4'-methylene- $O$ - $\beta$ -D-(4''- $O$ -methyl)-glucopyranoside (**5b**)

**Figure S143.** HMBC contour map –  $^1\text{H} \times ^{13}\text{C}$  of flavone 4'-methylene- $O$ - $\beta$ -D-(4''- $O$ -methyl)-glucopyranoside (**5b**)

**Figure S144.** HMBC contour map –  $^1\text{H} \times ^{13}\text{C}$  expansion of flavone 4'-methylene- $O$ - $\beta$ -D-(4''- $O$ -methyl)-glucopyranoside (**5b**)

**Figure S145.** HMBC contour map –  $^1\text{H} \times ^{13}\text{C}$  expansion of flavone 4'-methylene- $O$ - $\beta$ -D-(4''- $O$ -methyl)-glucopyranoside (**5b**)

**Figure S146.** HMBC contour map –  $^1\text{H} \times ^{13}\text{C}$  expansion of flavone 4'-methylene- $O$ - $\beta$ -D-(4''- $O$ -methyl)-glucopyranoside (**5b**)

**Figure S147.** Flavone 4'-methylene- $O$ - $\beta$ -D-(4''- $O$ -methyl)-glucopyranoside (**5b**) physicochemical and ADME parameters prediction using the SwissADME modelling

**Figure S148.** Flavone 4'-methylene- $O$ - $\beta$ -D-(4''- $O$ -methyl)-glucopyranoside (**5b**) biological activity prediction using the Way2Drug Pass online modelling

**Figure S149.** Flavone 4'-methylene- $O$ - $\beta$ -D-(4''- $O$ -methyl)-glucopyranoside (**5b**) antibacterial activity prediction using the Way2Drug AntiBac-Pred modelling

**Figure S150.** Flavone 4'-methylene- $O$ - $\beta$ -D-(4''- $O$ -methyl)-glucopyranoside (**5b**) antifungal activity prediction using the Way2Drug AntiFun-Pred modelling

**Figure S151.** Flavone 4'-methylene- $O$ - $\beta$ -D-(4''- $O$ -methyl)-glucopyranoside (**5b**) antiviral activity prediction using the Way2Drug AntiVir-Pred modelling

**Figure S152.** MS analysis flavone 4'-carboxylic acid (**5c**)

**Figure S153.**  $^1\text{H}$  NMR spectrum ( $\delta$ , acetone- $d_6$ , 600 MHz) of flavone 4'-carboxylic acid (**5c**)

**Figure S154.**  $^1\text{H}$  NMR spectrum expansion ( $\delta$ , acetone- $d_6$ , 600 MHz) of flavone 4'-carboxylic acid (**5c**)

**Figure S155.**  $^{13}\text{C}$  NMR spectrum expansion ( $\delta$ , acetone- $d_6$ , 151 MHz) of flavone 4'-carboxylic acid (**5c**)

**Figure S156.**  $^{13}\text{C}$  NMR spectrum expansion ( $\delta$ , acetone- $d_6$ , 151 MHz) of flavone 4'-carboxylic acid (**5c**)

**Figure S157.** COSY contour map –  $^1\text{H} \times ^1\text{H}$  of flavone 4'-carboxylic acid (**5c**)

**Figure S158.** COSY contour map –  $^1\text{H} \times ^1\text{H}$  expansion of flavone 4'-carboxylic acid (**5c**)

**Figure S159.** HSQC contour map –  $^1\text{H} \times ^{13}\text{C}$  of flavone 4'-carboxylic acid (**5c**)

**Figure S160.** HSQC contour map –  $^1\text{H} \times ^{13}\text{C}$  expansion of flavone 4'-carboxylic acid (**5c**)

**Figure S161.** HMBC contour map –  $^1\text{H} \times ^{13}\text{C}$  of flavone 4'-carboxylic acid (**5c**)

**Figure S162.** HMBC contour map –  $^1\text{H} \times ^{13}\text{C}$  expansion of flavone 4'-carboxylic acid (**5c**)

**Figure S163.** Flavone 4'-carboxylic acid (**5c**) physicochemical and ADME parameters prediction using the SwissADME modelling

**Figure S164.** Flavone 4'-carboxylic acid (**5c**) biological activity prediction using the Way2Drug Pass online modelling

**Figure S165.** Flavone 4'-carboxylic acid (**5c**) antibacterial activity prediction using the Way2Drug AntiBac-Pred modelling

**Figure S166.** Flavone 4'-carboxylic acid (**5c**) antifungal activity prediction using the Way2Drug AntiFun-Pred modelling

**Figure S167.** Flavone 4'-carboxylic acid (**5c**) antiviral activity prediction using the Way2Drug AntiVir-Pred modelling

**Figure S168.** MS analysis 4'-methylflavone 3-O- $\beta$ -D-(4''-O-methyl)-glucopyranoside (**5d**)

**Figure S169.**  $^1\text{H}$  NMR spectrum ( $\delta$ , acetone- $\text{d}_6$ , 600 MHz) of 4'-methylflavone 3-O- $\beta$ -D-(4''-O-methyl)-glucopyranoside (**5d**)

**Figure S170.**  $^1\text{H}$  NMR spectrum expansion ( $\delta$ , acetone- $\text{d}_6$ , 600 MHz) of 4'-methylflavone 3-O- $\beta$ -D-(4''-O-methyl)-glucopyranoside (**5d**)

**Figure S171.**  $^1\text{H}$  NMR spectrum expansion ( $\delta$ , acetone- $\text{d}_6$ , 600 MHz) of 4'-methylflavone 3-O- $\beta$ -D-(4''-O-methyl)-glucopyranoside (**5d**)

**Figure S172.**  $^{13}\text{C}$  NMR spectrum expansion ( $\delta$ , acetone- $\text{d}_6$ , 151 MHz) of 4'-methylflavone 3-O- $\beta$ -D-(4''-O-methyl)-glucopyranoside (**5d**)

**Figure S173.**  $^{13}\text{C}$  NMR spectrum expansion ( $\delta$ , acetone- $\text{d}_6$ , 151 MHz) of 4'-methylflavone 3-O- $\beta$ -D-(4''-O-methyl)-glucopyranoside (**5d**)

**Figure S174.**  $^{13}\text{C}$  NMR spectrum expansion ( $\delta$ , acetone- $\text{d}_6$ , 151 MHz) of 4'-methylflavone 3-O- $\beta$ -D-(4''-O-methyl)-glucopyranoside (**5d**)

**Figure S175.** COSY contour map –  $^1\text{H} \times ^1\text{H}$  of 4'-methylflavone 3-O- $\beta$ -D-(4''-O-methyl)-glucopyranoside (**5d**)

**Figure S176.** COSY contour map –  $^1\text{H} \times ^1\text{H}$  expansion of 4'-methylflavone 3-O- $\beta$ -D-(4''-O-methyl)-glucopyranoside (**5d**)

**Figure S177.** COSY contour map –  $^1\text{H} \times ^1\text{H}$  expansion of 4'-methylflavone 3-O- $\beta$ -D-(4''-O-methyl)-glucopyranoside (**5d**)

**Figure S178.** HSQC contour map –  $^1\text{H} \times ^{13}\text{C}$  of 4'-methylflavone 3-O- $\beta$ -D-(4''-O-methyl)-glucopyranoside (**5d**)

**Figure S179.** HSQC contour map –  $^1\text{H} \times ^{13}\text{C}$  expansion of 4'-methylflavone 3-O- $\beta$ -D-(4''-O-methyl)-glucopyranoside (**5d**)

**Figure S180.** HSQC contour map –  $^1\text{H} \times ^{13}\text{C}$  expansion of 4'-methylflavone 3-O- $\beta$ -D-(4''-O-methyl)-glucopyranoside (**5d**)

**Figure S181.** HMBC contour map –  $^1\text{H} \times ^{13}\text{C}$  of 4'-methylflavone 3-O- $\beta$ -D-(4''-O-methyl)-glucopyranoside (**5d**)

**Figure S182.** HMBC contour map –  $^1\text{H} \times ^{13}\text{C}$  expansion of 4'-methylflavone 3-O- $\beta$ -D-(4''-O-methyl)-glucopyranoside (**5d**)

**Figure S183.** HMBC contour map –  $^1\text{H} \times ^{13}\text{C}$  expansion of 4'-methylflavone 3-O- $\beta$ -D-(4''-O-methyl)-glucopyranoside (**5d**)

**Figure S184.** HMBC contour map –  $^1\text{H} \times ^{13}\text{C}$  expansion of 4'-methylflavone 3-O- $\beta$ -D-(4''-O-methyl)-glucopyranoside (**5d**)

**Figure S185.** 4'-Methylflavone 3-O- $\beta$ -D-(4''-O-methyl)-glucopyranoside (**5d**) physicochemical and ADME parameters prediction using the SwissADME modelling

**Figure S186.** 4'-Methylflavone 3-O- $\beta$ -D-(4''-O-methyl)-glucopyranoside (**5d**) biological activity prediction using the Way2Drug Pass online modelling

**Figure S187.** 4'-Methylflavone 3-O- $\beta$ -D-(4''-O-methyl)-glucopyranoside (**5d**) antibacterial activity prediction using the Way2Drug AntiBac-Pred modelling

**Figure S188.** 4'-Methylflavone 3-O- $\beta$ -D-(4''-O-methyl)-glucopyranoside (**5d**) antifungal activity prediction using the Way2Drug AntiFun-Pred modelling

**Figure S189.** 4'-Methylflavone 3-O- $\beta$ -D-(4''-O-methyl)-glucopyranoside (**5d**) antiviral activity prediction using the Way2Drug AntiVir-Pred modelling

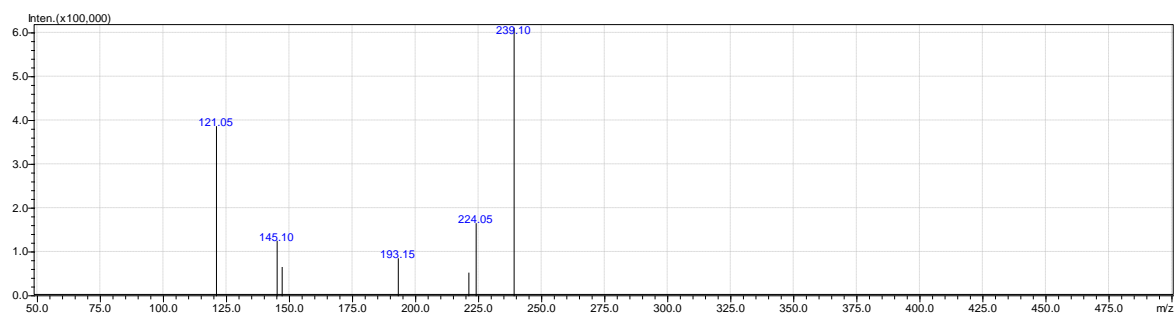

**Figure S1.** MS analysis of 2'-hydroxy-4-methylchalcone (**3**)

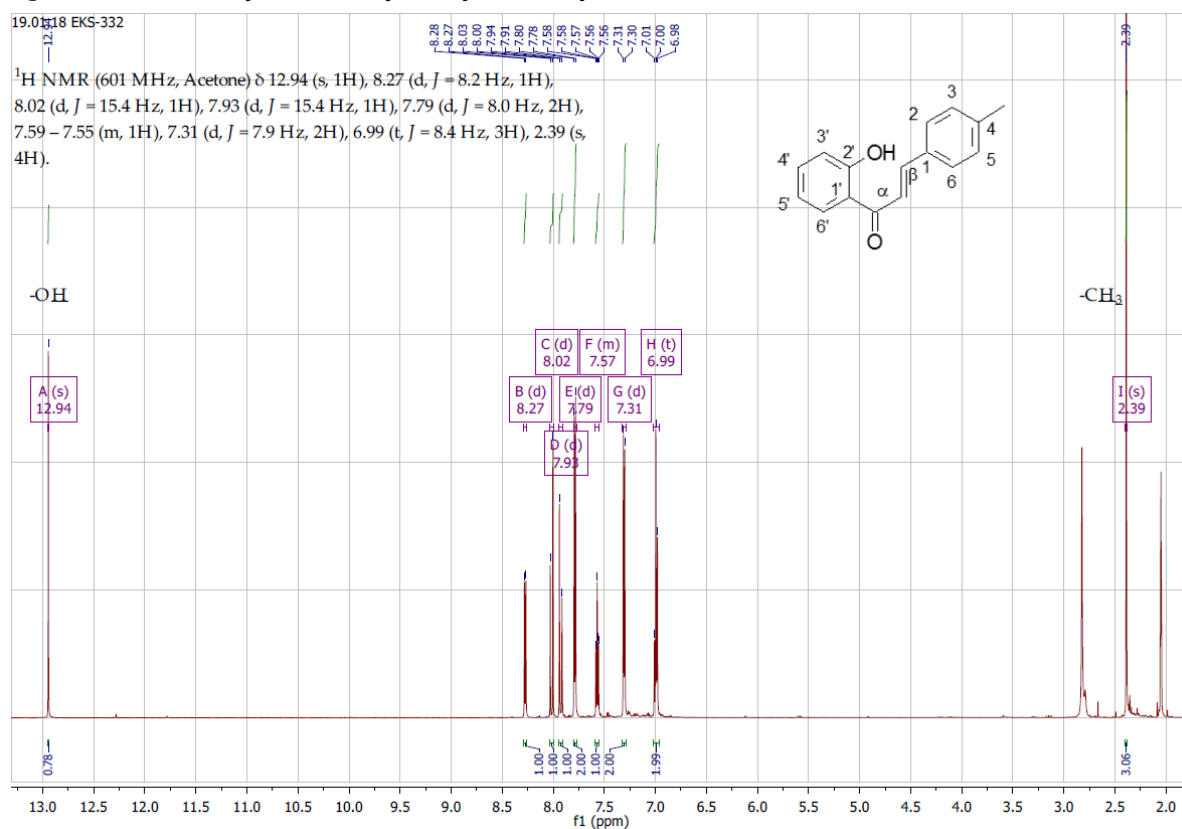

**Figure S2.** <sup>1</sup>H NMR spectrum ( $\delta$ , acetone-d<sub>6</sub>, 600 MHz) of 2'-hydroxy-4-methylchalcone (**3**)

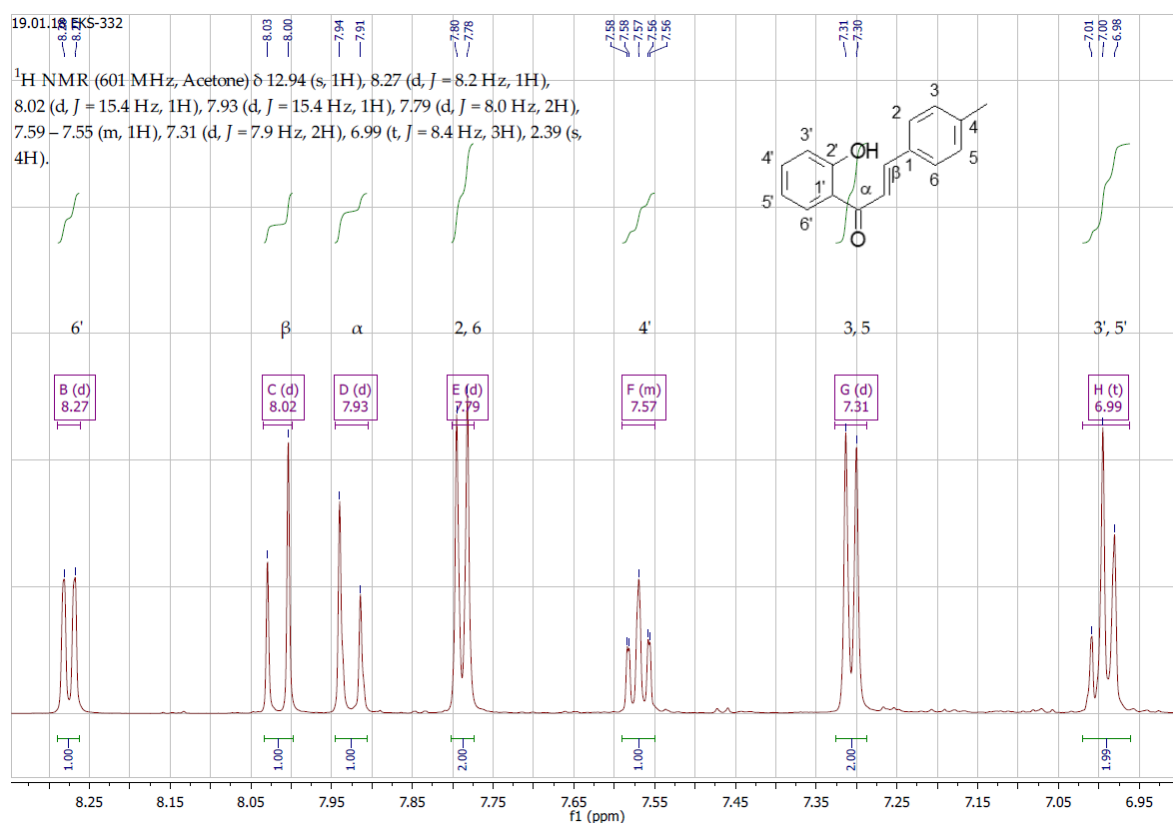

**Figure S3** <sup>1</sup>H NMR spectrum expansion (δ, acetone-d<sub>6</sub>, 600 MHz) of 2'-hydroxy-4-methylchalcone (3)

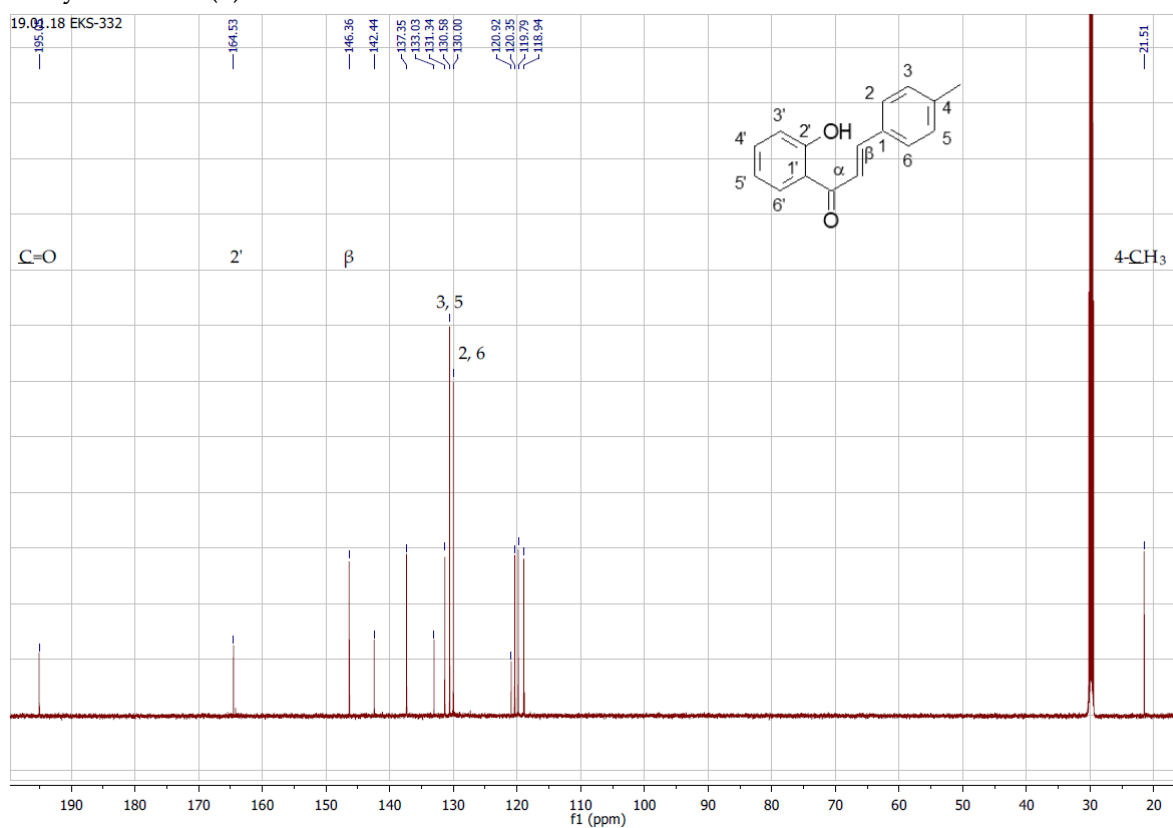

**Figure S4.** <sup>13</sup>C NMR spectrum (δ, acetone-d<sub>6</sub>, 151 MHz) of 2'-hydroxy-4-methylchalcone (3)

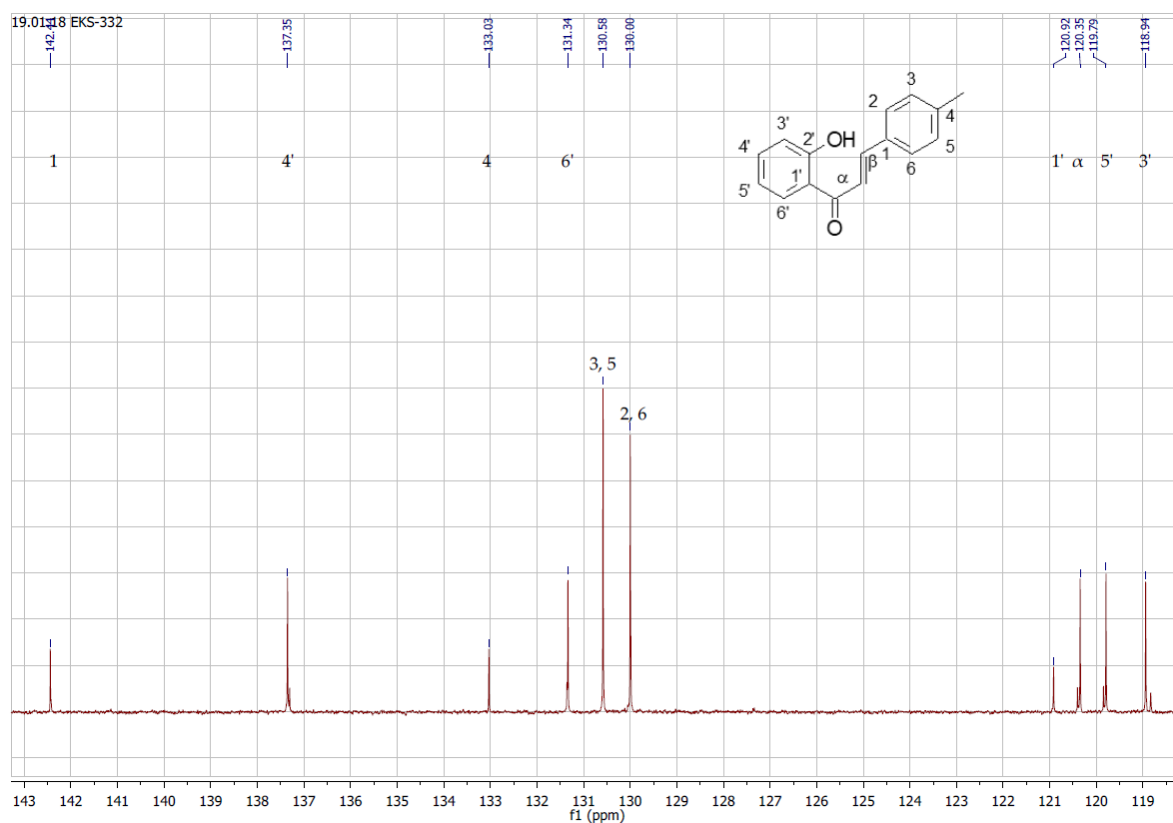

**Figure S5.**  $^{13}\text{C}$  NMR spectrum expansion ( $\delta$ , acetone- $\text{d}_6$ , 151 MHz) of 2'-hydroxy-4-methylchalcone (**3**)

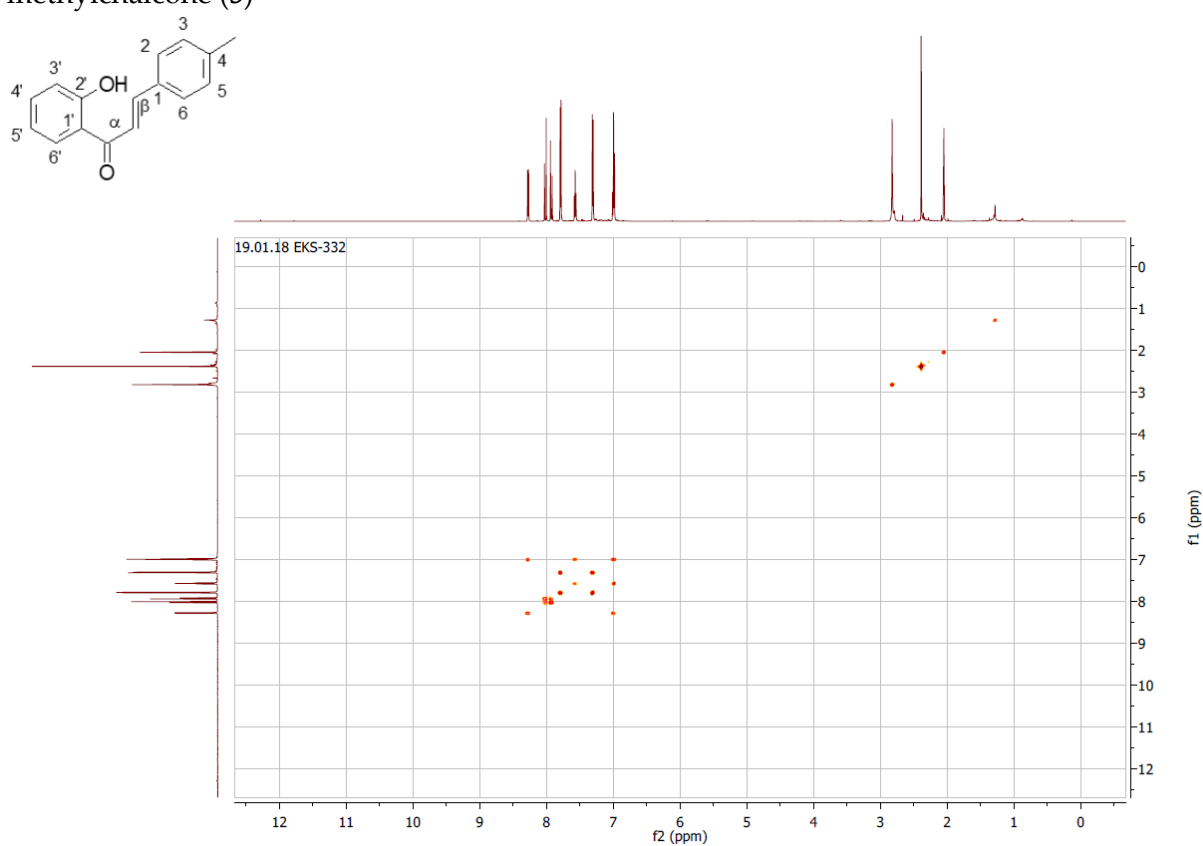

**Figure S6.** COSY contour map –  $^1\text{H} \times ^1\text{H}$  of 2'-hydroxy-4-methylchalcone (**3**)



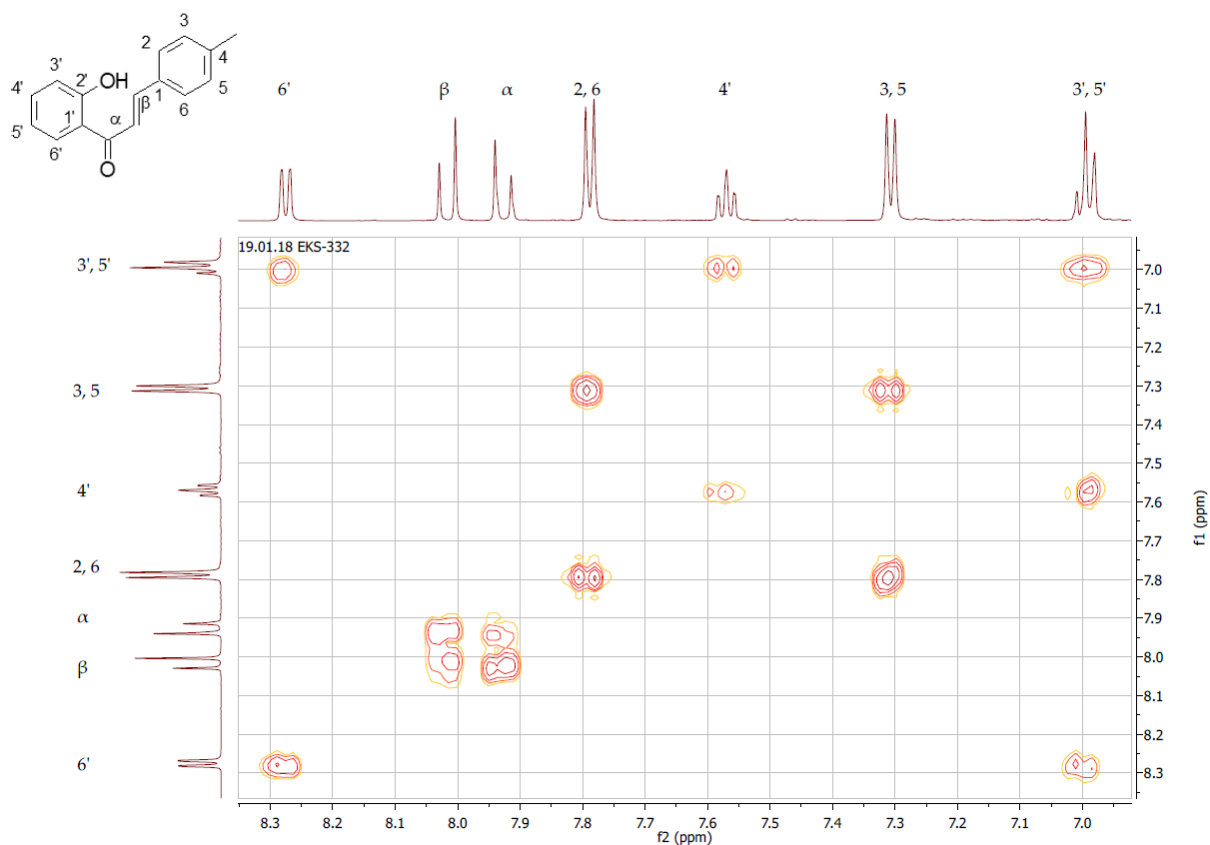

**Figure S7.** COSY contour map –  $^1\text{H} \times ^1\text{H}$  expansion of 2'-hydroxy-4-methylchalcone (3)

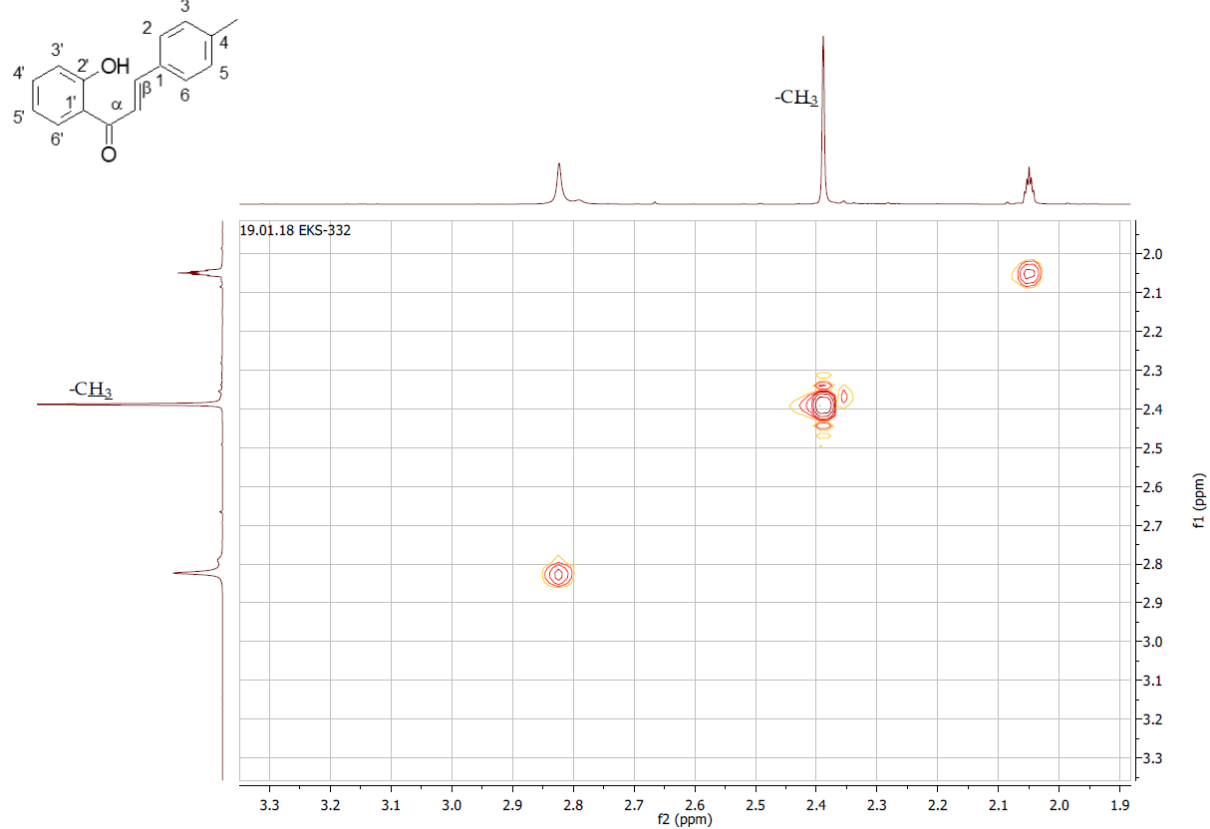

**Figure S8.** COSY contour map –  $^1\text{H} \times ^1\text{H}$  expansion of 2'-hydroxy-4-methylchalcone (3)

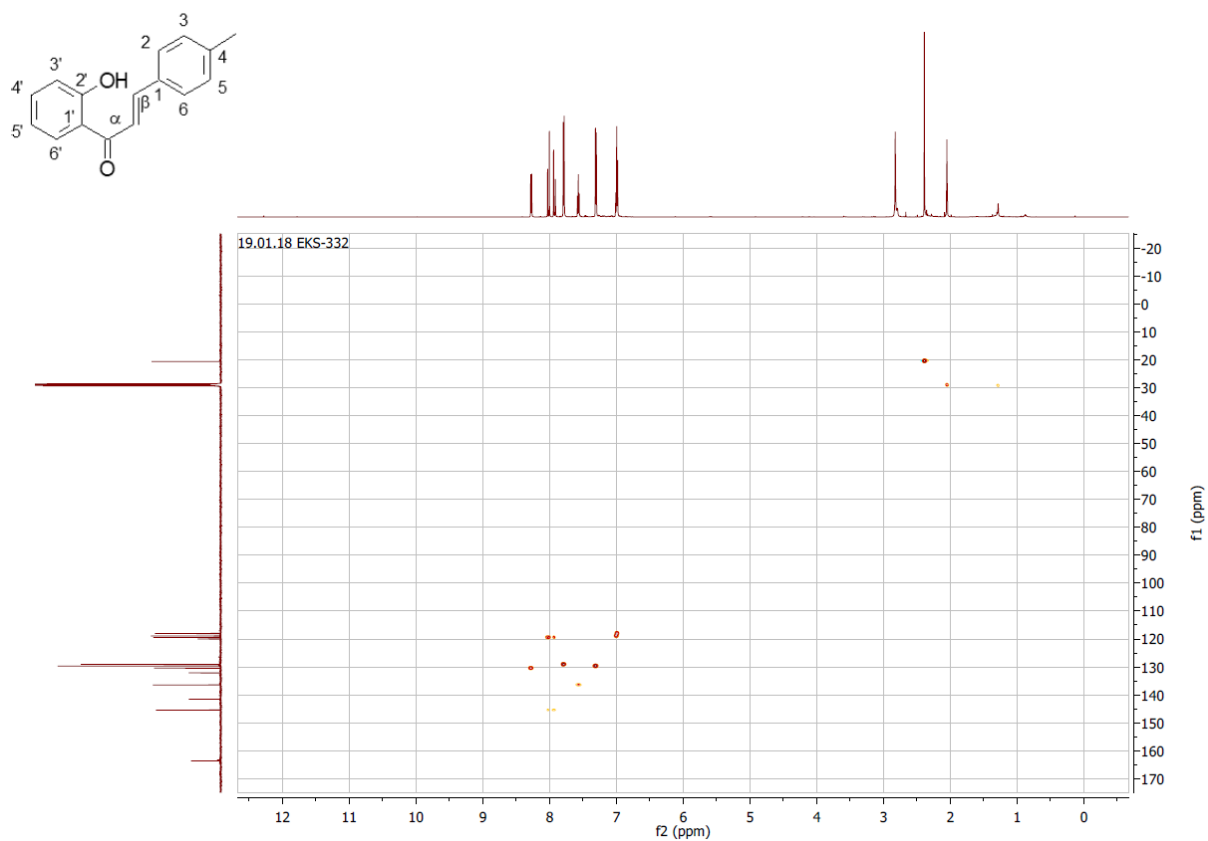

**Figure S9.** HSQC contour map –  $^1\text{H} \times ^{13}\text{C}$  of 2'-hydroxy-4-methylchalcone (**3**)

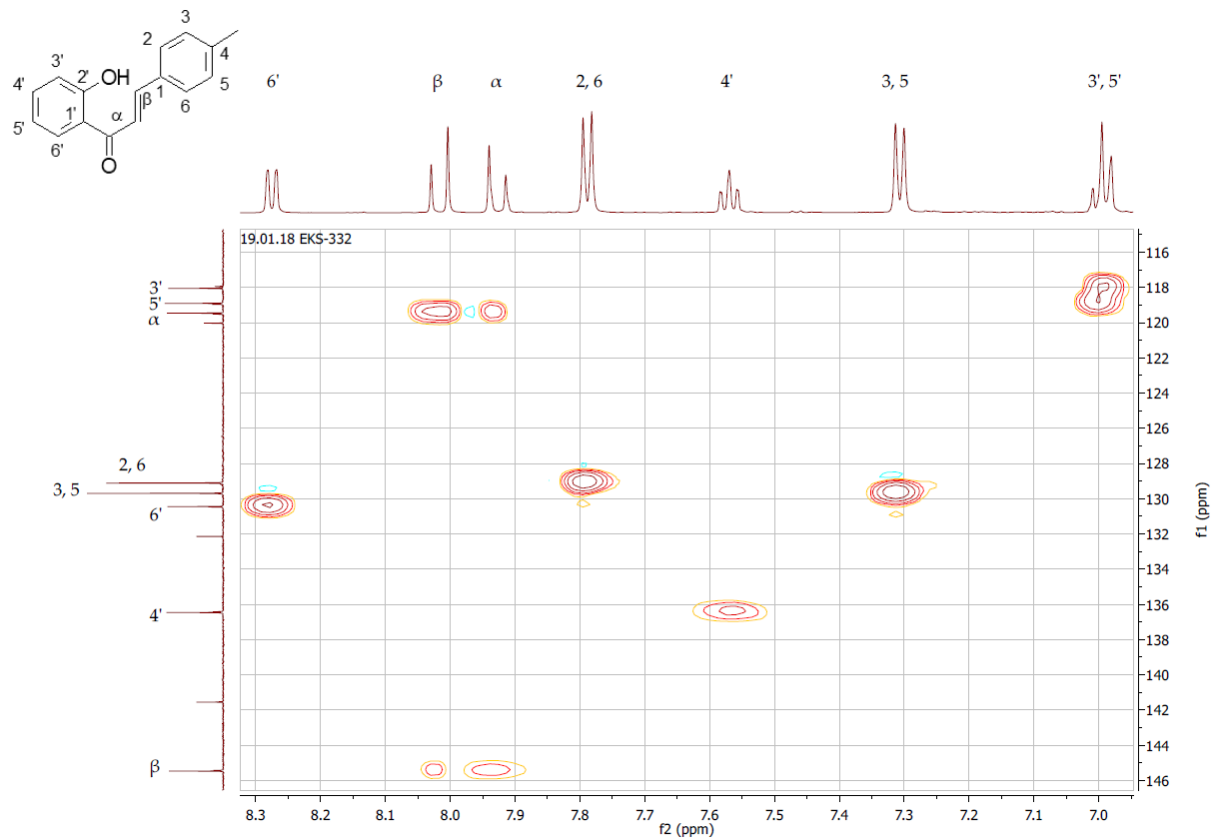

**Figure S10.** HSQC contour map –  $^1\text{H} \times ^{13}\text{C}$  expansion of 2'-hydroxy-4-methylchalcone (**3**)

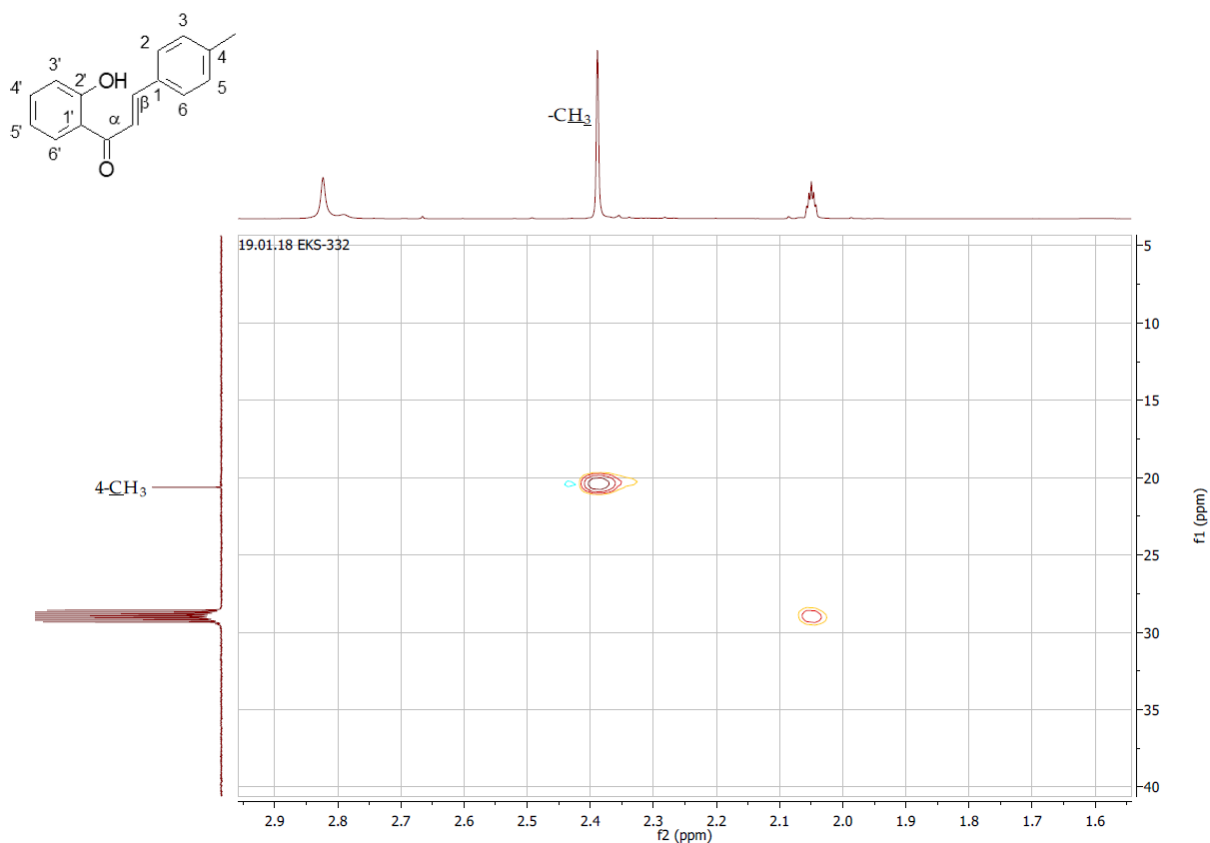

**Figure S11.** HSQC contour map –  $^1\text{H} \times ^{13}\text{C}$  expansion of 2'-hydroxy-4-methylchalcone (3)

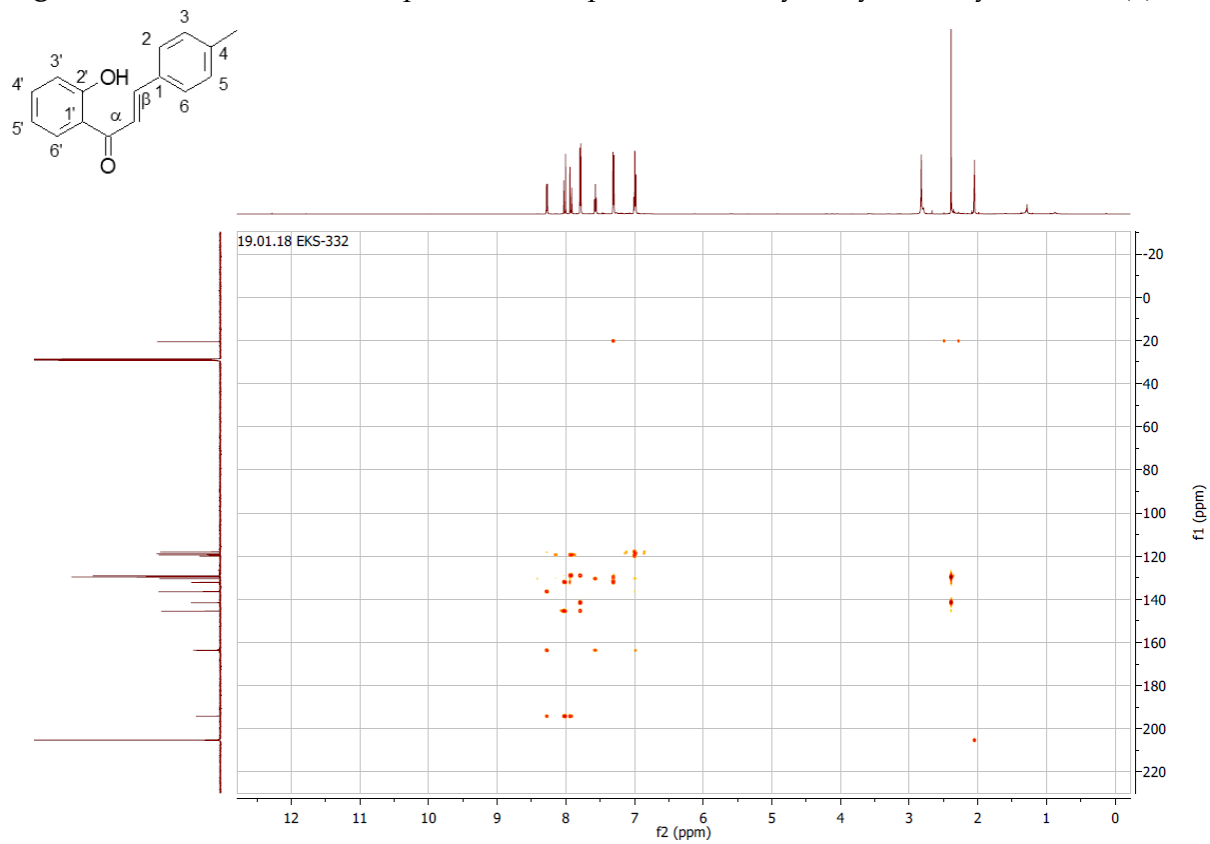

**Figure S12.** HMBC contour map –  $^1\text{H} \times ^{13}\text{C}$  of 2'-hydroxy-4-methylchalcone (3)

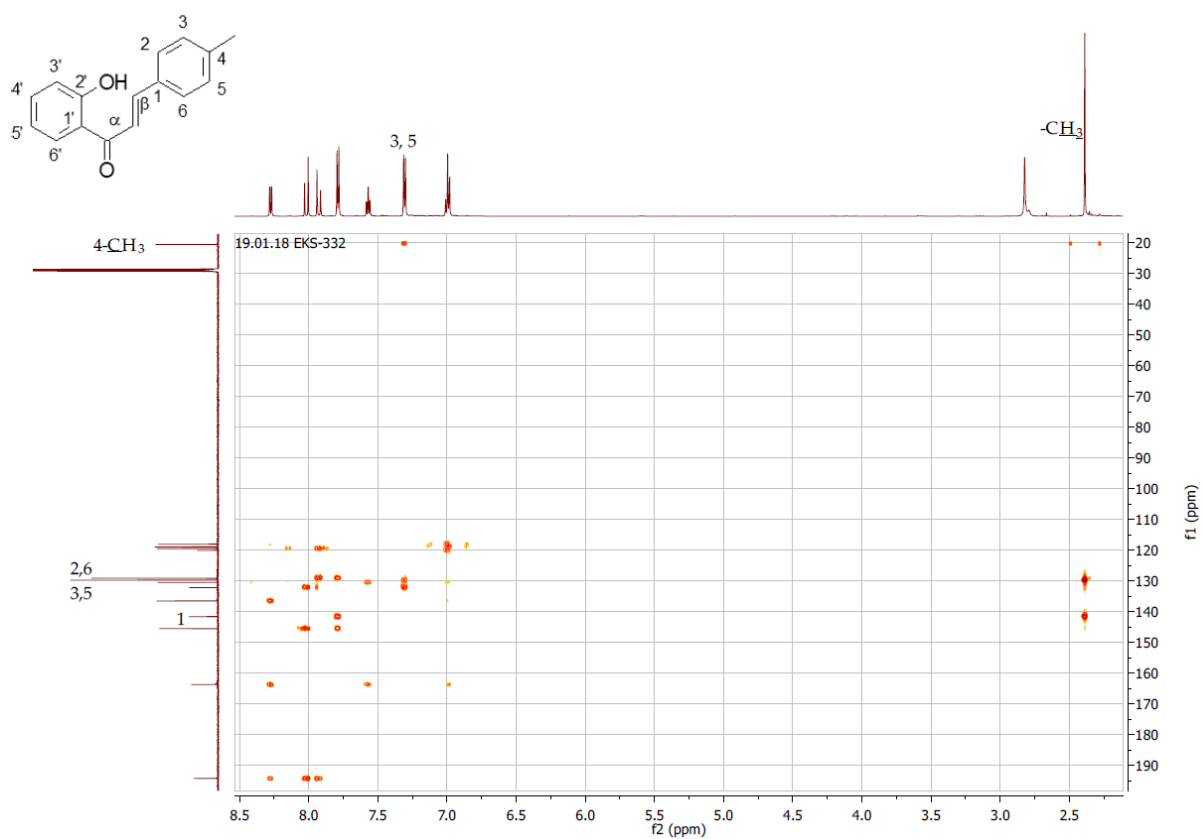

**Figure S13.** HMBC contour map –  $^1\text{H} \times ^{13}\text{C}$  expansion of 2'-hydroxy-4-methylchalcone (3)

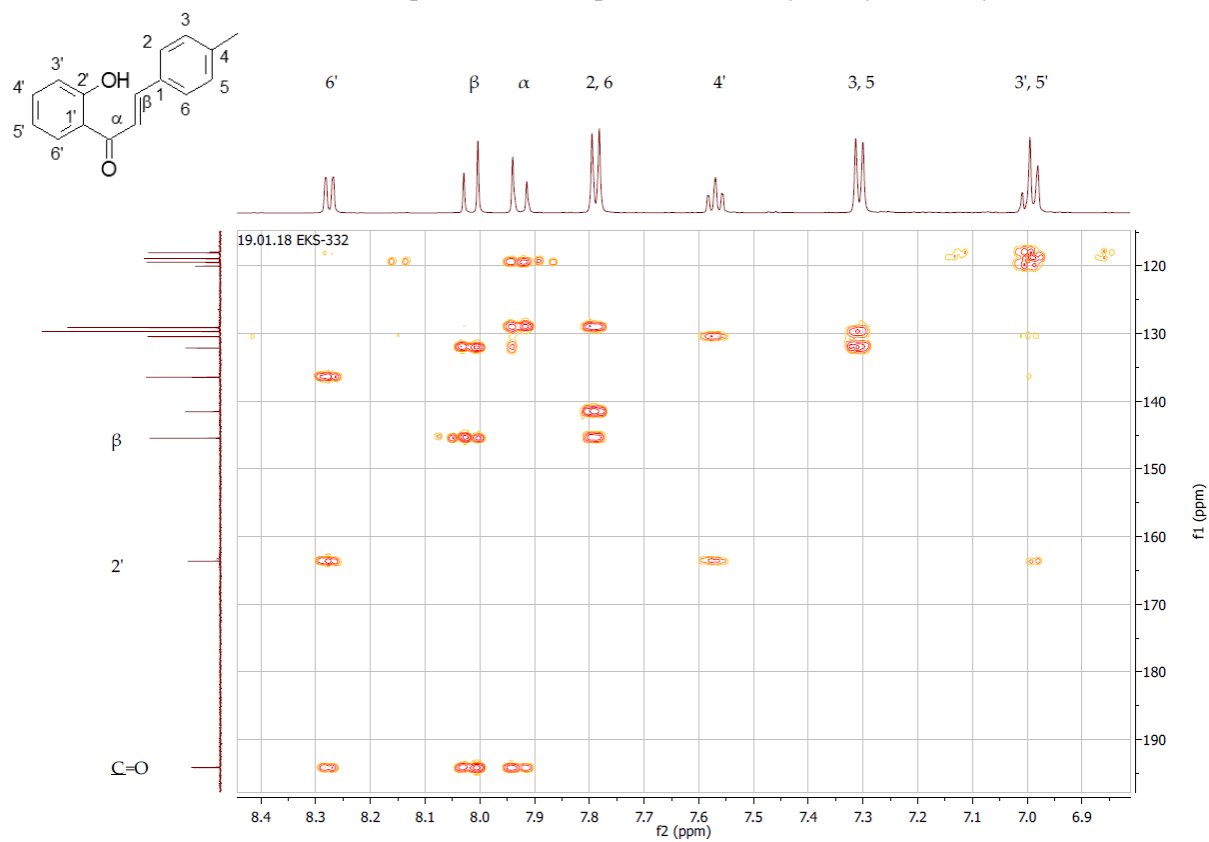

**Figure S14.** HMBC contour map –  $^1\text{H} \times ^{13}\text{C}$  expansion of 2'-hydroxy-4-methylchalcone (3)

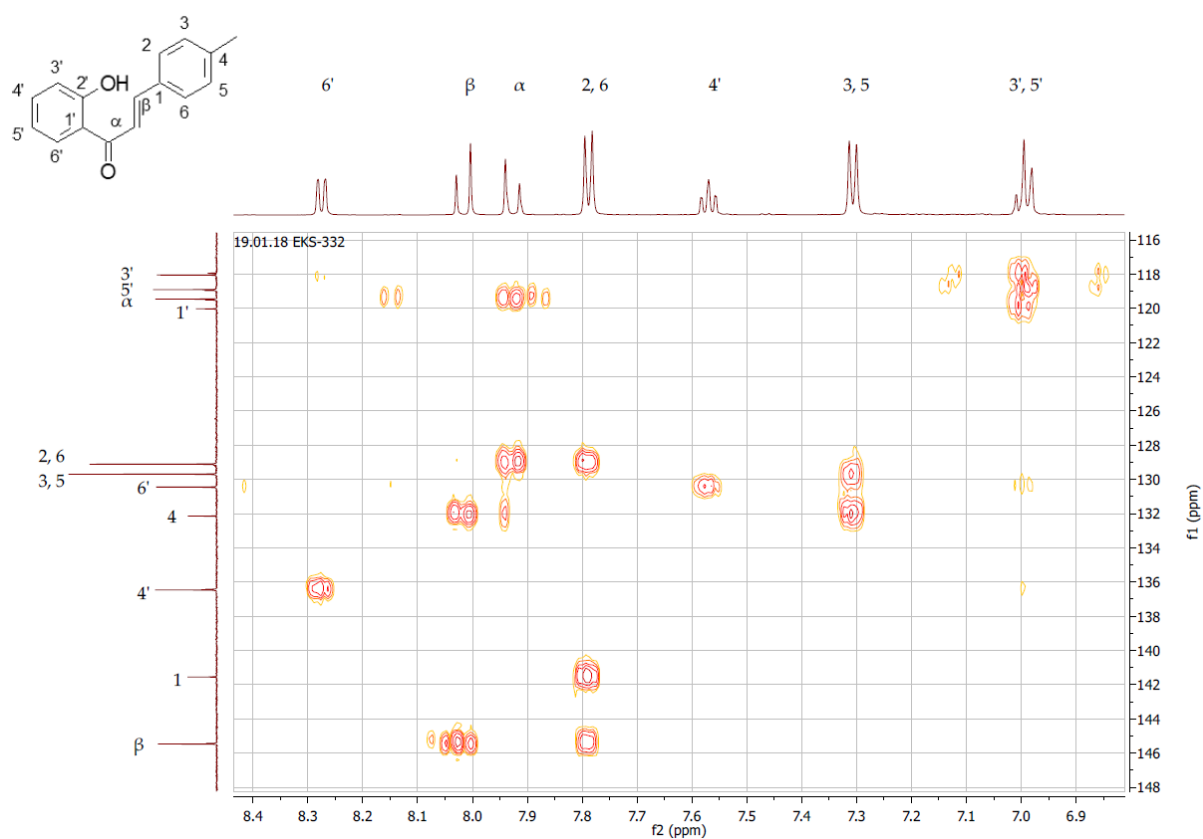

**Figure S15.** HMBC contour map –  $^1\text{H} \times ^{13}\text{C}$  expansion of 2'-hydroxy-4-methylchalcone (3)

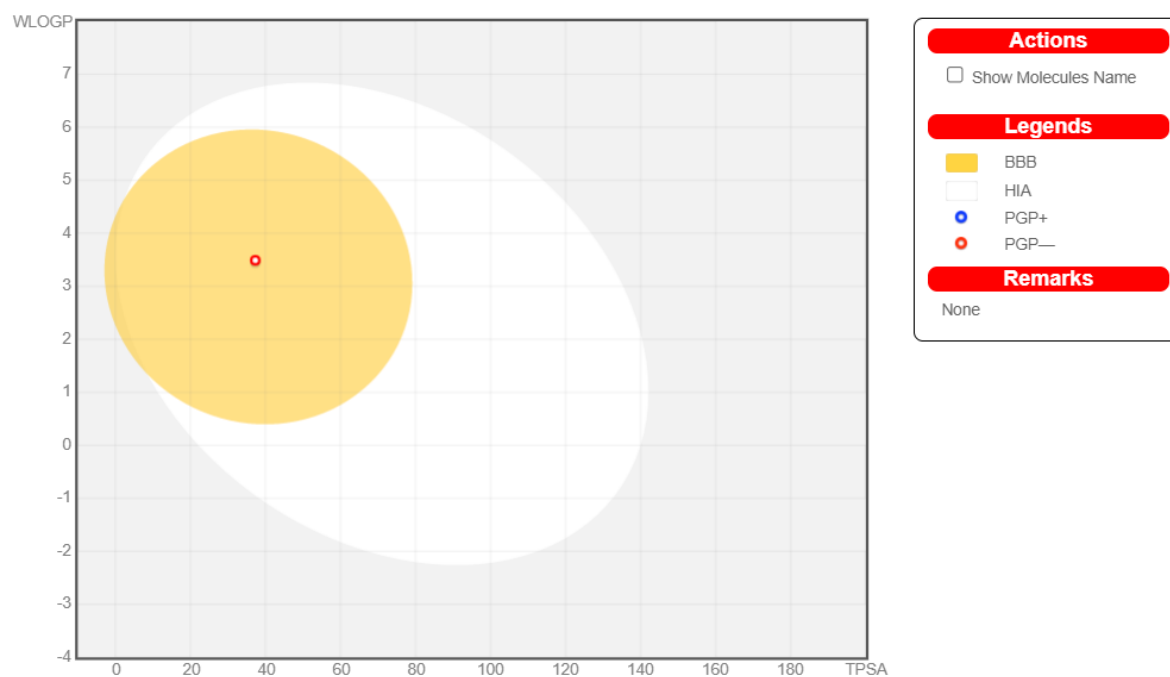

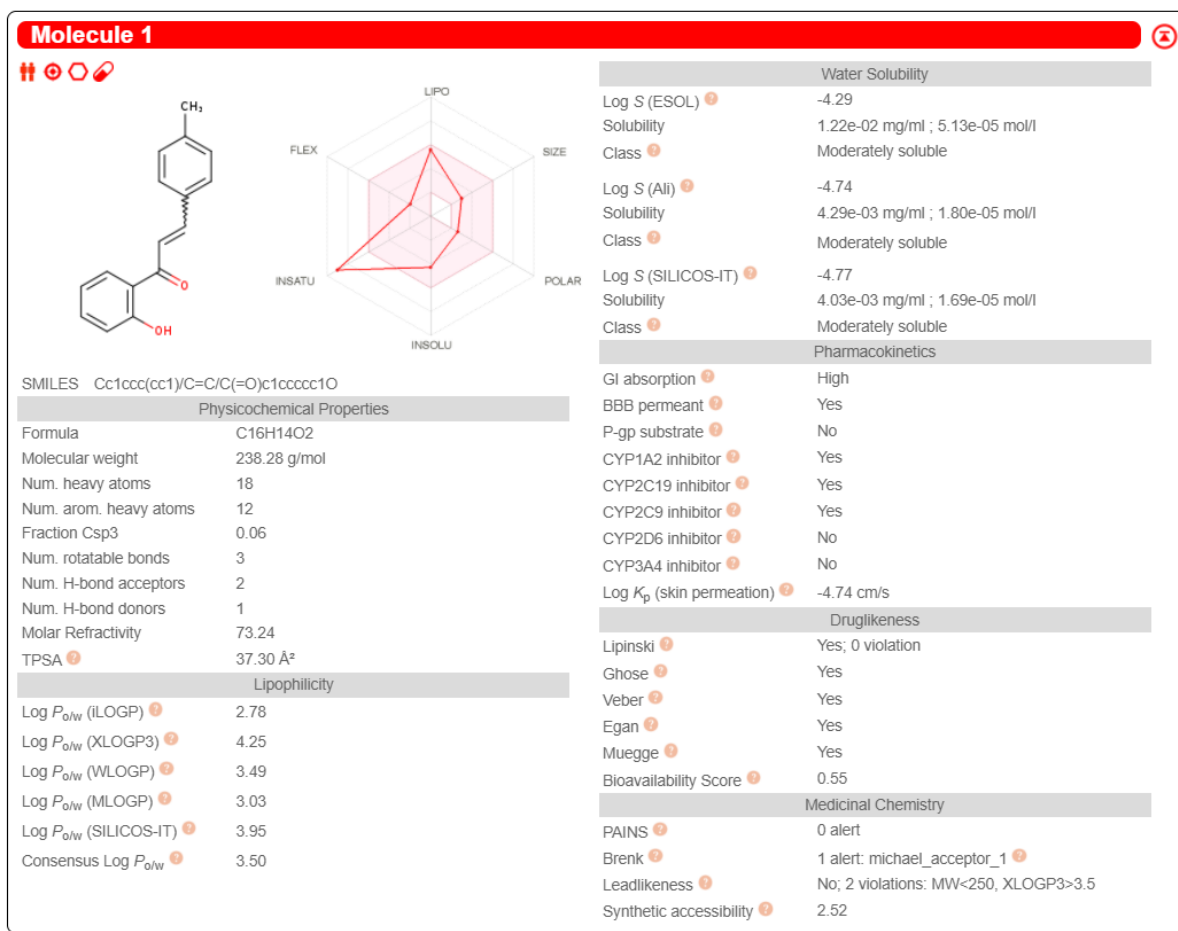

**Figure S16.** 2'-Hydroxy-4-methylchalcone (3) physicochemical and ADME parameters prediction using the SwissADME modelling

| Pa    | Pi    | Activity                                               |
|-------|-------|--------------------------------------------------------|
| 0,944 | 0,004 | Mucomembranous protector                               |
| 0,908 | 0,004 | Feruloyl esterase inhibitor                            |
| 0,901 | 0,011 | Membrane integrity agonist                             |
| 0,872 | 0,002 | 1-Acylglycerol-3-phosphate O-acyltransferase inhibitor |
| 0,845 | 0,003 | Monophenol monooxygenase inhibitor                     |
| 0,843 | 0,003 | Antihypoxic                                            |
| 0,834 | 0,003 | Pyruvate decarboxylase inhibitor                       |
| 0,836 | 0,005 | JAK2 expression inhibitor                              |
| 0,849 | 0,020 | Aspulvinone dimethylallyltransferase inhibitor         |
| 0,828 | 0,003 | Carminative                                            |

**Figure S17.** 2'-Hydroxy-4-methylchalcone (3) physicochemical biological activity prediction using the Way2Drug Pass online modelling

| Name                                       | Confidence | ChEMBL ID                    |
|--------------------------------------------|------------|------------------------------|
| Prevotella intermedia                      | 0.3405     | <a href="#">CHEMBL613261</a> |
| RESISTANT Staphylococcus simulans          | 0.3394     | <a href="#">CHEMBL612425</a> |
| Staphylococcus simulans                    | 0.3358     | <a href="#">CHEMBL612425</a> |
| Yersinia pestis                            | 0.3259     | <a href="#">CHEMBL614597</a> |
| Streptococcus mutans                       | 0.2994     | <a href="#">CHEMBL612426</a> |
| Staphylococcus sciuri                      | 0.2866     | <a href="#">CHEMBL613150</a> |
| Bacillus subtilis subsp. subtilis str. 168 | 0.2656     | <a href="#">CHEMBL613315</a> |
| Mycobacterium marinum                      | 0.2552     | <a href="#">CHEMBL614987</a> |
| Porphyromonas gingivalis                   | 0.2538     | <a href="#">CHEMBL614414</a> |
| RESISTANT Bacteroides thetaiotaomicron     | 0.2359     | <a href="#">CHEMBL614412</a> |
| Streptococcus sanguinis                    | 0.1991     | <a href="#">CHEMBL612314</a> |
| Pseudomonas fluorescens                    | 0.1910     | <a href="#">CHEMBL612500</a> |

**Figure S18.** 2'-Hydroxy-4-methylchalcone (**3**) antibacterial activity prediction using the Way2Drug AntiBac-Pred modelling

| Name                        | Confidence | ChEMBL ID                    |
|-----------------------------|------------|------------------------------|
| Epidermophyton floccosum    | 0.2695     | <a href="#">CHEMBL612386</a> |
| Trichophyton mentagrophytes | 0.1523     | <a href="#">CHEMBL613162</a> |
| Trichosporon asahii         | 0.0529     | <a href="#">CHEMBL613164</a> |

**Figure S19.** 2'-Hydroxy-4-methylchalcone (**3**) antifungal activity prediction using the Way2Drug AntiFun-Pred modelling

| Virus                                                                       | Protein target                                | Confidence |
|-----------------------------------------------------------------------------|-----------------------------------------------|------------|
| Dengue virus type 2                                                         | Genome polyprotein                            | 0.6219     |
| Human immunodeficiency virus 2                                              | Human immunodeficiency virus type 2 integrase | 0.5956     |
| Severe acute respiratory syndrome coronavirus 2                             | Replicase polyprotein 1ab                     | 0.5489     |
| Infectious bronchitis virus                                                 | 3C-like protease                              | 0.2282     |
| Human immunodeficiency virus 1                                              | Human immunodeficiency virus type 1 integrase | 0.1729     |
| Varicella-zoster virus (strain Dumas) (HHV-3) (Human herpesvirus 3)         | DNA polymerase                                | 0.1221     |
| Herpes simplex virus (type 1 / strain 17)                                   | Human herpesvirus 1 DNA polymerase            | 0.1221     |
| Vaccinia virus (strain Western Reserve) (VACV) (Vaccinia virus (strain WR)) | DNA polymerase                                | 0.0687     |

**Figure S20.** 2'-Hydroxy-4-methylchalcone (**3**) antiviral activity prediction using the Way2Drug AntiVir-Pred modelling

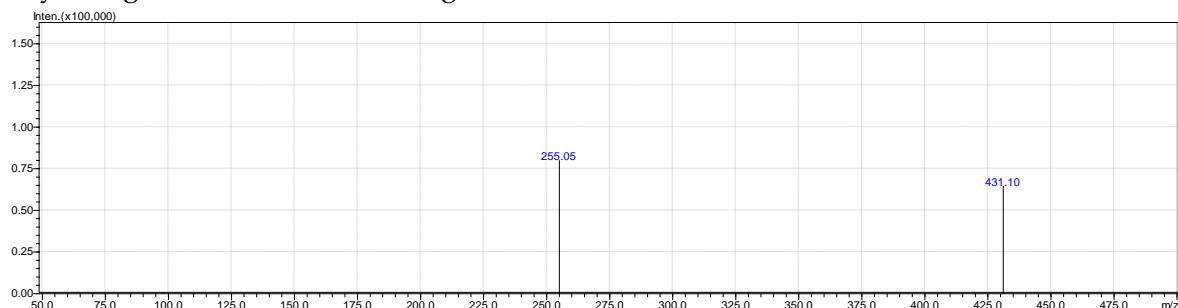

**Figure S21.** MS analysis 2'-hydroxy-4-methyldihydrochalcone 5'-O- $\beta$ -D-(4''-O-methyl)-glucopyranoside (**3a**)

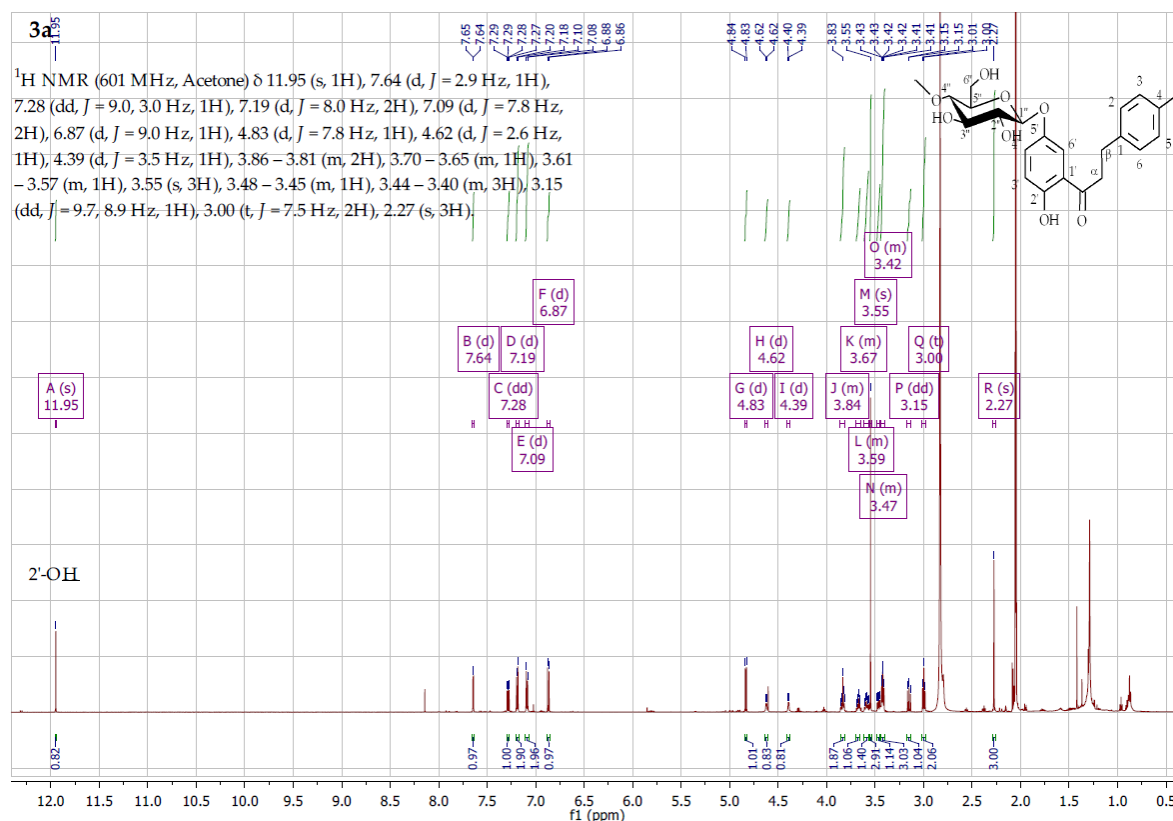

**Figure S22.** <sup>1</sup>H NMR spectrum (δ, acetone-d<sub>6</sub>, 600 MHz) of 2'-hydroxy-4-methyldihydrochalcone 5'-*O*-β-D-(4''-*O*-methyl)-glucopyranoside (**3a**)

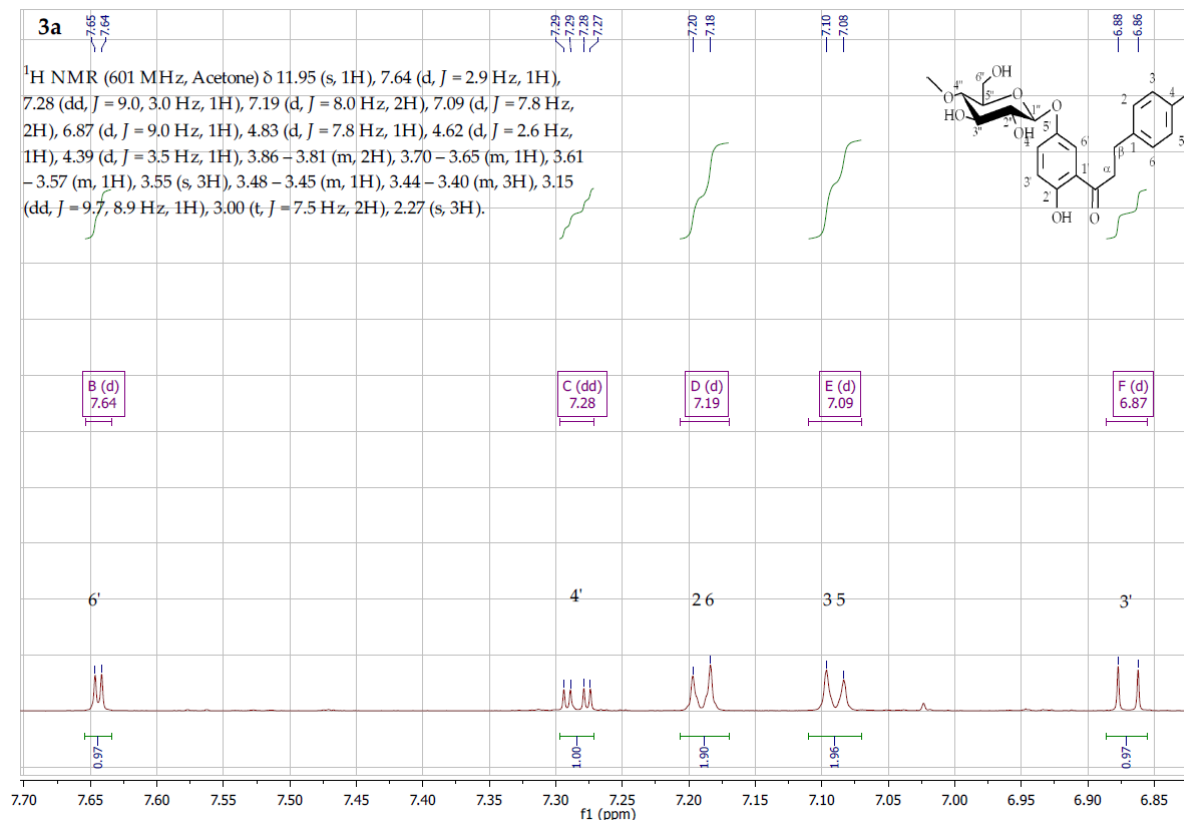

**Figure S23.** <sup>1</sup>H NMR spectrum expansion (δ, acetone-d<sub>6</sub>, 600 MHz) of 2'-hydroxy-4-methyldihydrochalcone 5'-*O*-β-D-(4''-*O*-methyl)-glucopyranoside (**3a**)



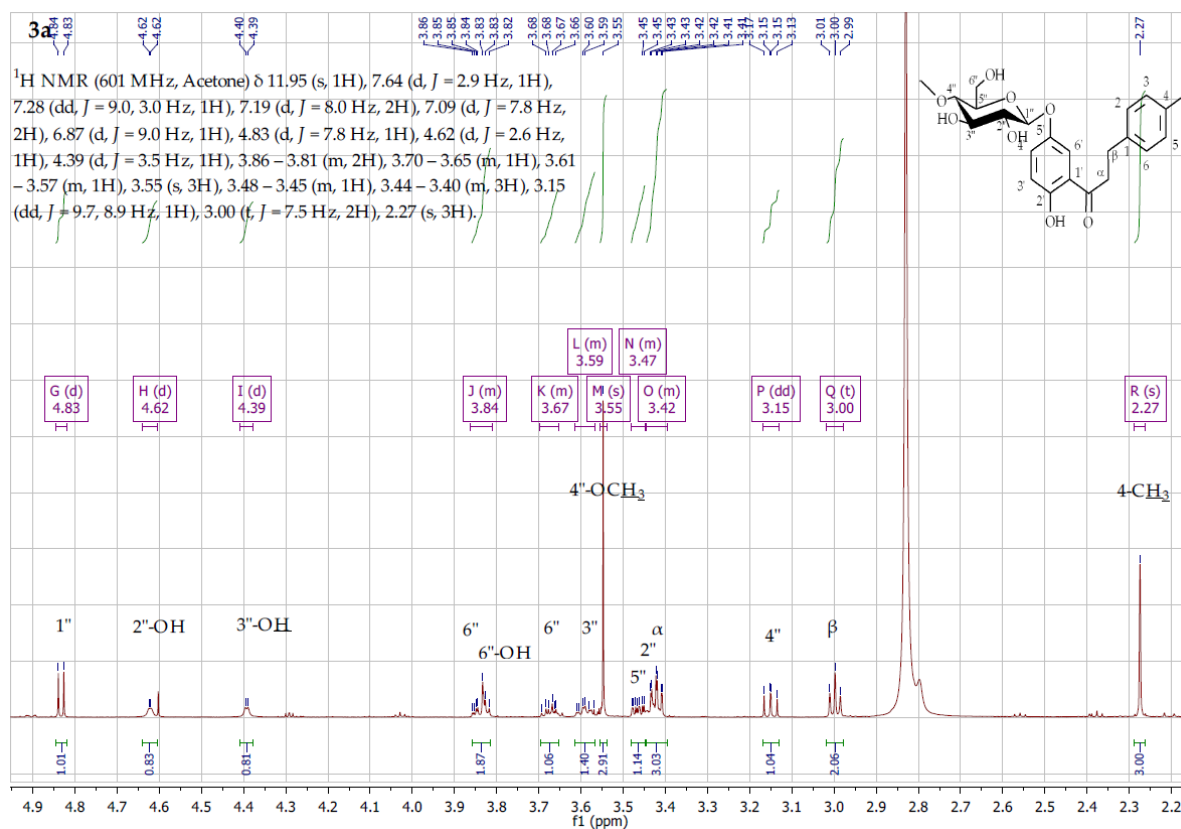

**Figure S24.** <sup>1</sup>H NMR spectrum expansion (δ, acetone-d<sub>6</sub>, 600 MHz) of 2'-hydroxy-4-methyldihydrochalcone 5'-O-β-D-(4''-O-methyl)-glucopyranoside (**3a**)

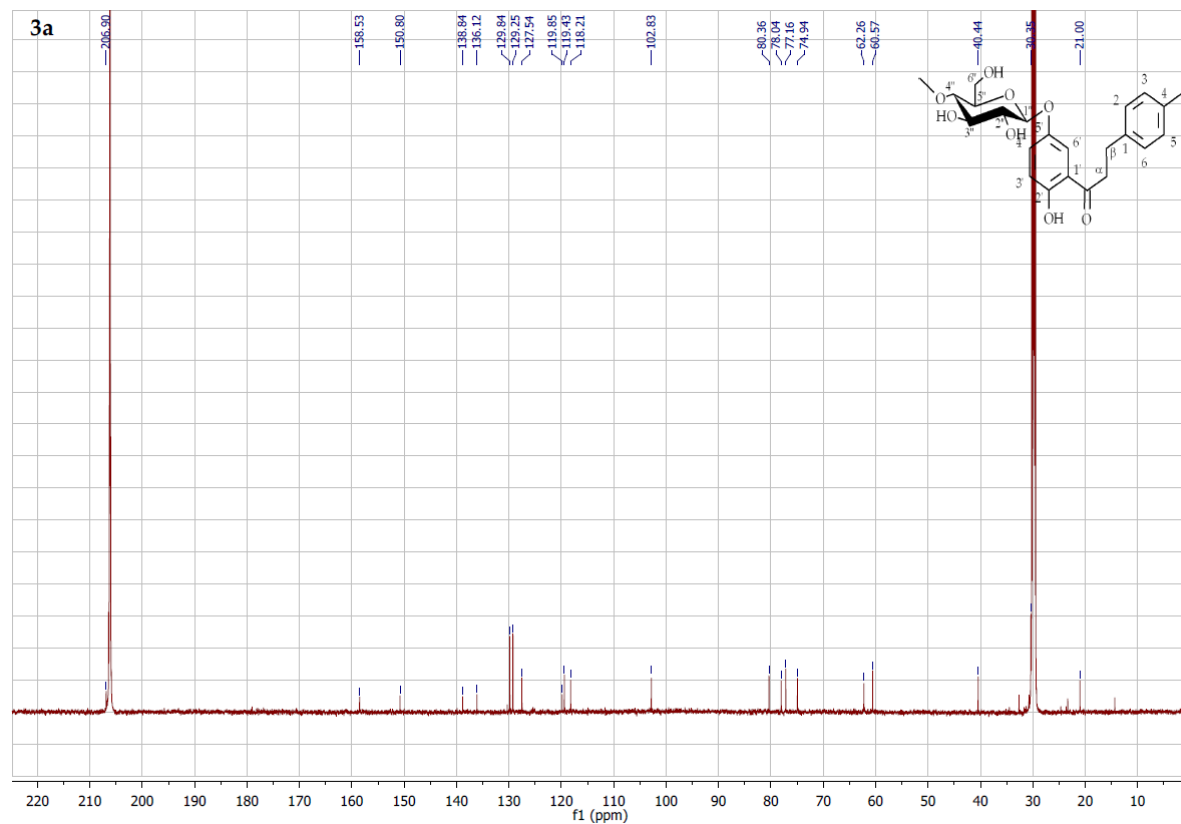

**Figure S25.** <sup>13</sup>C NMR spectrum expansion (δ, acetone-d<sub>6</sub>, 151 MHz) of 2'-hydroxy-4-methyldihydrochalcone 5'-O-β-D-(4''-O-methyl)-glucopyranoside (**3a**)

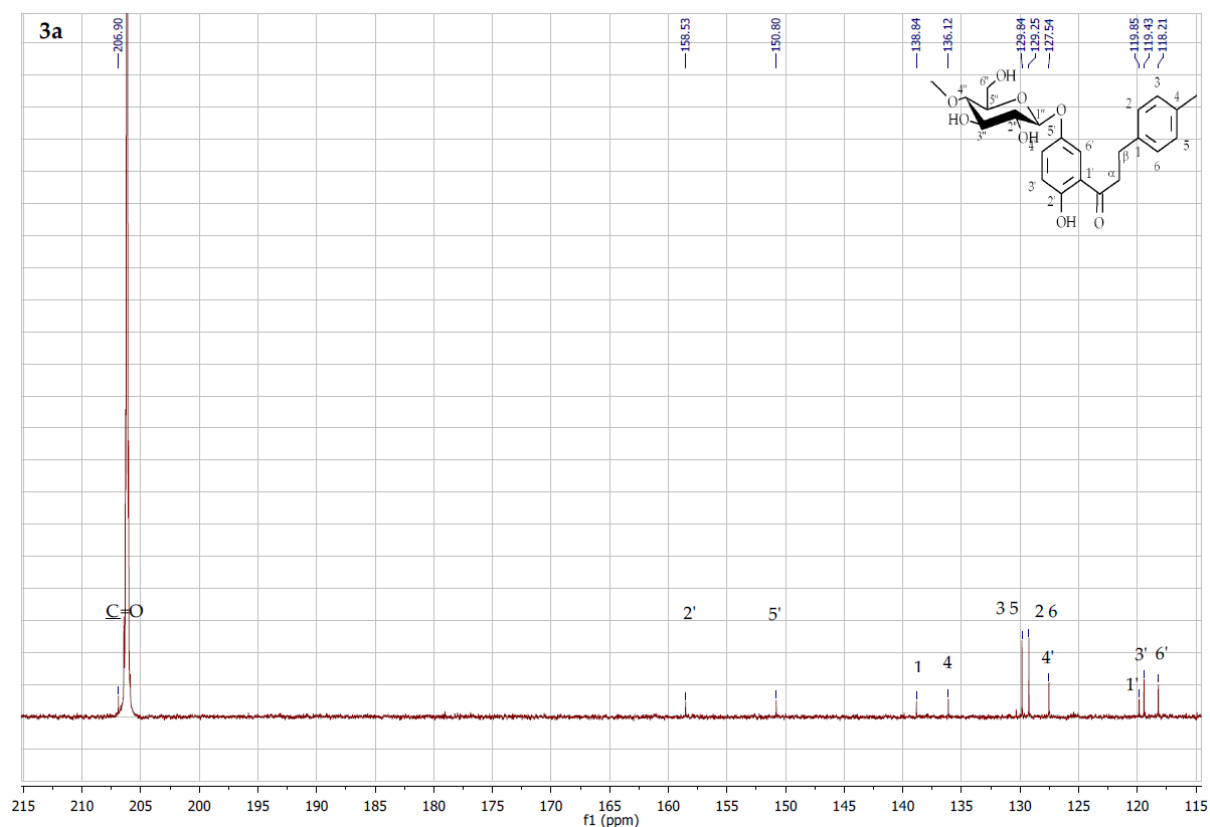

**Figure S26.**  $^{13}\text{C}$  NMR spectrum expansion ( $\delta$ , acetone- $d_6$ , 151 MHz) of 2'-hydroxy-4-methyldihydrochalcone 5'- $O$ - $\beta$ -D-(4''- $O$ -methyl)-glucopyranoside (**3a**)

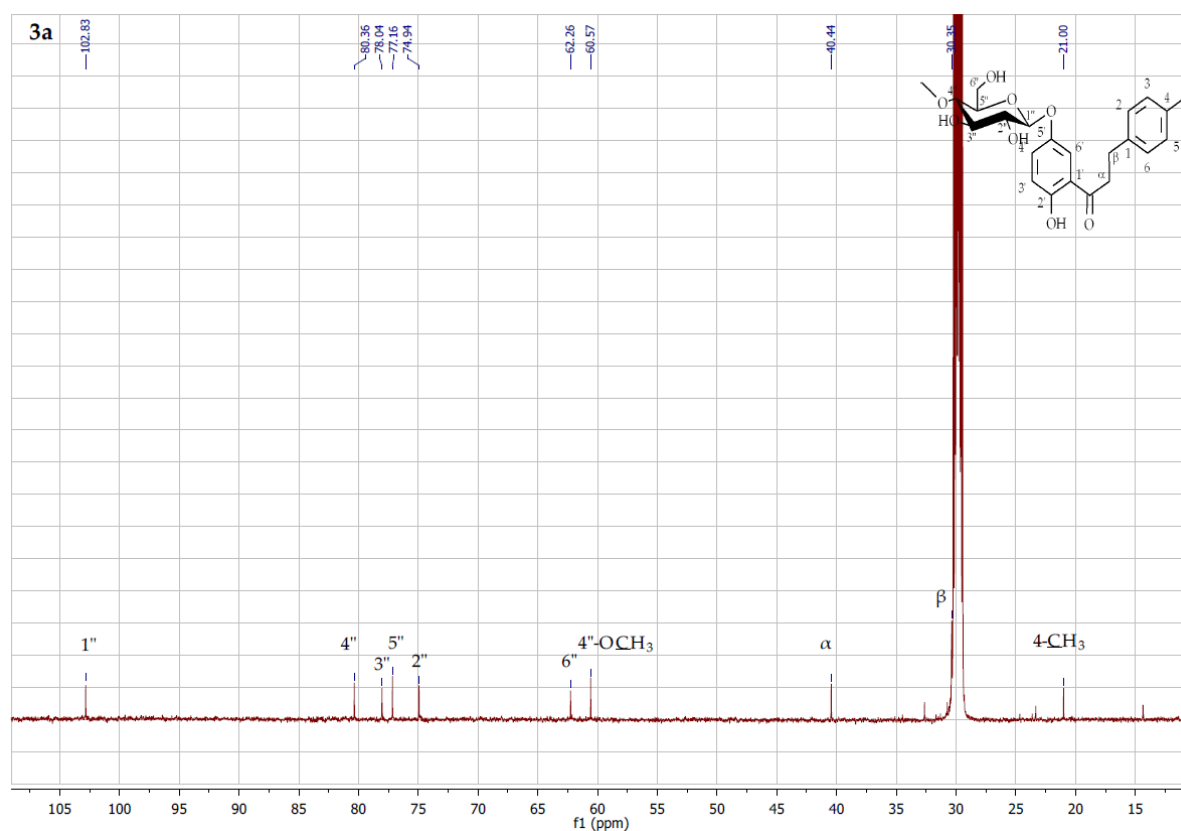

**Figure S27.**  $^{13}\text{C}$  NMR spectrum expansion ( $\delta$ , acetone- $d_6$ , 151 MHz) of 2'-hydroxy-4-methyldihydrochalcone 5'- $O$ - $\beta$ -D-(4''- $O$ -methyl)-glucopyranoside (**3a**)

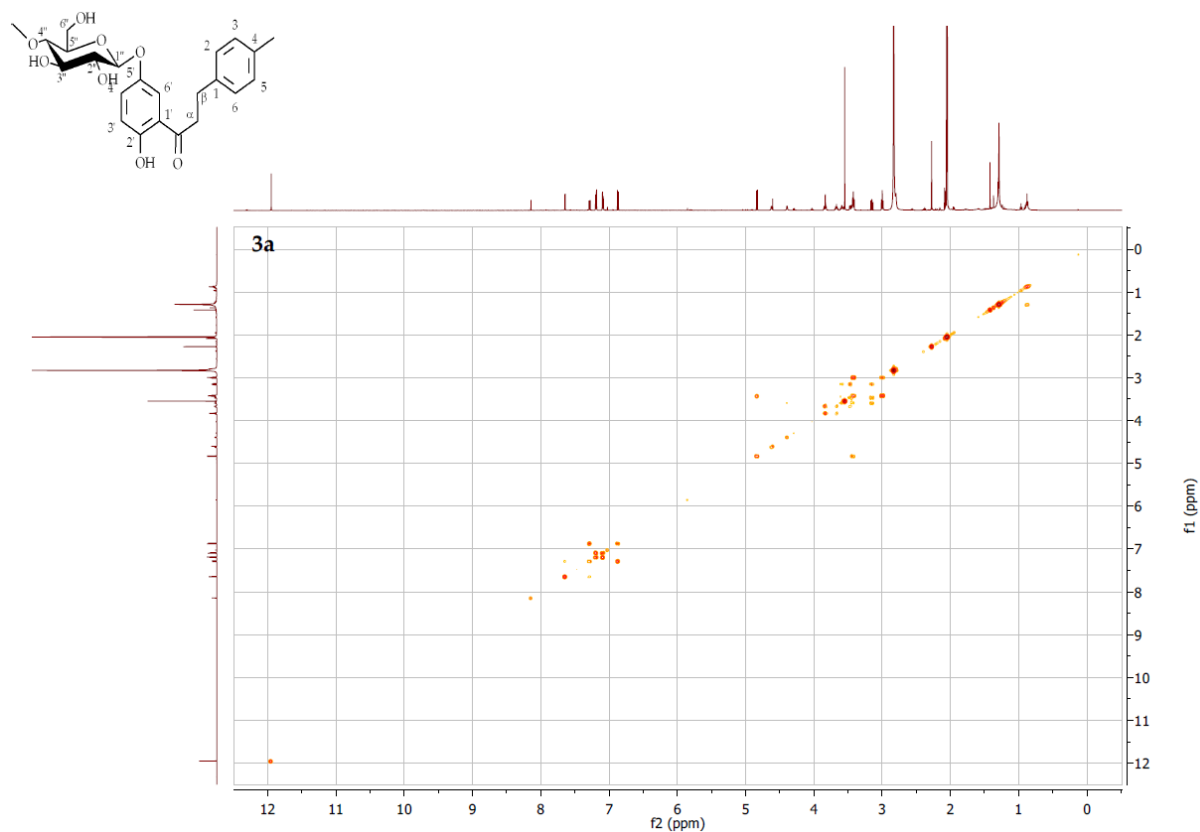

**Figure S28.** COSY contour map –  $^1\text{H} \times ^1\text{H}$  of 2'-hydroxy-4-methyldihydrochalcone 5'-O- $\beta$ -D-(4''-O-methyl)-glucopyranoside (**3a**)

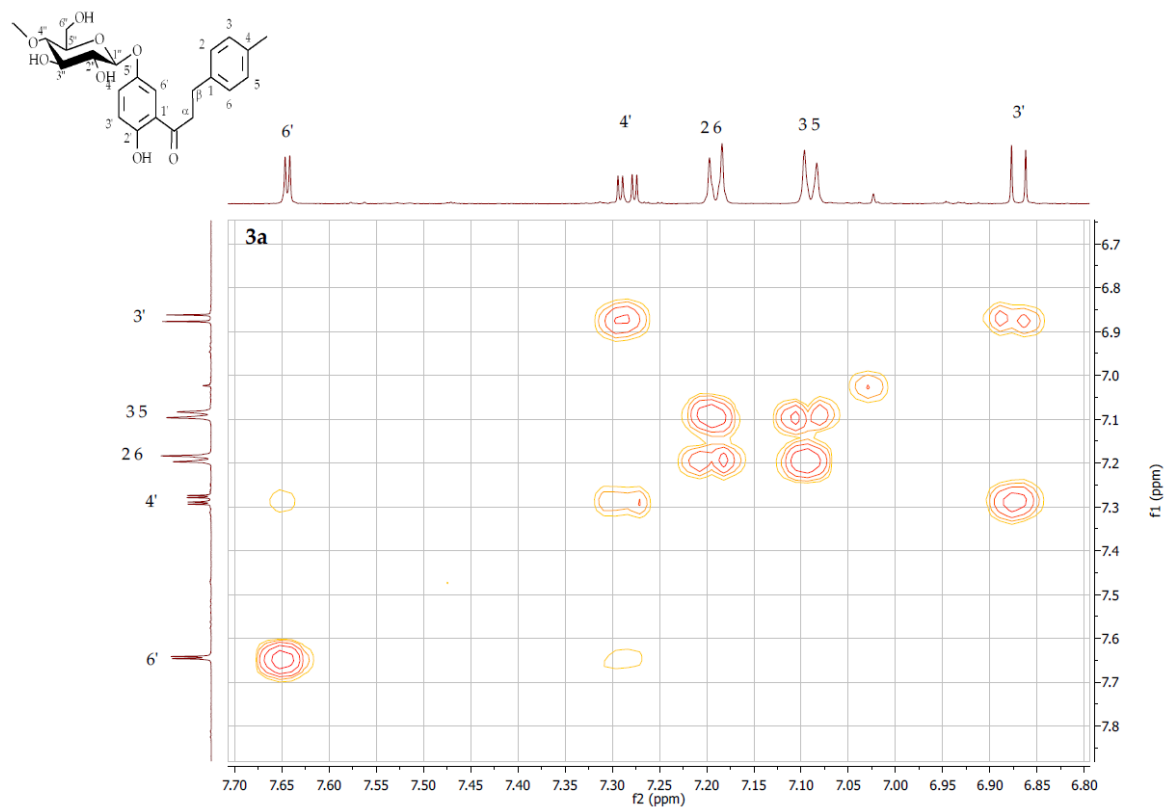

**Figure S29.** COSY contour map –  $^1\text{H} \times ^1\text{H}$  expansion of 2'-hydroxy-4-methyldihydrochalcone 5'-O- $\beta$ -D-(4''-O-methyl)-glucopyranoside (**3a**)

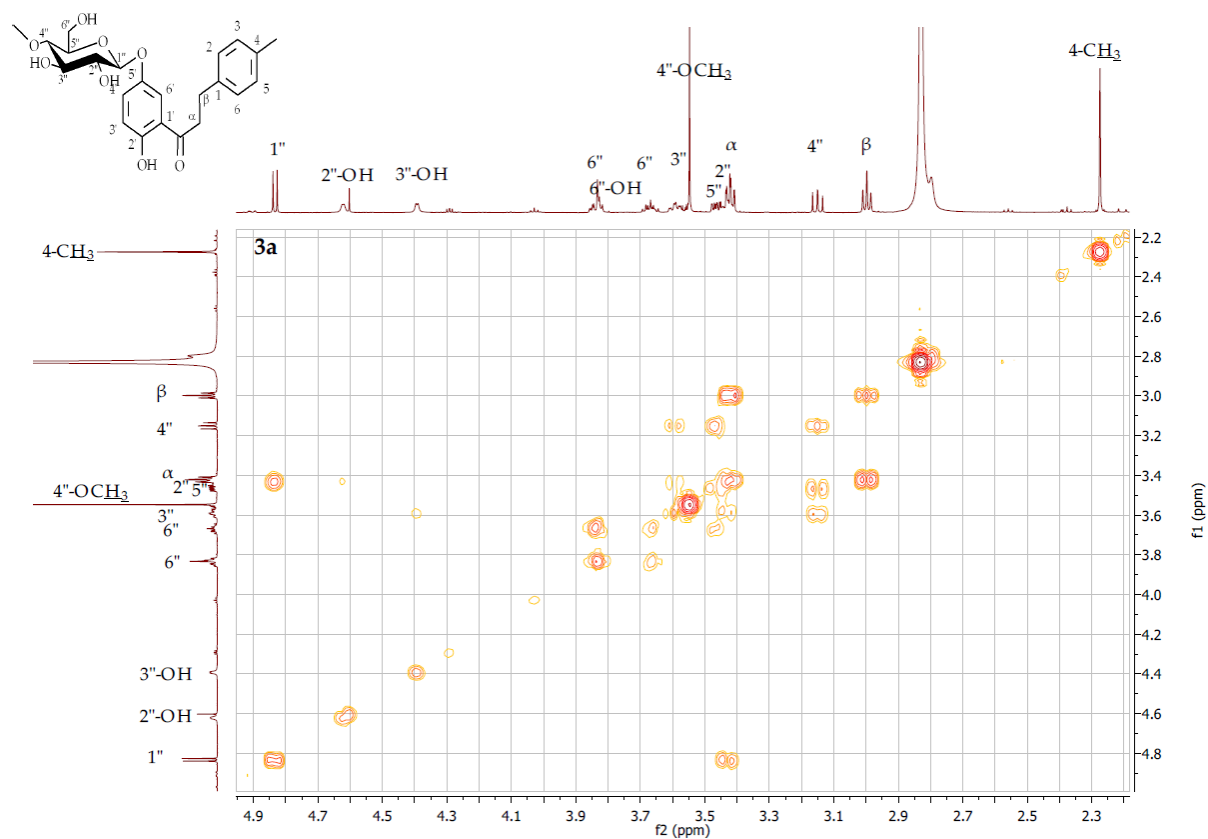

**Figure S30.** COSY contour map –  $^1\text{H} \times ^1\text{H}$  expansion of 2'-hydroxy-4-methyldihydrochalcone 5'-O-β-D-(4''-O-methyl)-glucopyranoside (**3a**)

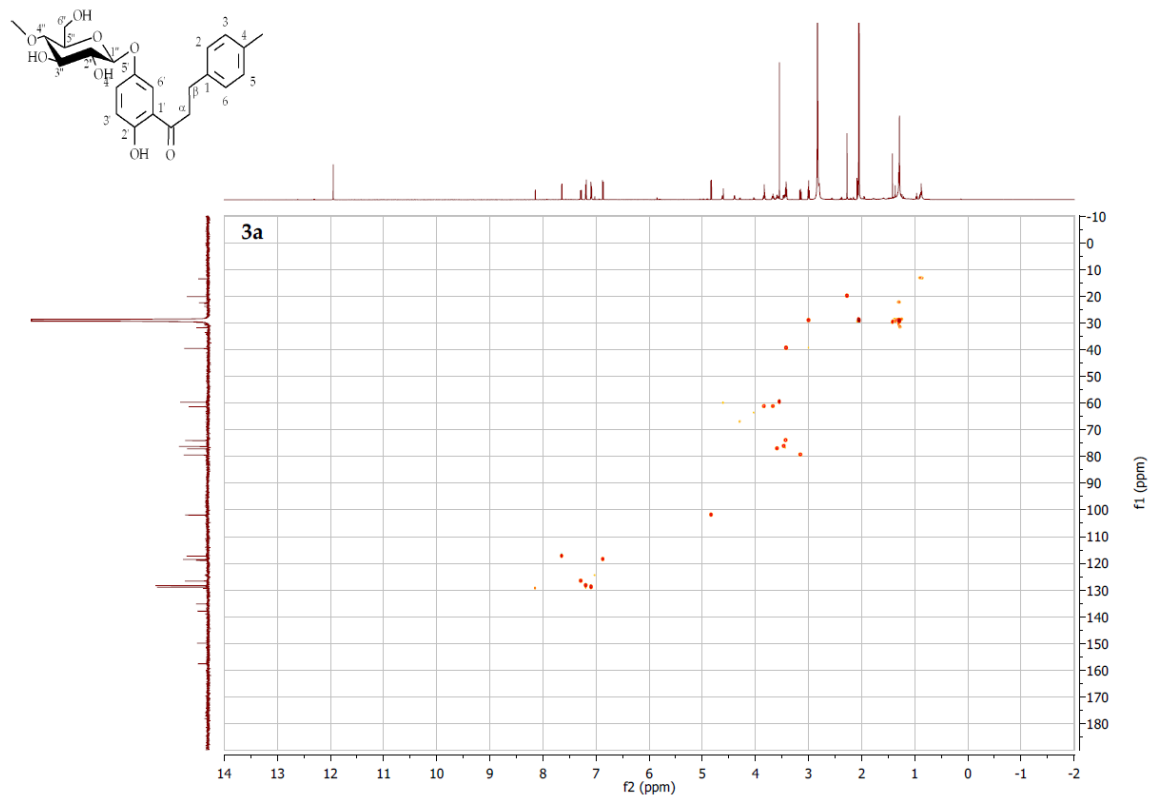

**Figure S31.** HSQC contour map –  $^1\text{H} \times ^{13}\text{C}$  of 2'-hydroxy-4-methyldihydrochalcone 5'-O-β-D-(4''-O-methyl)-glucopyranoside (**3a**)

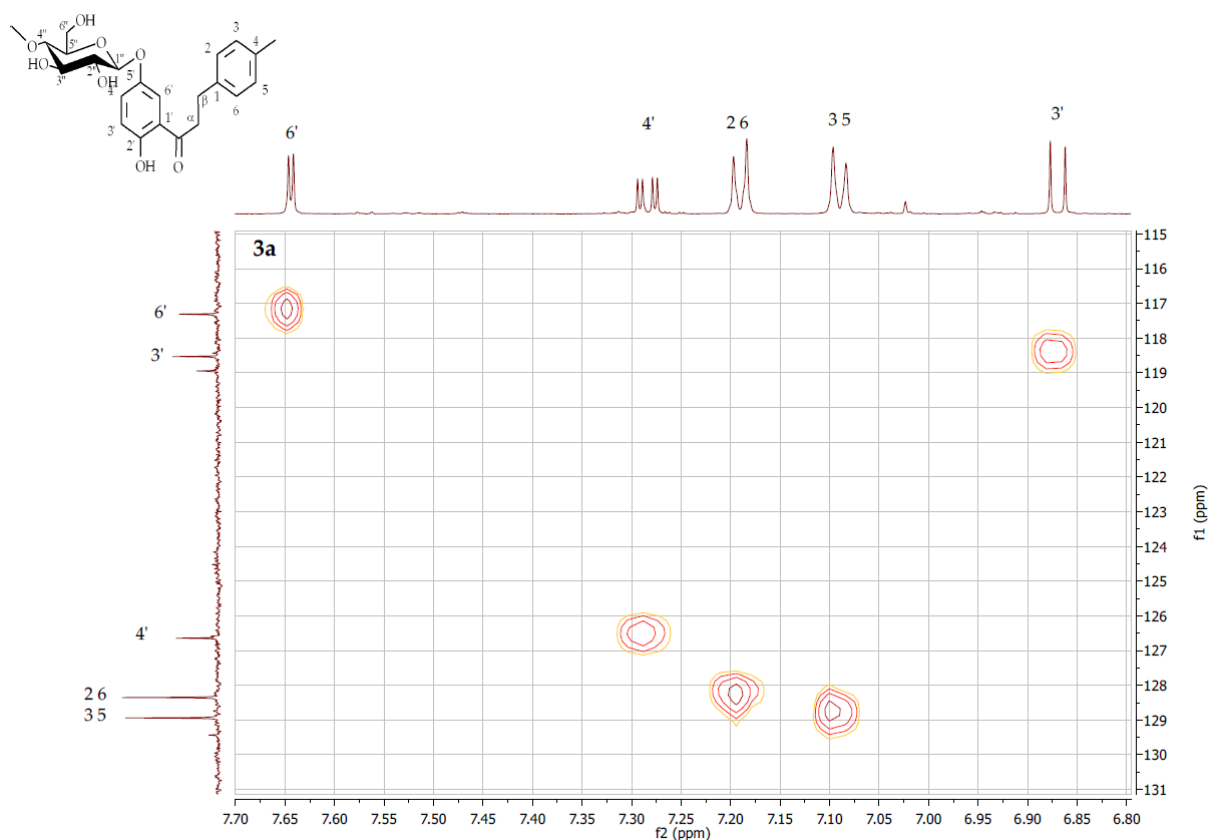

**Figure S32.** HSQC contour map –  $^1\text{H} \times ^{13}\text{C}$  expansion of 2'-hydroxy-4-methyldihydrochalcone 5'-O- $\beta$ -D-(4''-O-methyl)-glucopyranoside (**3a**)

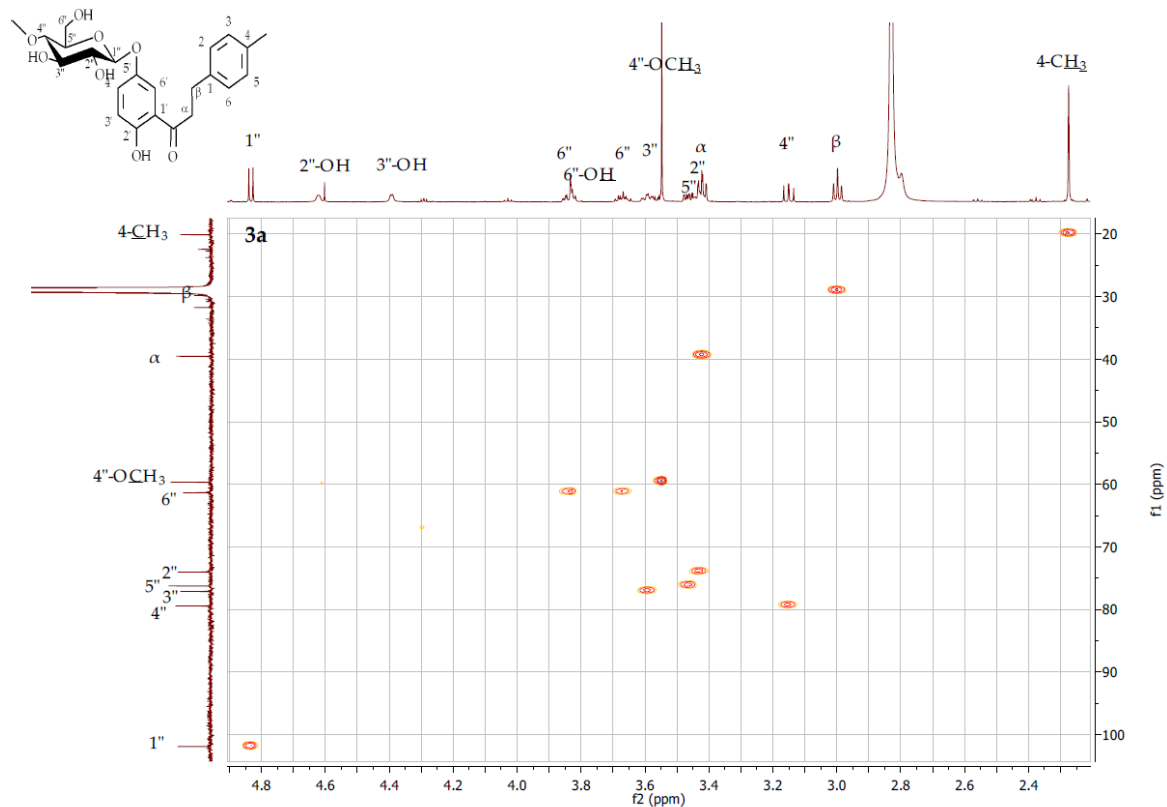

**Figure S33.** HSQC contour map –  $^1\text{H} \times ^{13}\text{C}$  expansion of 2'-hydroxy-4-methyldihydrochalcone 5'-O- $\beta$ -D-(4''-O-methyl)-glucopyranoside (**3a**)

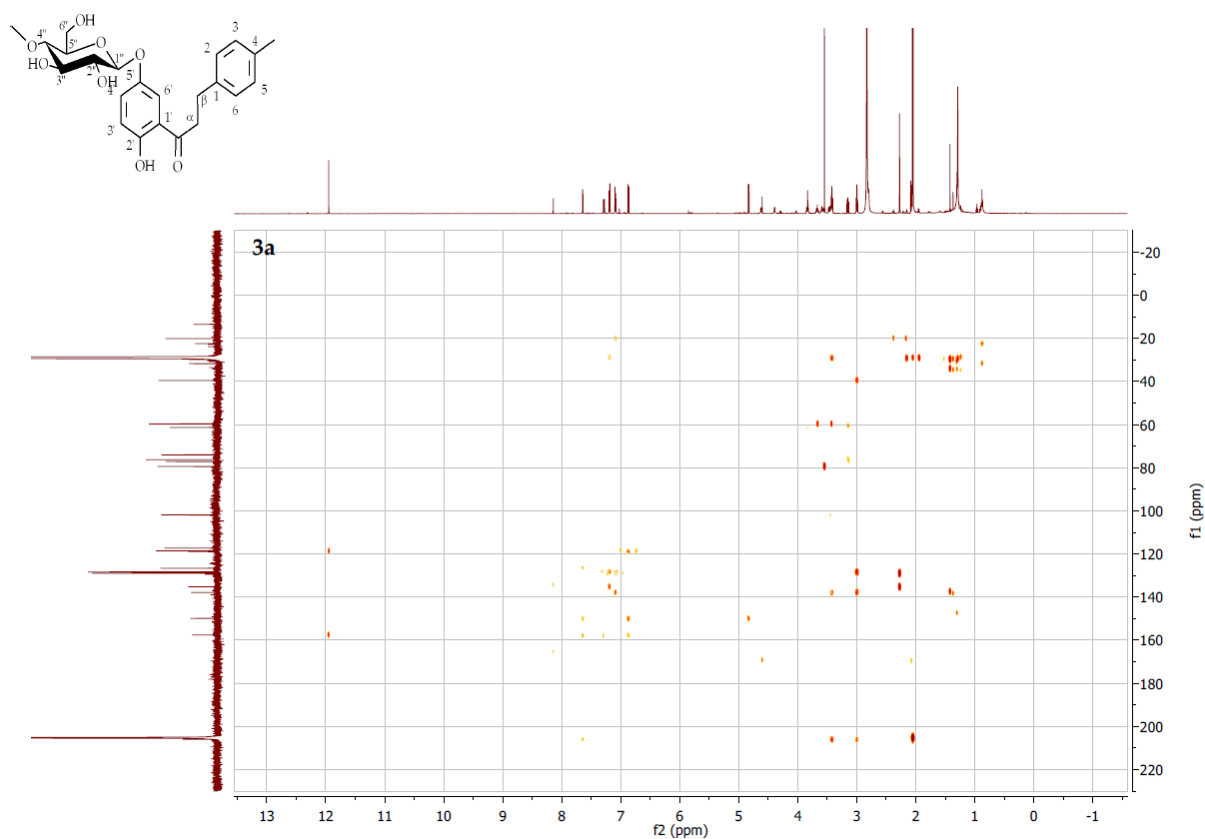

**Figure S34.** HMBC contour map –  $^1\text{H} \times ^{13}\text{C}$  of 2'-hydroxy-4-methyldihydrochalcone 5'-O- $\beta$ -D-(4''-O-methyl)-glucopyranoside (**3a**)

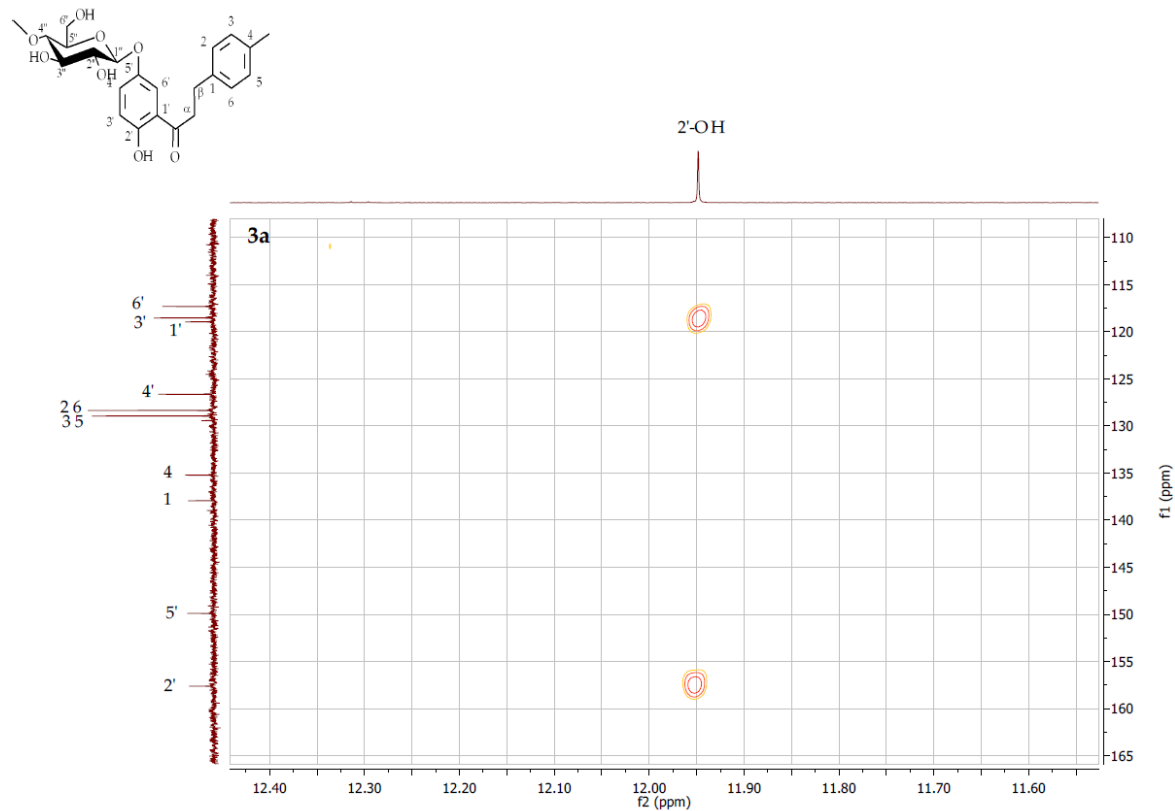

**Figure S35.** HMBC contour map –  $^1\text{H} \times ^{13}\text{C}$  expansion of 2'-hydroxy-4-methyldihydrochalcone 5'-O- $\beta$ -D-(4''-O-methyl)-glucopyranoside (**3a**)

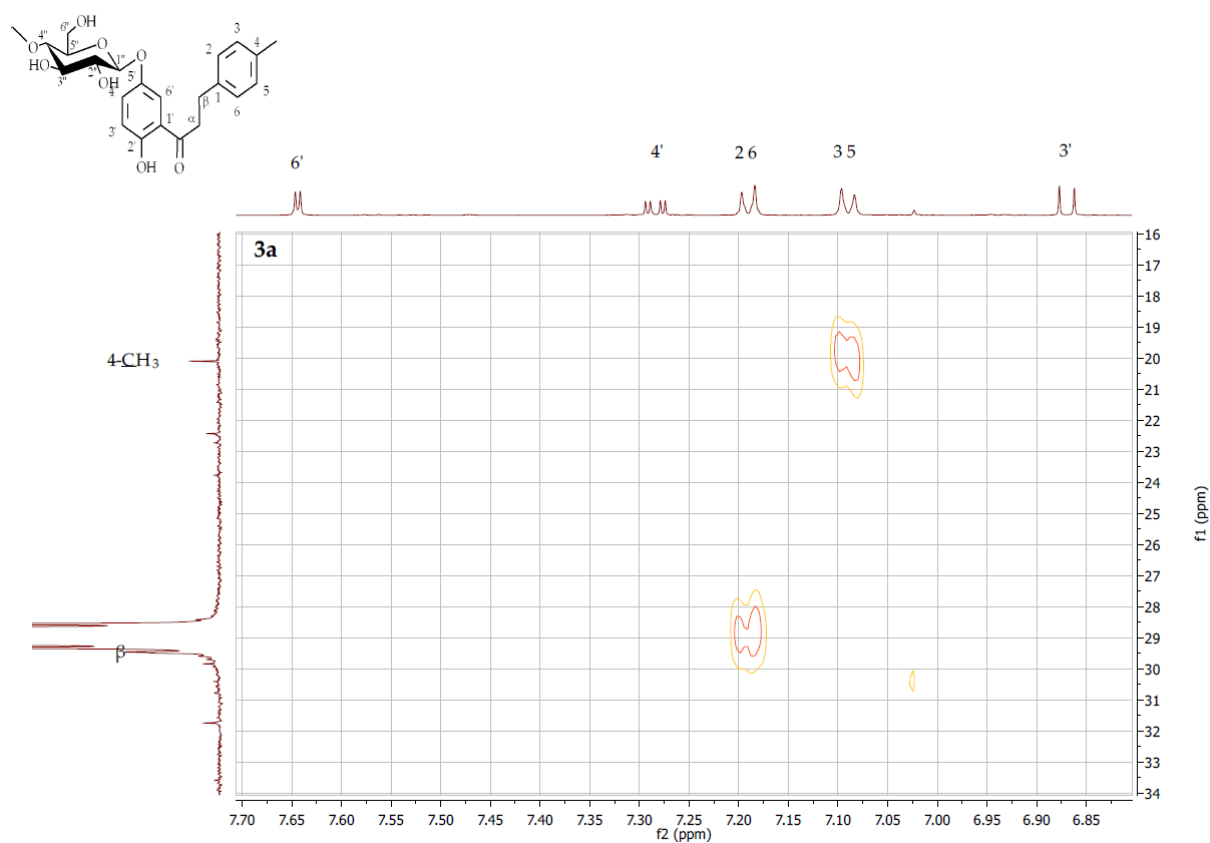

**Figure S36.** HMBC contour map –  $^1\text{H} \times ^{13}\text{C}$  expansion of 2'-hydroxy-4-methyldihydrochalcone 5'-O- $\beta$ -D-(4''-O-methyl)-glucopyranoside (**3a**)

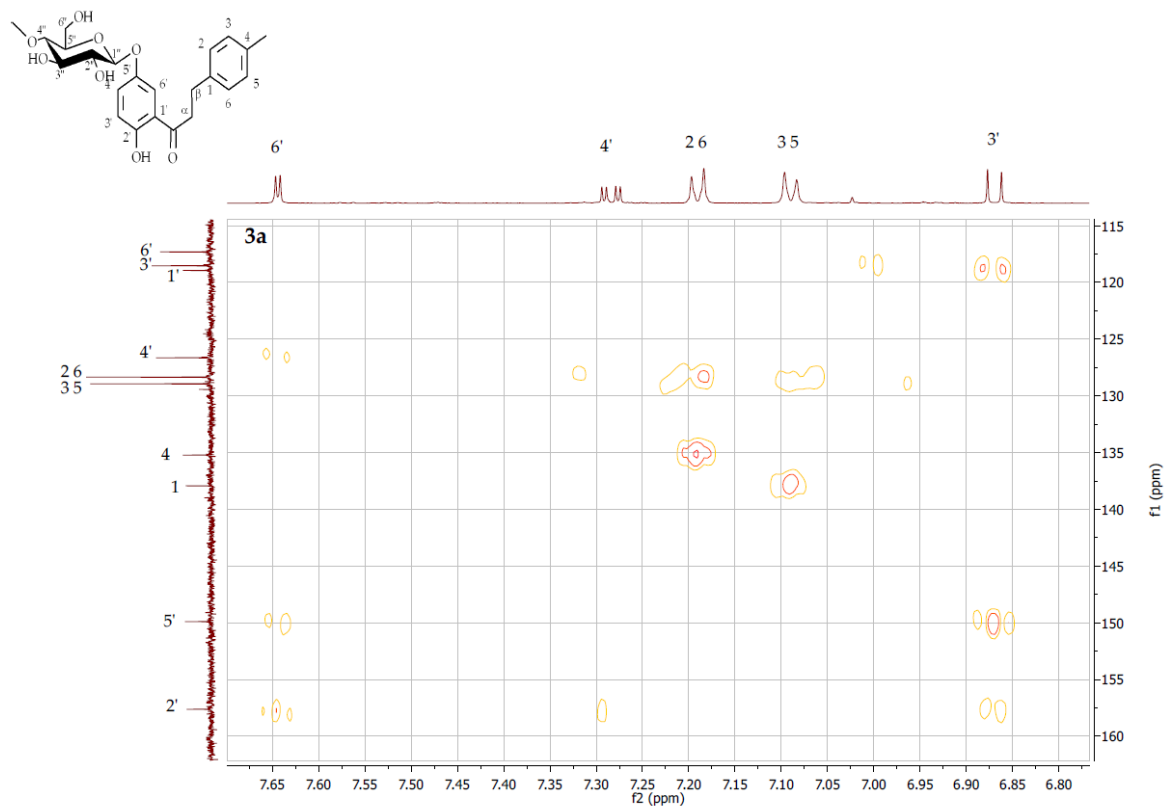

**Figure S37.** HMBC contour map –  $^1\text{H} \times ^{13}\text{C}$  expansion of 2'-hydroxy-4-methyldihydrochalcone 5'-O- $\beta$ -D-(4''-O-methyl)-glucopyranoside (**3a**)

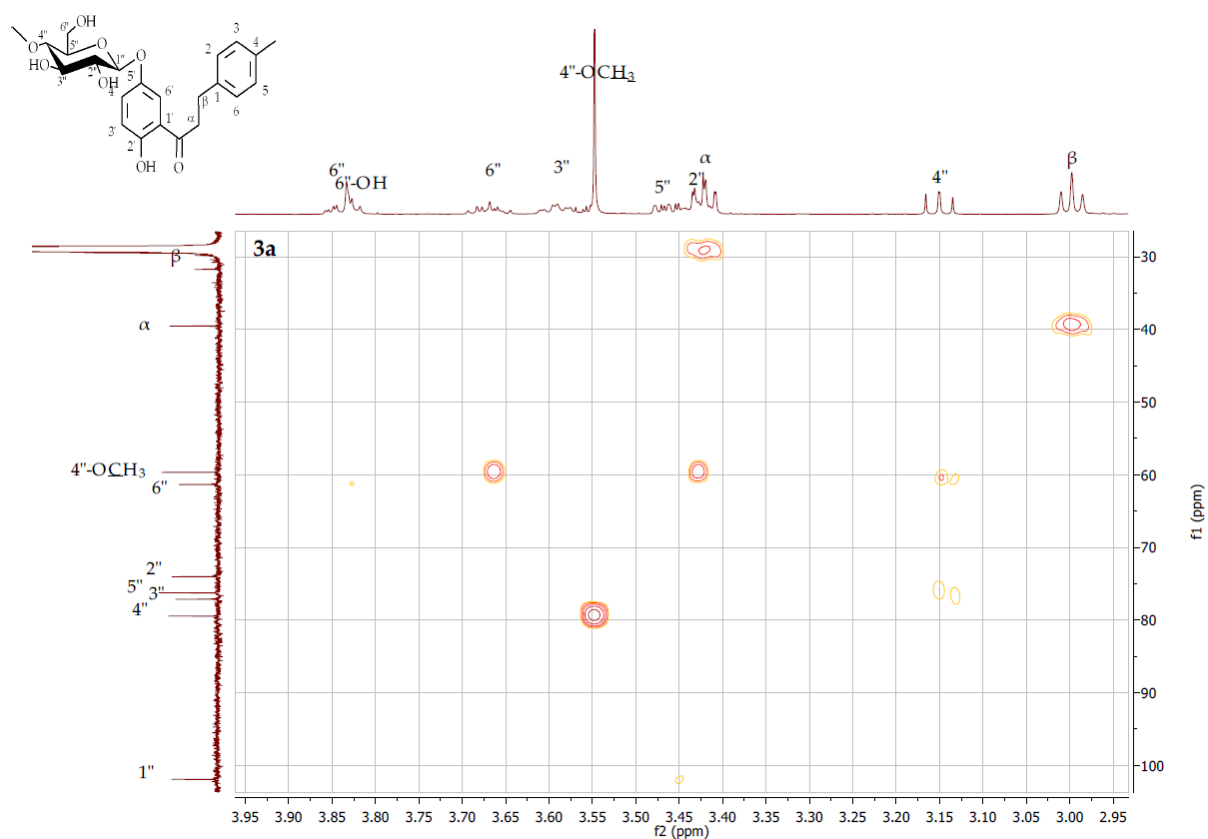

**Figure S38.** HMBC contour map –  $^1\text{H} \times ^{13}\text{C}$  expansion of 2'-hydroxy-4-methyldihydrochalcone 5'-O- $\beta$ -D-(4''-O-methyl)-glucopyranoside (**3a**)

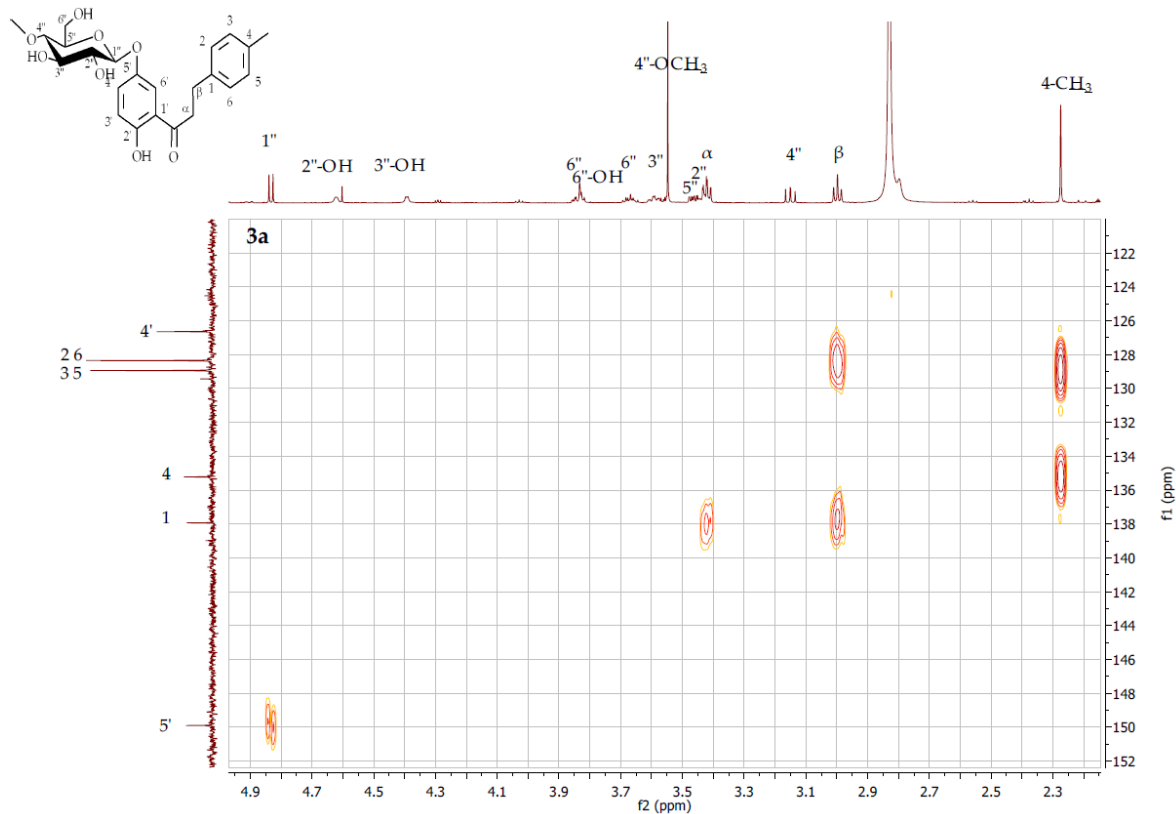

**Figure S39.** HMBC contour map –  $^1\text{H} \times ^{13}\text{C}$  expansion of 2'-hydroxy-4-methyldihydrochalcone 5'-O- $\beta$ -D-(4''-O-methyl)-glucopyranoside (**3a**)



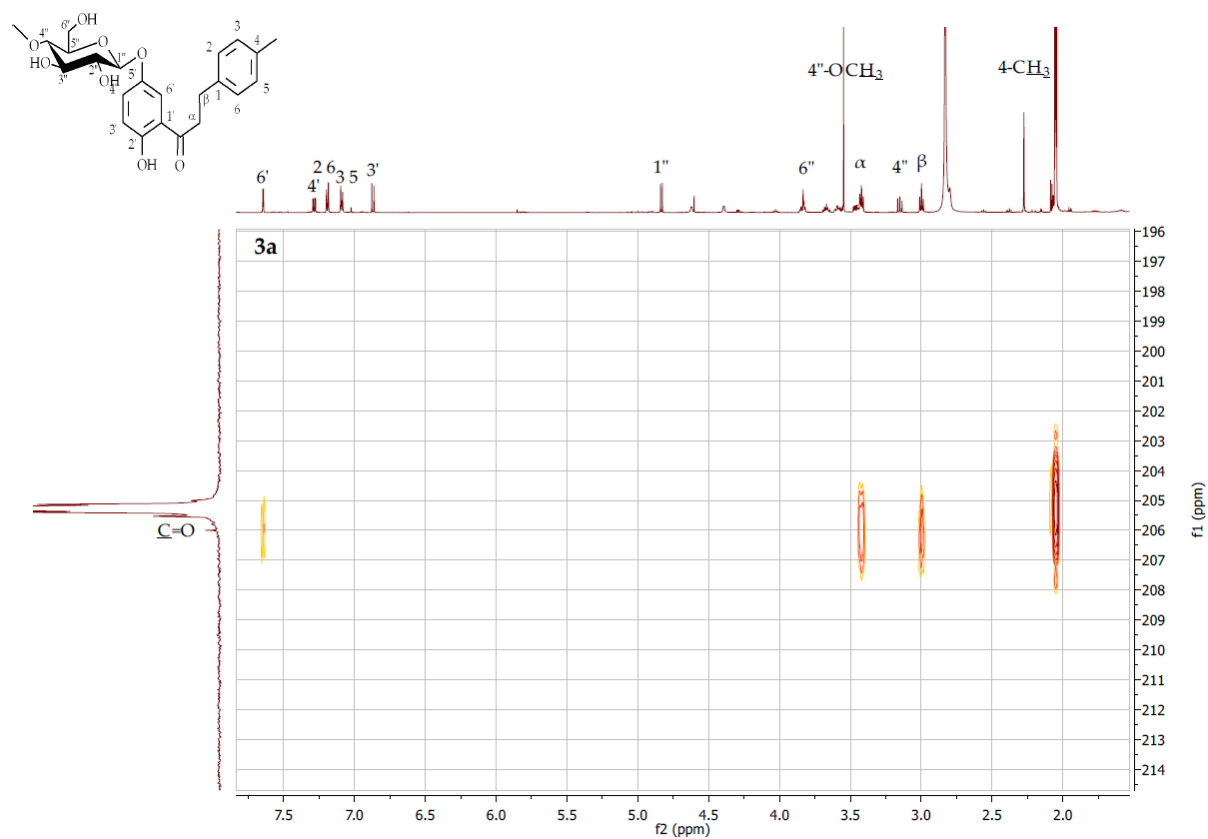

**Figure S40.** HMBC contour map – <sup>1</sup>H × <sup>13</sup>C expansion of 2'-hydroxy-4-methyldihydrochalcone 5'-O-β-D-(4''-O-methyl)-glucopyranoside (3a)

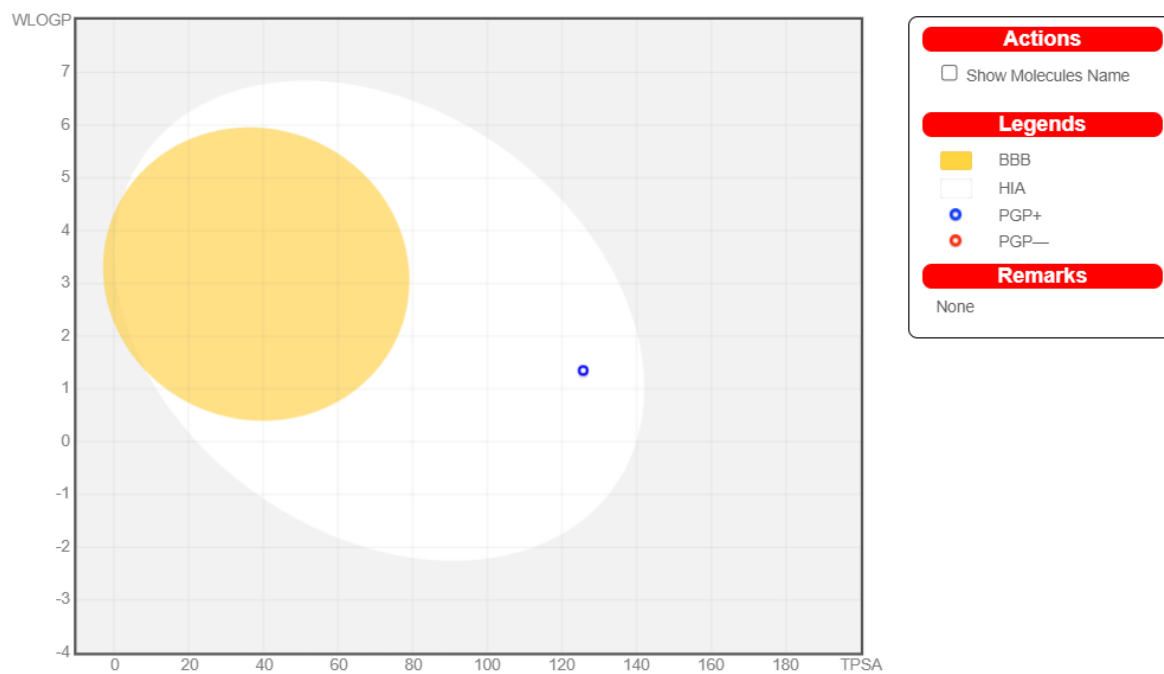

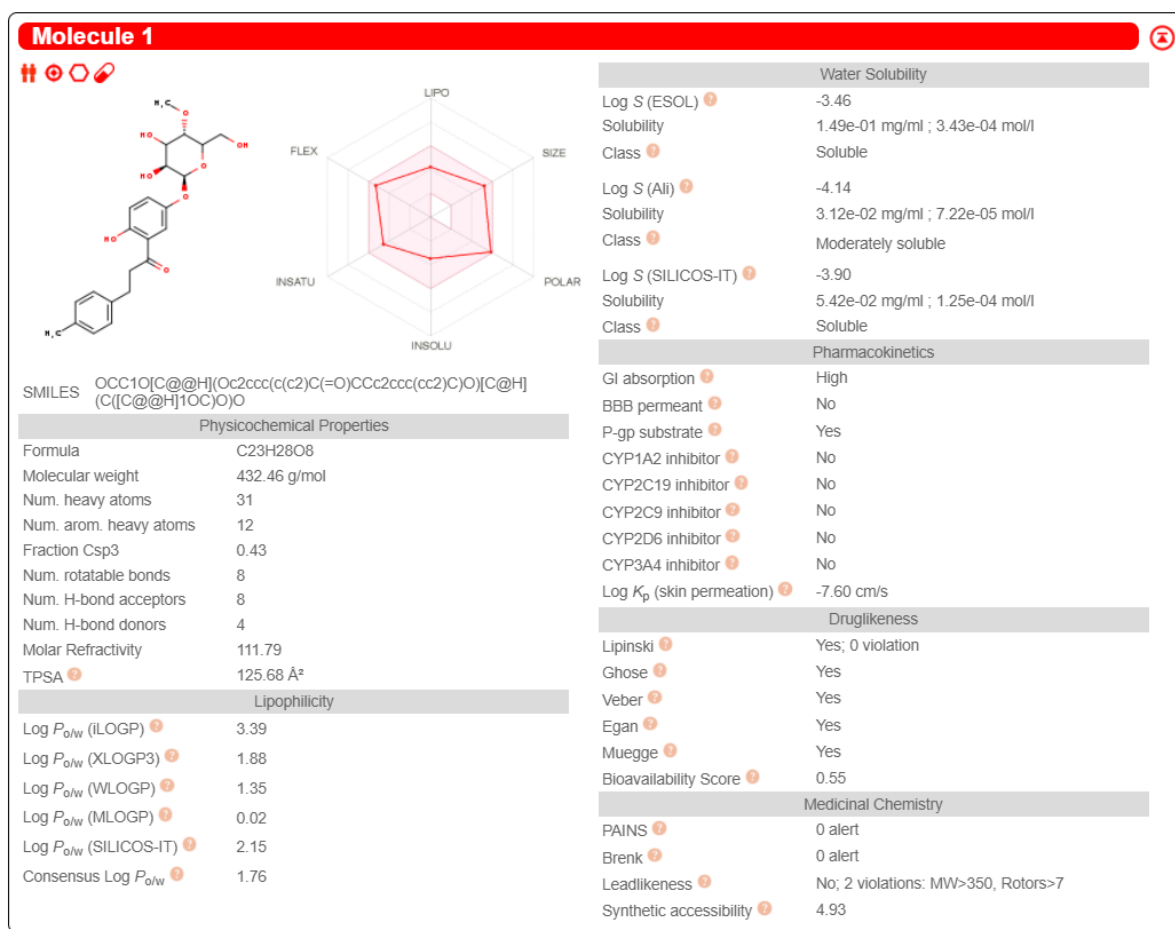

**Figure S41.** 2'-Hydroxy-4-methyldihydrochalcone 5'-O- $\beta$ -D-(4''-O-methyl)-glucopyranoside (**3a**) physicochemical and ADME parameters prediction using the SwissADME modelling

| Pa    | Pi    | Activity                                         |
|-------|-------|--------------------------------------------------|
| 0,935 | 0,005 | CDP-glycerol glycerophosphotransferase inhibitor |
| 0,931 | 0,002 | Monophenol monooxygenase inhibitor               |
| 0,925 | 0,002 | 3-Phytase inhibitor                              |
| 0,901 | 0,004 | Antiinfective                                    |
| 0,896 | 0,002 | Lactase inhibitor                                |
| 0,883 | 0,015 | Membrane integrity agonist                       |
| 0,851 | 0,004 | Anticarcinogenic                                 |
| 0,836 | 0,003 | Hepatoprotectant                                 |
| 0,838 | 0,008 | Anaphylatoxin receptor antagonist                |
| 0,830 | 0,002 | Neurotrophic factor enhancer                     |

**Figure S42.** 2'-Hydroxy-4-methyldihydrochalcone 5'-O- $\beta$ -D-(4''-O-methyl)-glucopyranoside (**3a**) biological activity prediction using the Way2Drug Pass online modelling

| Name                                                 | Confidence | ChEMBL ID                     |
|------------------------------------------------------|------------|-------------------------------|
| Clostridium ramosum                                  | 0.6506     | <a href="#">CHEMBL614971</a>  |
| Actinomyces meyeri                                   | 0.6011     | <a href="#">CHEMBL612289</a>  |
| RESISTANT Acinetobacter pittii                       | 0.5872     | <a href="#">CHEMBL3140321</a> |
| Clostridium cadaveris                                | 0.5690     | <a href="#">CHEMBL614970</a>  |
| RESISTANT Mycobacterium ulcerans                     | 0.5659     | <a href="#">CHEMBL612965</a>  |
| Mycobacterium mageritense                            | 0.5658     | <a href="#">CHEMBL612959</a>  |
| Yersinia pestis                                      | 0.5140     | <a href="#">CHEMBL614597</a>  |
| RESISTANT Staphylococcus aureus subsp. aureus RN4220 | 0.4679     | <a href="#">CHEMBL2366906</a> |
| Staphylococcus lugdunensis                           | 0.4609     | <a href="#">CHEMBL613303</a>  |
| Lactobacillus plantarum                              | 0.4426     | <a href="#">CHEMBL614973</a>  |
| Nocardia transvalensis                               | 0.4244     | <a href="#">CHEMBL613234</a>  |
| Clostridium sordellii                                | 0.4145     | <a href="#">CHEMBL613072</a>  |
| Streptococcus sanguinis                              | 0.4078     | <a href="#">CHEMBL612314</a>  |
| Streptococcus oralis                                 | 0.3993     | <a href="#">CHEMBL613305</a>  |
| RESISTANT Chlamydia trachomatis                      | 0.3883     | <a href="#">CHEMBL614606</a>  |

**Figure S43.** 2'-Hydroxy-4-methyldihydrochalcone 5'-O- $\beta$ -D-(4''-O-methyl)-glucopyranoside (**3a**) antibacterial activity prediction using the Way2Drug AntiBac-Pred modelling

| Name                        | Confidence | ChEMBL ID                    |
|-----------------------------|------------|------------------------------|
| Rhizopus oryzae             | 0.4467     | <a href="#">CHEMBL612306</a> |
| Trichophyton mentagrophytes | 0.3920     | <a href="#">CHEMBL613162</a> |
| Absidia corymbifera         | 0.3831     | <a href="#">CHEMBL612369</a> |
| Saccharomyces cerevisiae    | 0.1941     | <a href="#">CHEMBL361</a>    |
| Aspergillus niger           | 0.1738     | <a href="#">CHEMBL358</a>    |
| Epidermophyton floccosum    | 0.1567     | <a href="#">CHEMBL612386</a> |
| Mucor                       | 0.1250     | <a href="#">CHEMBL612521</a> |
| Penicillium marneffei       | 0.0903     | <a href="#">CHEMBL612994</a> |
| Trichosporon asahii         | 0.0586     | <a href="#">CHEMBL613164</a> |
| Mucor hiemalis              | 0.0584     | <a href="#">CHEMBL612949</a> |
| Galactomyces geotrichum     | 0.0355     | <a href="#">CHEMBL613775</a> |
| Candida rugosa              | 0.0283     | <a href="#">CHEMBL612669</a> |

**Figure S44.** 2'-Hydroxy-4-methyldihydrochalcone 5'-O- $\beta$ -D-(4''-O-methyl)-glucopyranoside (**3a**) antifungal activity prediction using the Way2Drug AntiFun-Pred modelling

| Virus                                                               | Protein target                                | Confidence |
|---------------------------------------------------------------------|-----------------------------------------------|------------|
| Severe acute respiratory syndrome coronavirus 2                     | Replicase polyprotein 1ab                     | 0.8116     |
| Human immunodeficiency virus 2                                      | Human immunodeficiency virus type 2 integrase | 0.0461     |
| Varicella-zoster virus (strain Dumas) (HHV-3) (Human herpesvirus 3) | Thymidine kinase                              | 0.0090     |

**Figure S45.** 2'-Hydroxy-4-methyldihydrochalcone 5'-O- $\beta$ -D-(4''-O-methyl)-glucopyranoside (**3a**) antiviral activity prediction using the Way2Drug AntiVir-Pred modelling

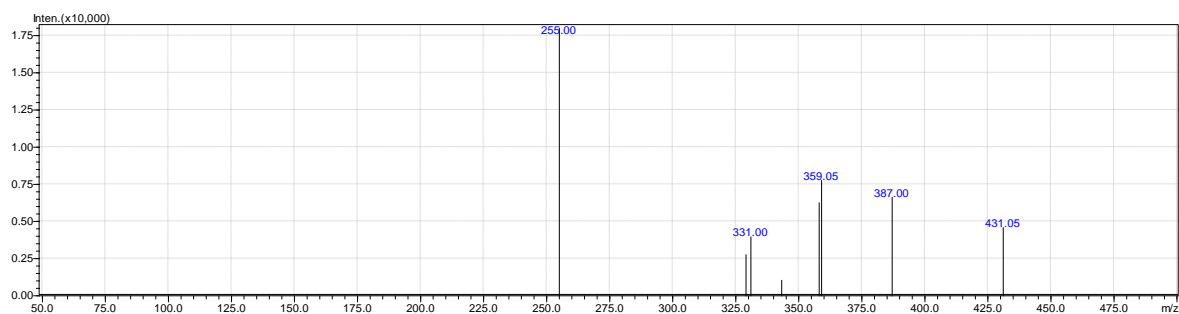

**Figure S46.** MS analysis 4-hydroxymethyldihydrochalcone 2'-O-β-D-(4''-O-methyl)-glucopyranoside (**3b**)

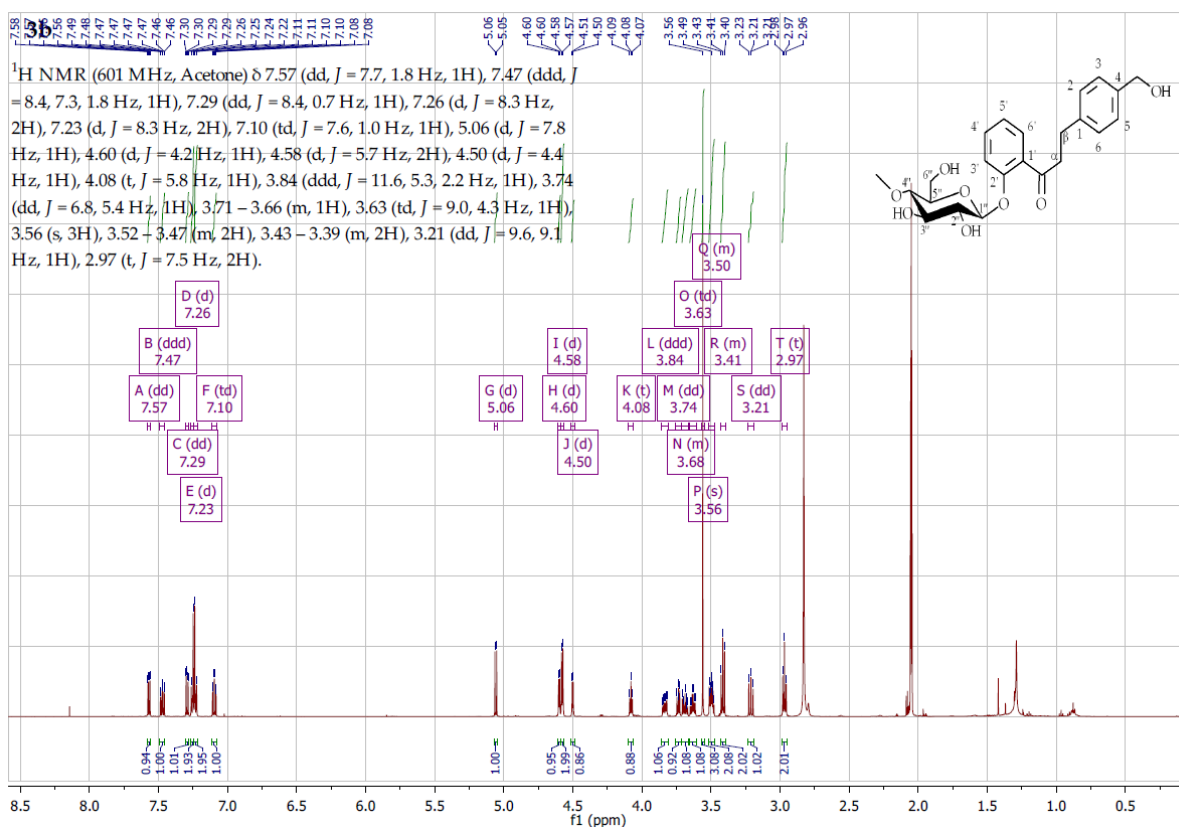

**Figure S47.** <sup>1</sup>H NMR spectrum (δ, acetone-d<sub>6</sub>, 600 MHz) of 4-hydroxymethyldihydrochalcone 2'-O-β-D-(4''-O-methyl)-glucopyranoside (**3b**)

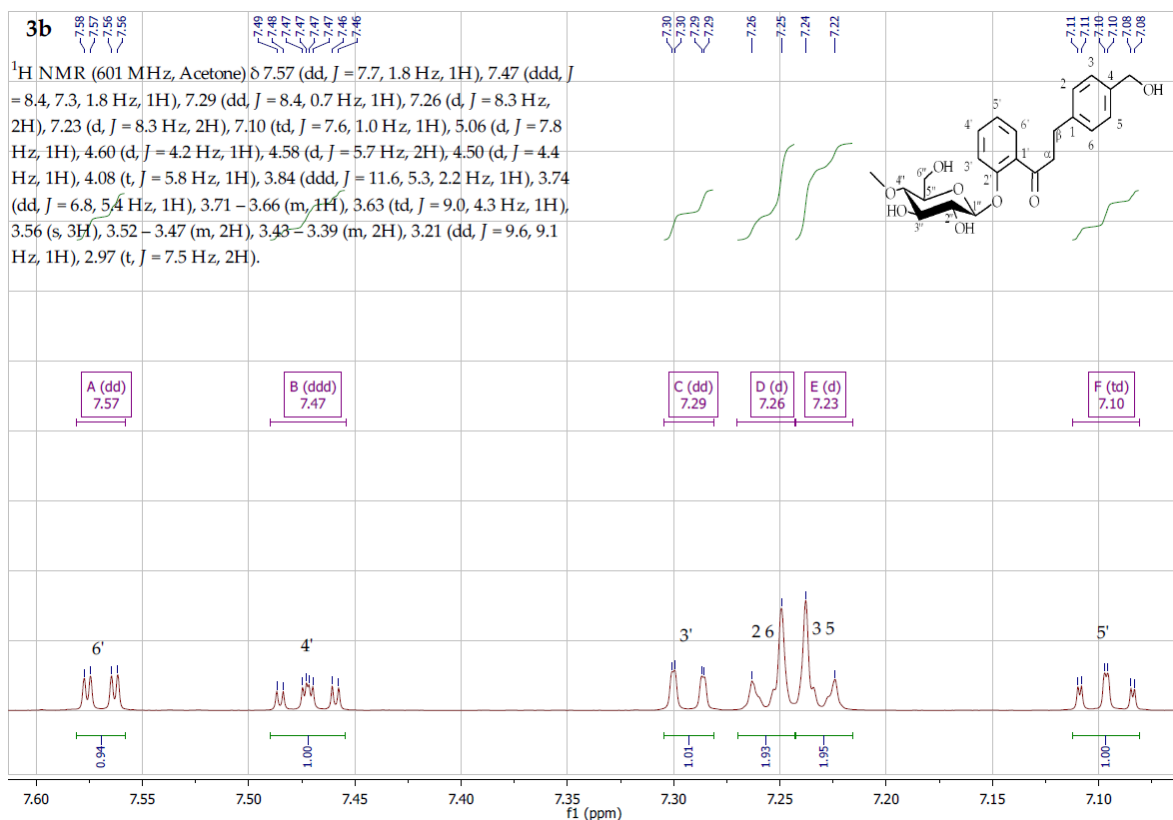

**Figure S48.** <sup>1</sup>H NMR spectrum expansion (δ, acetone-d<sub>6</sub>, 600 MHz) of 4-hydroxymethyldihydrochalcone 2'-*O*-β-D-(4''-*O*-methyl)-glucopyranoside (**3b**)

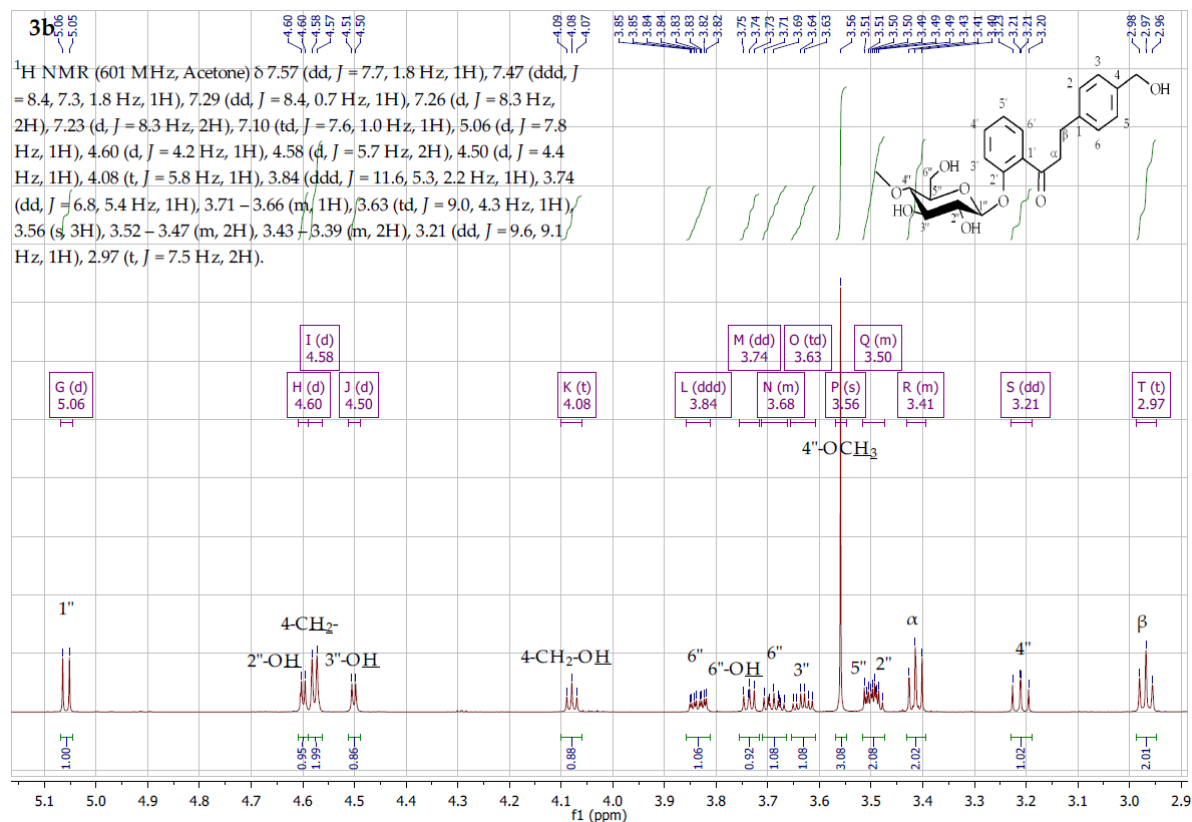

**Figure S49.** <sup>1</sup>H NMR spectrum expansion (δ, acetone-d<sub>6</sub>, 600 MHz) of 4-hydroxymethyldihydrochalcone 2'-*O*-β-D-(4''-*O*-methyl)-glucopyranoside (**3b**)

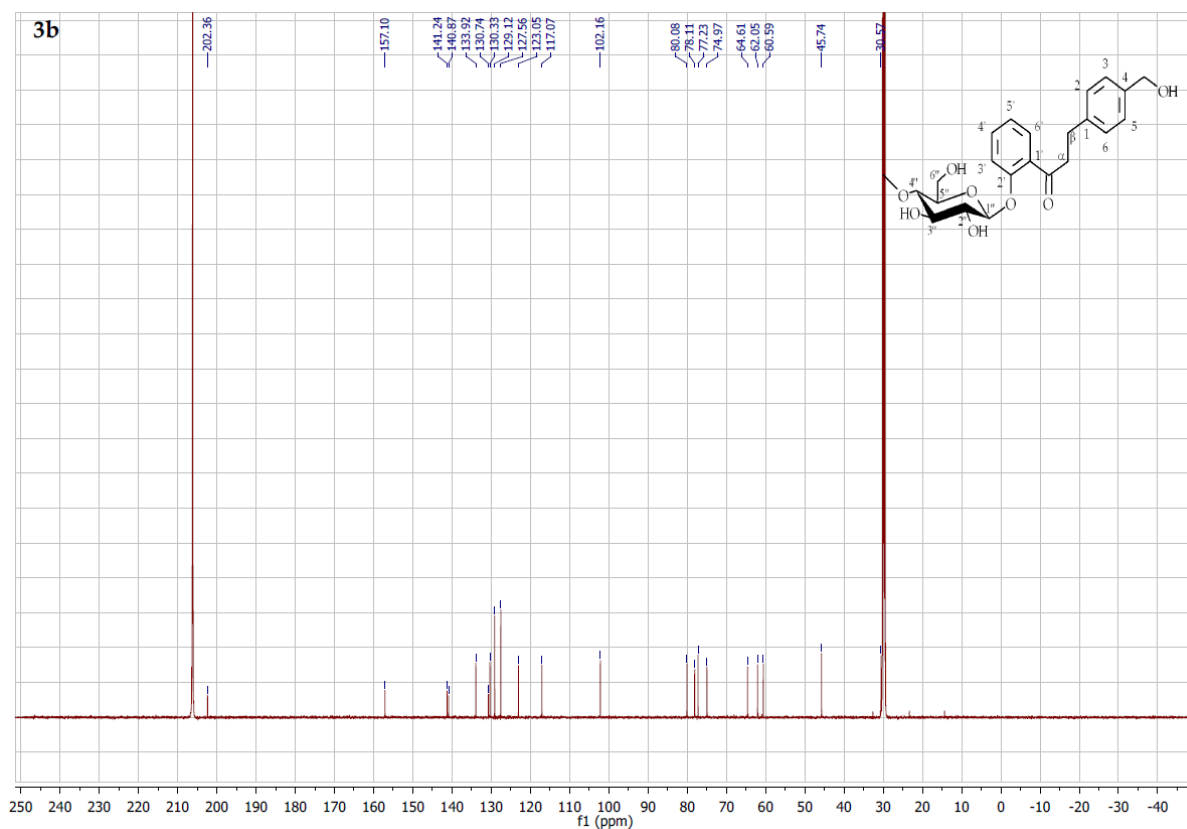

**Figure S50.**  $^{13}\text{C}$  NMR spectrum expansion ( $\delta$ , acetone- $\text{d}_6$ , 151 MHz) of 4-hydroxymethyldihydrochalcone 2'- $O$ - $\beta$ -D-(4''- $O$ -methyl)-glucopyranoside (**3b**)

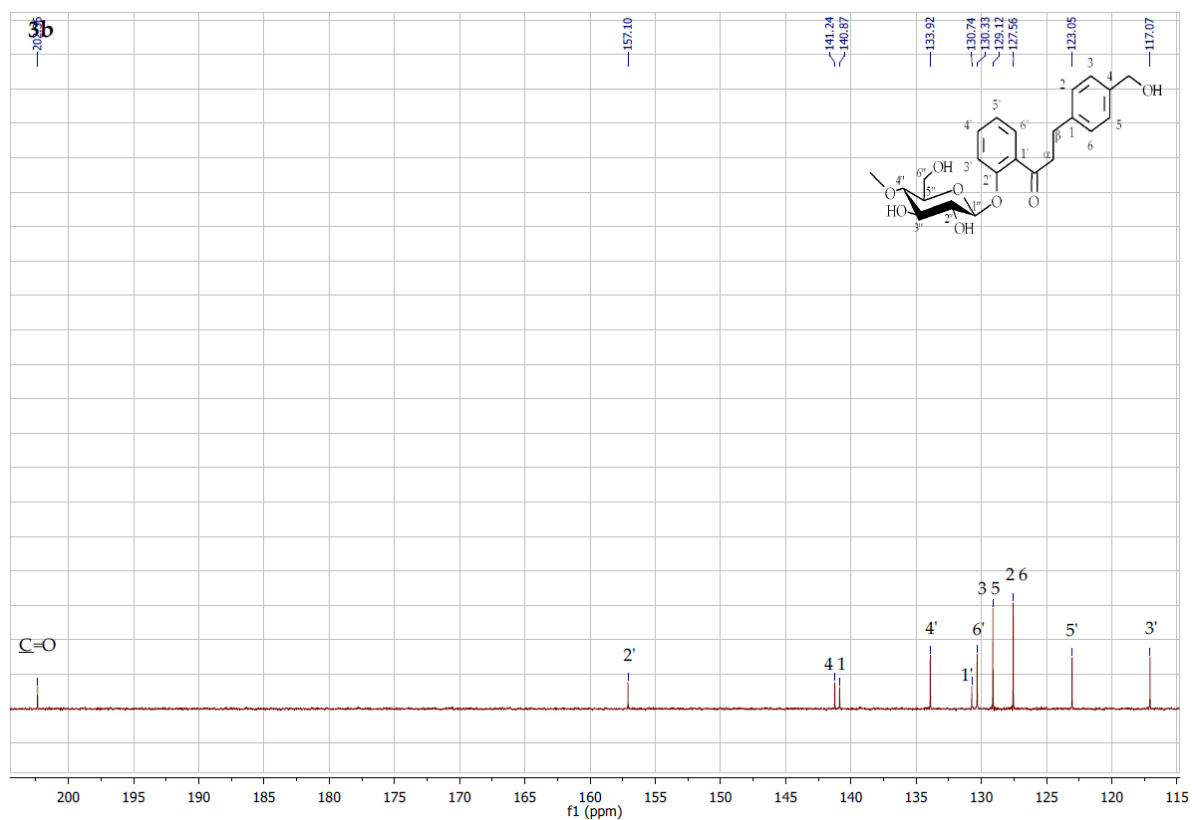

**Figure S51.**  $^{13}\text{C}$  NMR spectrum expansion ( $\delta$ , acetone- $\text{d}_6$ , 151 MHz) of 4-hydroxymethyldihydrochalcone 2'- $O$ - $\beta$ -D-(4''- $O$ -methyl)-glucopyranoside (**3b**)

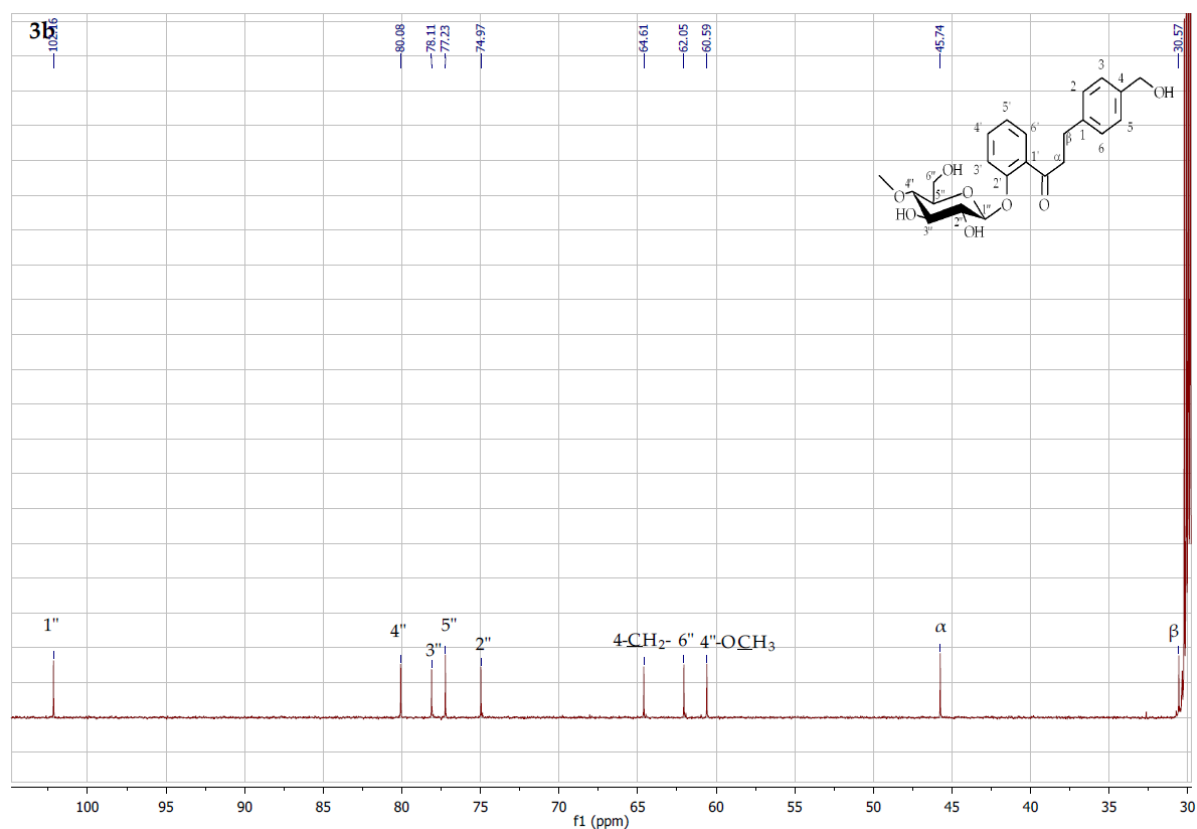

**Figure S52.**  $^{13}\text{C}$  NMR spectrum expansion ( $\delta$ , acetone- $d_6$ , 151 MHz) of 4-hydroxymethyldihydrochalcone 2'- $O$ - $\beta$ -D-(4''- $O$ -methyl)-glucopyranoside (**3b**)

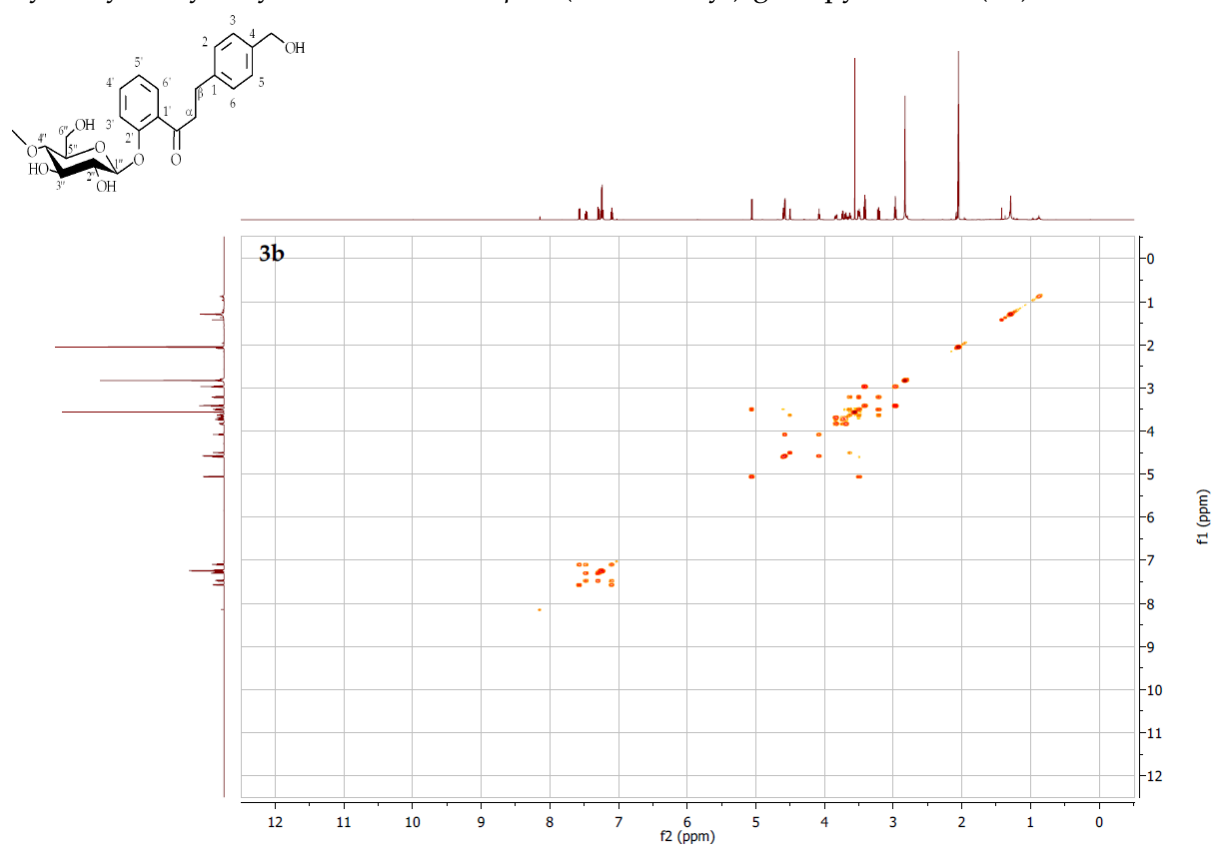

**Figure S53.** COSY contour map –  $^1\text{H} \times ^1\text{H}$  of 4-hydroxymethyldihydrochalcone 2'- $O$ - $\beta$ -D-(4''- $O$ -methyl)-glucopyranoside (**3b**)

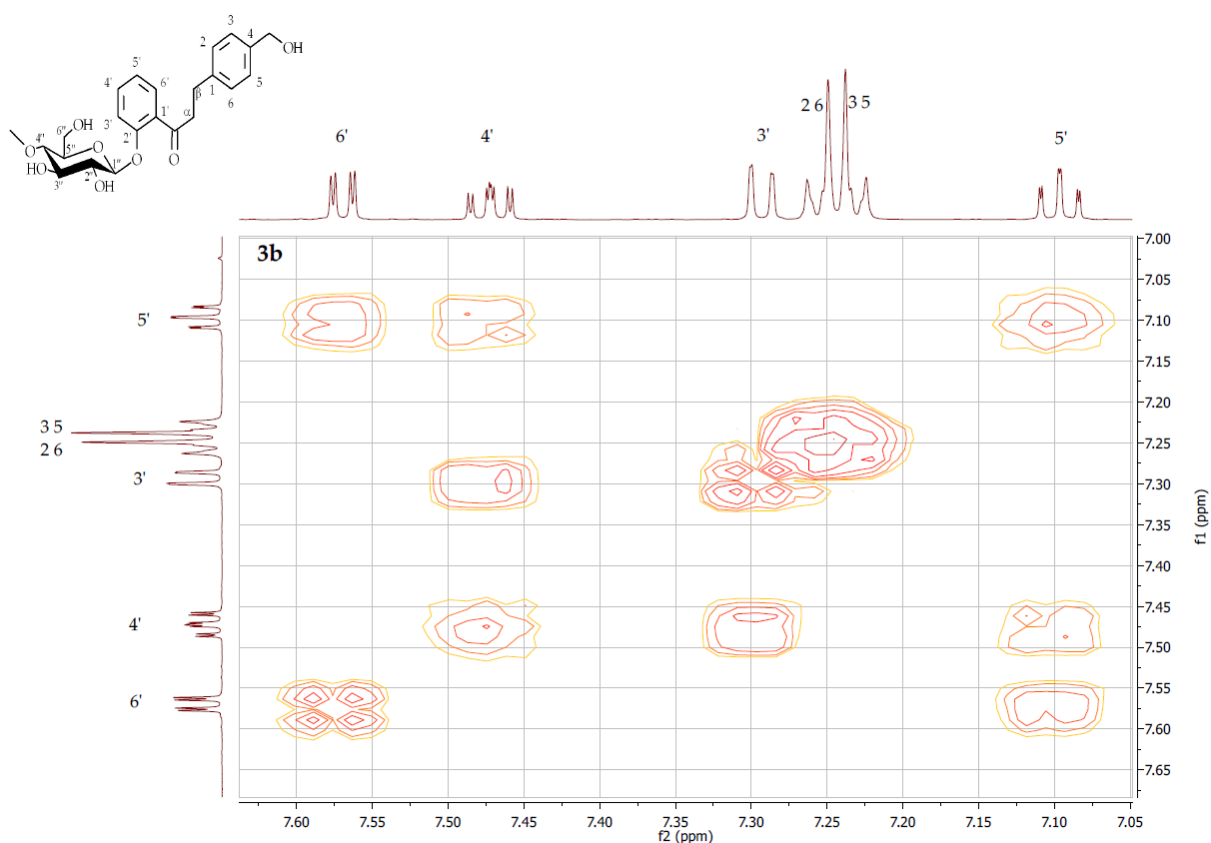

**Figure S54.** COSY contour map –  $^1\text{H} \times ^1\text{H}$  expansion of 4-hydroxymethyldihydrochalcone 2'-*O*- $\beta$ -D-(4''-*O*-methyl)-glucopyranoside (**3b**)

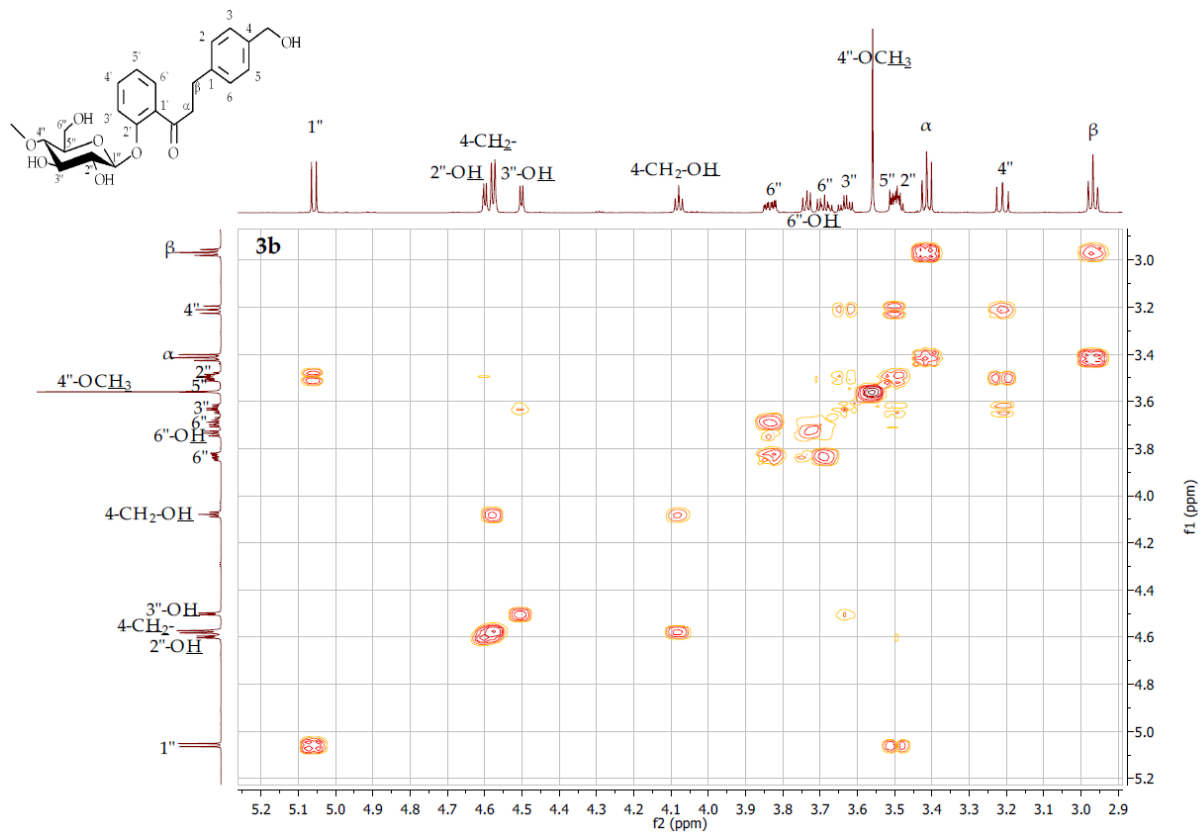

**Figure S55.** COSY contour map –  $^1\text{H} \times ^1\text{H}$  expansion of 4-hydroxymethyldihydrochalcone 2'-*O*- $\beta$ -D-(4''-*O*-methyl)-glucopyranoside (**3b**)



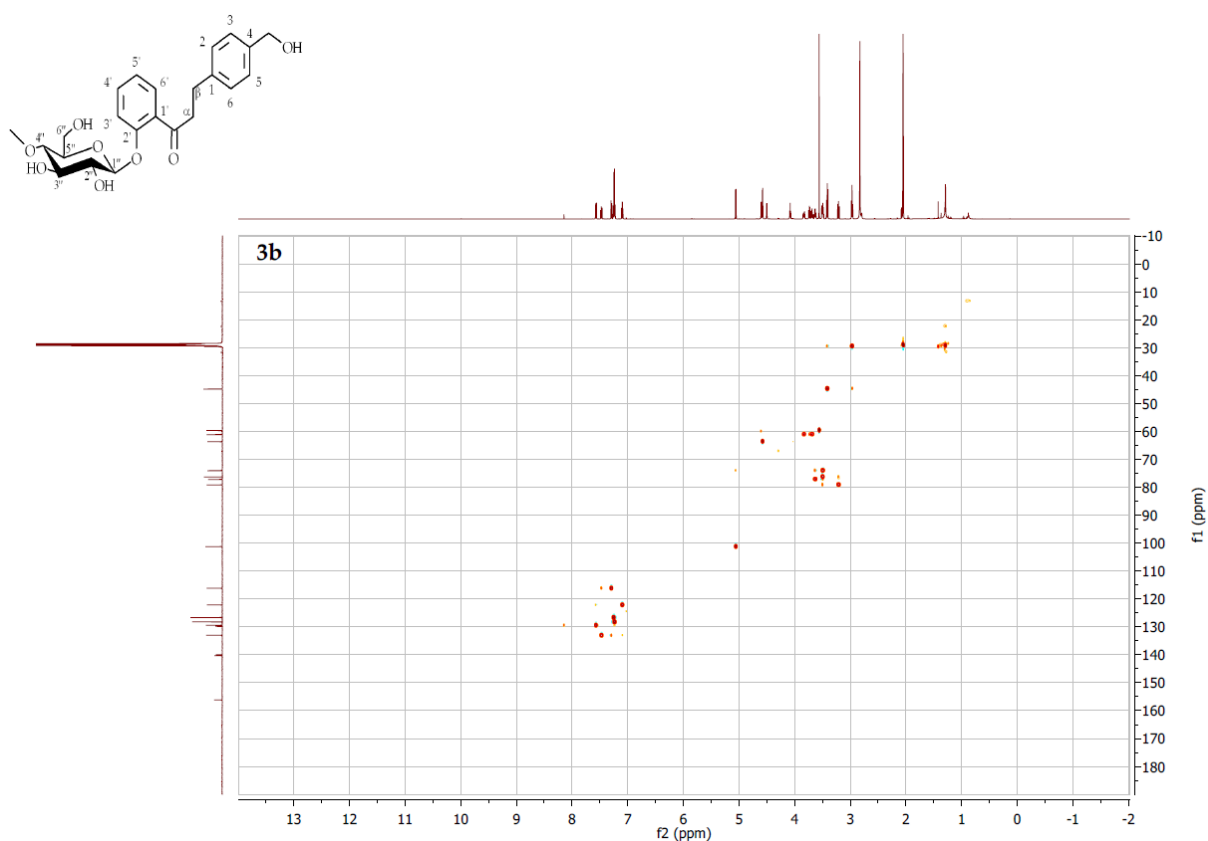

**Figure S56.** HSQC contour map –  $^1\text{H} \times ^{13}\text{C}$  of 4-hydroxymethyldihydrochalcone 2'-O- $\beta$ -D-(4''-O-methyl)-glucopyranoside (**3b**)

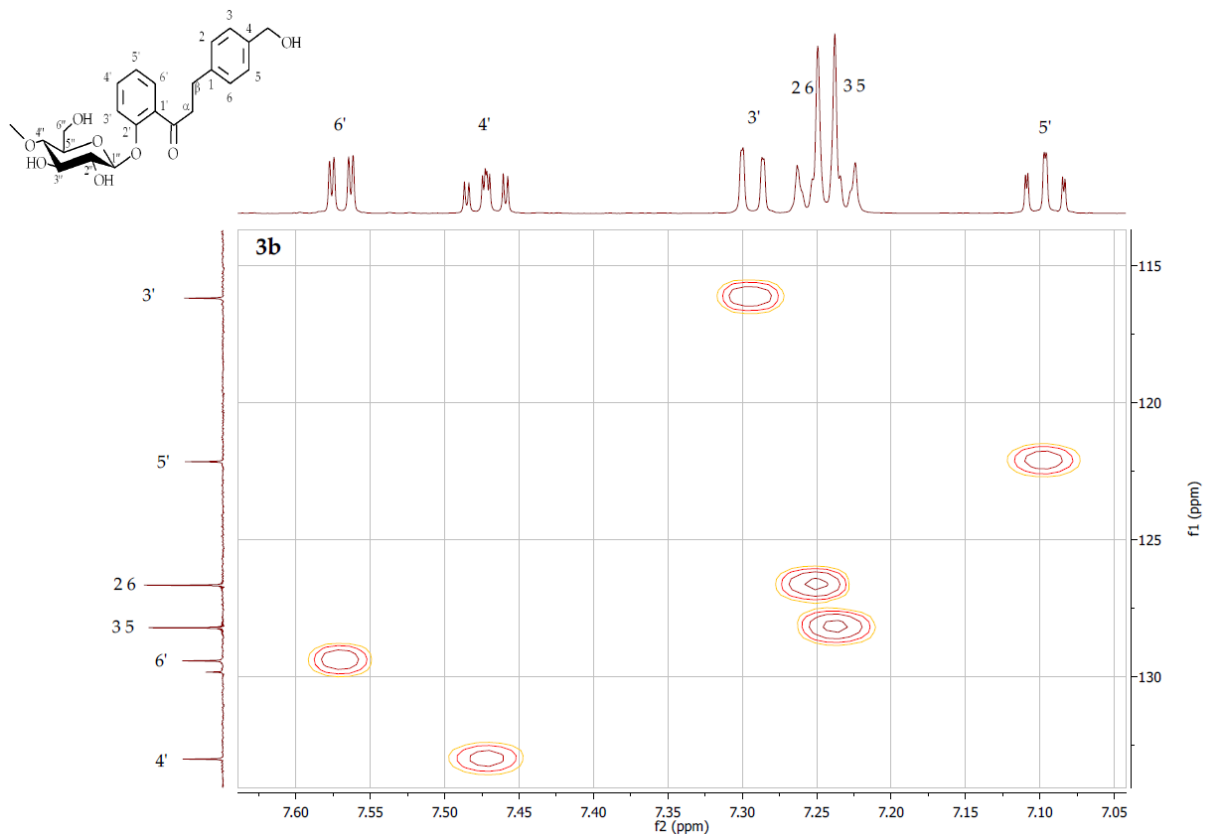

**Figure S57.** HSQC contour map –  $^1\text{H} \times ^{13}\text{C}$  expansion of 4-hydroxymethyldihydrochalcone 2'-O- $\beta$ -D-(4''-O-methyl)-glucopyranoside (**3b**)

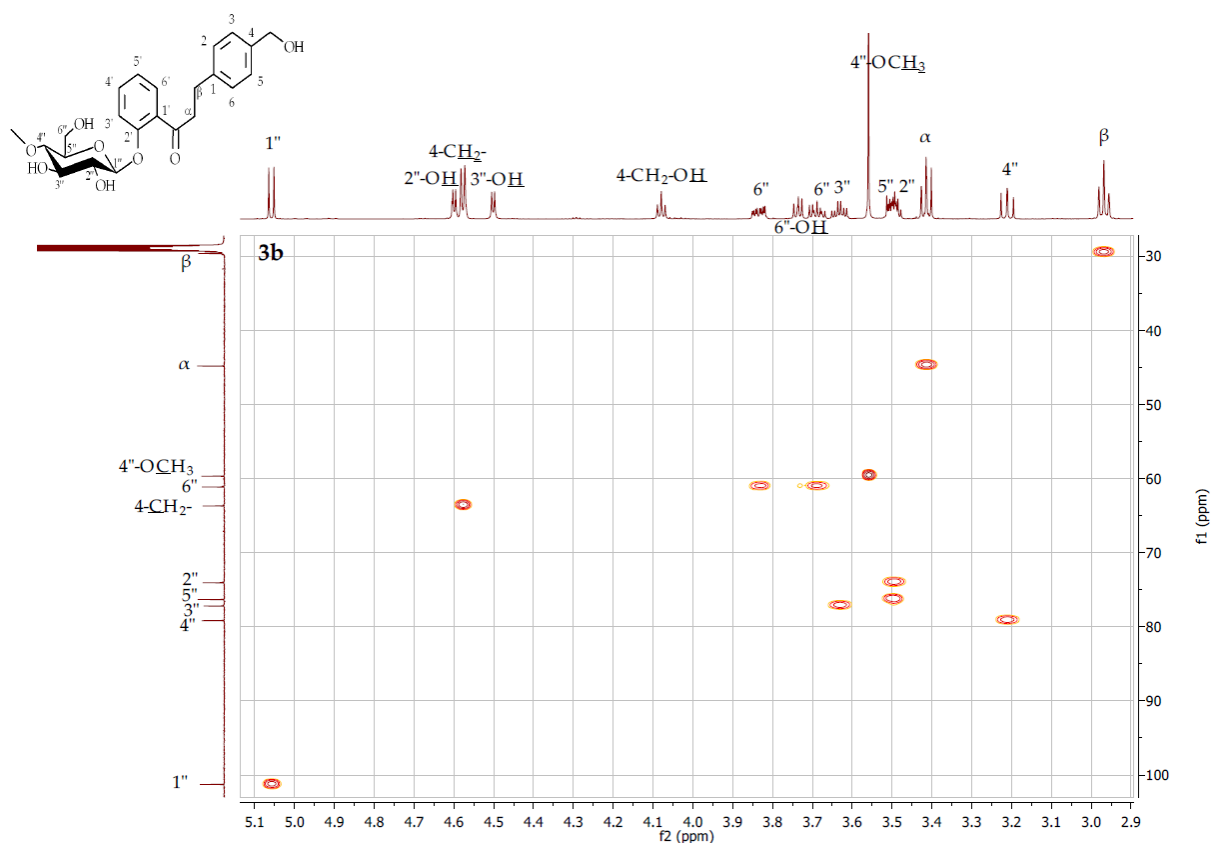

**Figure S58.** HSQC contour map –  $^1\text{H} \times ^{13}\text{C}$  expansion of 4-hydroxymethyldihydrochalcone 2'-O- $\beta$ -D-(4''-O-methyl)-glucopyranoside (**3b**)

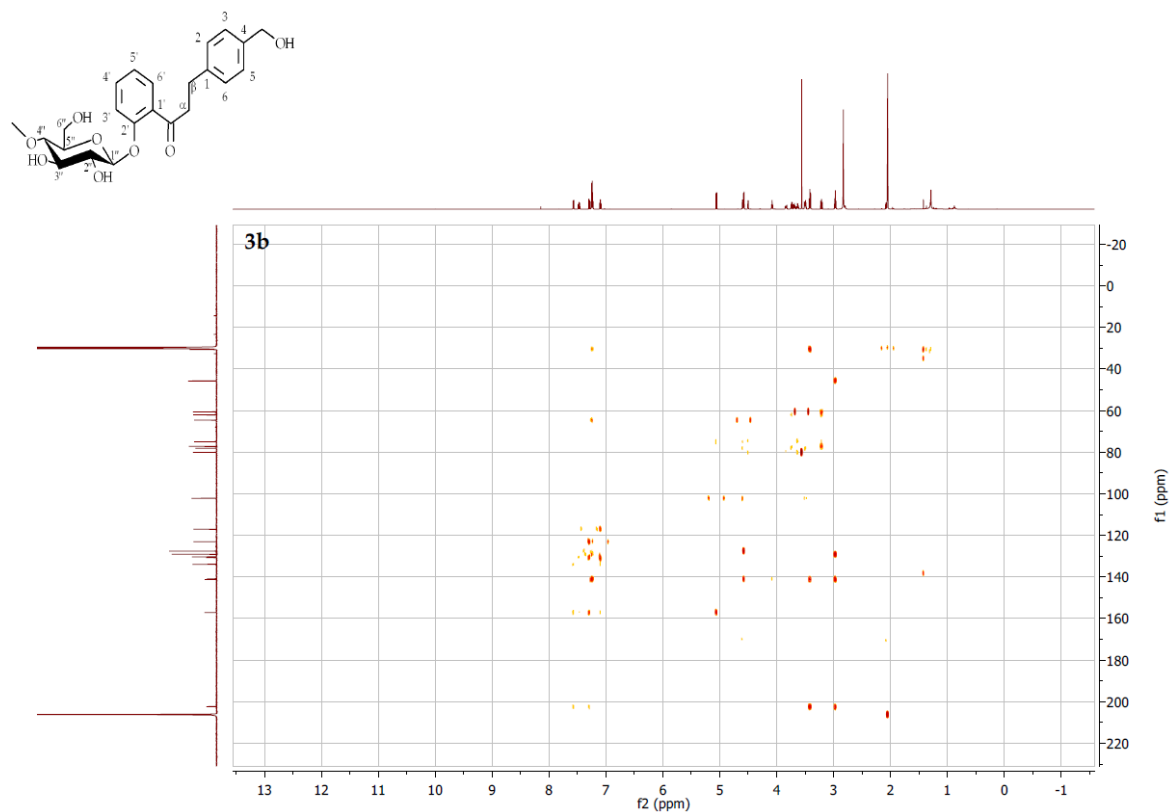

**Figure S59.** HMBC contour map –  $^1\text{H} \times ^{13}\text{C}$  of 4-hydroxymethyldihydrochalcone 2'-O- $\beta$ -D-(4''-O-methyl)-glucopyranoside (**3b**)

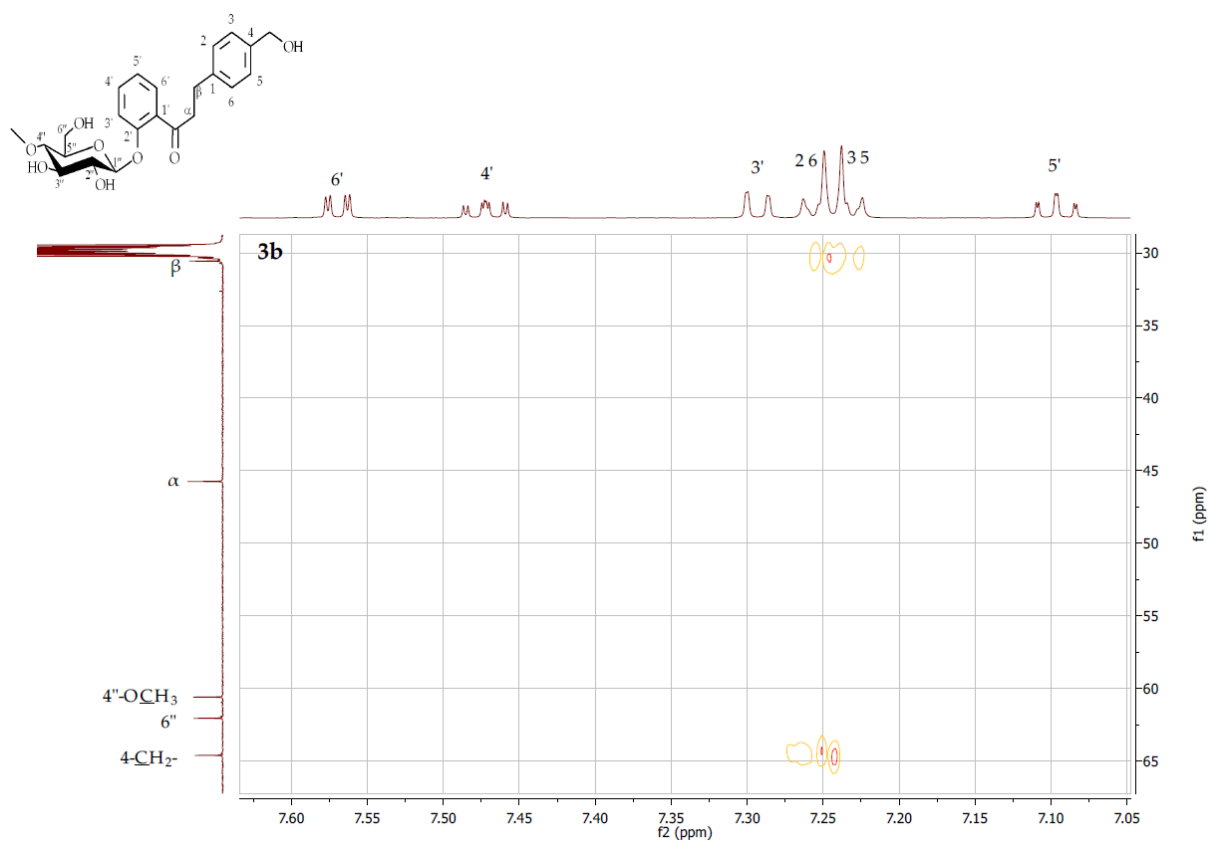

**Figure S60.** HMBC contour map –  $^1\text{H} \times ^{13}\text{C}$  expansion of 4-hydroxymethyldihydrochalcone 2'-O-β-D-(4''-O-methyl)-glucopyranoside (**3b**)

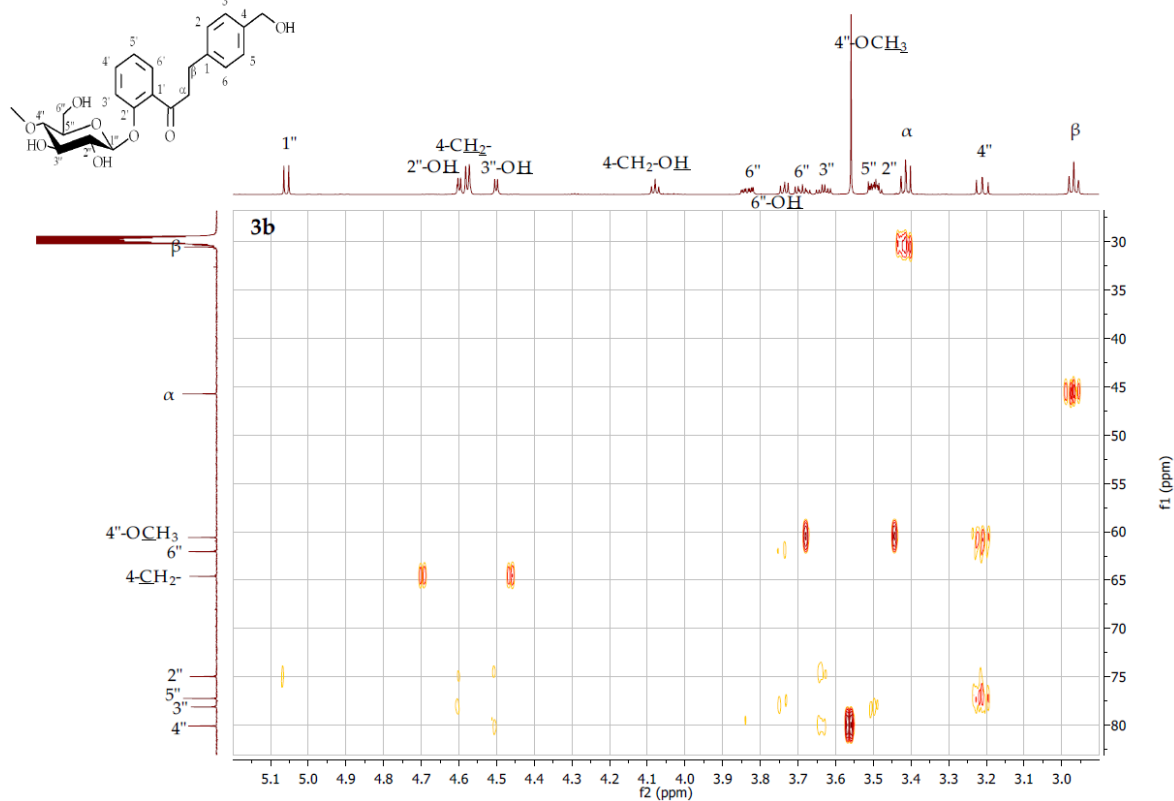

**Figure S61.** HMBC contour map –  $^1\text{H} \times ^{13}\text{C}$  expansion of 4-hydroxymethyldihydrochalcone 2'-O-β-D-(4''-O-methyl)-glucopyranoside (**3b**)

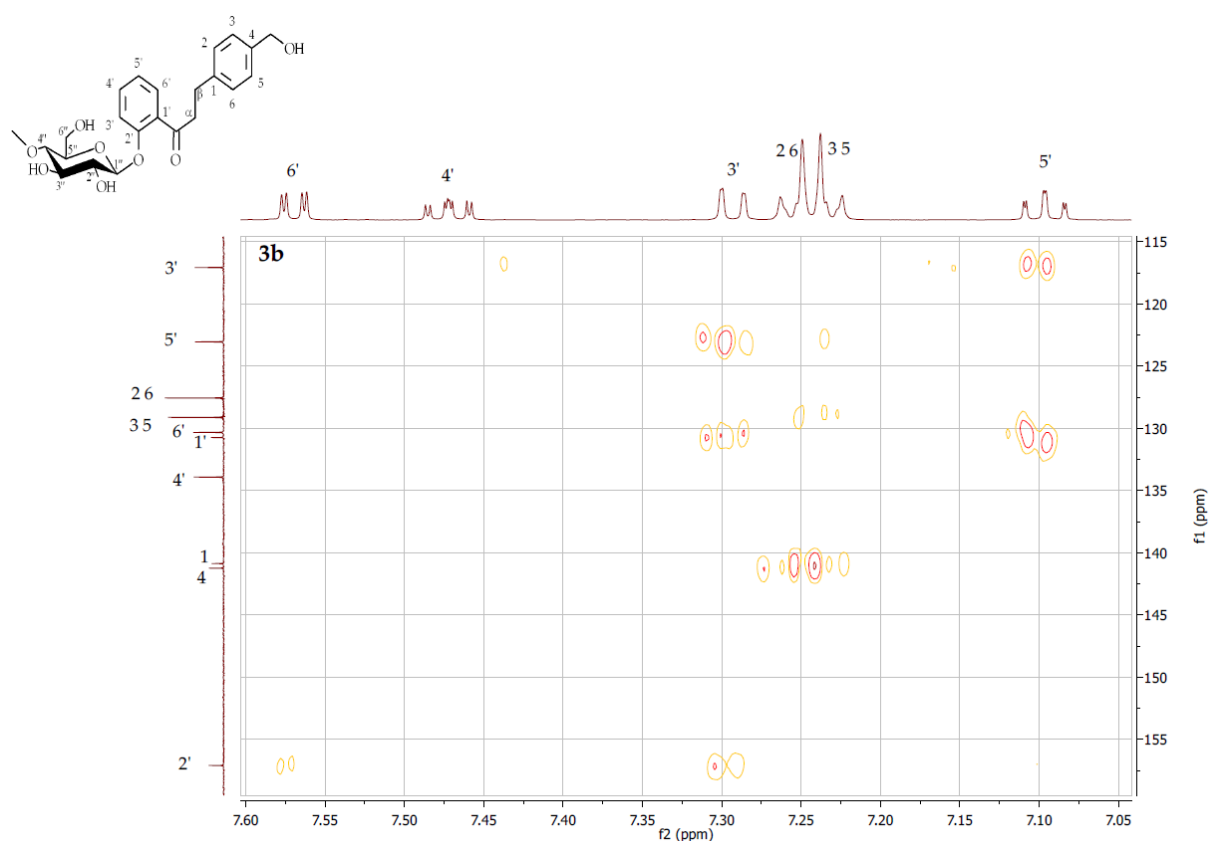

**Figure S62.** HMBC contour map –  $^1\text{H}$  x  $^{13}\text{C}$  expansion of 4-hydroxymethyldihydrochalcone 2'-O- $\beta$ -D-(4''-O-methyl)-glucopyranoside (**3b**)

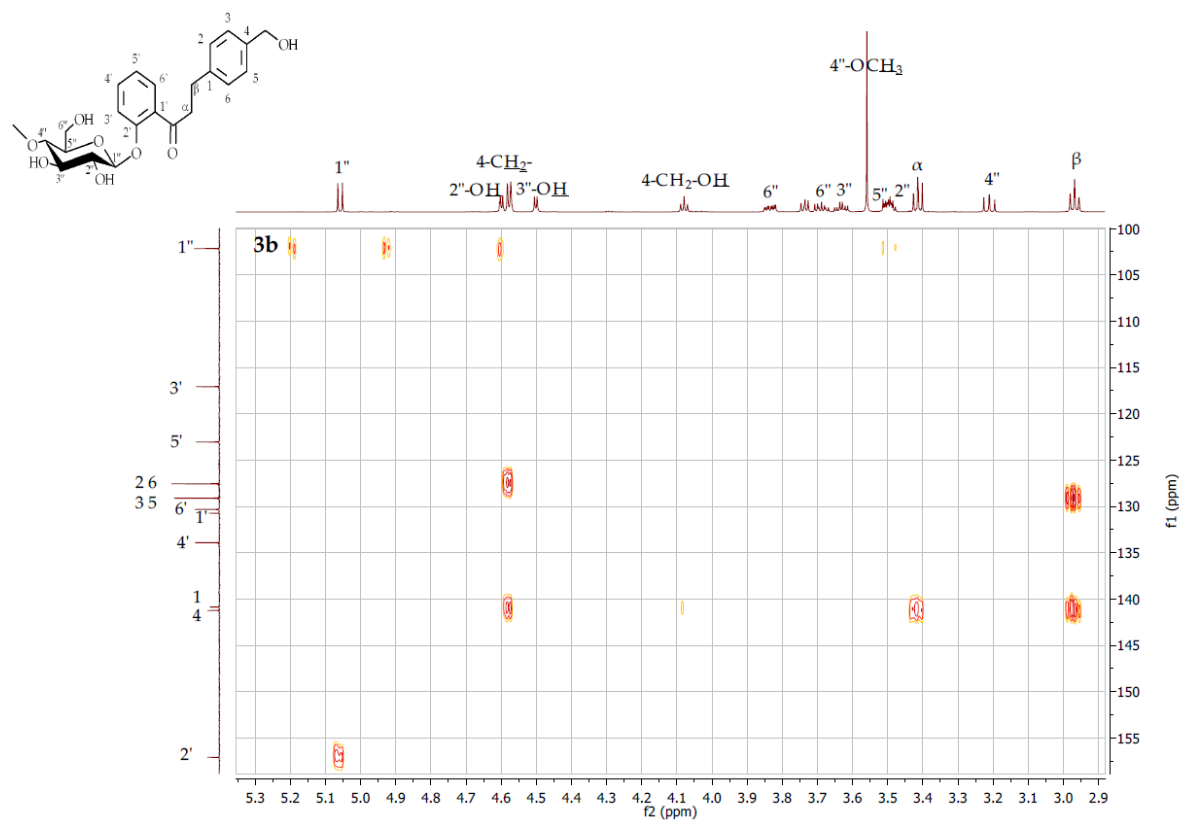

**Figure S63.** HMBC contour map –  $^1\text{H}$  x  $^{13}\text{C}$  expansion of 4-hydroxymethyldihydrochalcone 2'-O- $\beta$ -D-(4''-O-methyl)-glucopyranoside (**3b**)

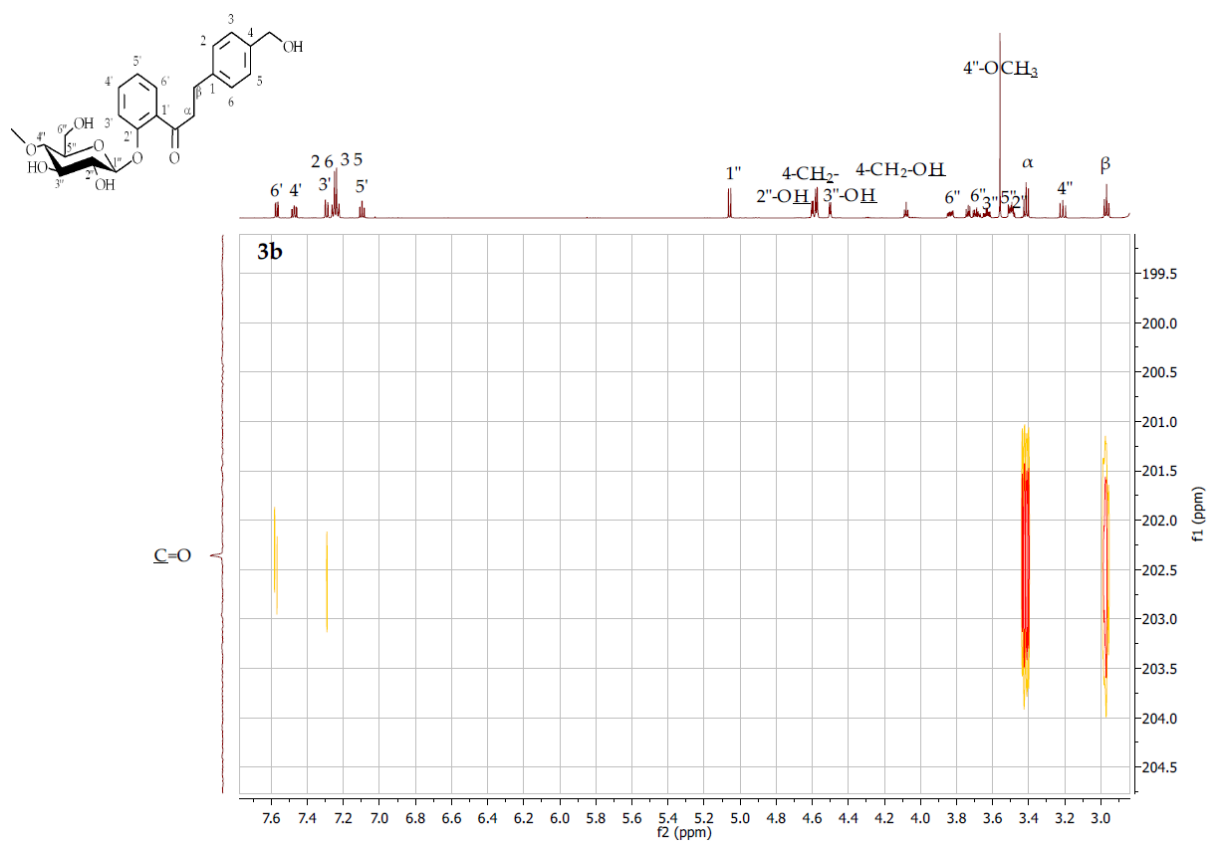

**Figure S64.** HMBC contour map –  $^1\text{H} \times ^{13}\text{C}$  expansion of 4-hydroxymethyldihydrochalcone 2'-O- $\beta$ -D-(4''-O-methyl)-glucopyranoside (**3b**)

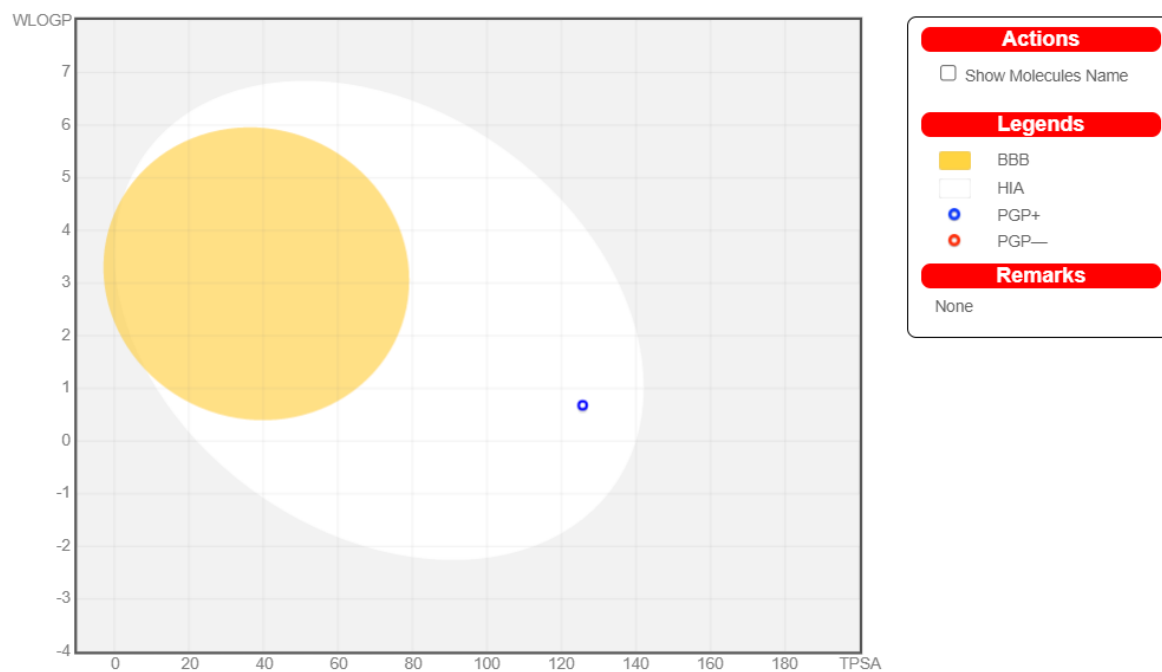

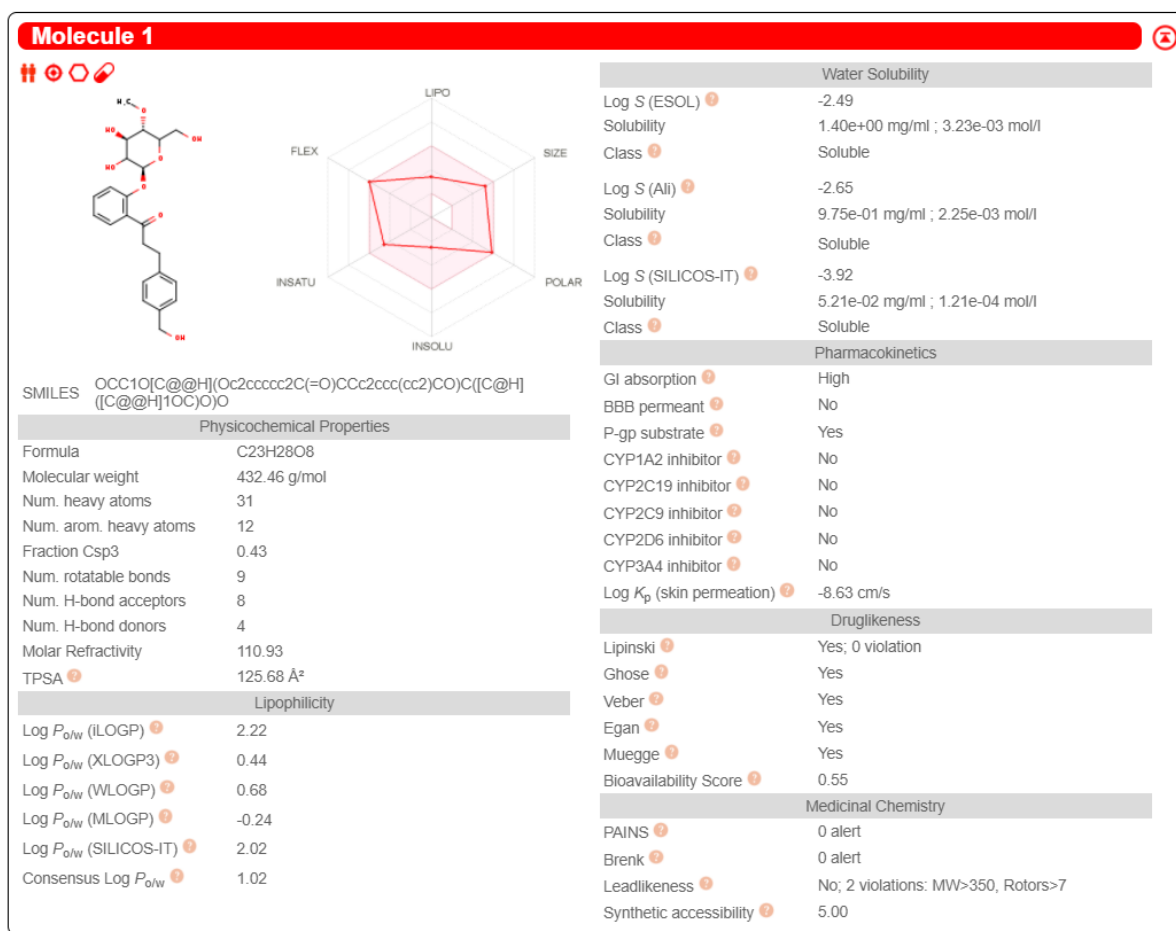

**Figure S65.** 4-Hydroxymethyldihydrochalcone 2'-O- $\beta$ -D-(4''-O-methyl)-glucopyranoside (**3b**) physicochemical and ADME parameters prediction using the SwissADME modelling

☒ All 
 ☐ Pa>Pi 
 ☐ Pa>0,3 
 ☐ Pa>0,7

| Pa    | Pi    | Activity                                         |
|-------|-------|--------------------------------------------------|
| 0,948 | 0,001 | 3-Phytase inhibitor                              |
| 0,943 | 0,004 | CDP-glycerol glycerophosphotransferase inhibitor |
| 0,914 | 0,001 | Lactase inhibitor                                |
| 0,897 | 0,002 | Monophenol monooxygenase inhibitor               |
| 0,873 | 0,008 | Alkenylglycerophosphocholine hydrolase inhibitor |
| 0,870 | 0,007 | Sugar-phosphatase inhibitor                      |
| 0,864 | 0,003 | Beta-mannosidase inhibitor                       |
| 0,860 | 0,006 | Anaphylatoxin receptor antagonist                |
| 0,857 | 0,010 | Benzoate-CoA ligase inhibitor                    |
| 0,836 | 0,004 | Anticarcinogenic                                 |

**Figure S66.** 4-Hydroxymethyldihydrochalcone 2'-O- $\beta$ -D-(4''-O-methyl)-glucopyranoside (**3b**) biological activity prediction using the Way2Drug Pass online modelling

| Name                                                 | Confidence | ChEMBL ID     |
|------------------------------------------------------|------------|---------------|
| Clostridium ramosum                                  | 0.6565     | CHEMBL614971  |
| Actinomyces meyeri                                   | 0.6090     | CHEMBL612289  |
| RESISTANT Acinetobacter pittii                       | 0.6066     | CHEMBL3140321 |
| Mycobacterium mageritense                            | 0.5953     | CHEMBL612959  |
| Clostridium cadaveris                                | 0.5769     | CHEMBL614970  |
| RESISTANT Mycobacterium ulcerans                     | 0.5751     | CHEMBL612965  |
| RESISTANT Staphylococcus aureus subsp. aureus RN4220 | 0.5275     | CHEMBL2366906 |
| Streptococcus oralis                                 | 0.4533     | CHEMBL613305  |
| Lactobacillus plantarum                              | 0.4445     | CHEMBL614973  |
| Staphylococcus lugdunensis                           | 0.4419     | CHEMBL613303  |
| Nocardia transvalensis                               | 0.4393     | CHEMBL613234  |
| Clostridium sordellii                                | 0.4174     | CHEMBL613072  |
| RESISTANT Chlamydia trachomatis                      | 0.3922     | CHEMBL614606  |
| Streptococcus sanguinis                              | 0.3656     | CHEMBL612314  |
| Nocardia otitidiscaviarum                            | 0.3600     | CHEMBL613233  |

**Figure S67.** 4-Hydroxymethyldihydrochalcone 2'-O-β-D-(4"-O-methyl)-glucopyranoside (**3b**) antibacterial activity prediction using the Way2Drug AntiBac-Pred modelling

| Name                        | Confidence | ChEMBL ID    |
|-----------------------------|------------|--------------|
| Rhizopus oryzae             | 0.4848     | CHEMBL612306 |
| Absidia corymbifera         | 0.4111     | CHEMBL612369 |
| Trichophyton mentagrophytes | 0.2890     | CHEMBL613162 |
| Saccharomyces cerevisiae    | 0.2196     | CHEMBL361    |
| Epidermophyton floccosum    | 0.2174     | CHEMBL612386 |
| Mucor                       | 0.2038     | CHEMBL612521 |
| Aspergillus niger           | 0.1886     | CHEMBL358    |
| Yarrowia lipolytica         | 0.1742     | CHEMBL612844 |
| Penicillium marneffei       | 0.1329     | CHEMBL612994 |
| Mucor hiemalis              | 0.1073     | CHEMBL612949 |
| Candida rugosa              | 0.0422     | CHEMBL612869 |
| Cryptococcus bacillisporus  | 0.0181     | CHEMBL615035 |
| Galactomyces geotrichum     | 0.0056     | CHEMBL613775 |

**Figure S68.** 4-Hydroxymethyldihydrochalcone 2'-O-β-D-(4"-O-methyl)-glucopyranoside (**3b**) antifungal activity prediction using the Way2Drug AntiFun-Pred modelling

| Virus                                                               | Protein target            | Confidence |
|---------------------------------------------------------------------|---------------------------|------------|
| Severe acute respiratory syndrome coronavirus 2                     | Replicase polyprotein 1ab | 0.6833     |
| Varicella-zoster virus (strain Dumas) (HHV-3) (Human herpesvirus 3) | Thymidine kinase          | 0.0144     |

**Figure S69.** 4-Hydroxymethyldihydrochalcone 2'-O-β-D-(4"-O-methyl)-glucopyranoside (**3b**) antiviral activity prediction using the Way2Drug AntiVir-Pred modelling

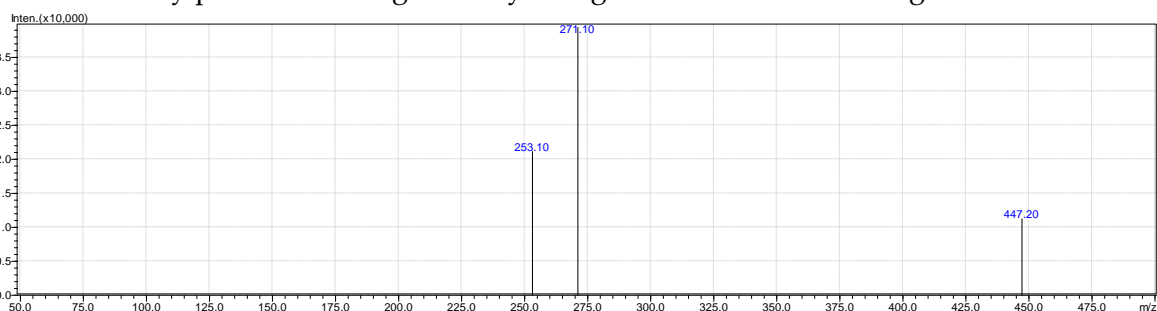

**Figure S70.** MS analysis 2'-hydroxy-4-hydroxymethylchalcone 5'-O-β-D-(4"-O-methyl)-glucopyranoside (**3c**)





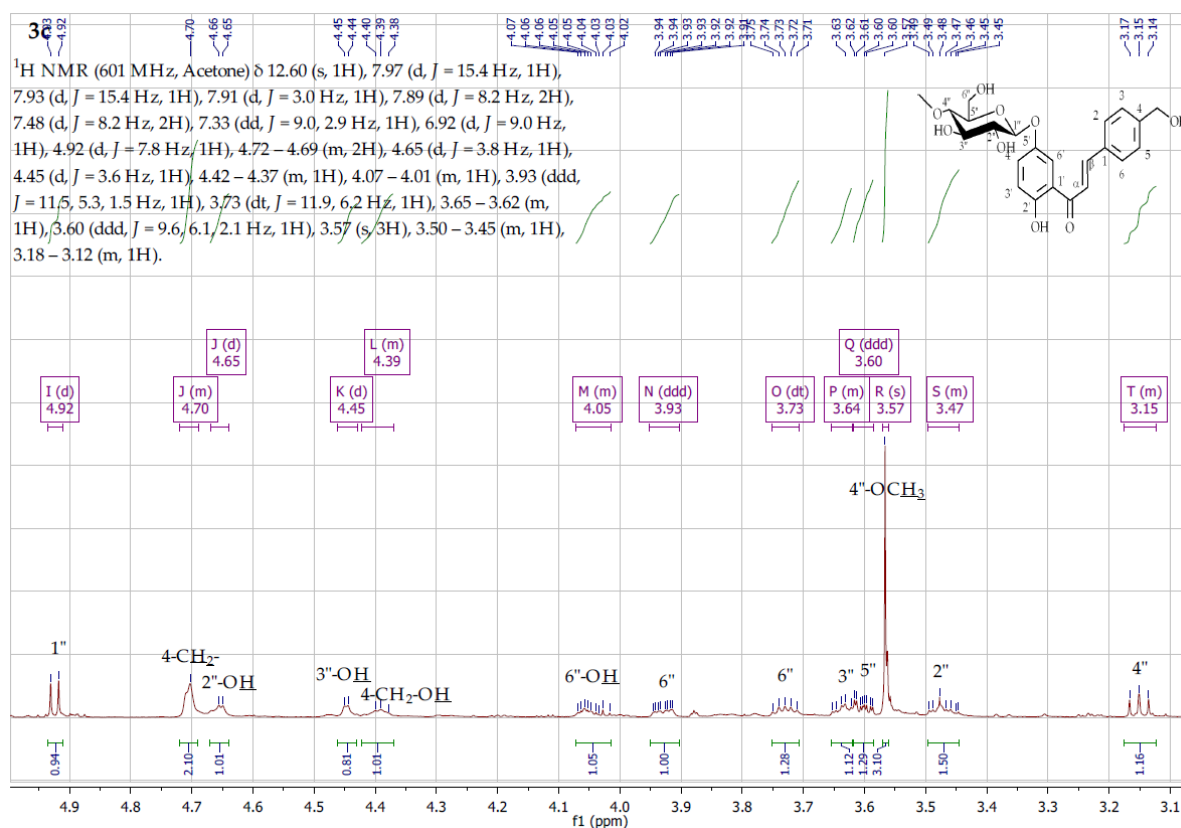

**Figure S73.**  $^1\text{H}$  NMR spectrum expansion ( $\delta$ , acetone- $d_6$ , 600 MHz) of 2'-hydroxy-4-hydroxymethylchalcone 5'- $O$ - $\beta$ -D-(4''- $O$ -methyl)-glucopyranoside (**3c**)

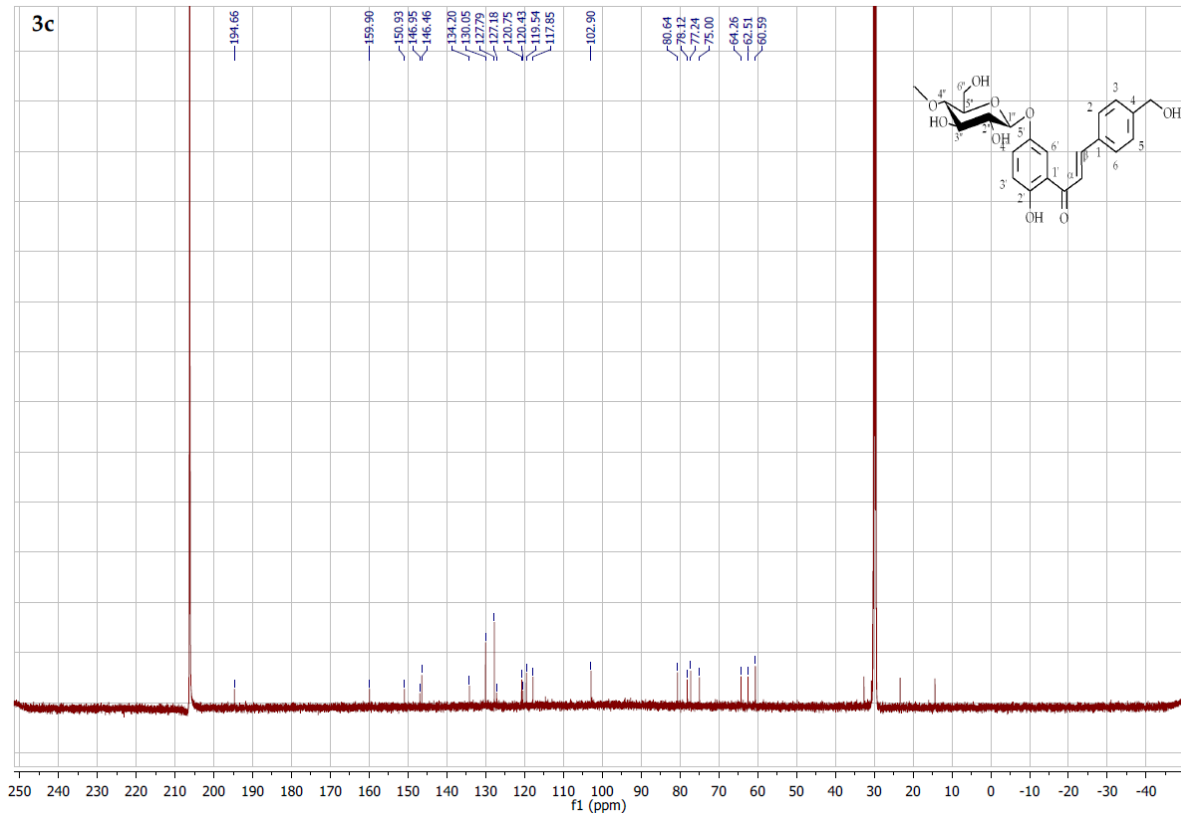

**Figure S74.**  $^{13}\text{C}$  NMR spectrum expansion ( $\delta$ , acetone- $d_6$ , 151 MHz) of 2'-hydroxy-4-hydroxymethylchalcone 5'- $O$ - $\beta$ -D-(4''- $O$ -methyl)-glucopyranoside (**3c**)

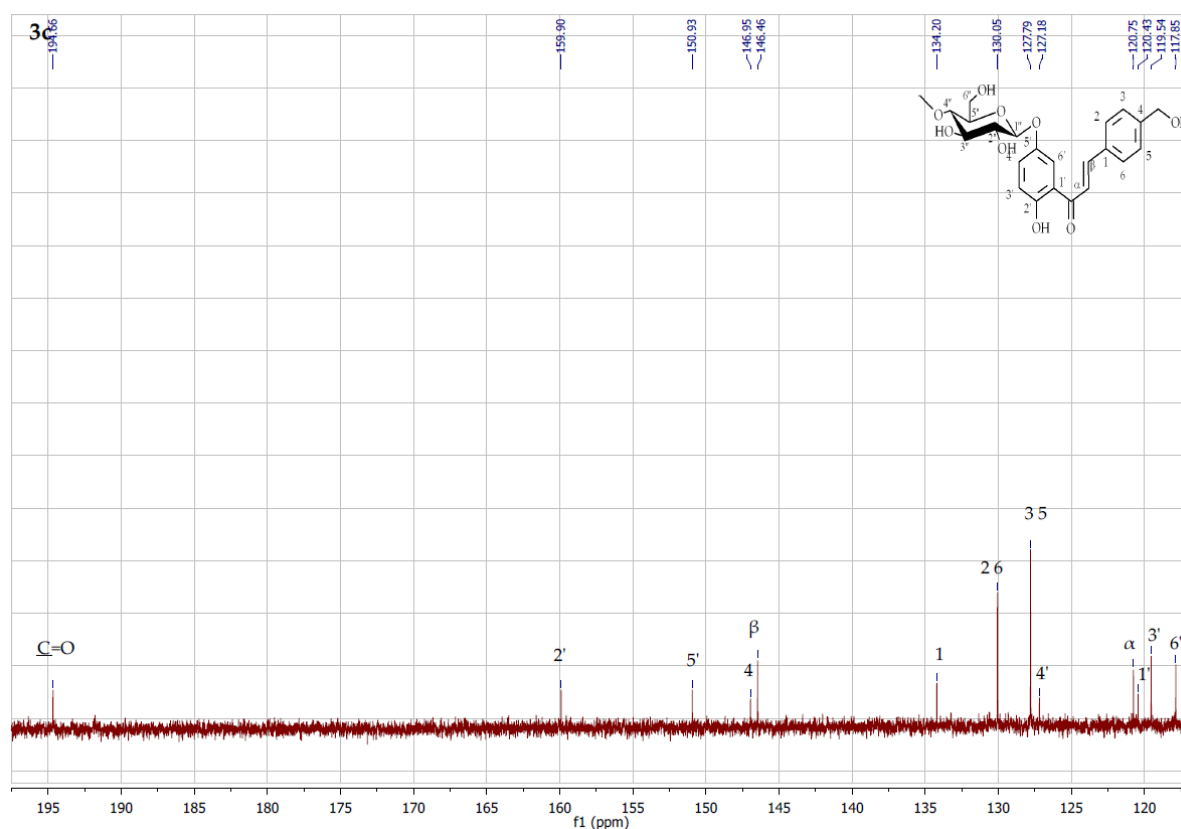

**Figure S75.**  $^{13}\text{C}$  NMR spectrum expansion ( $\delta$ , acetone- $d_6$ , 151 MHz) of 2'-hydroxy-4-hydroxymethylchalcone 5'- $O$ - $\beta$ -D-(4''- $O$ -methyl)-glucopyranoside (**3c**)

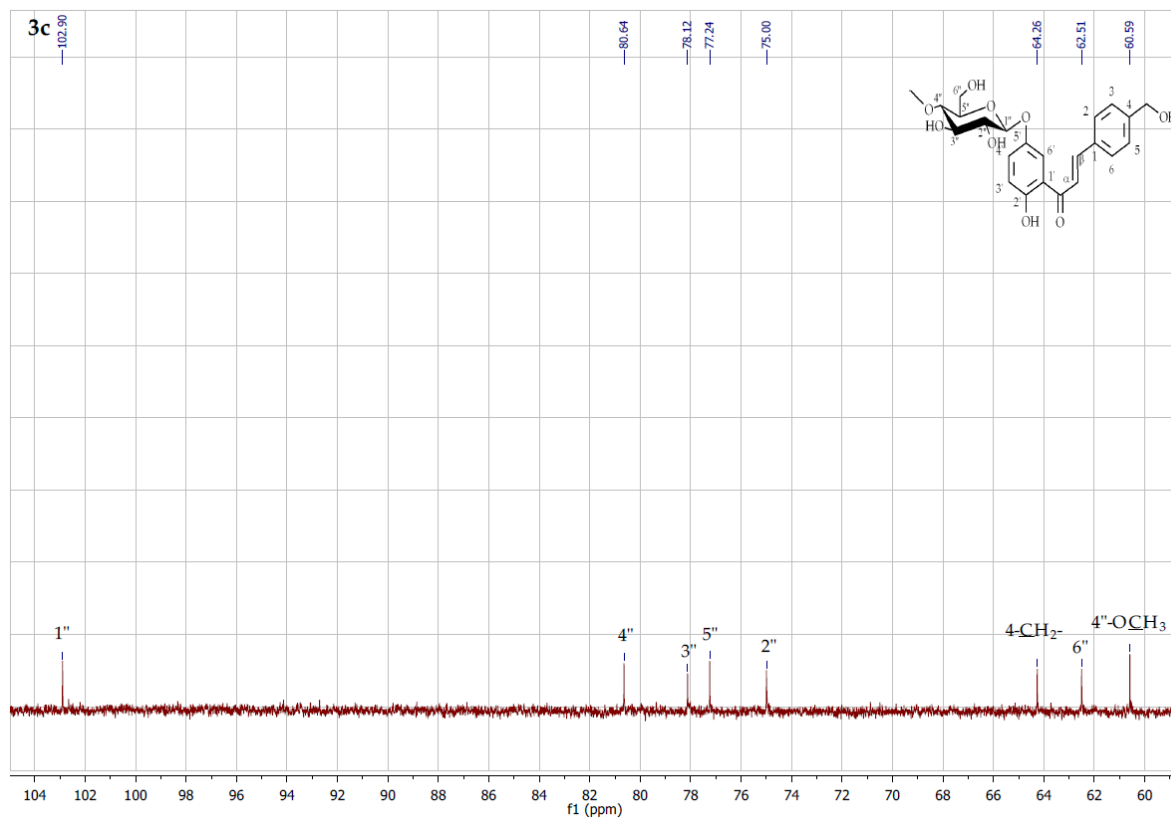

**Figure S76.**  $^{13}\text{C}$  NMR spectrum expansion ( $\delta$ , acetone- $d_6$ , 151 MHz) of 2'-hydroxy-4-hydroxymethylchalcone 5'- $O$ - $\beta$ -D-(4''- $O$ -methyl)-glucopyranoside (**3c**)

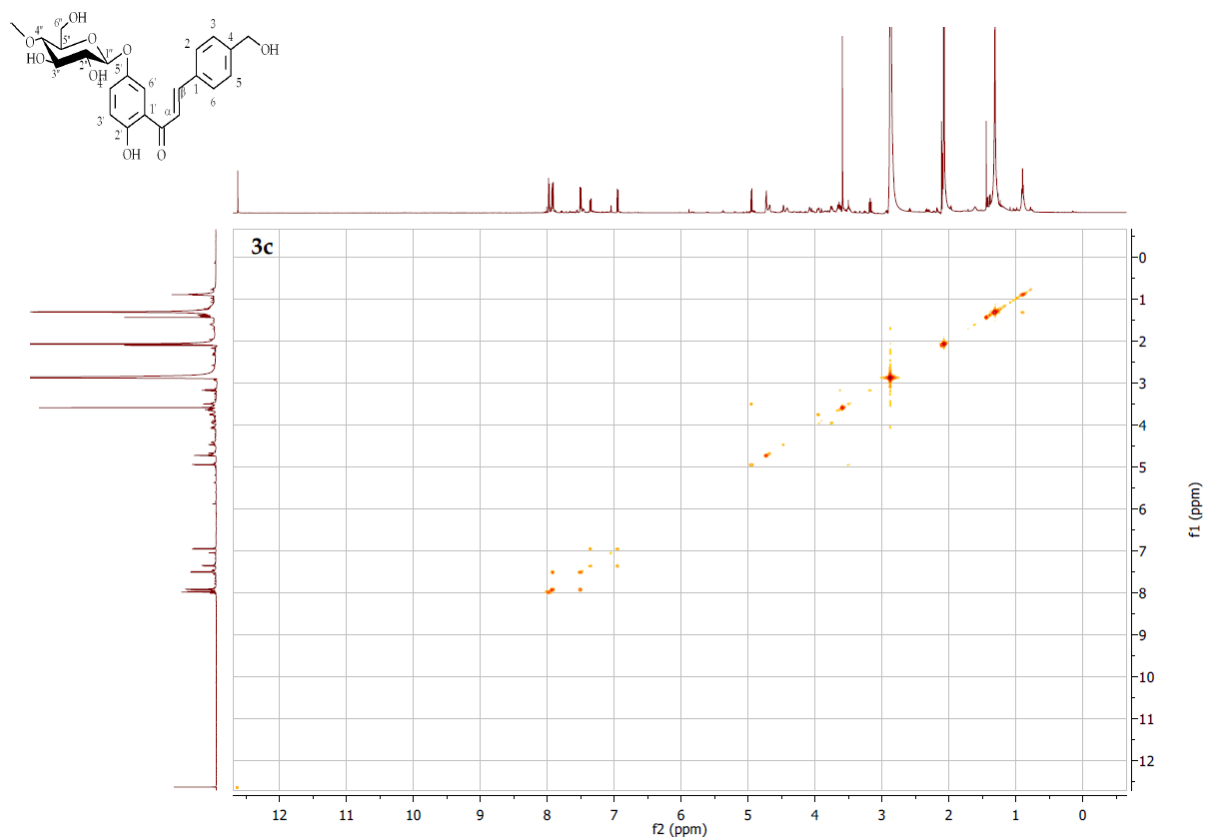

**Figure S77.** COSY contour map –  $^1\text{H} \times ^1\text{H}$  of 4-hydroxymethyldihydrochalcone 2'-hydroxy-4-hydroxymethylchalcone 5'-O- $\beta$ -D-(4''-O-methyl)-glucopyranoside (**3c**)

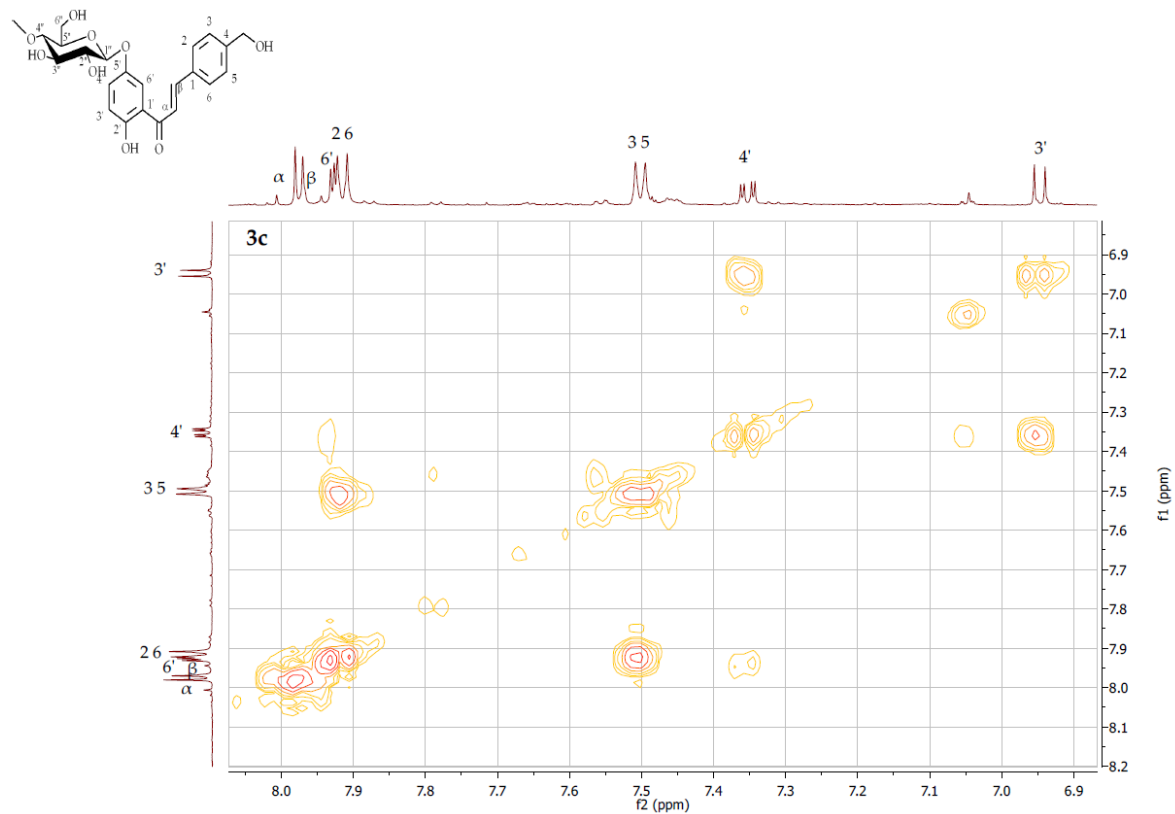

**Figure S78.** COSY contour map –  $^1\text{H} \times ^1\text{H}$  expansion of 2'-hydroxy-4-hydroxymethylchalcone 5'-O- $\beta$ -D-(4''-O-methyl)-glucopyranoside (**3c**)

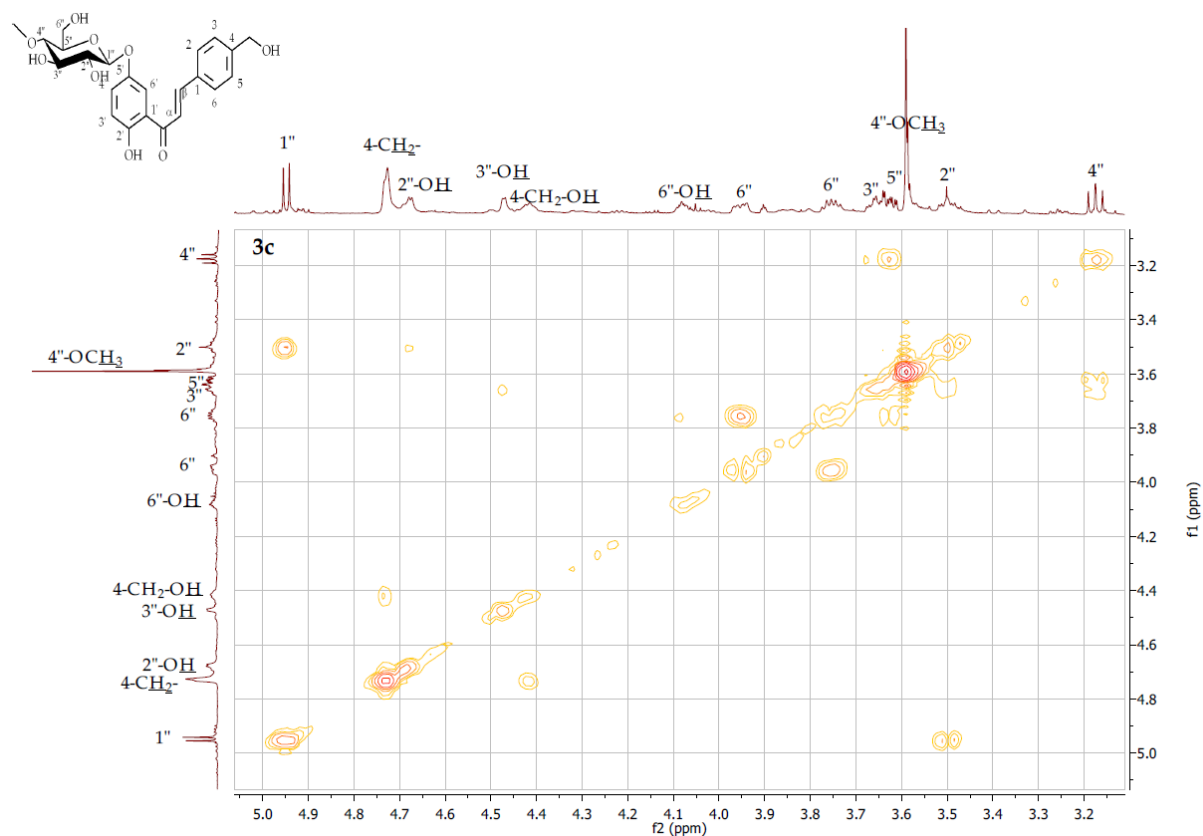

**Figure S79.** COSY contour map –  $^1\text{H} \times ^1\text{H}$  expansion of 2'-hydroxy-4-hydroxymethylchalcone 5'-O- $\beta$ -D-(4''-O-methyl)-glucopyranoside (**3c**)

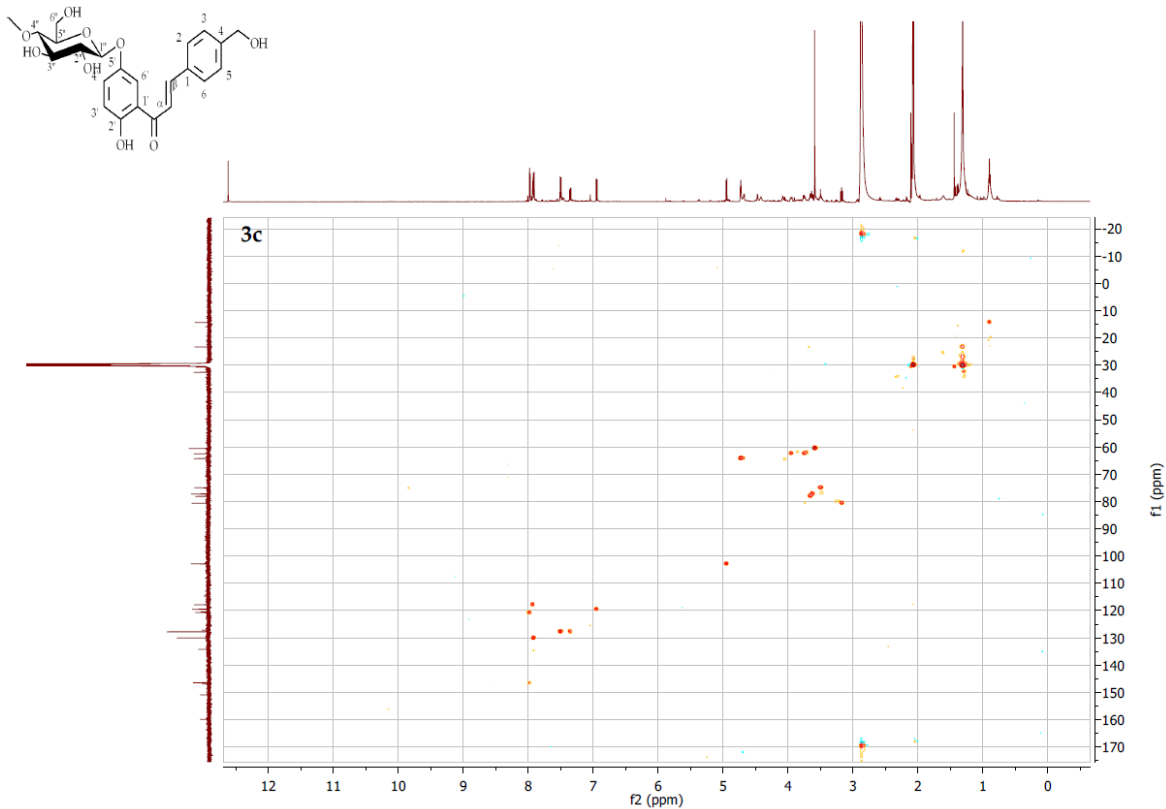

**Figure S80.** HSQC contour map –  $^1\text{H} \times ^{13}\text{C}$  of 2'-hydroxy-4-hydroxymethylchalcone 5'-O- $\beta$ -D-(4''-O-methyl)-glucopyranoside (**3c**)

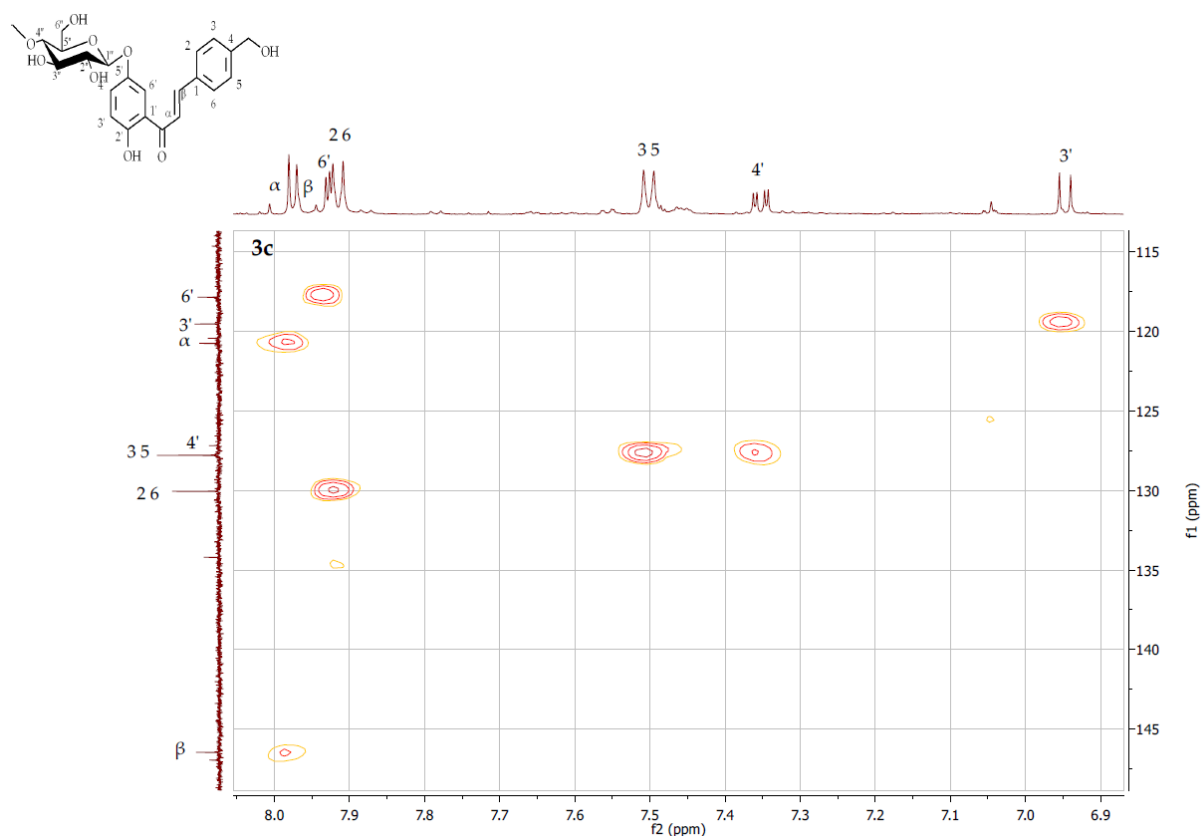

**Figure S81.** HSQC contour map –  $^1\text{H} \times ^{13}\text{C}$  expansion of 2'-hydroxy-4-hydroxymethylchalcone 5'-O- $\beta$ -D-(4''-O-methyl)-glucopyranoside (**3c**)

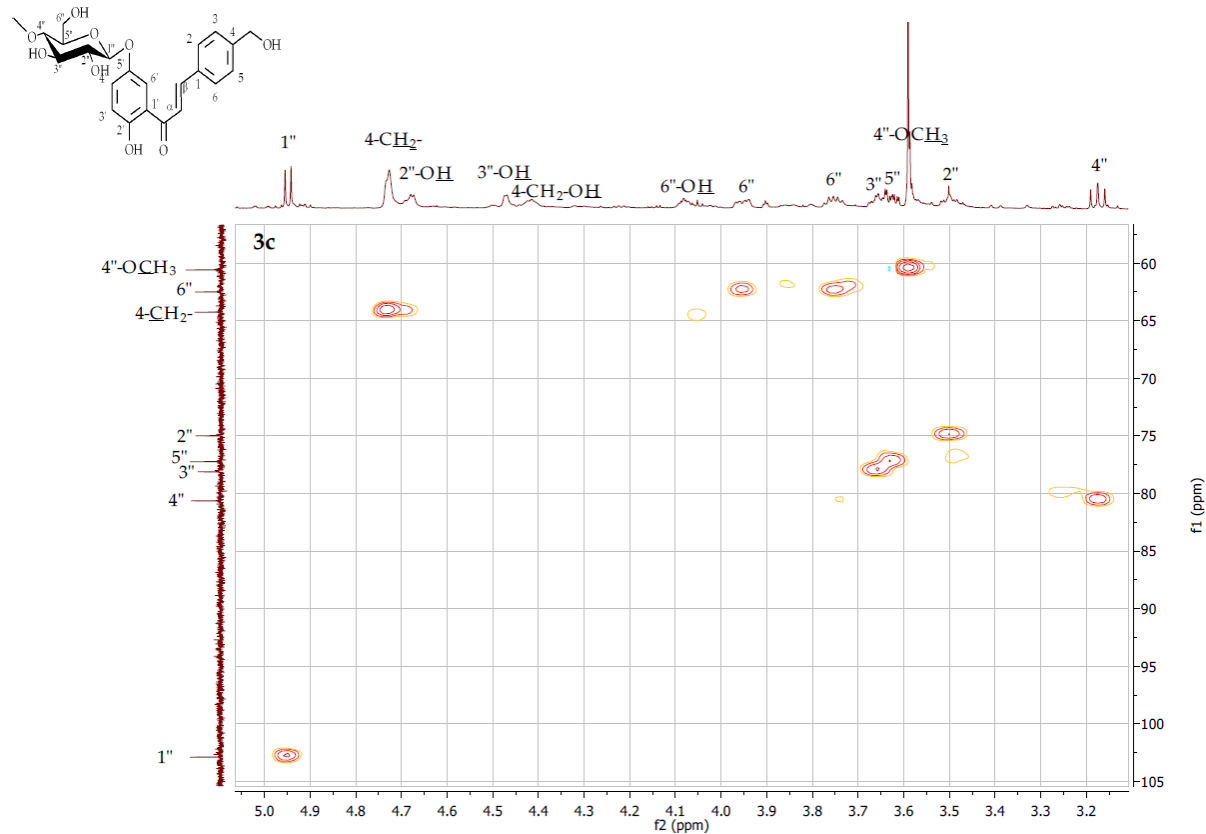

**Figure S82.** HSQC contour map –  $^1\text{H} \times ^{13}\text{C}$  expansion of 2'-hydroxy-4-hydroxymethylchalcone 5'-O- $\beta$ -D-(4''-O-methyl)-glucopyranoside (**3c**)

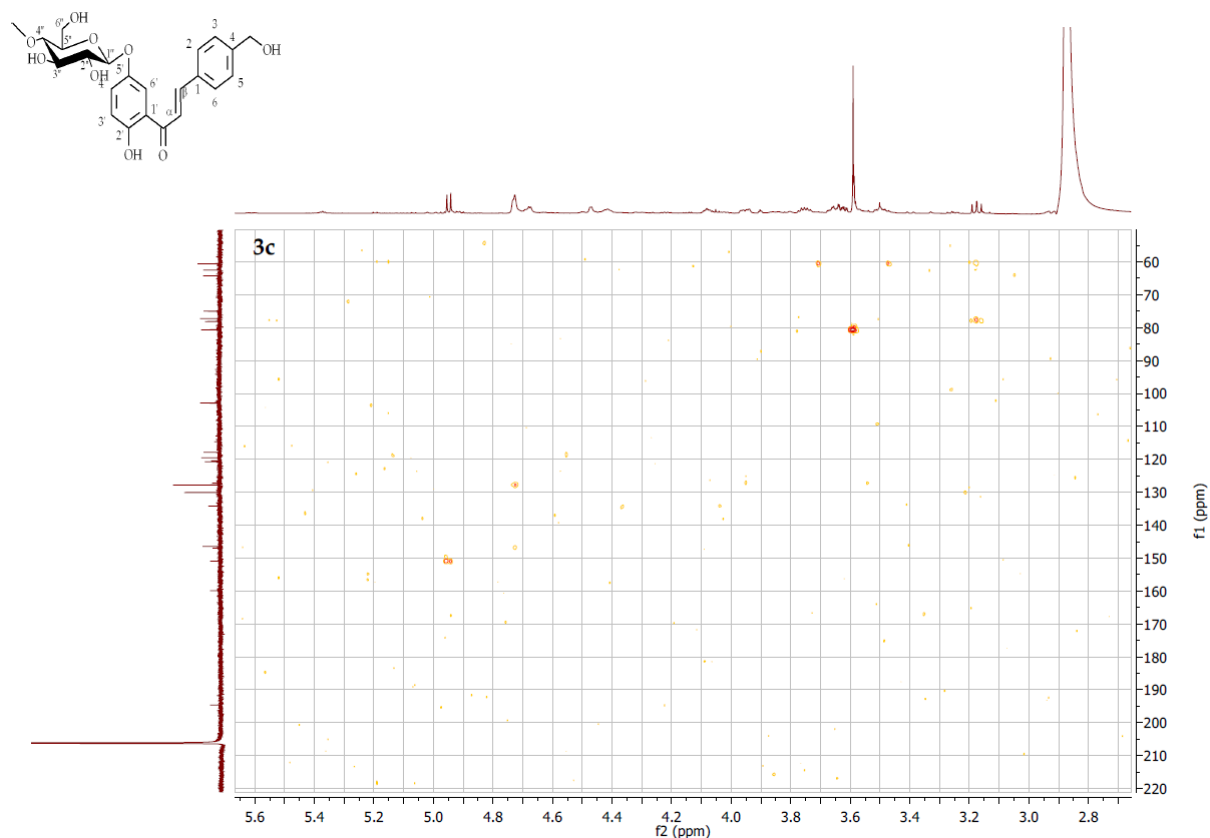

**Figure S83.** HMBC contour map –  $^1\text{H} \times ^{13}\text{C}$  of 2'-hydroxy-4-hydroxymethylchalcone 5'-O- $\beta$ -D-(4''-O-methyl)-glucopyranoside (**3c**)

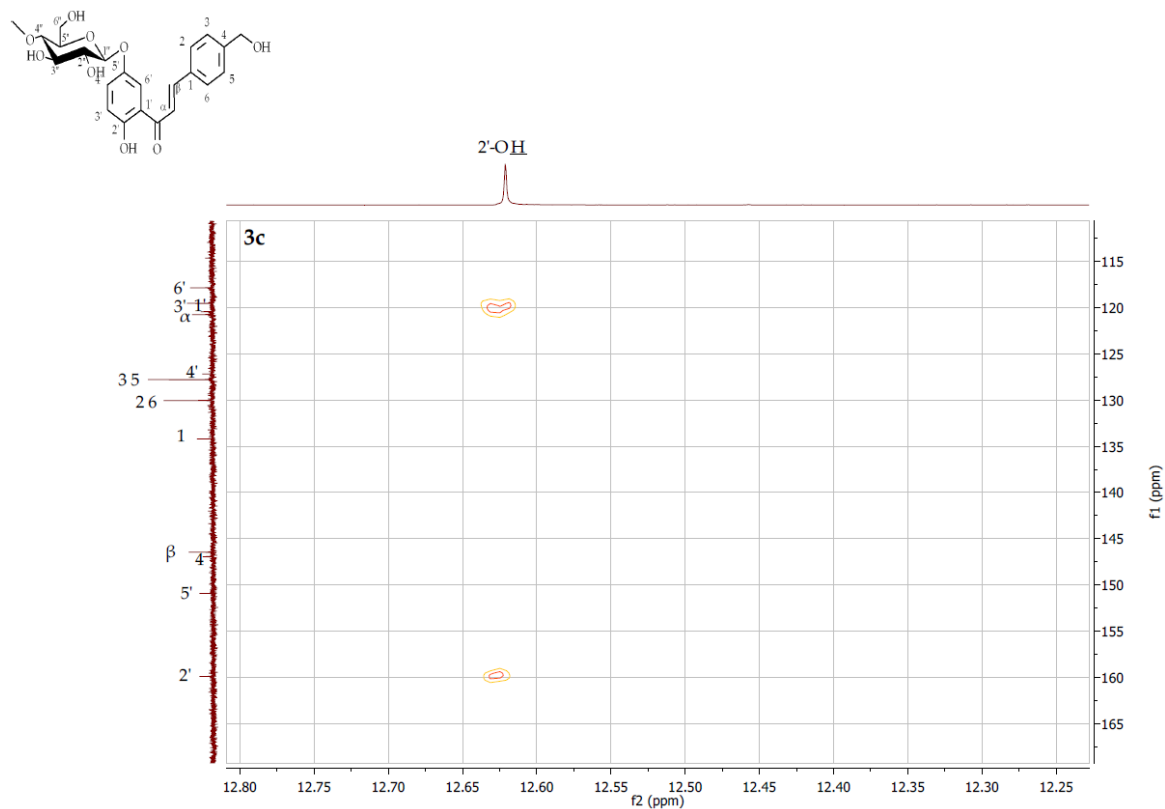

**Figure S84.** HMBC contour map –  $^1\text{H} \times ^{13}\text{C}$  expansion of 2'-hydroxy-4-hydroxymethylchalcone 5'-O- $\beta$ -D-(4''-O-methyl)-glucopyranoside (**3c**)

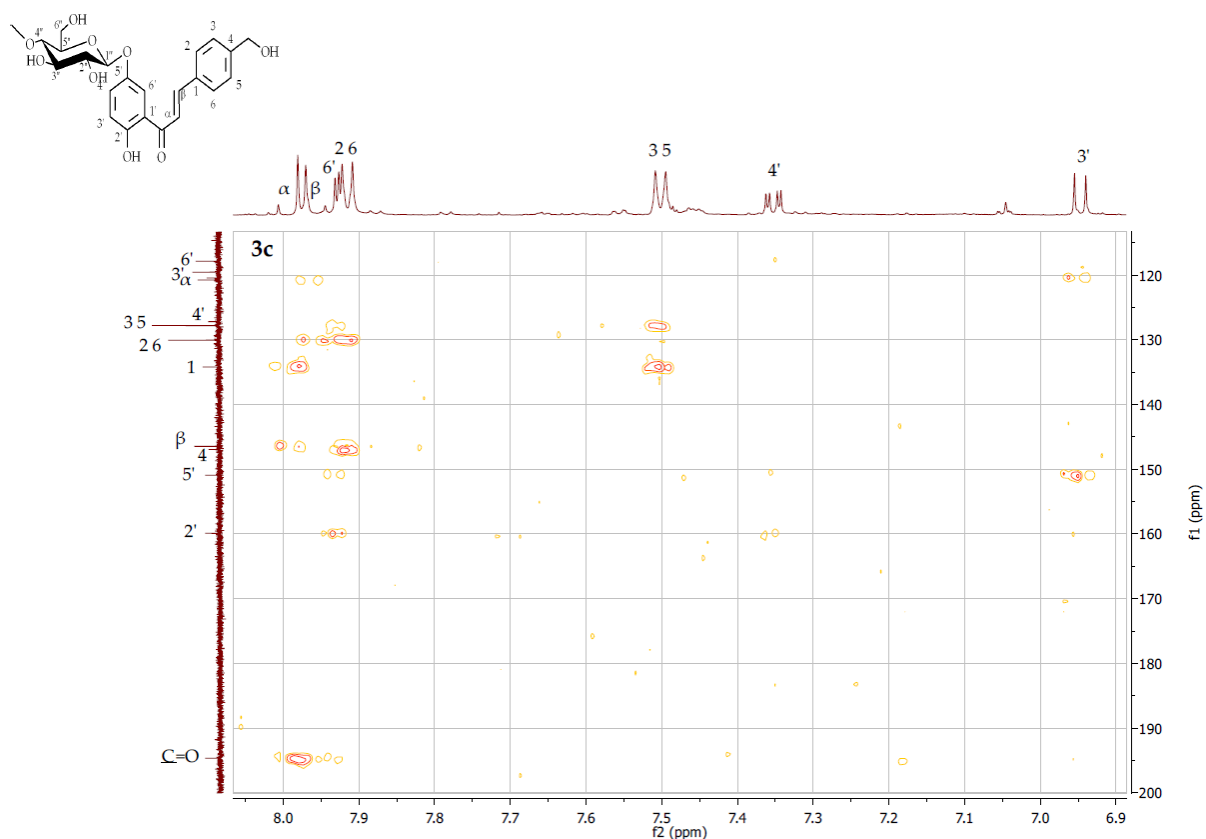

**Figure S85.** HMBC contour map –  $^1\text{H} \times ^{13}\text{C}$  expansion of 2'-hydroxy-4-hydroxymethylchalcone 5'-O- $\beta$ -D-(4''-O-methyl)-glucopyranoside (**3c**)

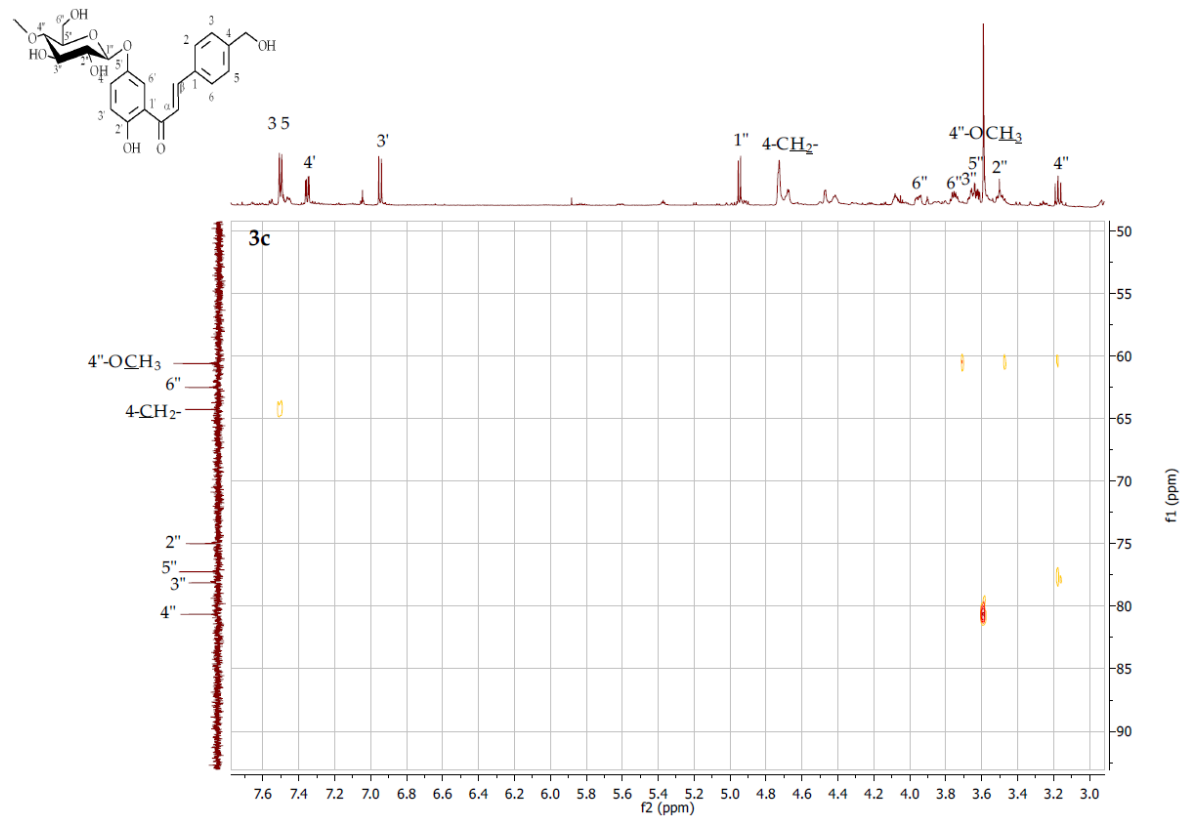

**Figure S86.** HMBC contour map –  $^1\text{H} \times ^{13}\text{C}$  expansion of 2'-hydroxy-4-hydroxymethylchalcone 5'-O- $\beta$ -D-(4''-O-methyl)-glucopyranoside (**3c**)

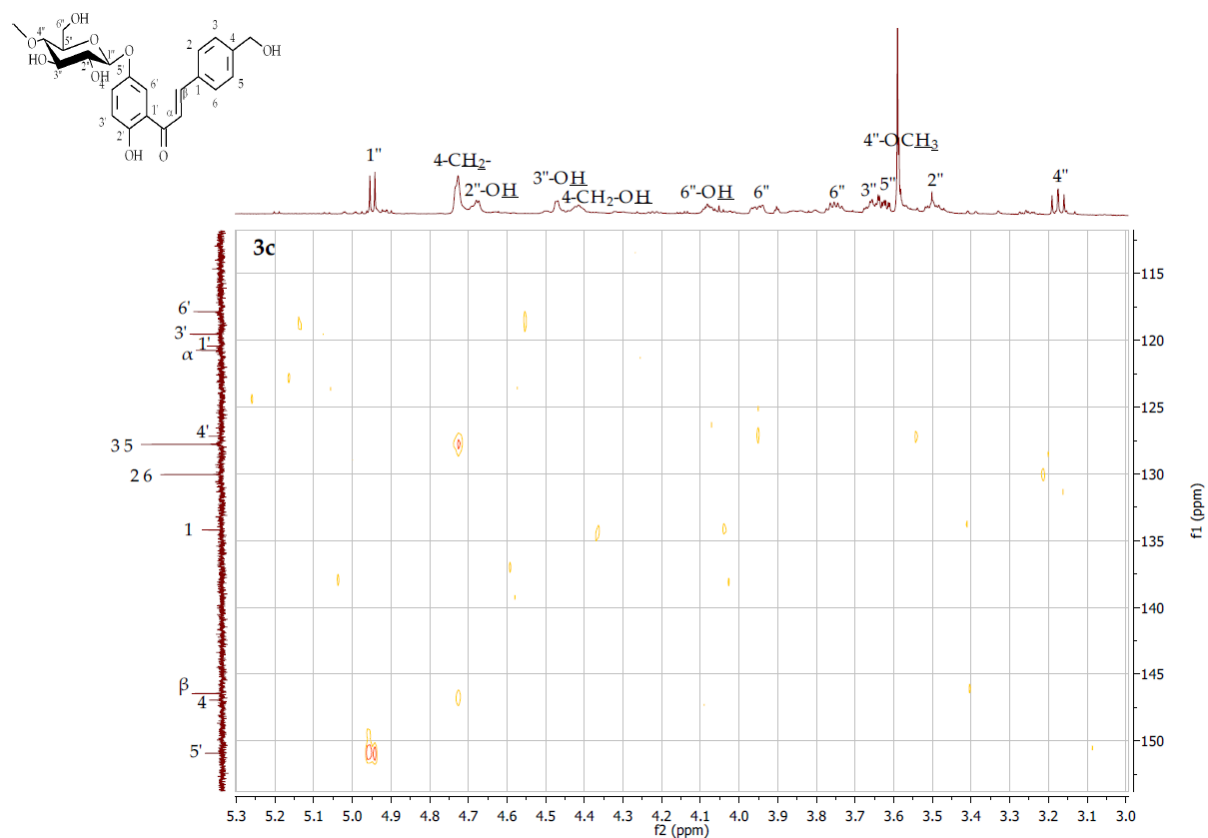

**Figure S87.** HMBC contour map –  $^1\text{H} \times ^{13}\text{C}$  expansion of 2'-hydroxy-4-hydroxymethylchalcone 5'-O- $\beta$ -D-(4''-O-methyl)-glucopyranoside (**3c**)

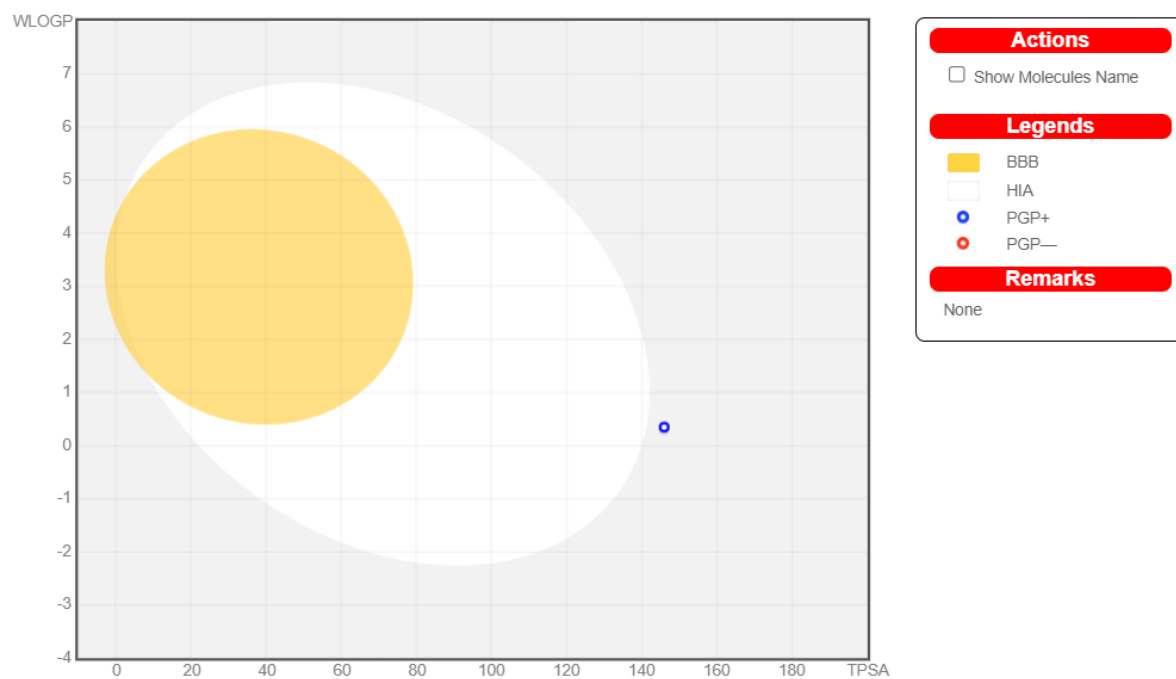



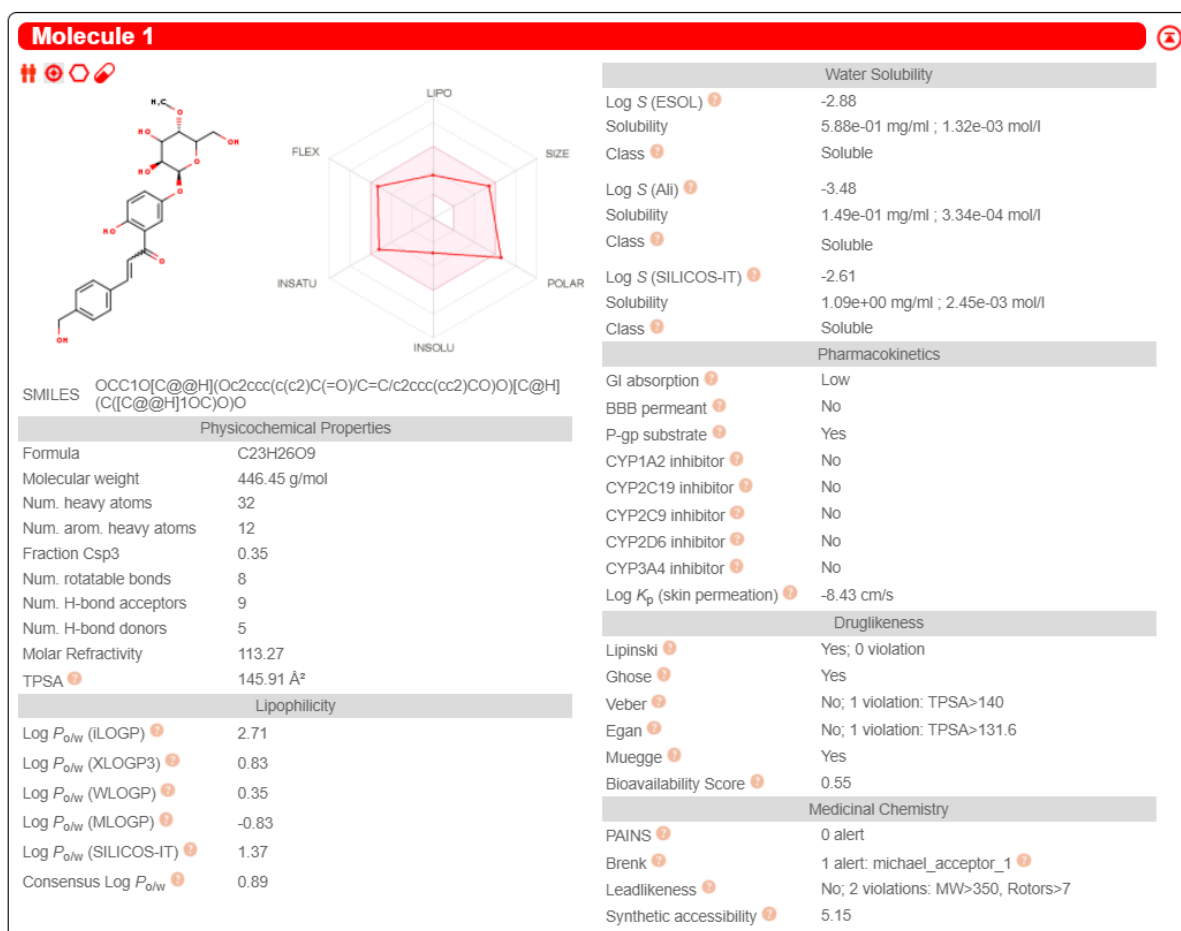

**Figure S88.** 2'-Hydroxy-4-hydroxymethylchalcone 5'-O- $\beta$ -D-(4''-O-methyl)-glucopyranoside (**3c**) physicochemical and ADME parameters prediction using the SwissADME modelling

| Pa    | Pi    | Activity                                         |
|-------|-------|--------------------------------------------------|
| 0,985 | 0,001 | Monophenol monooxygenase inhibitor               |
| 0,943 | 0,003 | Caspase 3 stimulant                              |
| 0,936 | 0,005 | CDP-glycerol glycerophosphotransferase inhibitor |
| 0,930 | 0,002 | Antiprotozoal (Leishmania)                       |
| 0,921 | 0,006 | Membrane integrity agonist                       |
| 0,915 | 0,002 | Chemopreventive                                  |
| 0,905 | 0,002 | Hepatoprotectant                                 |
| 0,897 | 0,002 | Free radical scavenger                           |
| 0,875 | 0,003 | Anticarcinogenic                                 |
| 0,875 | 0,006 | Beta-adrenergic receptor kinase inhibitor        |

**Figure S89.** 2'-Hydroxy-4-hydroxymethylchalcone 5'-O- $\beta$ -D-(4''-O-methyl)-glucopyranoside (**3c**) biological activity prediction using the Way2Drug Pass online modelling

| Name                                                 | Confidence | ChEMBL ID                     |
|------------------------------------------------------|------------|-------------------------------|
| Clostridium ramosum                                  | 0.6112     | <a href="#">CHEMBL614971</a>  |
| RESISTANT Acinetobacter pittii                       | 0.5770     | <a href="#">CHEMBL3140321</a> |
| Actinomyces meyeri                                   | 0.5592     | <a href="#">CHEMBL612289</a>  |
| Mycobacterium mageritense                            | 0.5508     | <a href="#">CHEMBL612959</a>  |
| RESISTANT Mycobacterium ulcerans                     | 0.5466     | <a href="#">CHEMBL612965</a>  |
| Clostridium cadaveris                                | 0.5462     | <a href="#">CHEMBL614970</a>  |
| Staphylococcus lugdunensis                           | 0.4424     | <a href="#">CHEMBL613303</a>  |
| RESISTANT Staphylococcus aureus subsp. aureus RN4220 | 0.4348     | <a href="#">CHEMBL2366906</a> |
| Nocardia transvalensis                               | 0.4267     | <a href="#">CHEMBL613234</a>  |
| Lactobacillus plantarum                              | 0.4205     | <a href="#">CHEMBL614973</a>  |
| Streptococcus sanguinis                              | 0.4119     | <a href="#">CHEMBL612314</a>  |
| Clostridium sordellii                                | 0.3830     | <a href="#">CHEMBL613072</a>  |
| Pseudomonas fluorescens                              | 0.3632     | <a href="#">CHEMBL612500</a>  |
| Yersinia pestis                                      | 0.3527     | <a href="#">CHEMBL614597</a>  |
| Nocardia otitidiscaviarum                            | 0.3399     | <a href="#">CHEMBL613233</a>  |

**Figure S90.** 2'-Hydroxy-4-hydroxymethylchalcone 5'-O- $\beta$ -D-(4''-O-methyl)-glucopyranoside (**3c**) antibacterial activity prediction using the Way2Drug AntiBac-Pred modelling

| Name                        | Confidence | ChEMBL ID                    |
|-----------------------------|------------|------------------------------|
| Rhizopus oryzae             | 0.3855     | <a href="#">CHEMBL612306</a> |
| Trichophyton mentagrophytes | 0.3616     | <a href="#">CHEMBL613162</a> |
| Absidia corymbifera         | 0.3575     | <a href="#">CHEMBL612369</a> |
| Aspergillus niger           | 0.1685     | <a href="#">CHEMBL358</a>    |
| Epidermophyton floccosum    | 0.1418     | <a href="#">CHEMBL612386</a> |
| Mucor                       | 0.0948     | <a href="#">CHEMBL612521</a> |
| Yarrowia lipolytica         | 0.0910     | <a href="#">CHEMBL612844</a> |
| Penicillium marneffei       | 0.0611     | <a href="#">CHEMBL612994</a> |
| Trichosporon asahii         | 0.0441     | <a href="#">CHEMBL613164</a> |
| Saccharomyces cerevisiae    | 0.0263     | <a href="#">CHEMBL361</a>    |
| Candida rugosa              | 0.0211     | <a href="#">CHEMBL612869</a> |
| Galactomyces geotrichum     | 0.0175     | <a href="#">CHEMBL613775</a> |

**Figure S91.** 2'-Hydroxy-4-hydroxymethylchalcone 5'-O- $\beta$ -D-(4''-O-methyl)-glucopyranoside (**3c**) antifungal activity prediction using the Way2Drug AntiFun-Pred modelling

| Virus                                                               | Protein target                                | Confidence |
|---------------------------------------------------------------------|-----------------------------------------------|------------|
| Severe acute respiratory syndrome coronavirus 2                     | Replicase polyprotein 1ab                     | 0.7810     |
| Human immunodeficiency virus 2                                      | Human immunodeficiency virus type 2 integrase | 0.2266     |
| Varicella-zoster virus (strain Dumas) (HHV-3) (Human herpesvirus 3) | Thymidine kinase                              | 0.0086     |
| Influenza A virus                                                   | Neuraminidase                                 | 0.0031     |

**Figure S92.** 2'-Hydroxy-4-hydroxymethylchalcone 5'-O- $\beta$ -D-(4''-O-methyl)-glucopyranoside (**3c**) antiviral activity prediction using the Way2Drug AntiVir-Pred modelling

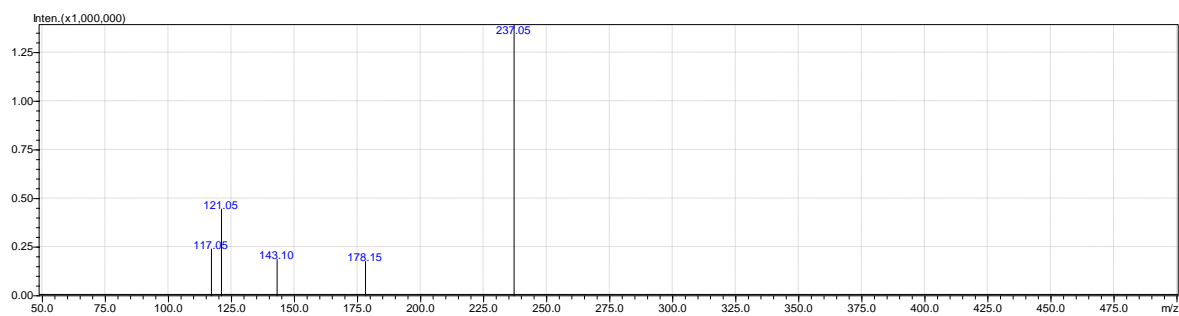

**Figure S93.** MS analysis of 4'-methoxyflavone (5)

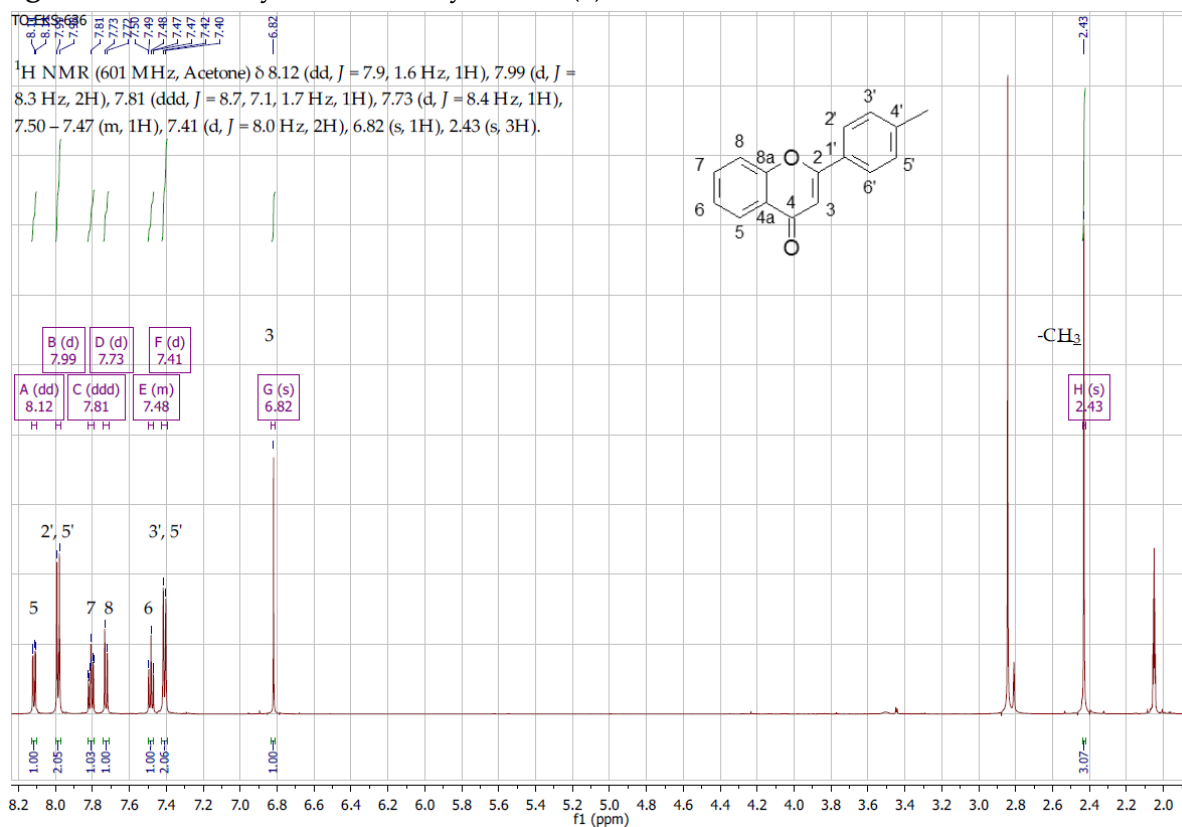

**Figure S94.** <sup>1</sup>H NMR spectrum (δ, acetone-d<sub>6</sub>, 600 MHz) of 4'-methoxyflavone (5)

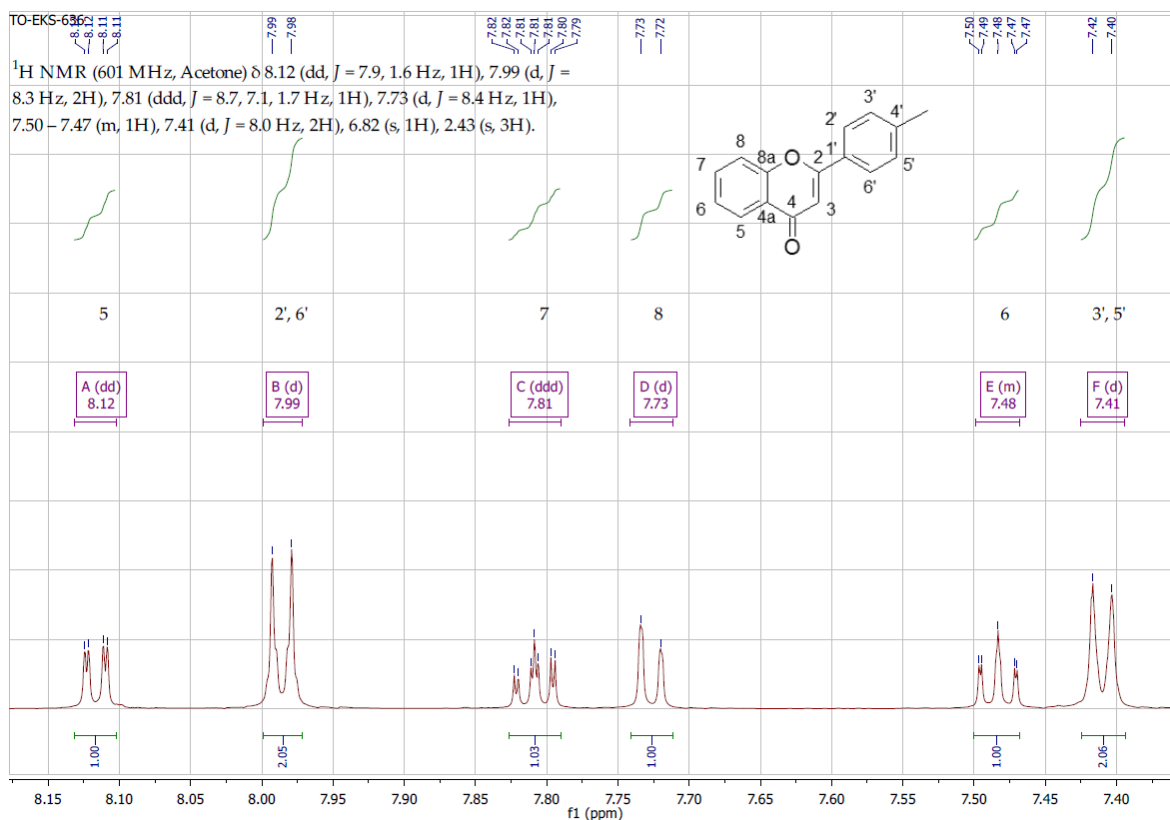

**Figure S95.** <sup>1</sup>H NMR spectrum expansion (δ, acetone-d<sub>6</sub>, 600 MHz) of 4'-methyflavone (5)

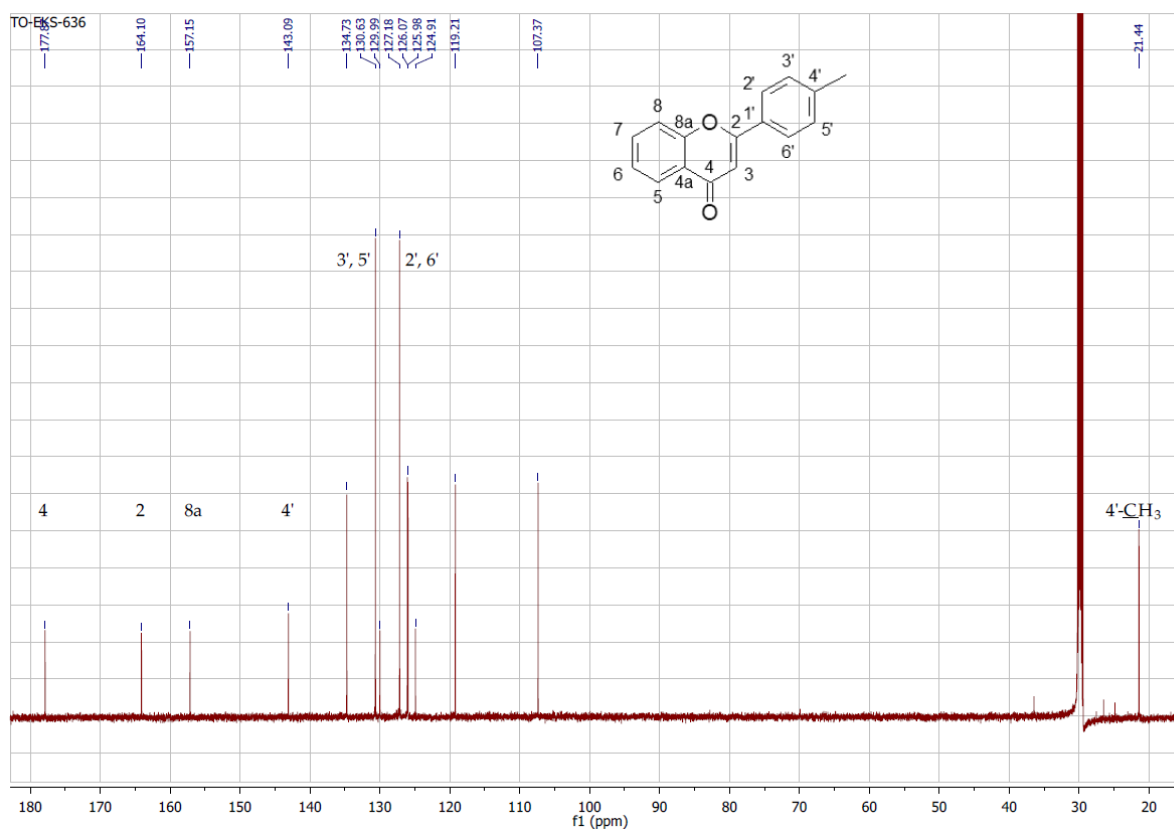

**Figure S96.** <sup>13</sup>C NMR spectrum (δ, acetone-d<sub>6</sub>, 151 MHz) of 4'-methyflavone (5)

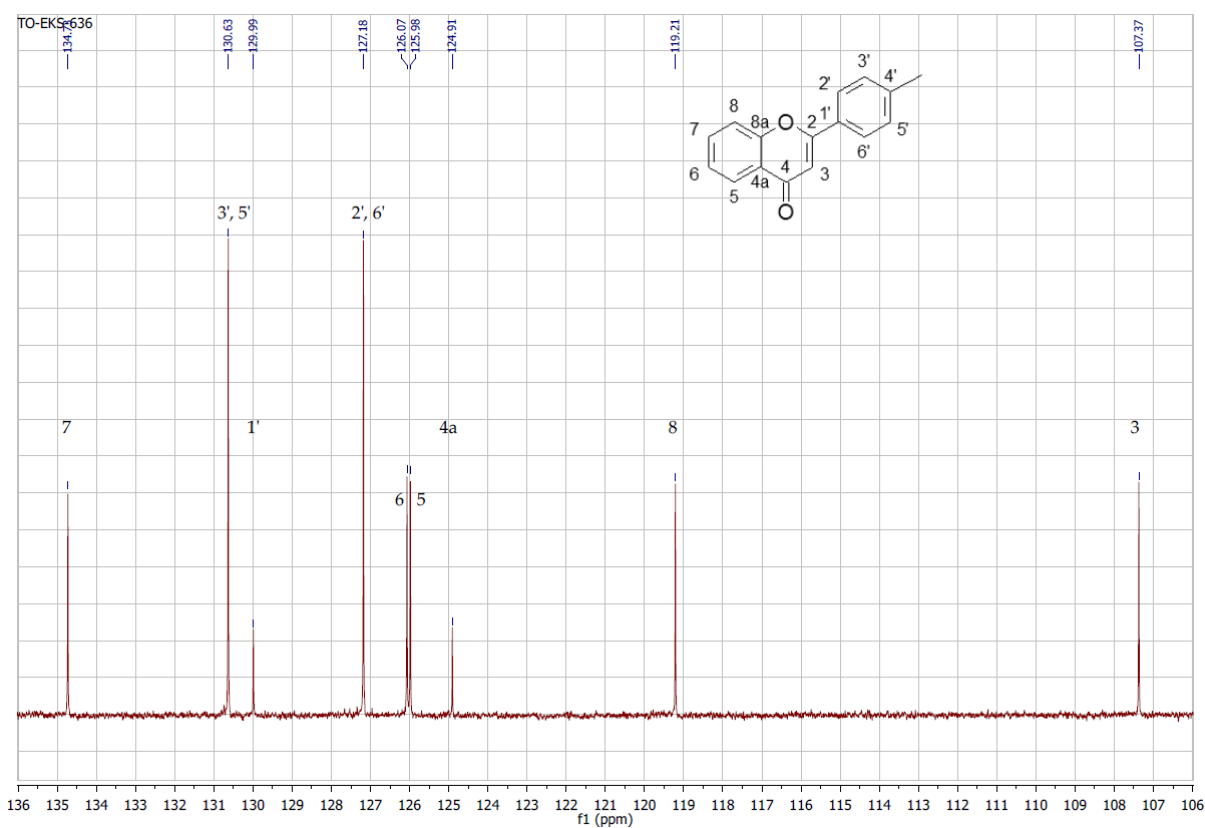

**Figure S97.**  $^{13}\text{C}$  NMR spectrum expansion ( $\delta$ , acetone- $d_6$ , 151 MHz) of 4'-methyflavone (5)

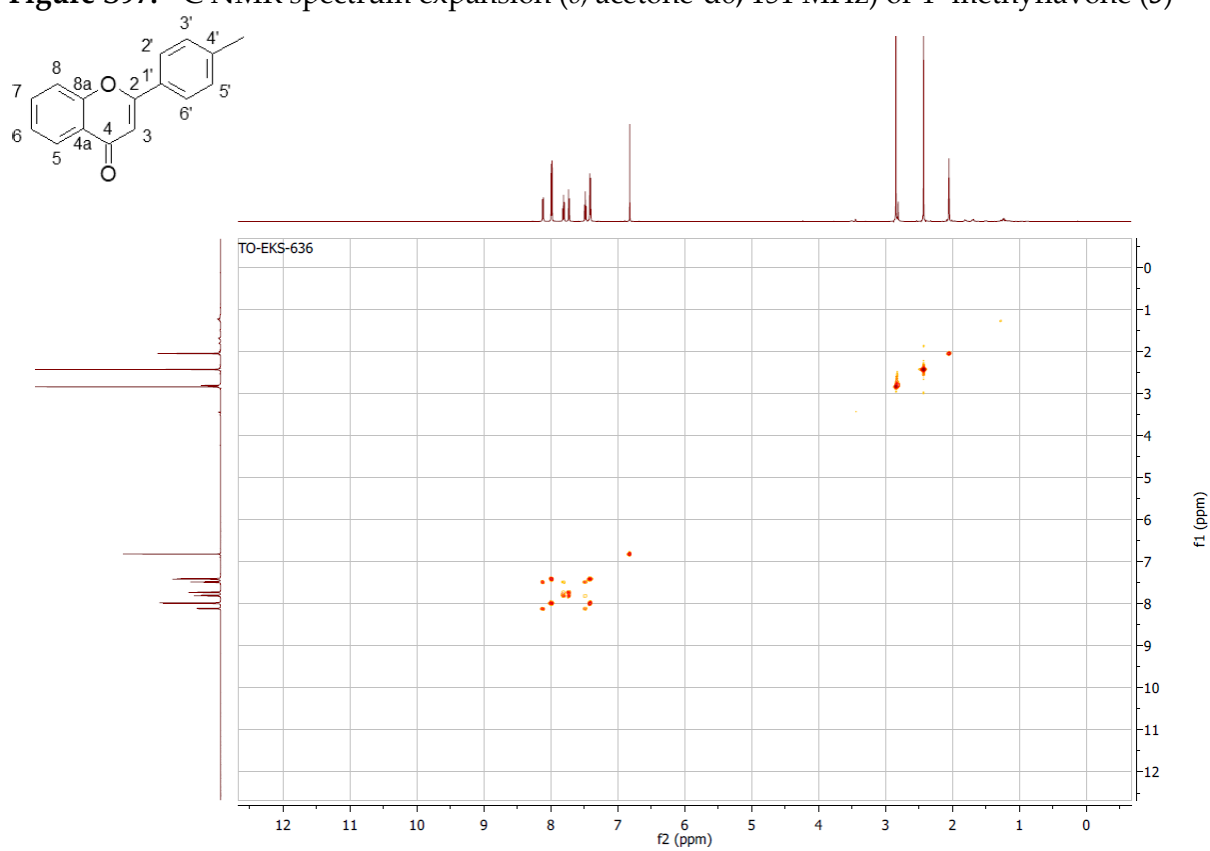

**Figure S98.** COSY contour map –  $^1\text{H} \times ^1\text{H}$  of 4'-methyflavone (5)

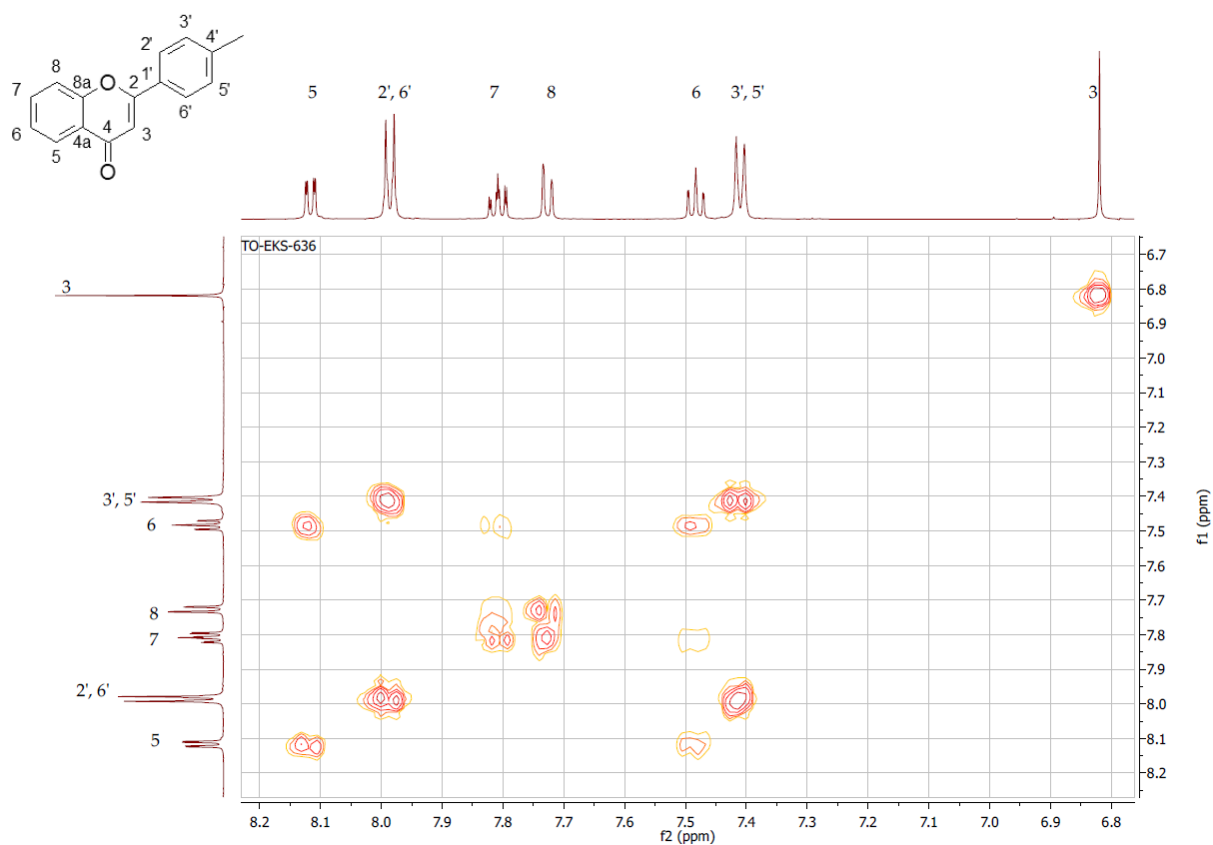

Figure S99. COSY contour map –  $^1\text{H} \times ^1\text{H}$  expansion of 4'-methyflavone (5)

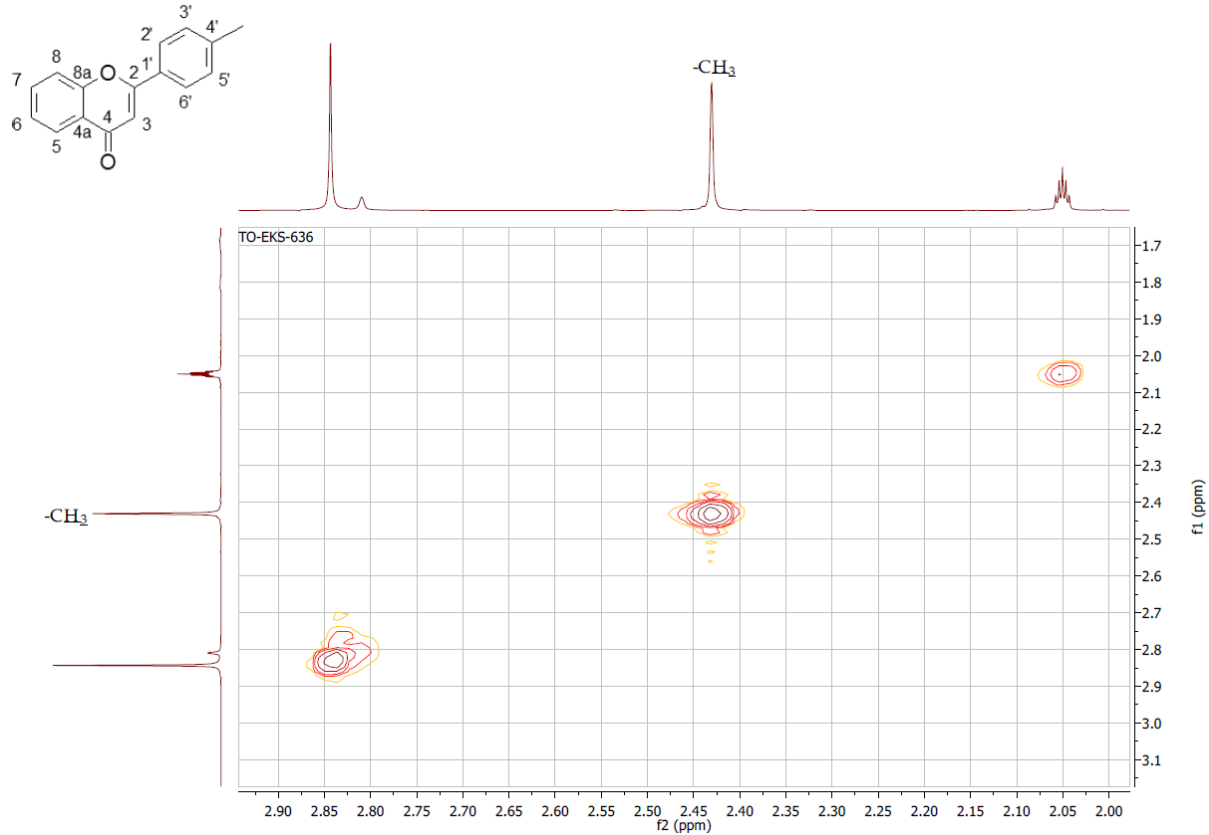

Figure S100. COSY contour map –  $^1\text{H} \times ^1\text{H}$  expansion of 4'-methyflavone (5)

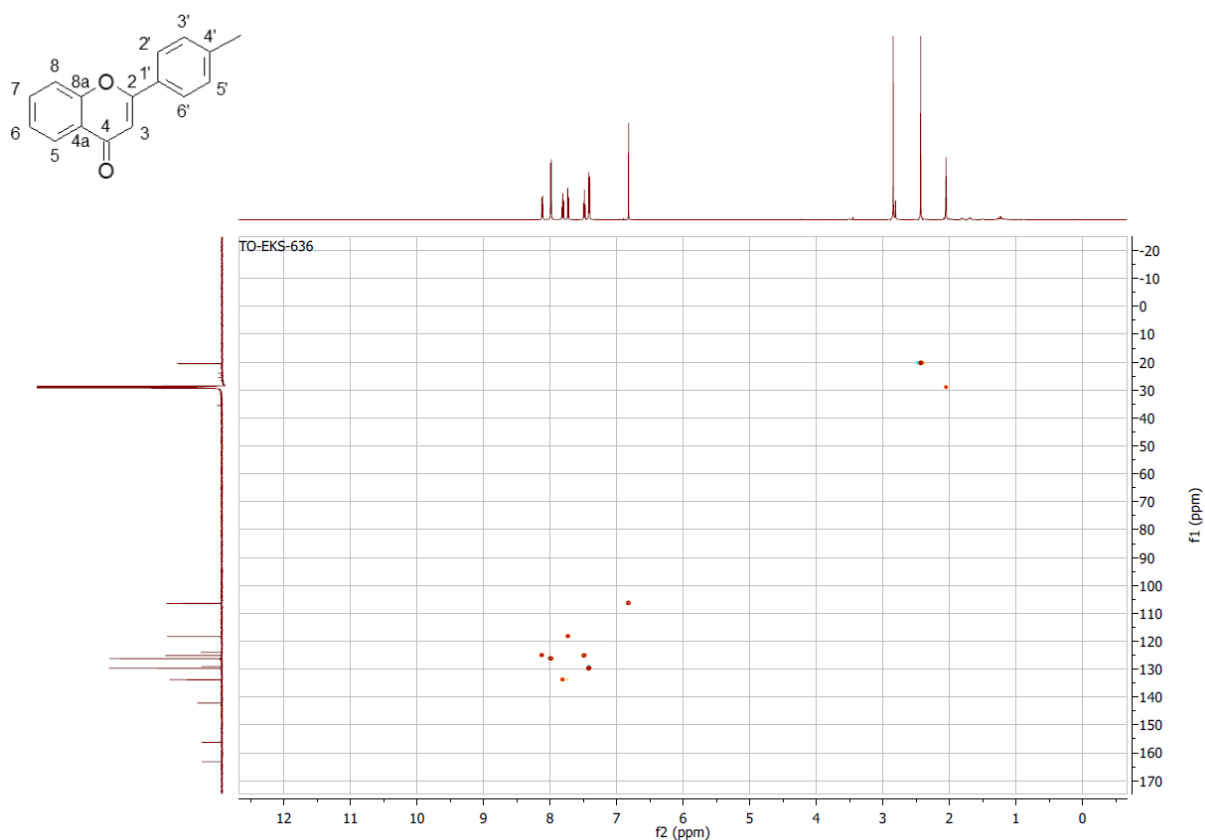

**Figure S101.** HSQC contour map –  $^1\text{H} \times ^{13}\text{C}$  of 4'-methoxyflavone (5)

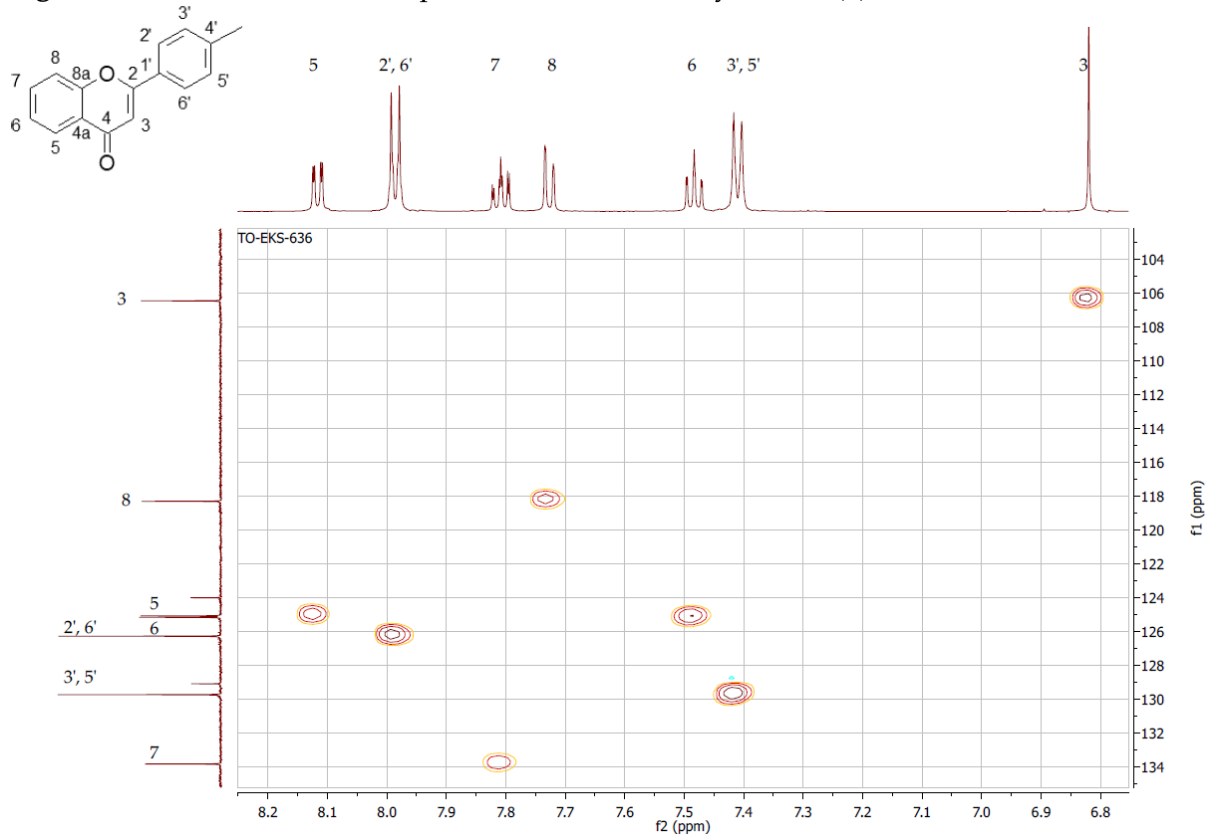

**Figure S102.** HSQC contour map –  $^1\text{H} \times ^{13}\text{C}$  expansion of 4'-methoxyflavone (5)

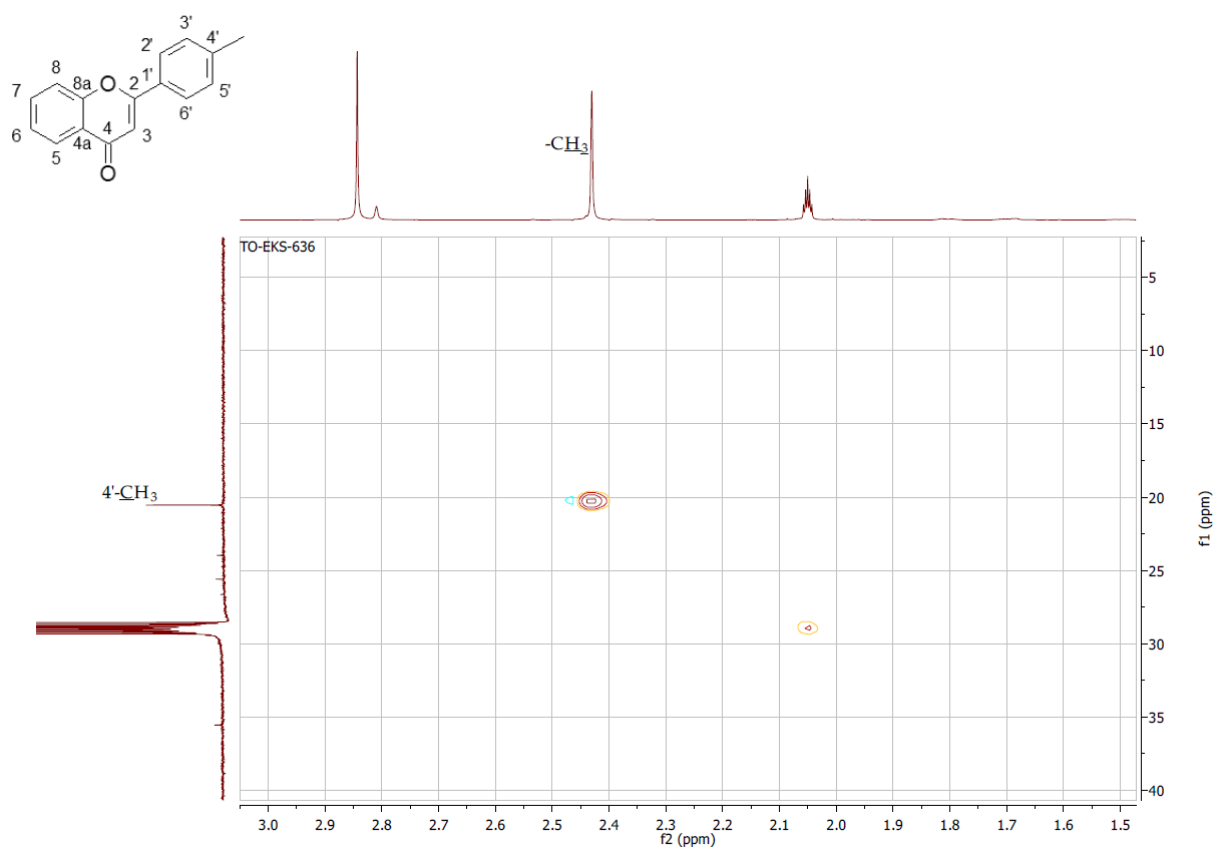

**Figure S103.** HSQC contour map –  $^1\text{H} \times ^{13}\text{C}$  expansion of 4'-methoxyflavone (5)

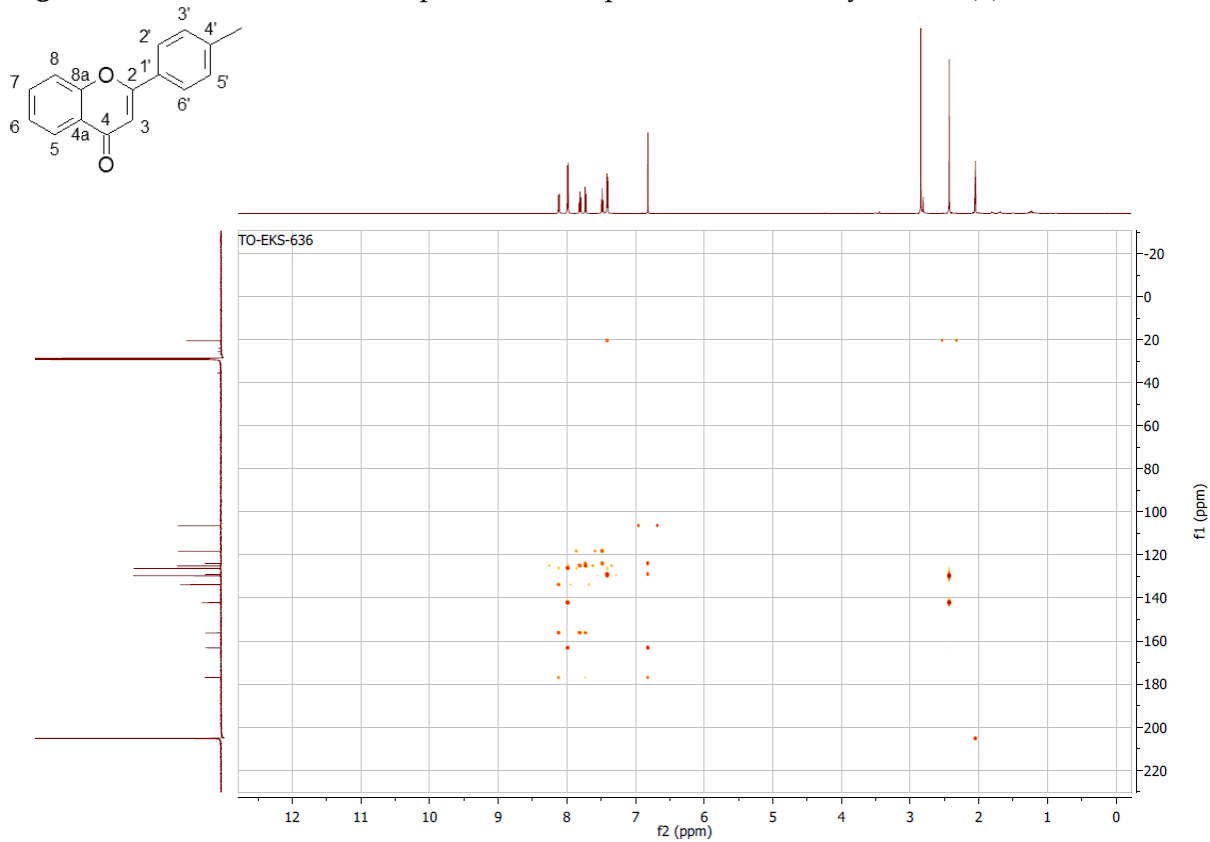

**Figure S104.** HMBC contour map –  $^1\text{H} \times ^{13}\text{C}$  of 4'-methoxyflavone (5)



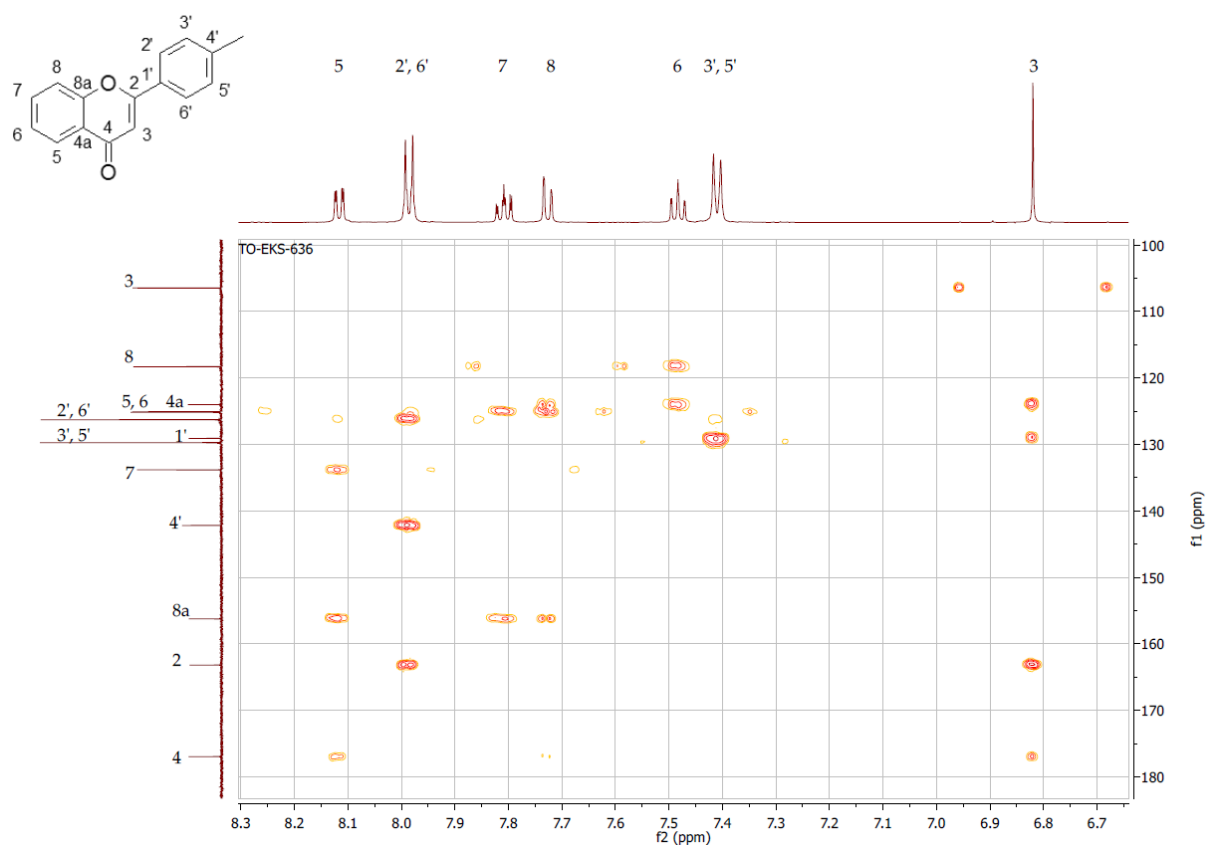

**Figure S105.** HMBC contour map –  $^1\text{H} \times ^{13}\text{C}$  expansion of 4'-methyflavone (5)

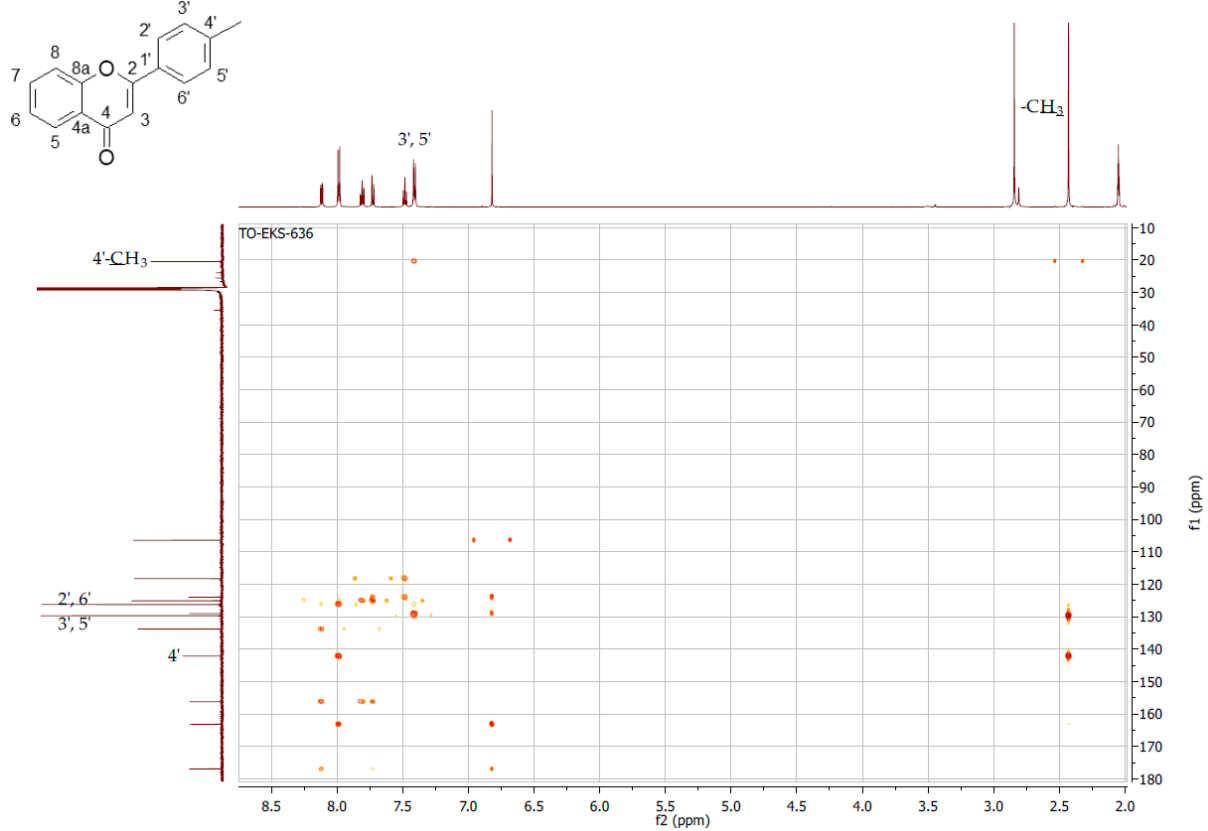

**Figure S106.** HMBC contour map –  $^1\text{H} \times ^{13}\text{C}$  expansion of 4'-methyflavone (5)

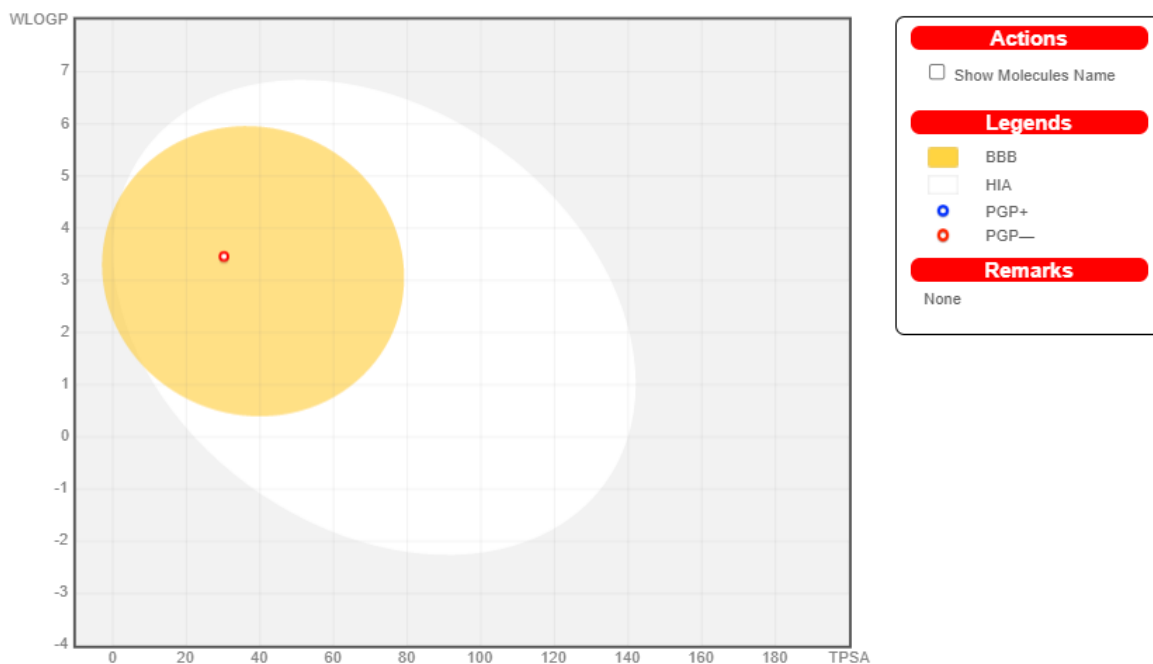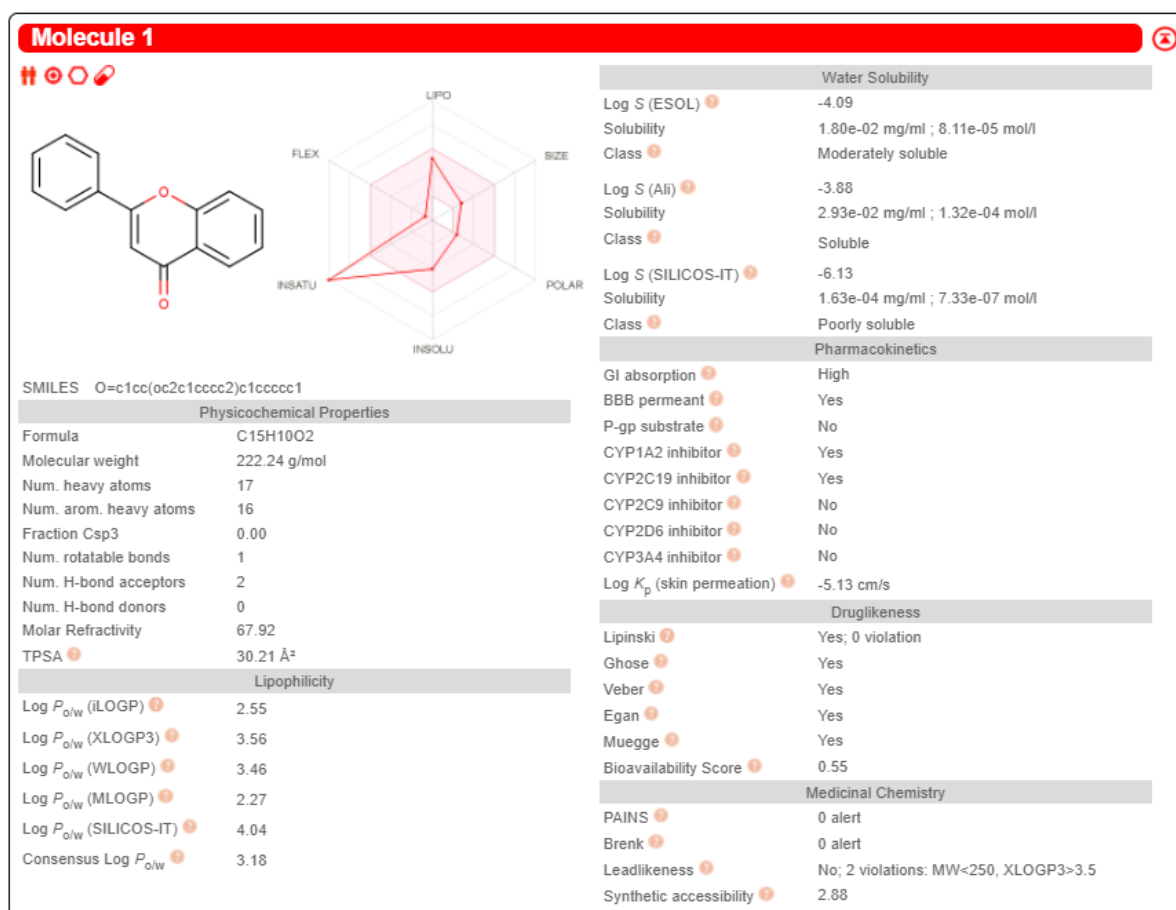

**Figure S107.** 4'-Methylflavone (5) physicochemical and ADME parameters prediction using the SwissADME modelling

| Pa    | Pi    | Activity                                             |
|-------|-------|------------------------------------------------------|
| 0,952 | 0,001 | 4-Nitrophenol 2-monooxygenase inhibitor              |
| 0,952 | 0,003 | HIF1A expression inhibitor                           |
| 0,947 | 0,004 | Membrane integrity agonist                           |
| 0,943 | 0,002 | 27-Hydroxycholesterol 7alpha-monooxygenase inhibitor |
| 0,938 | 0,002 | Kinase inhibitor                                     |
| 0,933 | 0,002 | Cholestanetriol 26-monooxygenase inhibitor           |
| 0,929 | 0,003 | Anaphylatoxin receptor antagonist                    |
| 0,914 | 0,003 | Membrane permeability inhibitor                      |
| 0,913 | 0,004 | Chlordecone reductase inhibitor                      |
| 0,913 | 0,009 | CYP2C12 substrate                                    |

**Figure S108.** 4'-Methyflavone (5) physicochemical biological activity prediction using the Way2Drug Pass online modelling

| Name                                              | Confidence | ChEMBL ID     |
|---------------------------------------------------|------------|---------------|
| Yersinia pestis                                   | 0.5183     | ChEMBL614597  |
| Pseudomonas fluorescens                           | 0.3605     | ChEMBL612500  |
| Streptococcus pneumoniae R6                       | 0.2974     | ChEMBL2366794 |
| RESISTANT Burkholderia pseudomallei               | 0.2655     | ChEMBL3140323 |
| Salmonella enterica subsp. enterica               | 0.2594     | ChEMBL613044  |
| Bacillus subtilis subsp. subtilis str. 168        | 0.2582     | ChEMBL613315  |
| RESISTANT Staphylococcus aureus subsp. aureus MW2 | 0.2508     | ChEMBL612531  |
| Bacillus thuringiensis                            | 0.2000     | ChEMBL614959  |
| Mycobacterium                                     | 0.1962     | ChEMBL614981  |
| Mycobacterium aurum                               | 0.1864     | ChEMBL612952  |
| Bacillus subtilis                                 | 0.1846     | ChEMBL359     |
| RESISTANT Bacillus subtilis                       | 0.1758     | ChEMBL359     |
| RESISTANT Helicobacter pylori                     | 0.1413     | ChEMBL612600  |
| Bacillus anthracis                                | 0.1376     | ChEMBL613904  |
| Nocardia nova                                     | 0.1339     | ChEMBL612977  |

**Figure S109.** 4'-Methyflavone (5) antibacterial activity prediction using the Way2Drug AntiBac-Pred modelling

| Name                     | Confidence | ChEMBL ID    |
|--------------------------|------------|--------------|
| Epidermophyton floccosum | 0.3025     | ChEMBL612386 |
| Arthroderma benhamiae    | 0.0147     | ChEMBL346    |

**Figure S110.** 4'-Methyflavone (5) antifungal activity prediction using the Way2Drug AntiFun-Pred modelling

| Virus                                                                                  | Protein target                                | Confidence |
|----------------------------------------------------------------------------------------|-----------------------------------------------|------------|
| Human immunodeficiency virus 2                                                         | Human immunodeficiency virus type 2 integrase | 0.8508     |
| Severe acute respiratory syndrome coronavirus 2                                        | Replicase polyprotein 1ab                     | 0.6456     |
| Dengue virus type 2                                                                    | Genome polyprotein                            | 0.4865     |
| Vaccinia virus<br>(strain Western Reserve)<br>(VACV)<br>(Vaccinia virus<br>(strainWR)) | DNA polymerase                                | 0.4125     |
| SARS coronavirus                                                                       | SARS coronavirus 3C-like proteinase           | 0.2286     |
| Varicella-zoster virus<br>(strain Dumas)<br>(HHV-3)<br>(Human herpesvirus 3)           | DNA polymerase                                | 0.2173     |
| Herpes simplex virus<br>(type 1 / strain 17)                                           | Human herpesvirus 1 DNA polymerase            | 0.2173     |
| Infectious bronchitis virus                                                            | 3C-like protease                              | 0.1764     |
| SARS coronavirus                                                                       | Replicase polyprotein 1ab                     | 0.1489     |

**Figure S111.** 4'-Methyflavone (5) antiviral activity prediction using the Way2Drug AntiVir-Pred modelling

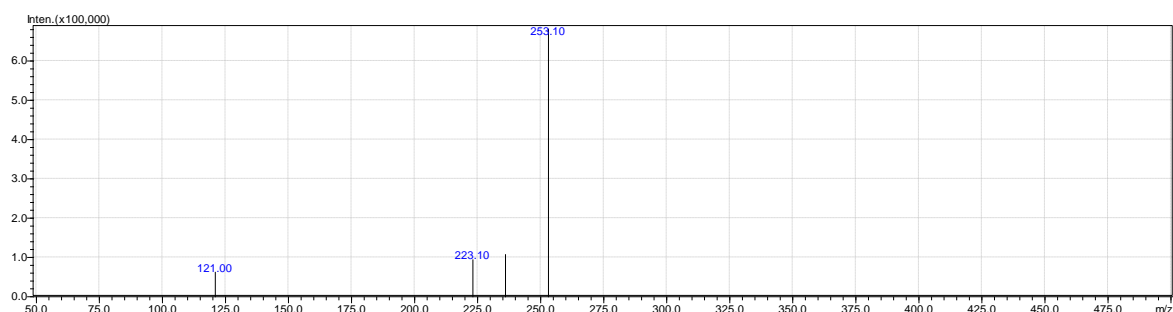

**Figure S112.** MS analysis 4'-hydroxymethylflavone (5a)

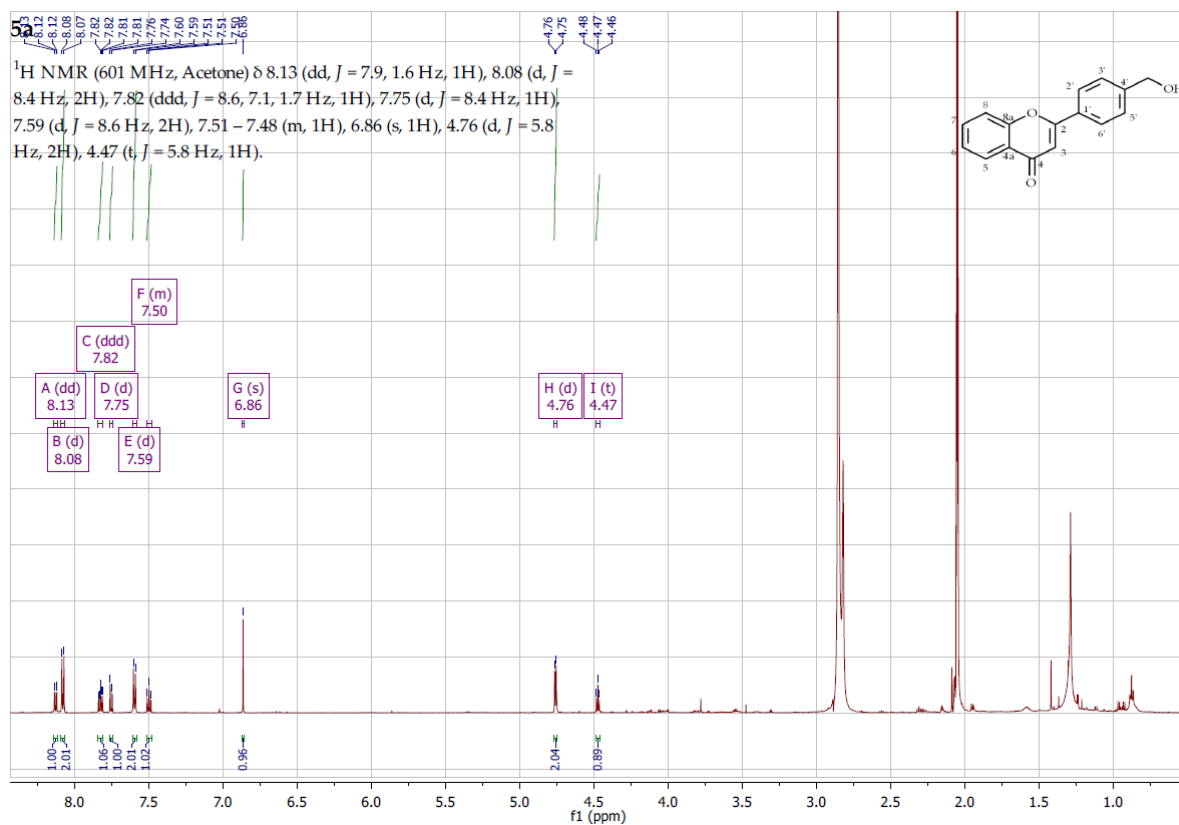

**Figure S113.** <sup>1</sup>H NMR spectrum (δ, acetone-d<sub>6</sub>, 600 MHz) of 4'-hydroxymethylflavone (5a)

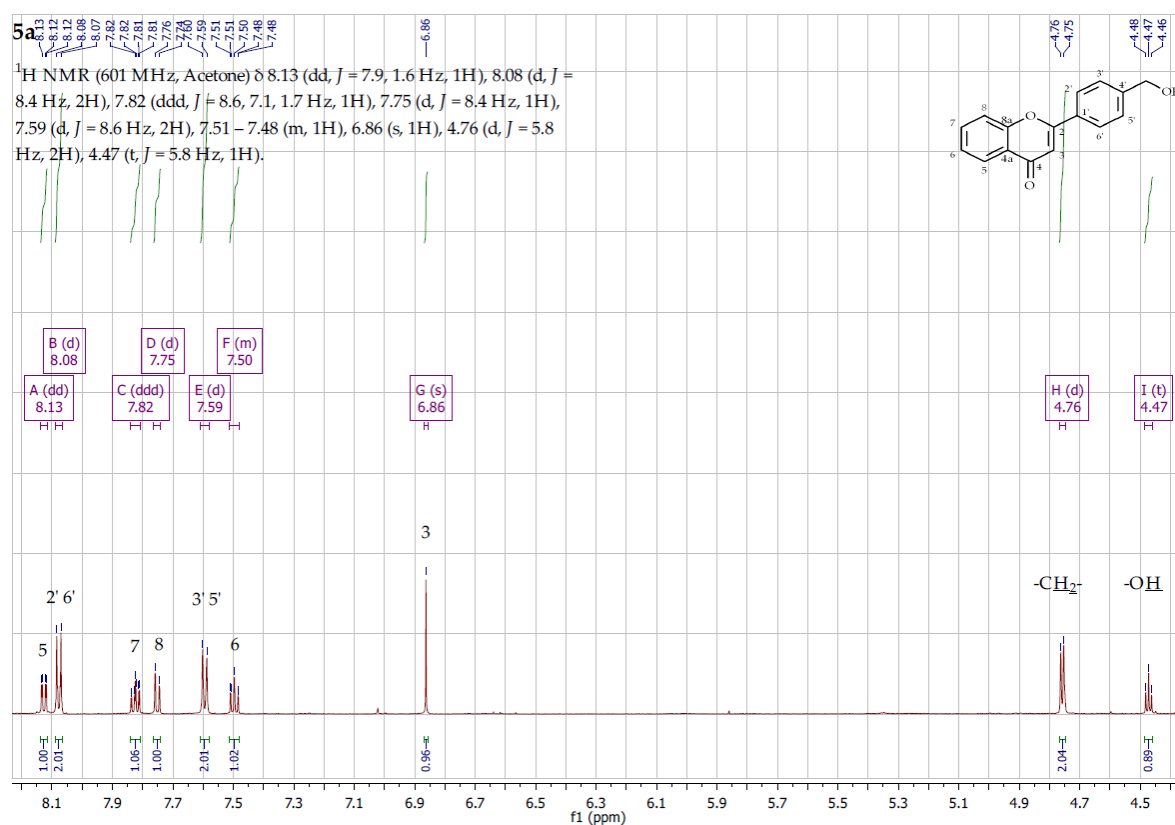

**Figure S114.** <sup>1</sup>H NMR spectrum expansion ( $\delta$ , acetone- $d_6$ , 600 MHz) of 4'-hydroxymethylflavone (**5a**)

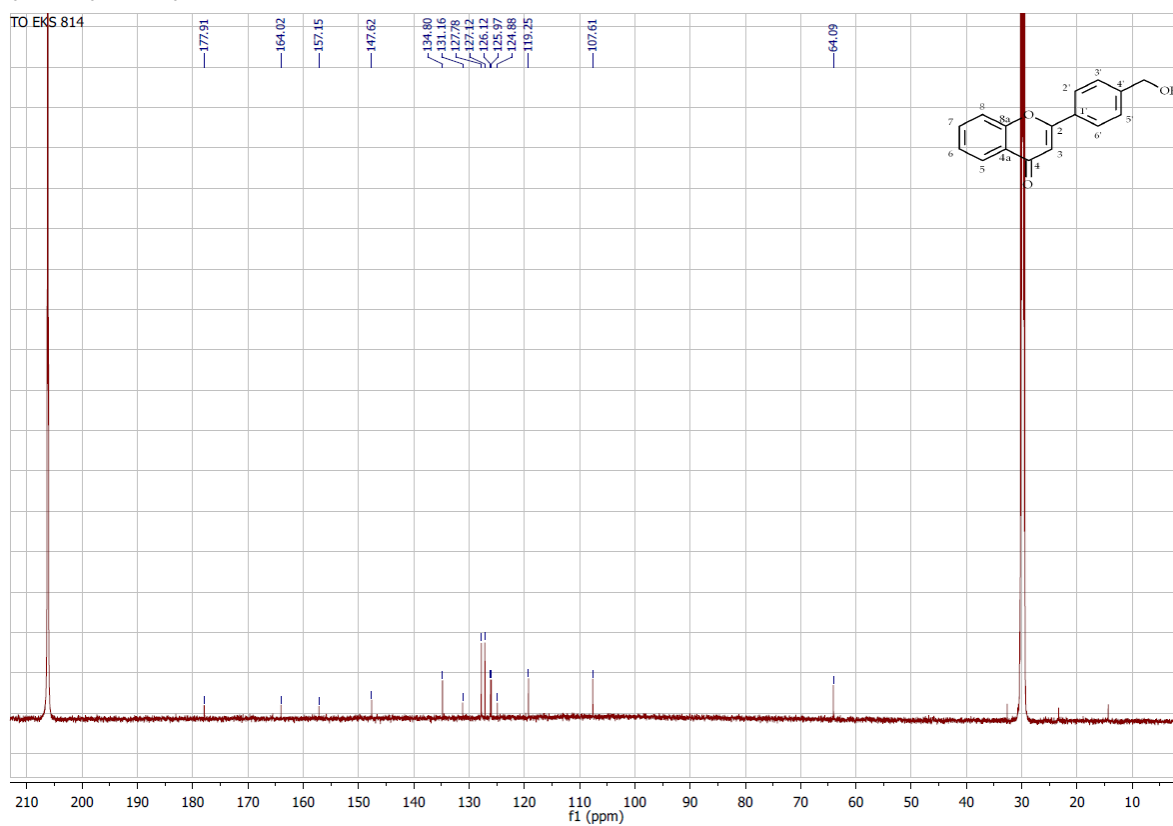

**Figure S115.** <sup>13</sup>C NMR spectrum expansion ( $\delta$ , acetone- $d_6$ , 151 MHz) of 4'-hydroxymethylflavone (**5a**)

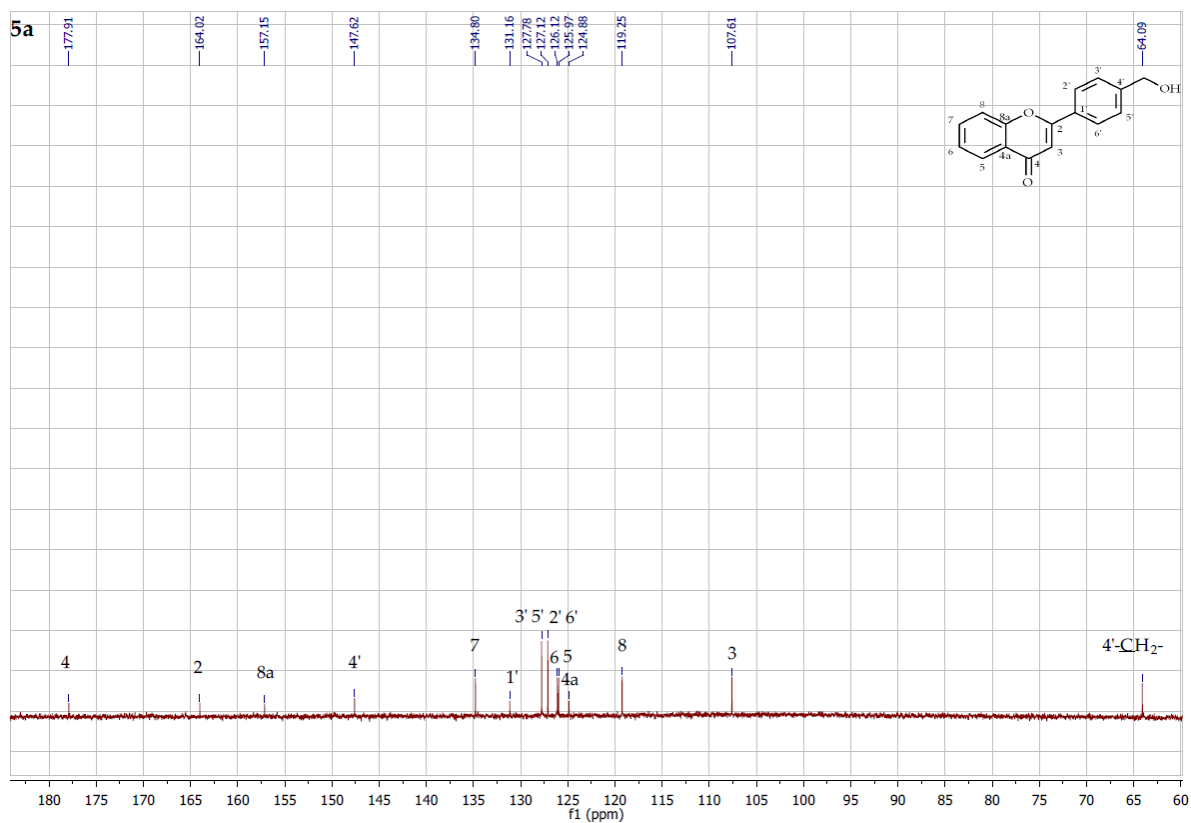

**Figure S116.**  $^{13}\text{C}$  NMR spectrum expansion ( $\delta$ , acetone- $\text{d}_6$ , 151 MHz) of 4'-hydroxymethylflavone (**5a**)

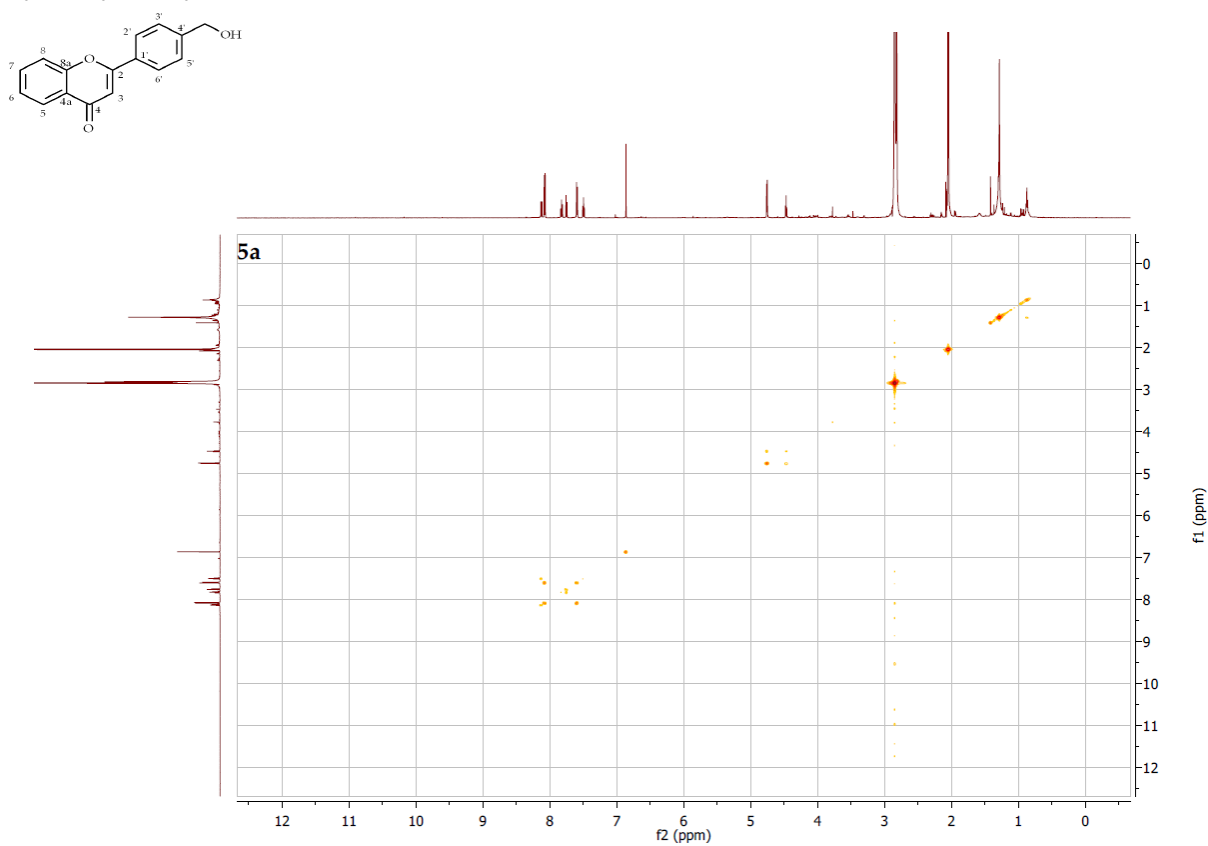

**Figure S117.** COSY contour map –  $^1\text{H} \times ^1\text{H}$  of 4'-hydroxymethylflavone (**5a**)

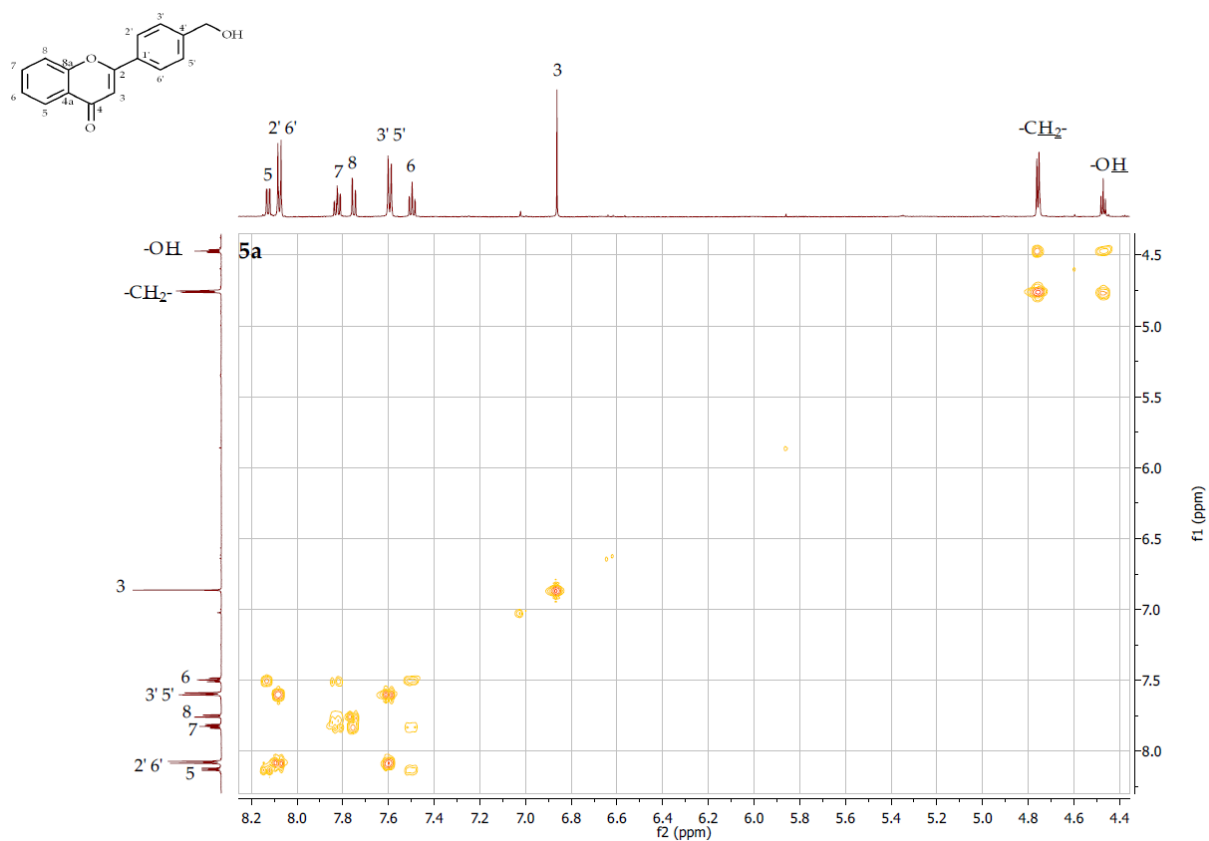

**Figure S118.** COSY contour map –  $^1\text{H} \times ^1\text{H}$  expansion of 4'-hydroxymethylflavone (5a)

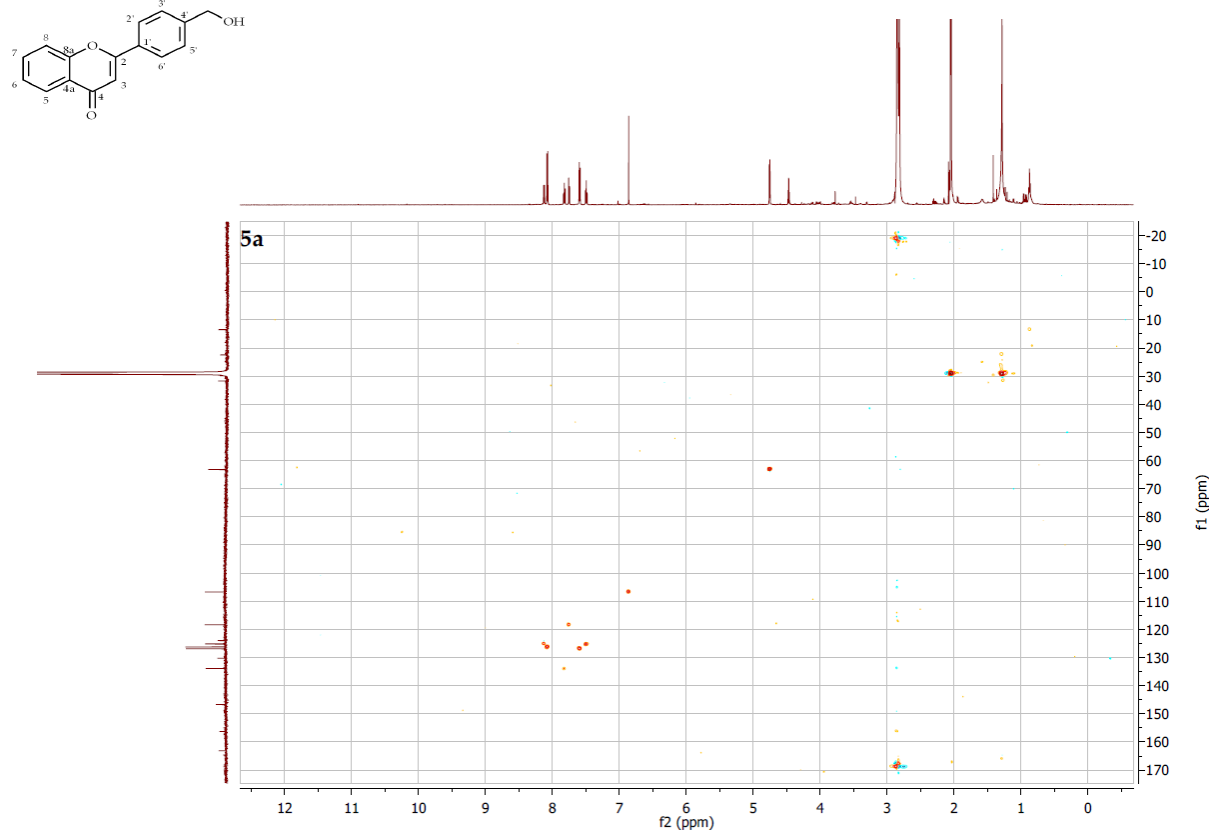

**Figure S119.** HSQC contour map –  $^1\text{H} \times ^{13}\text{C}$  of 4'-hydroxymethylflavone (5a)

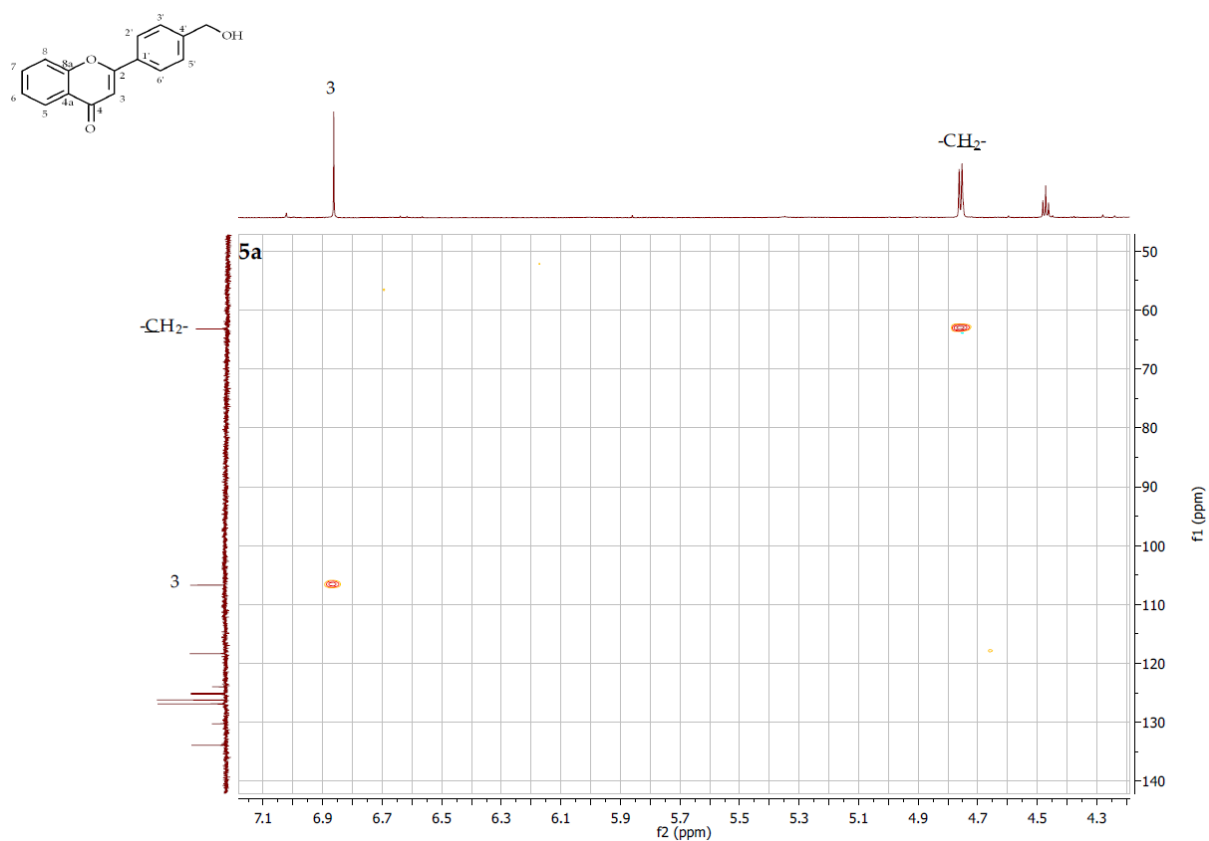

**Figure S120.** HSQC contour map – <sup>1</sup>H x <sup>13</sup>C expansion of 4'-hydroxymethylflavone (5a)

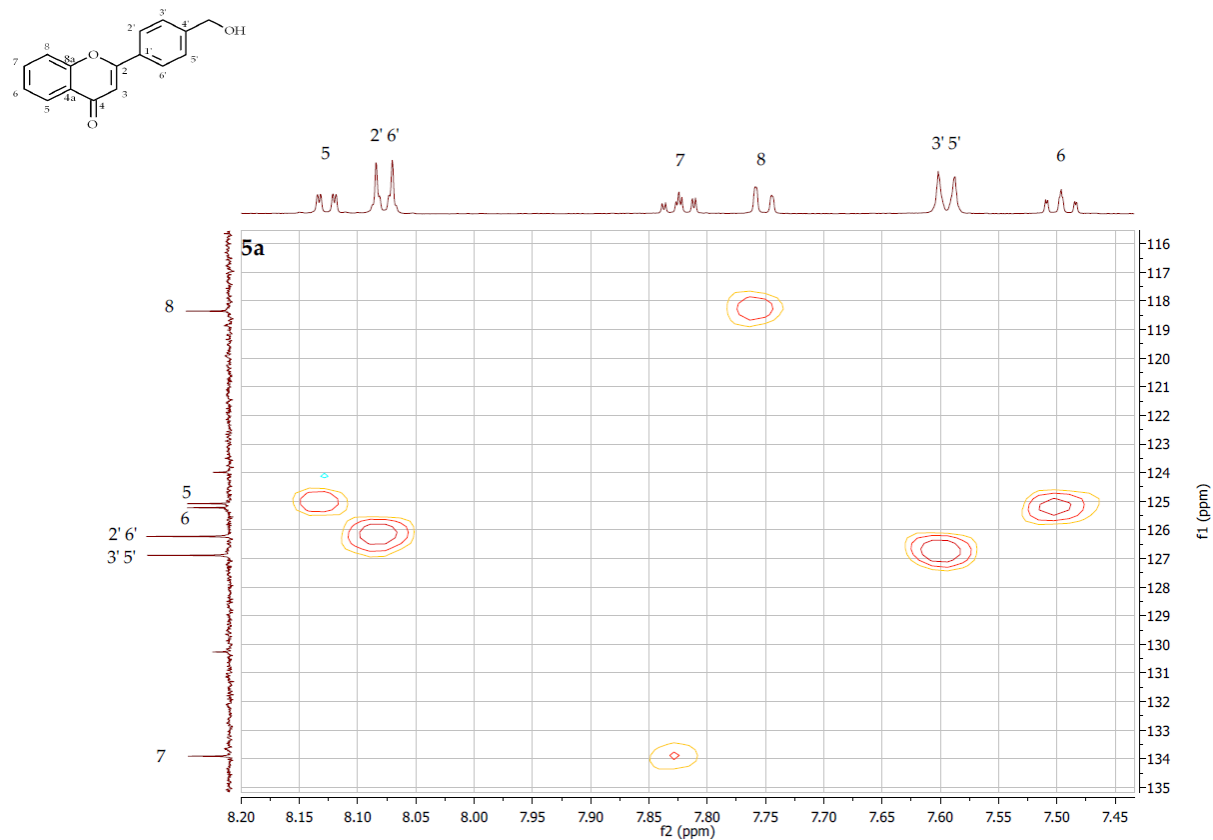

**Figure S121.** HSQC contour map – <sup>1</sup>H x <sup>13</sup>C expansion of 4'-hydroxymethylflavone (5a)



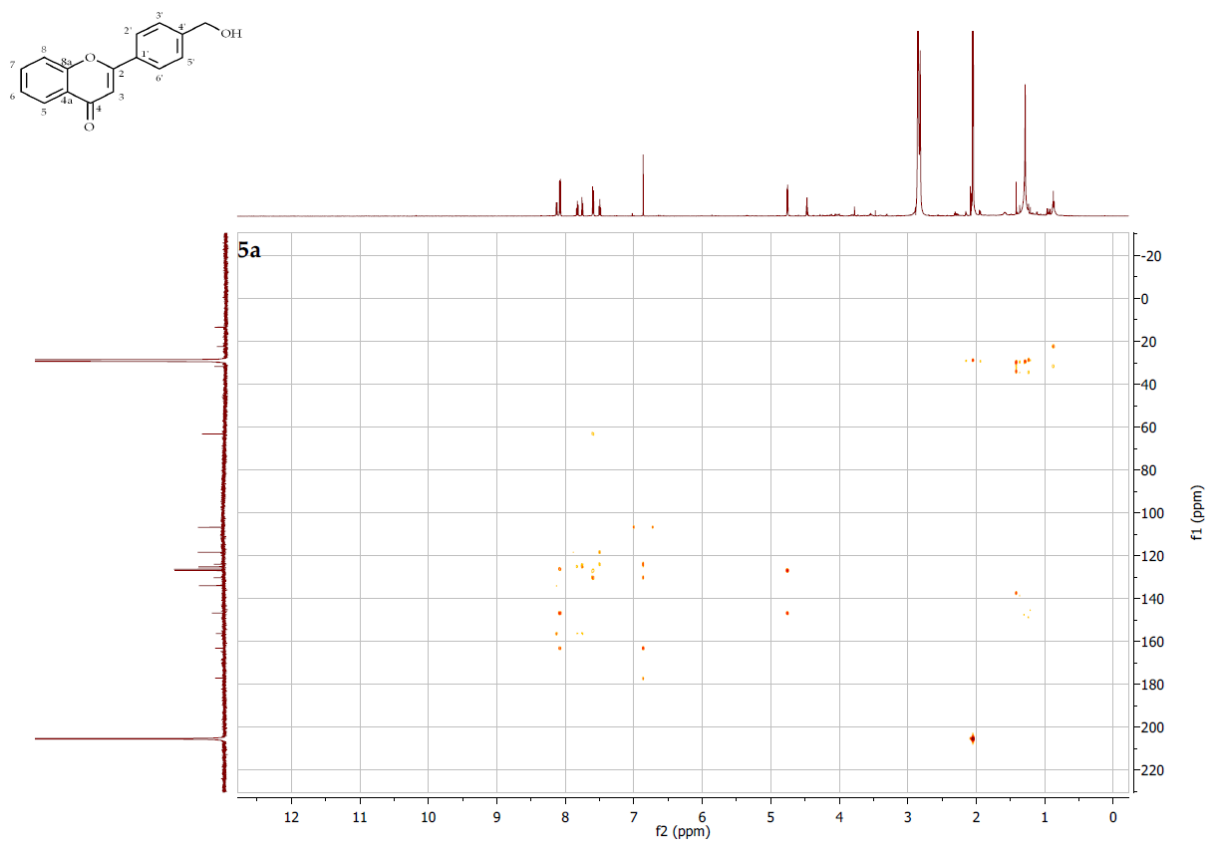

**Figure S122.** HMBC contour map –  $^1\text{H} \times ^{13}\text{C}$  of 4'-hydroxymethylflavone (**5a**)

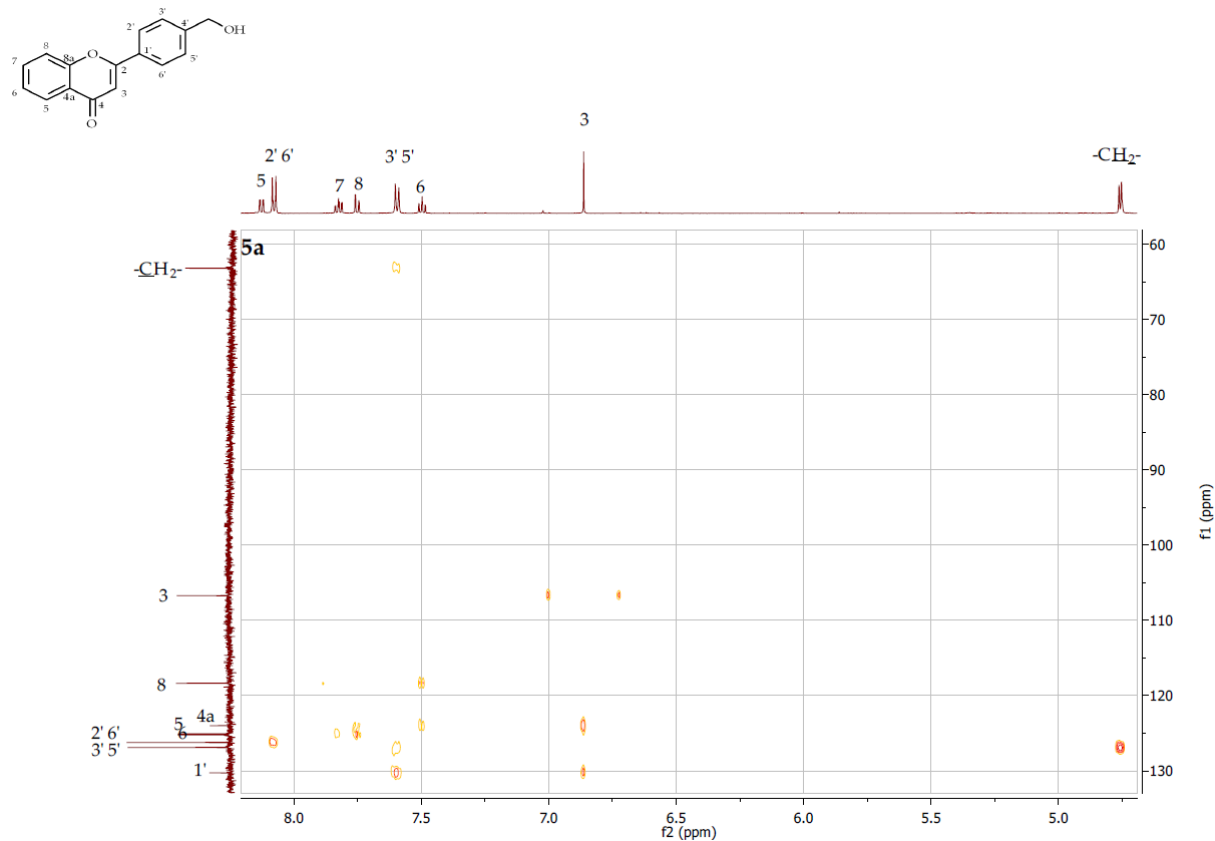

**Figure S123.** HMBC contour map –  $^1\text{H} \times ^{13}\text{C}$  expansion of 4'-hydroxymethylflavone (**5a**)

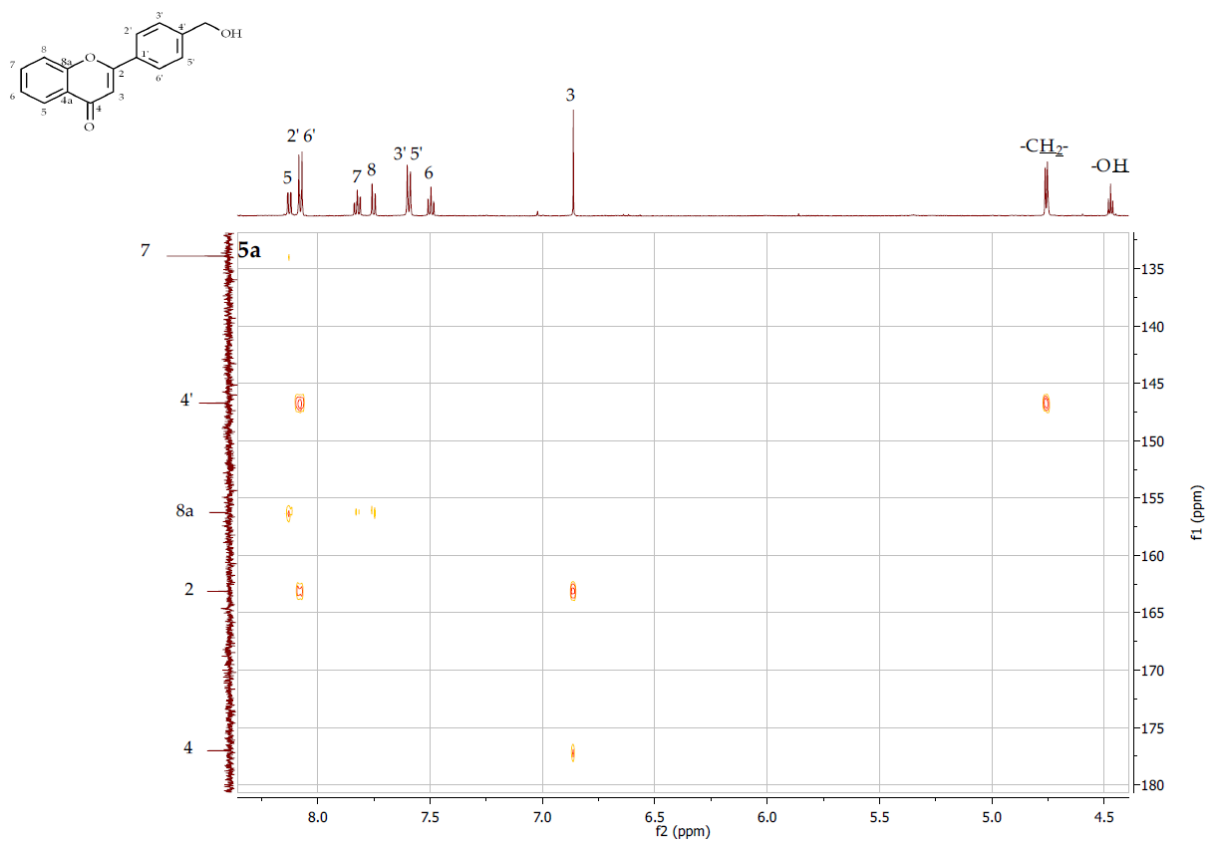

**Figure S124.** HMBC contour map –  $^1\text{H} \times ^{13}\text{C}$  expansion of 4'-hydroxymethylflavone (5a)

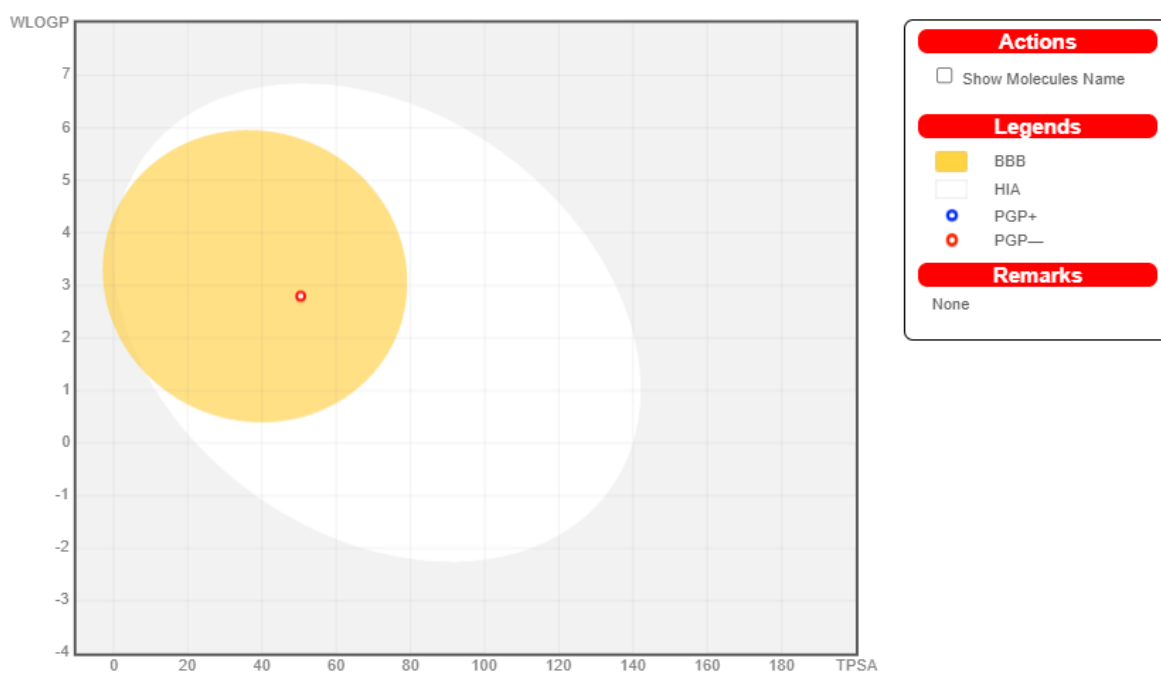

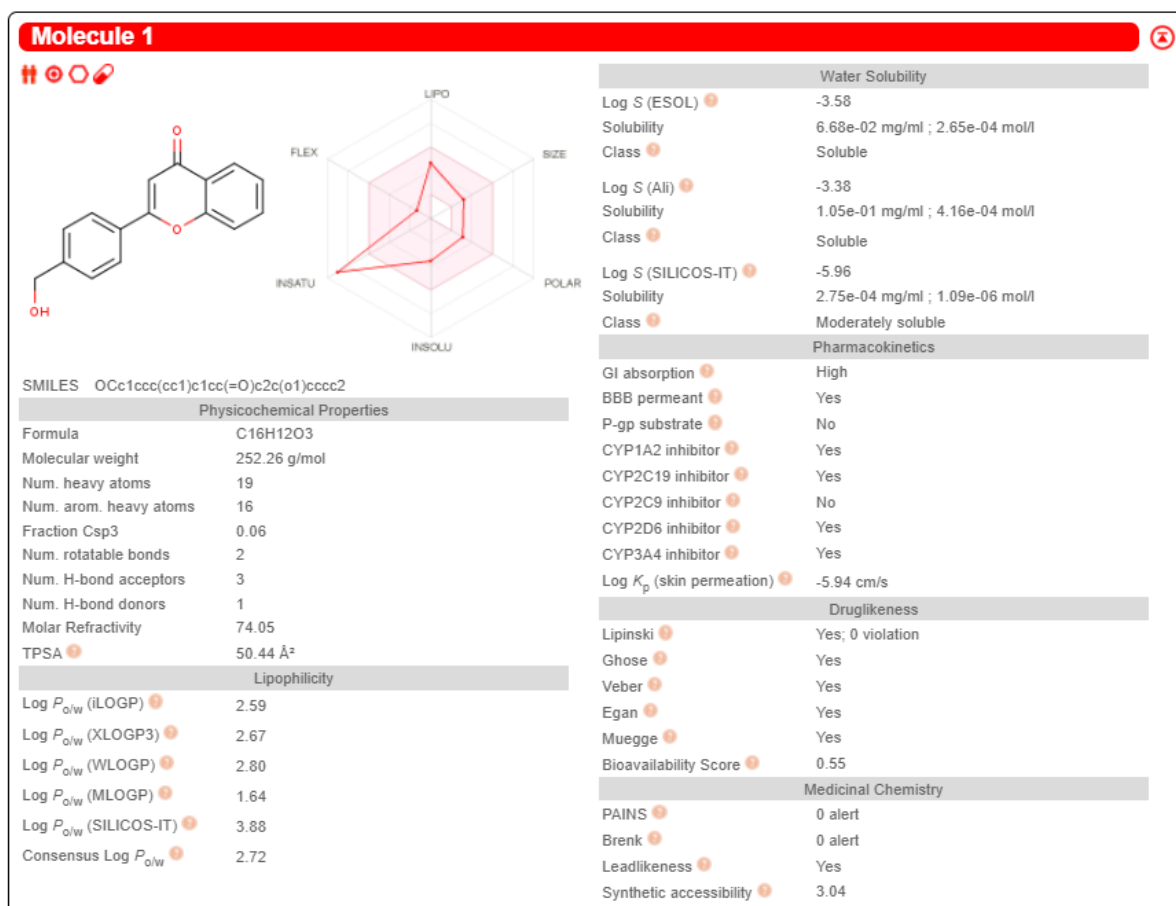

**Figure S125.** 4'-Hydroxymethylflavone (5a) physicochemical and ADME parameters prediction using the SwissADME modelling

| Pa    | Pi    | Activity                                             |
|-------|-------|------------------------------------------------------|
| 0,935 | 0,005 | Membrane integrity agonist                           |
| 0,915 | 0,002 | 4-Nitrophenol 2-monooxygenase inhibitor              |
| 0,911 | 0,005 | HIF1A expression inhibitor                           |
| 0,892 | 0,003 | 27-Hydroxycholesterol 7alpha-monooxygenase inhibitor |
| 0,893 | 0,005 | Chlordecone reductase inhibitor                      |
| 0,882 | 0,003 | Cholestanetriol 26-monooxygenase inhibitor           |
| 0,881 | 0,004 | Membrane permeability inhibitor                      |
| 0,879 | 0,005 | Anaphylatoxin receptor antagonist                    |
| 0,871 | 0,004 | Kinase inhibitor                                     |
| 0,867 | 0,003 | CYP2B5 substrate                                     |

**Figure S126.** 4'-Hydroxymethylflavone (5a) biological activity prediction using the Way2Drug Pass online modelling

| Name                                       | Confidence | ChEMBL ID     |
|--------------------------------------------|------------|---------------|
| Yersinia pestis                            | 0.4722     | CHEMBL614597  |
| Pseudomonas fluorescens                    | 0.3556     | CHEMBL612500  |
| Streptococcus pneumoniae R6                | 0.2843     | CHEMBL2366794 |
| Bacillus thuringiensis                     | 0.2651     | CHEMBL614959  |
| RESISTANT Burkholderia pseudomallei        | 0.2610     | CHEMBL3140323 |
| Bacillus subtilis subsp. subtilis str. 168 | 0.2315     | CHEMBL613315  |
| Salmonella enterica subsp. enterica        | 0.2286     | CHEMBL613044  |
| Mycobacterium mageritense                  | 0.2285     | CHEMBL612959  |
| RESISTANT Acinetobacter pittii             | 0.1785     | CHEMBL3140321 |
| Mycobacterium                              | 0.1509     | CHEMBL614981  |
| Kocuria rhizophila                         | 0.1496     | CHEMBL1075349 |
| RESISTANT Bacillus anthracis               | 0.1463     | CHEMBL613904  |
| Mycobacterium aurum                        | 0.1449     | CHEMBL612952  |
| Helicobacter pylori SS1                    | 0.1227     | CHEMBL613197  |
| RESISTANT Enterobacter                     | 0.1212     | CHEMBL614439  |

**Figure S127.** 4'-Hydroxymethylflavone (**5a**) antibacterial activity prediction using the Way2Drug AntiBac-Pred modelling

| Name                     | Confidence | ChEMBL ID    |
|--------------------------|------------|--------------|
| Yarrowia lipolytica      | 0.1471     | CHEMBL612844 |
| Epidermophyton floccosum | 0.1392     | CHEMBL612386 |
| Microsporum              | 0.0682     | CHEMBL612278 |

**Figure S128.** 4'-Hydroxymethylflavone (**5a**) antifungal activity prediction using the Way2Drug AntiFun-Pred modelling

| Virus                                                                         | Protein target                                | Confidence |
|-------------------------------------------------------------------------------|-----------------------------------------------|------------|
| Human immunodeficiency virus 2                                                | Human immunodeficiency virus type 2 integrase | 0.7413     |
| Severe acute respiratory syndrome coronavirus 2                               | Replicase polyprotein 1ab                     | 0.5088     |
| Dengue virus type 2                                                           | Genome polyprotein                            | 0.4718     |
| Vaccinia virus (strain Western Reserve) (VACV)<br>(Vaccinia virus (strainWR)) | DNA polymerase                                | 0.2440     |
| Varicella-zoster virus (strain Dumas) (HHV-3)<br>(Human herpesvirus 3)        | DNA polymerase                                | 0.2199     |
| Herpes simplex virus (type 1 / strain 17)                                     | Human herpesvirus 1 DNA polymerase            | 0.2199     |
| SARS coronavirus                                                              | Replicase polyprotein 1ab                     | 0.1268     |
| SARS coronavirus                                                              | SARS coronavirus 3C-like proteinase           | 0.0858     |
| Macacine herpesvirus 1                                                        | Thymidine kinase                              | 0.0623     |

**Figure S129.** 4'-Hydroxymethylflavone (**5a**) antiviral activity prediction using the Way2Drug AntiVir-Pred modelling

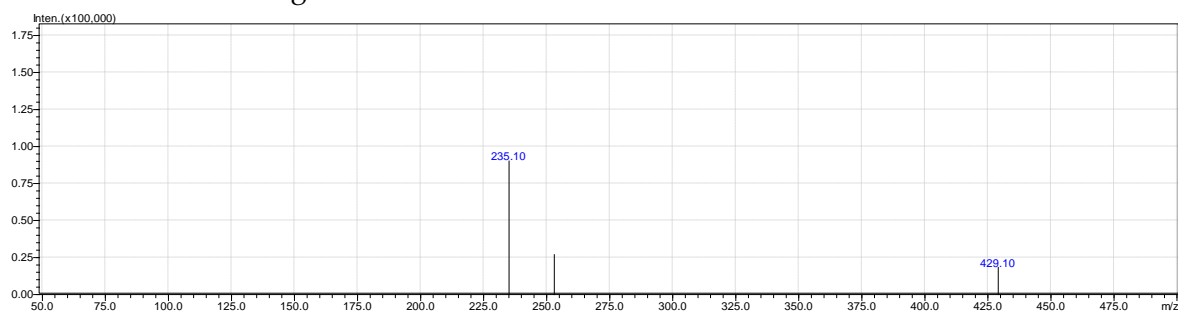

**Figure S130.** MS analysis flavone 4'-methylene-O- $\beta$ -D-(4''-O-methyl)-glucopyranoside (**5b**)

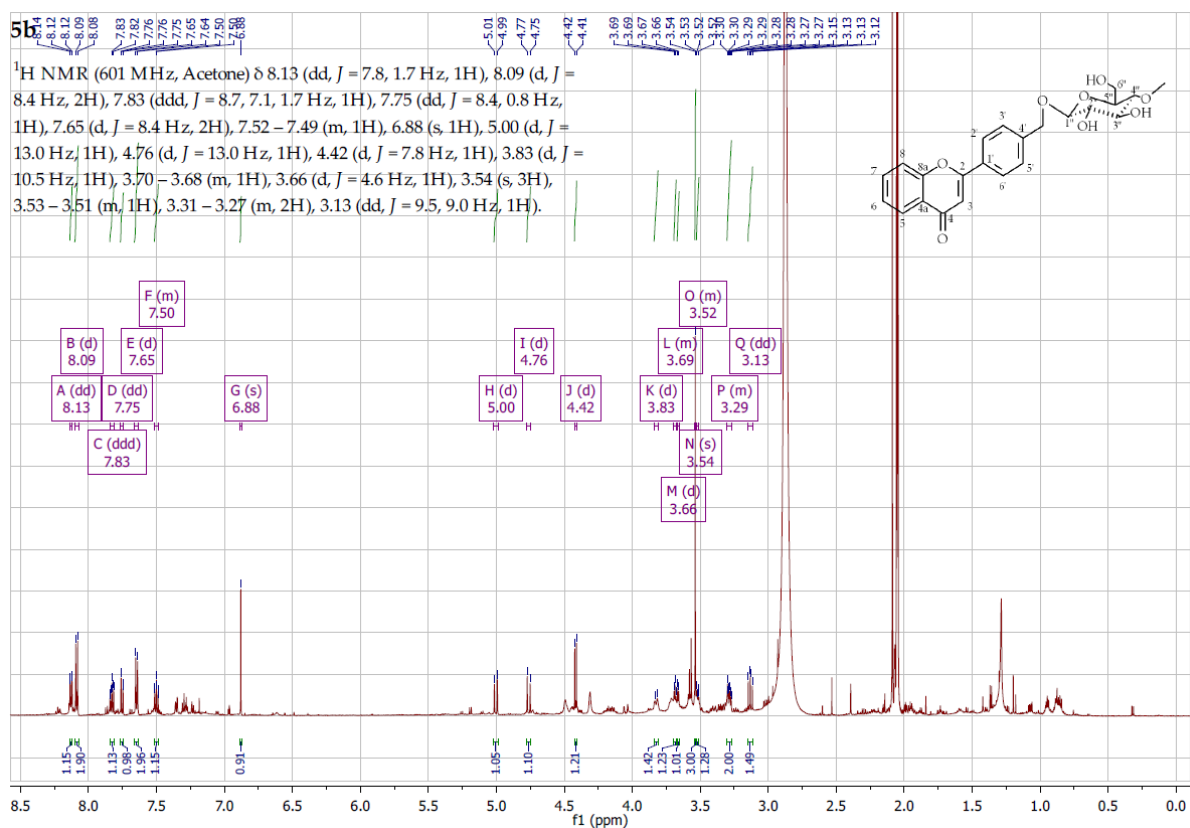

**Figure S131.** <sup>1</sup>H NMR spectrum (δ, acetone-d<sub>6</sub>, 600 MHz) of flavone 4'-methylene-*O*-β-D-(4''-*O*-methyl)-glucopyranoside (**5b**)

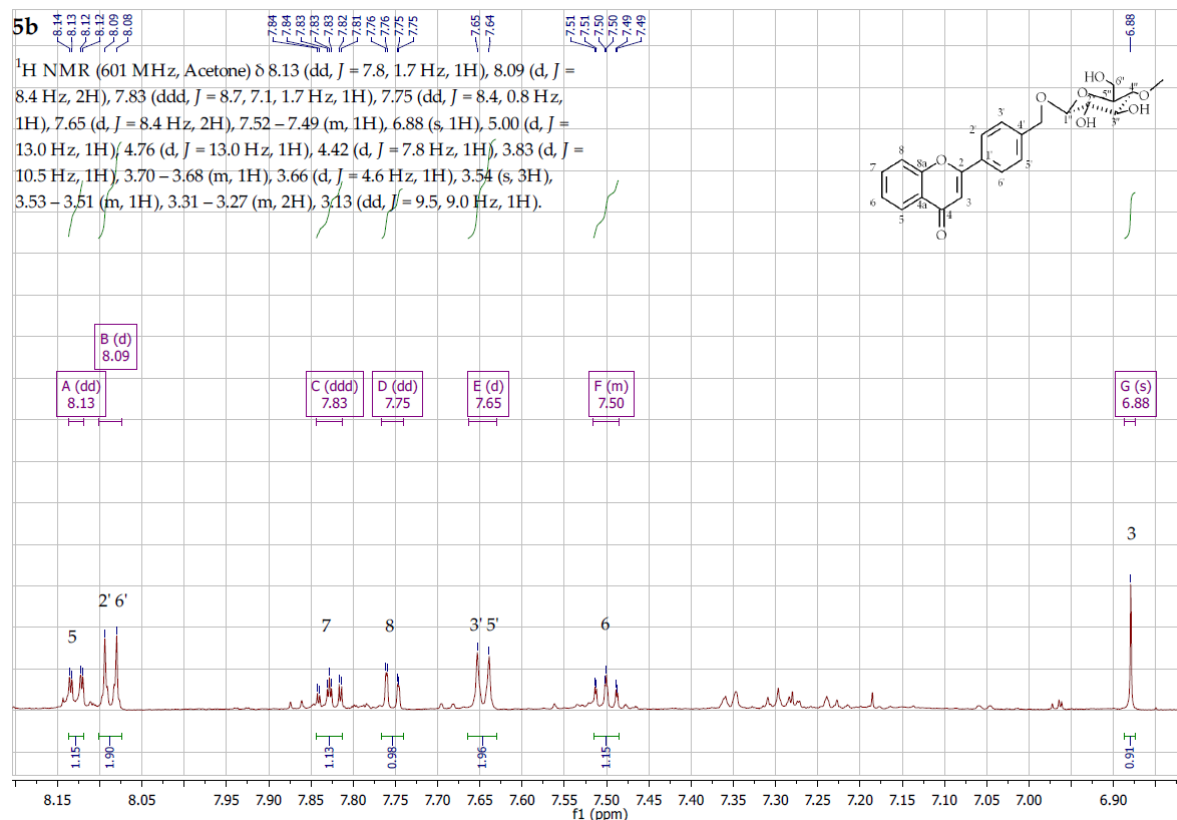

**Figure S132.** <sup>1</sup>H NMR spectrum expansion (δ, acetone-d<sub>6</sub>, 600 MHz) of flavone 4'-methylene-*O*-β-D-(4''-*O*-methyl)-glucopyranoside (**5b**)

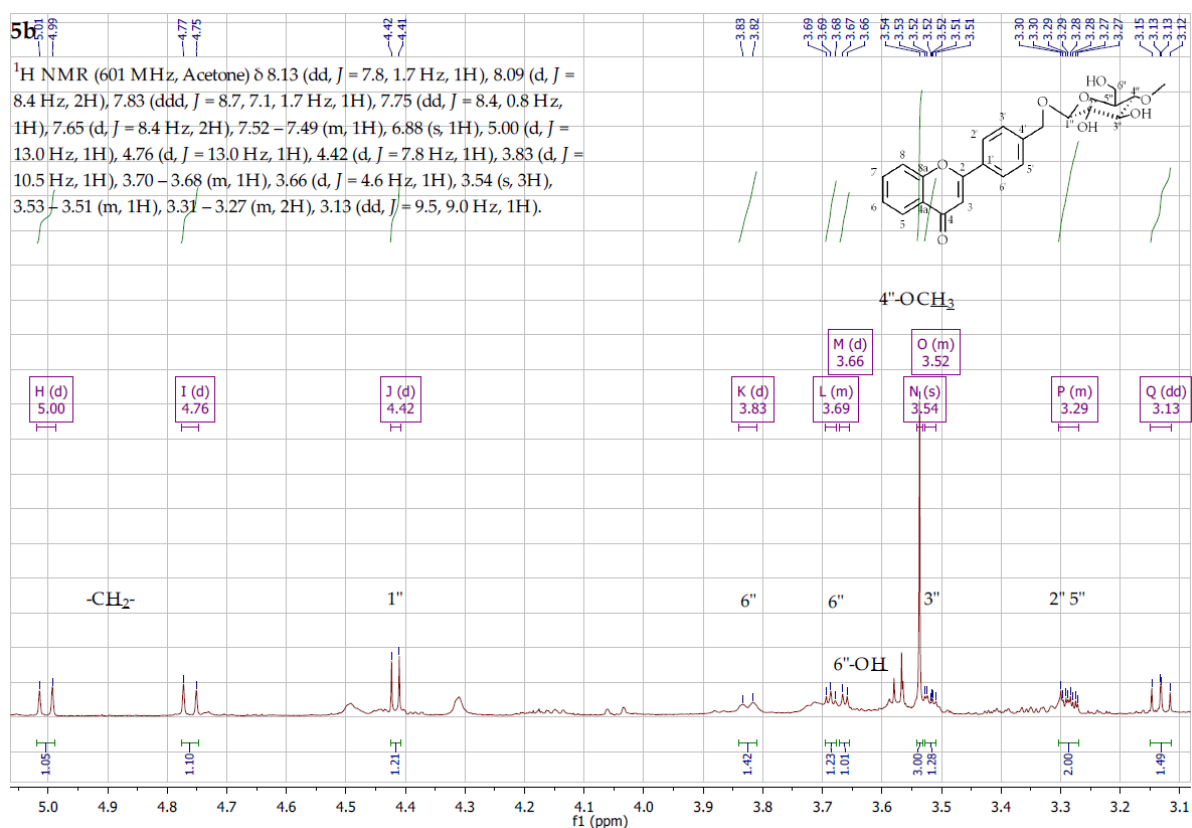

**Figure S133.** <sup>1</sup>H NMR spectrum expansion (δ, acetone-d<sub>6</sub>, 600 MHz) of flavone 4'-methylene-*O*-β-D-(4''-*O*-methyl)-glucopyranoside (**5b**)

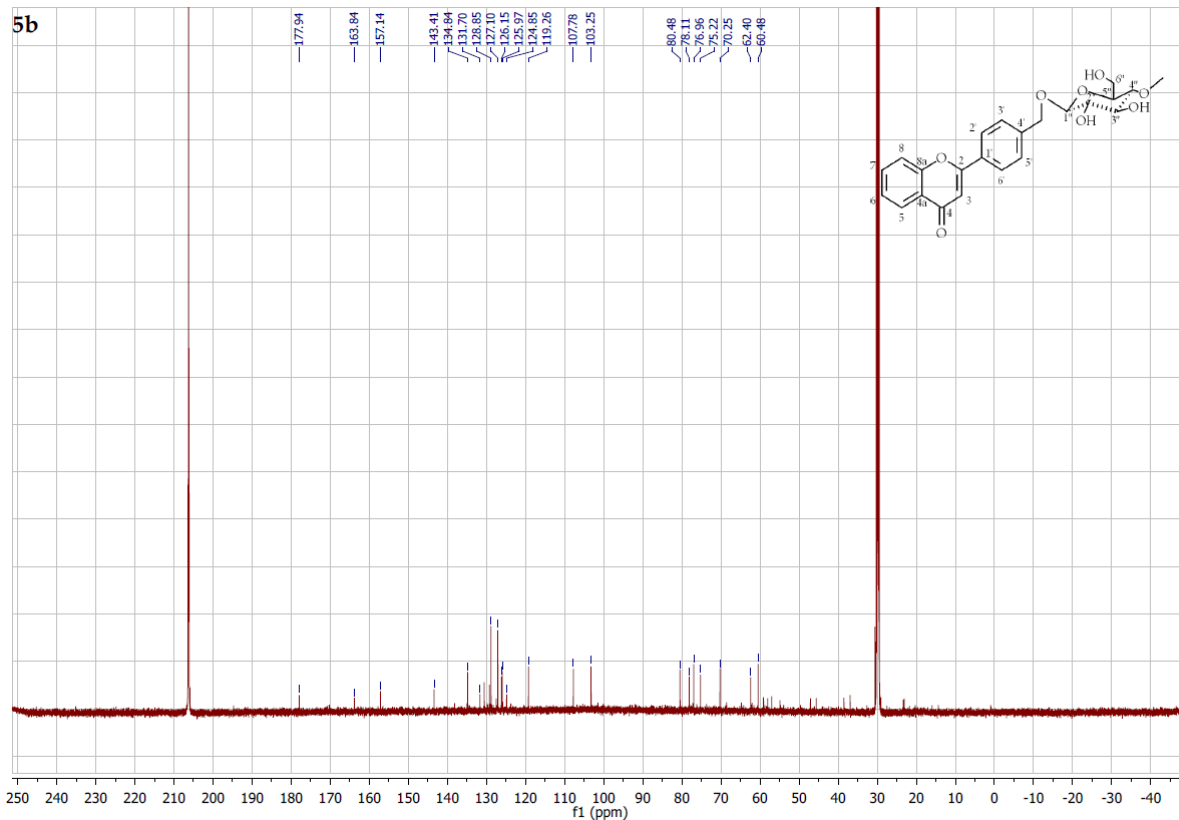

**Figure S134.** <sup>13</sup>C NMR spectrum expansion (δ, acetone-d<sub>6</sub>, 151 MHz) of flavone 4'-methylene-*O*-β-D-(4''-*O*-methyl)-glucopyranoside (**5b**)

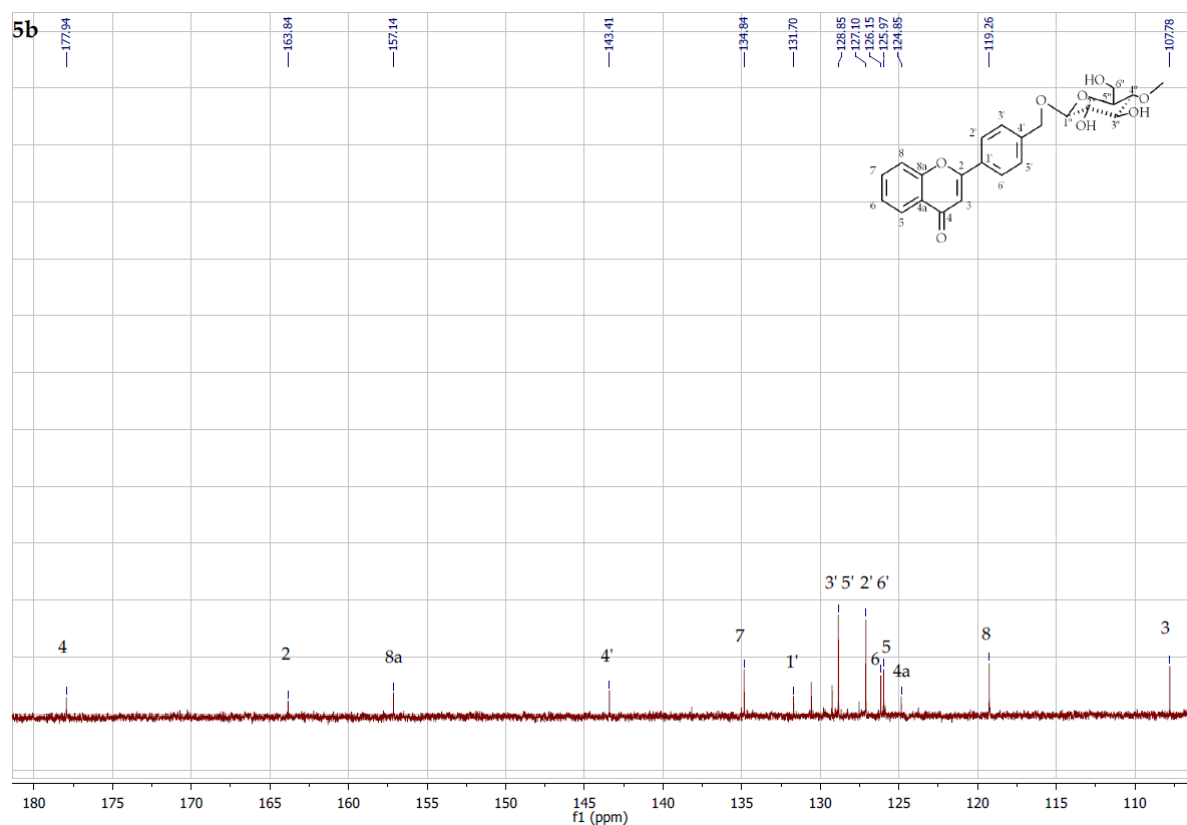

**Figure S135.**  $^{13}\text{C}$  NMR spectrum expansion ( $\delta$ , acetone- $d_6$ , 151 MHz) of flavone 4'-methylene-*O*- $\beta$ -D-(4''-*O*-methyl)-glucopyranoside (**5b**)

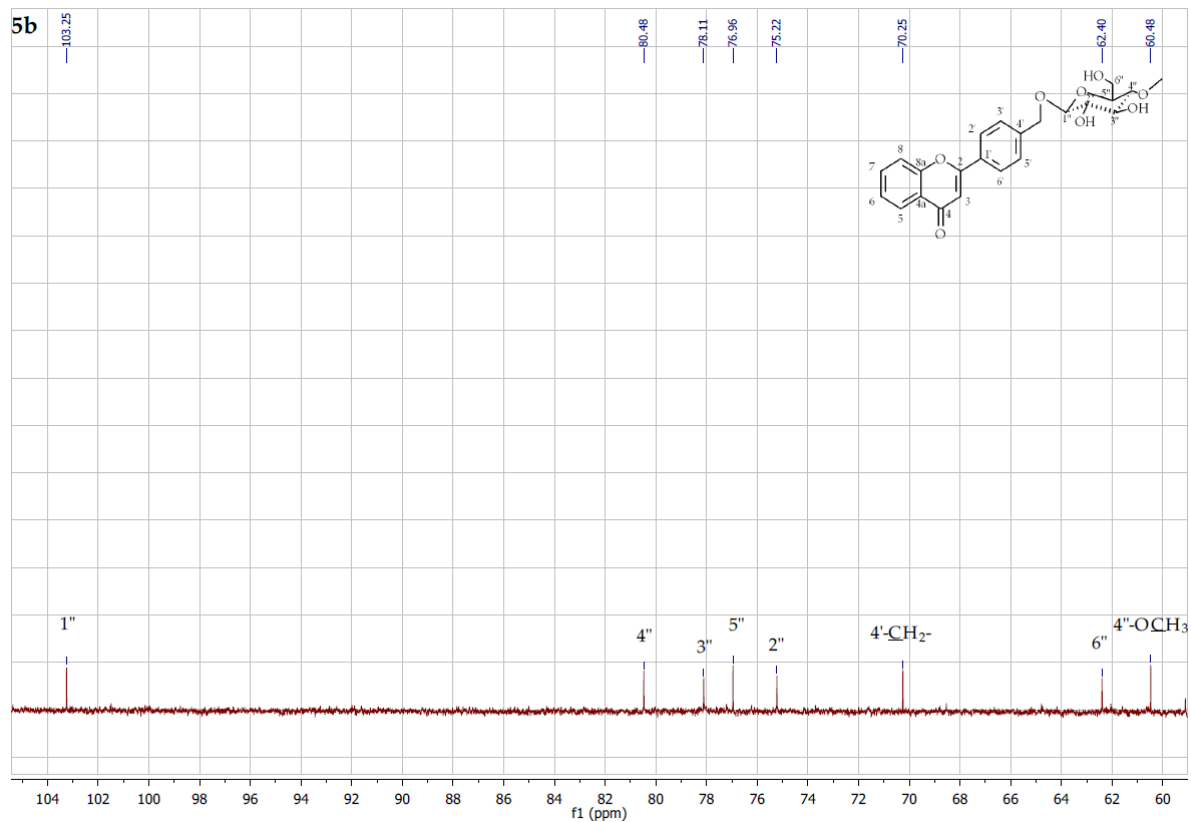

**Figure S136.**  $^{13}\text{C}$  NMR spectrum expansion ( $\delta$ , acetone- $d_6$ , 151 MHz) of flavone 4'-methylene-*O*- $\beta$ -D-(4''-*O*-methyl)-glucopyranoside (**5b**)

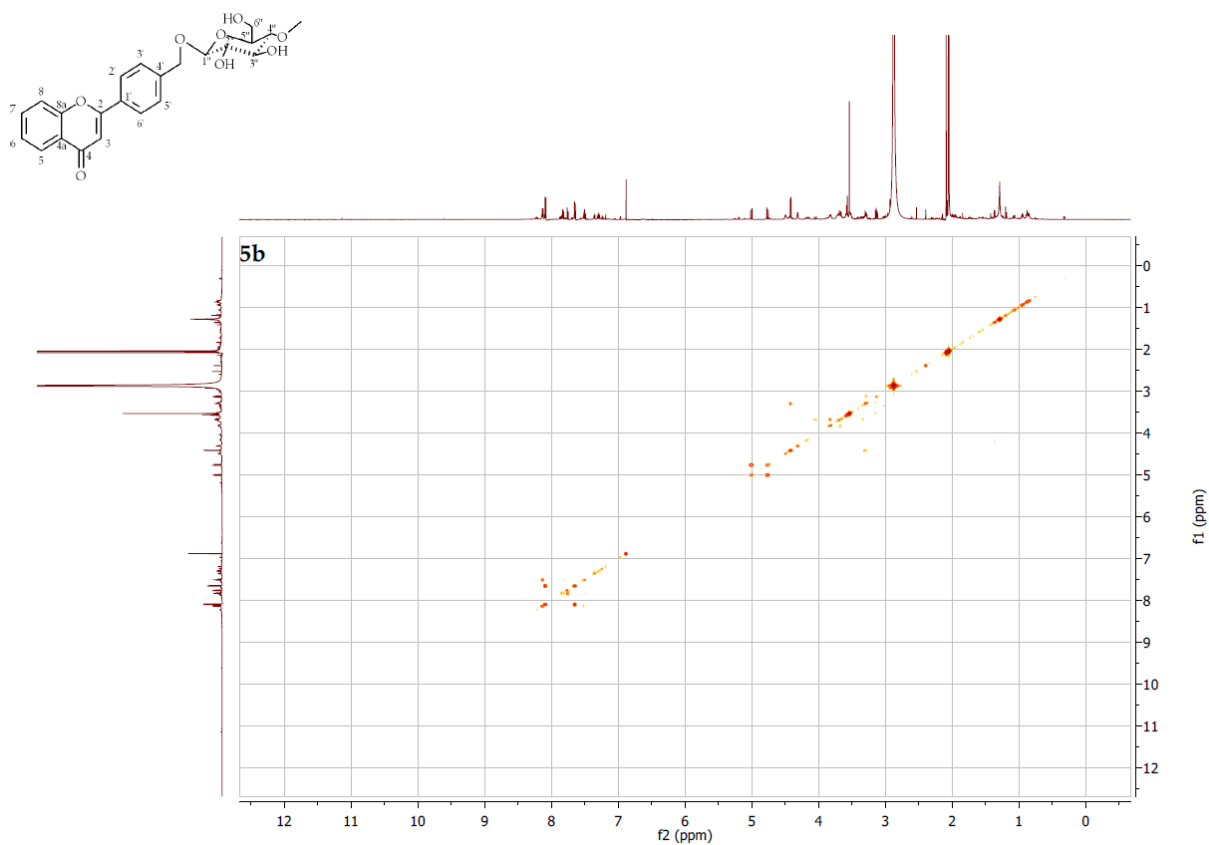

**Figure S137.** COSY contour map –  $^1\text{H} \times ^1\text{H}$  of flavone 4'-methylene- $O$ - $\beta$ -D-(4''- $O$ -methyl)-glucopyranoside (**5b**)

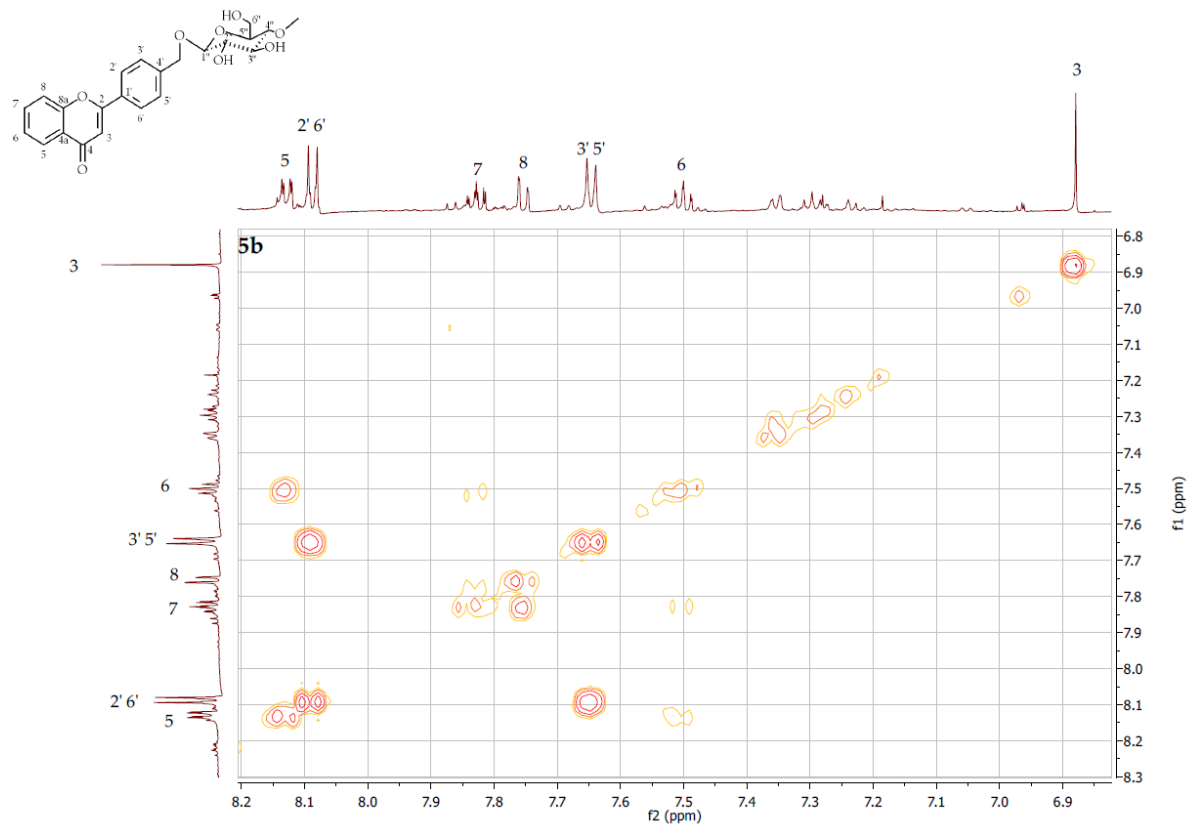

**Figure S138.** COSY contour map –  $^1\text{H} \times ^1\text{H}$  expansion of flavone 4'-methylene- $O$ - $\beta$ -D-(4''- $O$ -methyl)-glucopyranoside (**5b**)



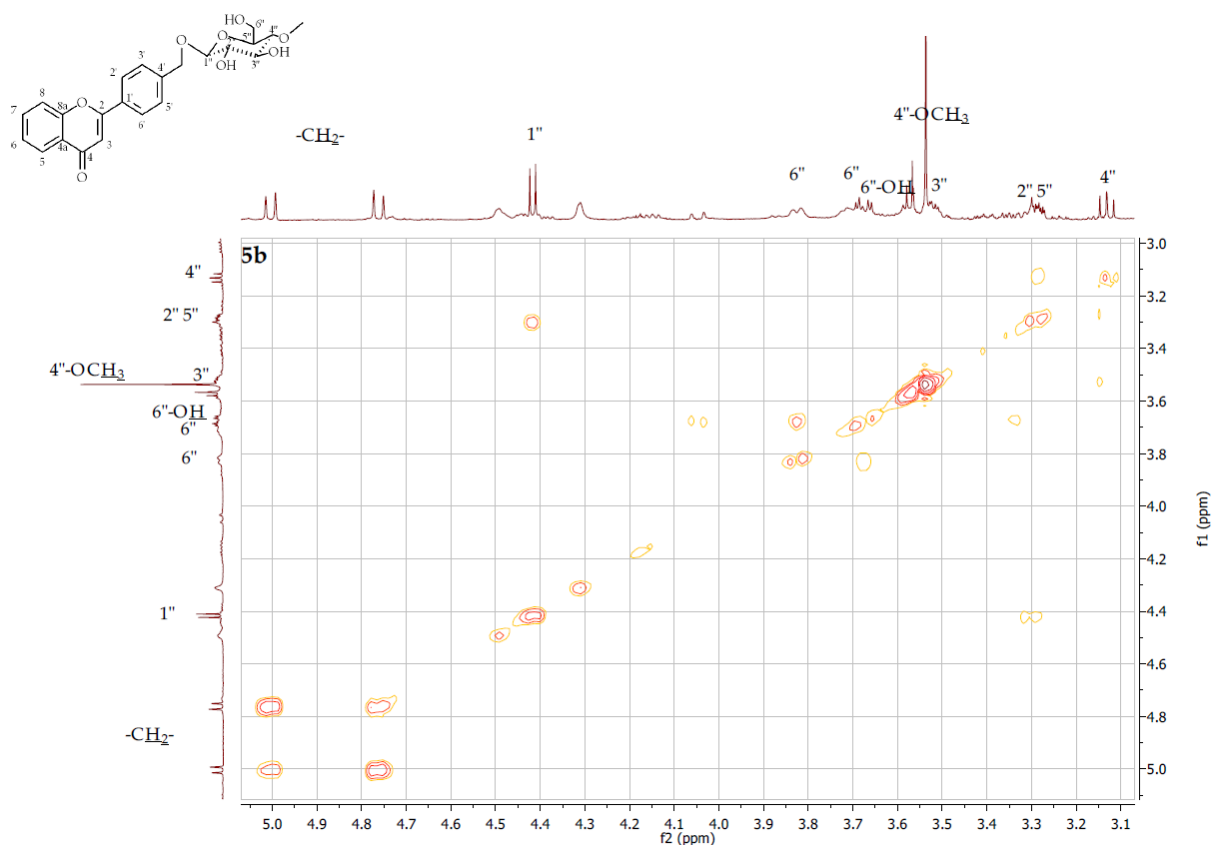

**Figure S139.** COSY contour map –  $^1\text{H} \times ^1\text{H}$  expansion of flavone 4'-methylen-O- $\beta$ -D-(4''-O-methyl)-glucopyranoside (**5b**)

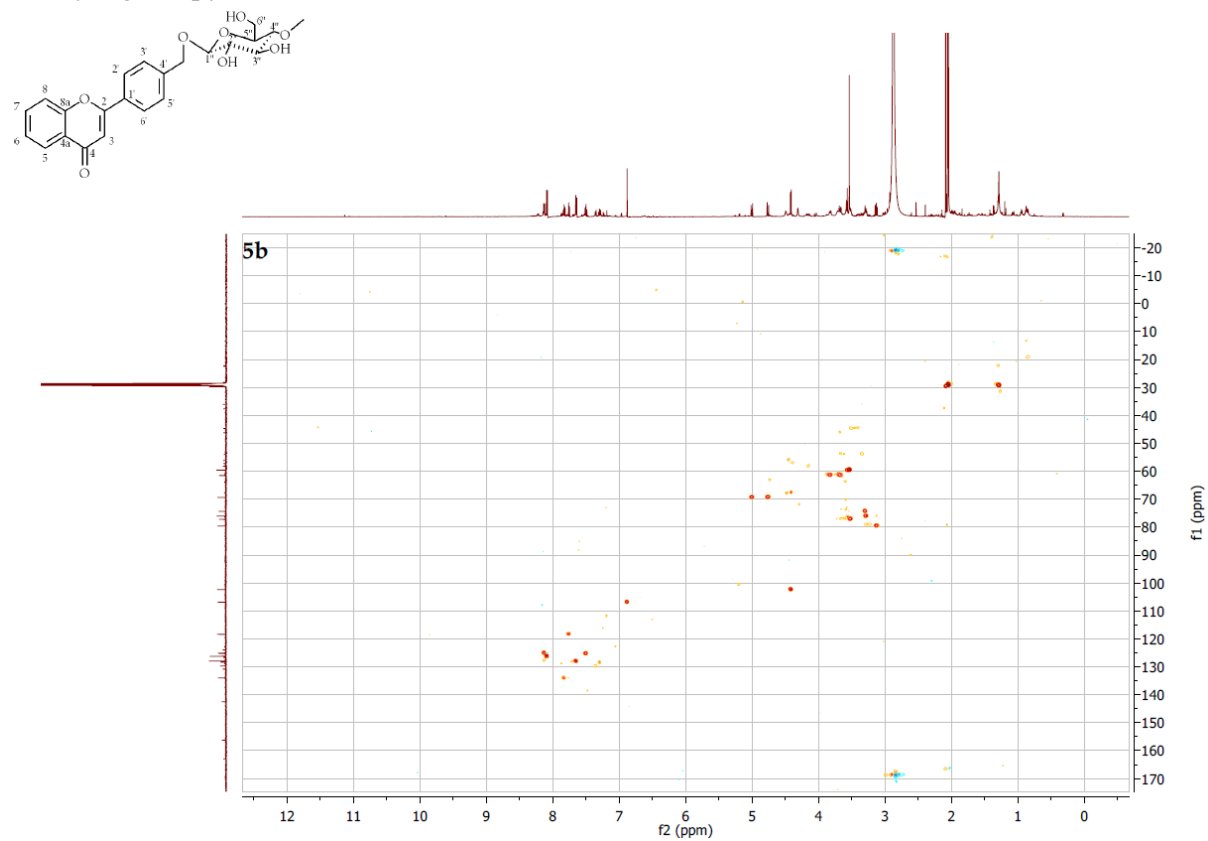

**Figure S140.** HSQC contour map –  $^1\text{H} \times ^{13}\text{C}$  of flavone 4'-methylen-O- $\beta$ -D-(4''-O-methyl)-glucopyranoside (**5b**)

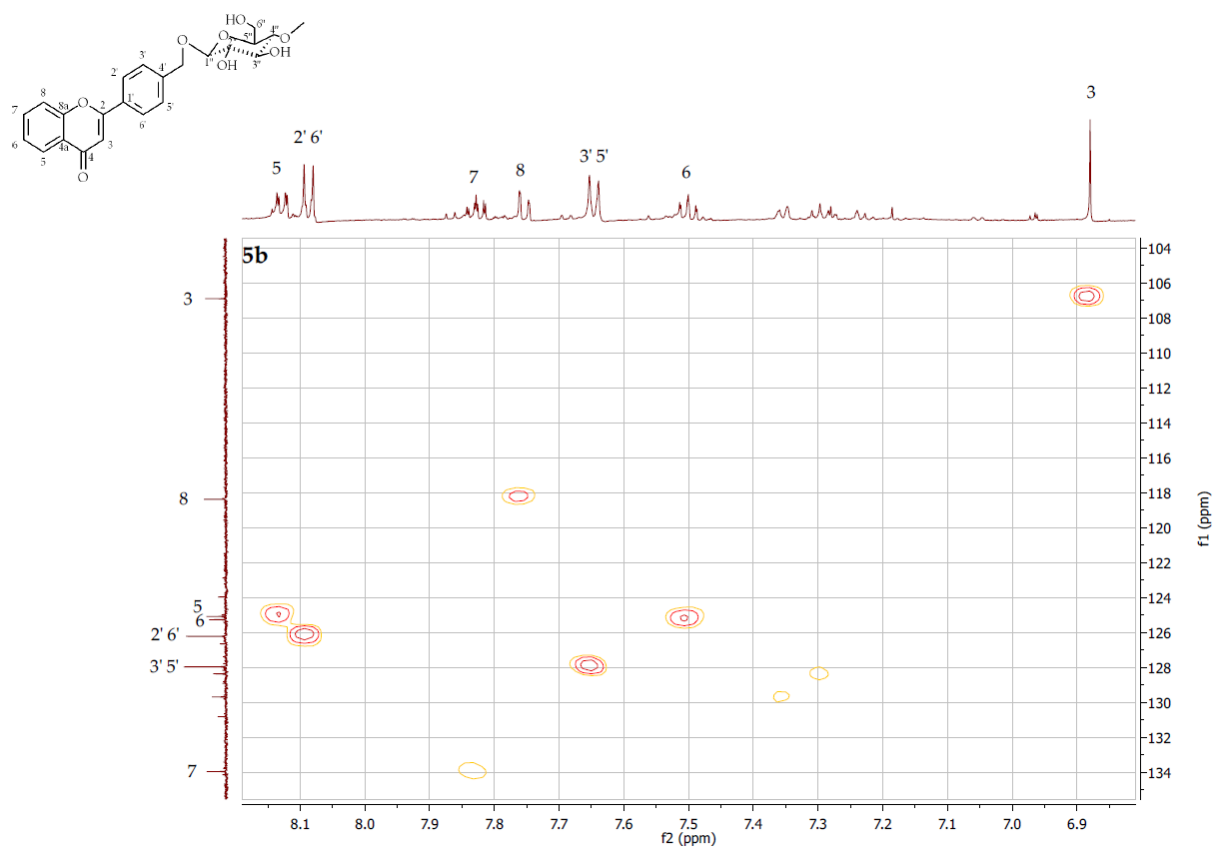

**Figure S141.** HSQC contour map –  $^1\text{H} \times ^{13}\text{C}$  expansion of flavone 4'-methylene-O- $\beta$ -D-(4''-O-methyl)-glucopyranoside (**5b**)

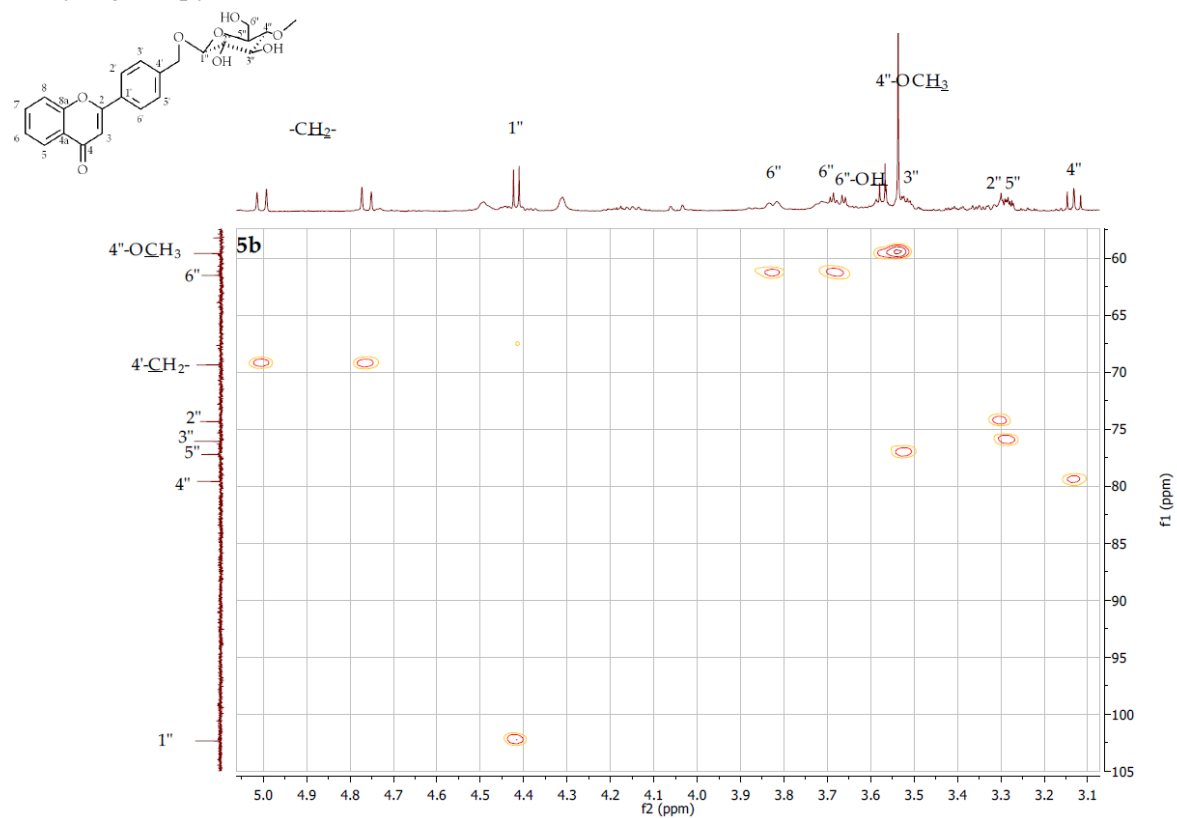

**Figure S142.** HSQC contour map –  $^1\text{H} \times ^{13}\text{C}$  expansion of flavone 4'-methylene-O- $\beta$ -D-(4''-O-methyl)-glucopyranoside (**5b**)

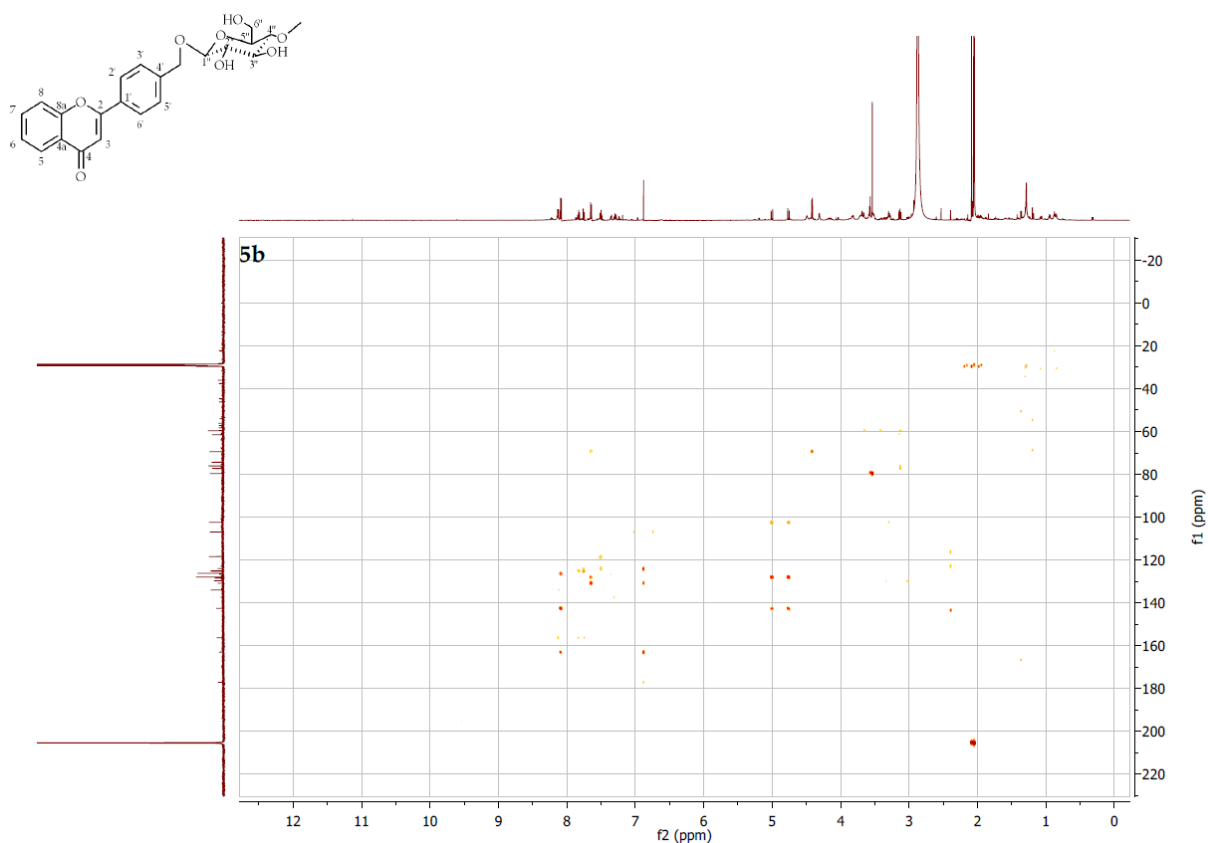

**Figure S143.** HMBC contour map –  $^1\text{H} \times ^{13}\text{C}$  of flavone 4'-methylene-O- $\beta$ -D-(4''-O-methyl)-glucopyranoside (**5b**)

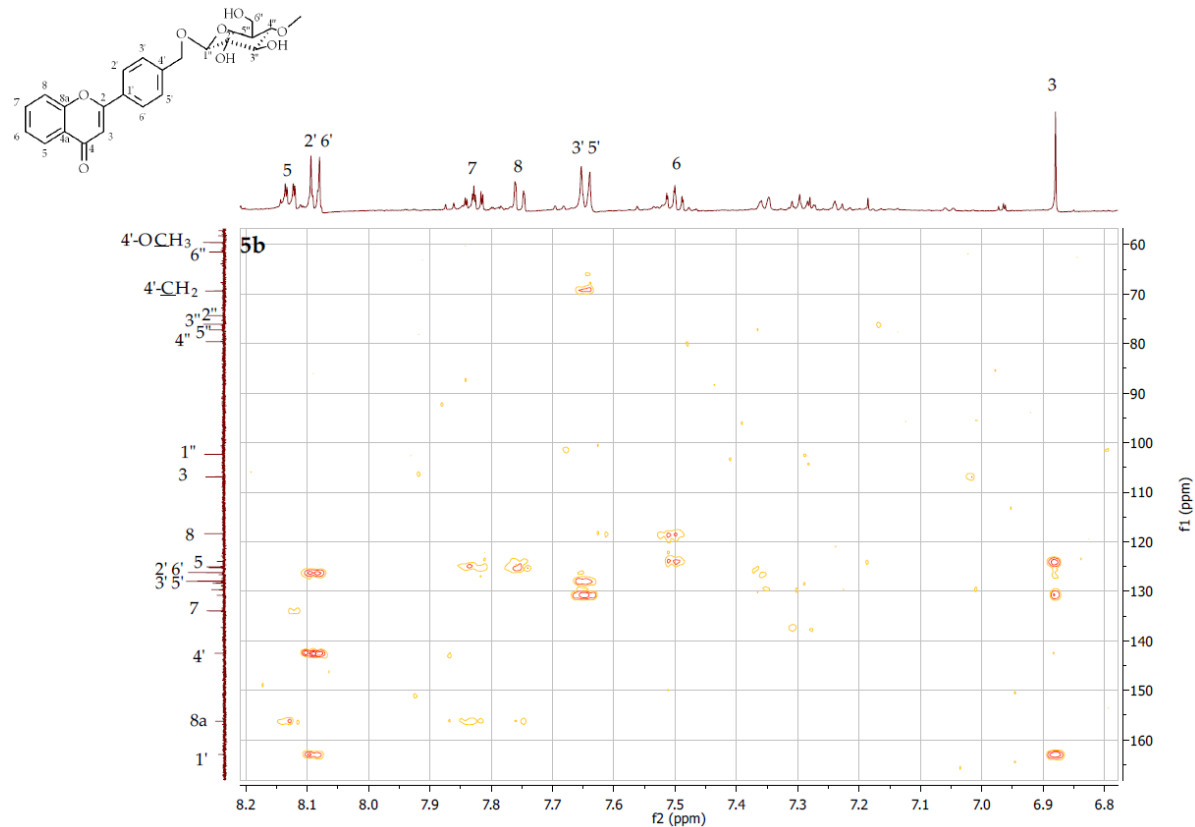

**Figure S144.** HMBC contour map –  $^1\text{H} \times ^{13}\text{C}$  expansion of flavone 4'-methylene-O- $\beta$ -D-(4''-O-methyl)-glucopyranoside (**5b**)

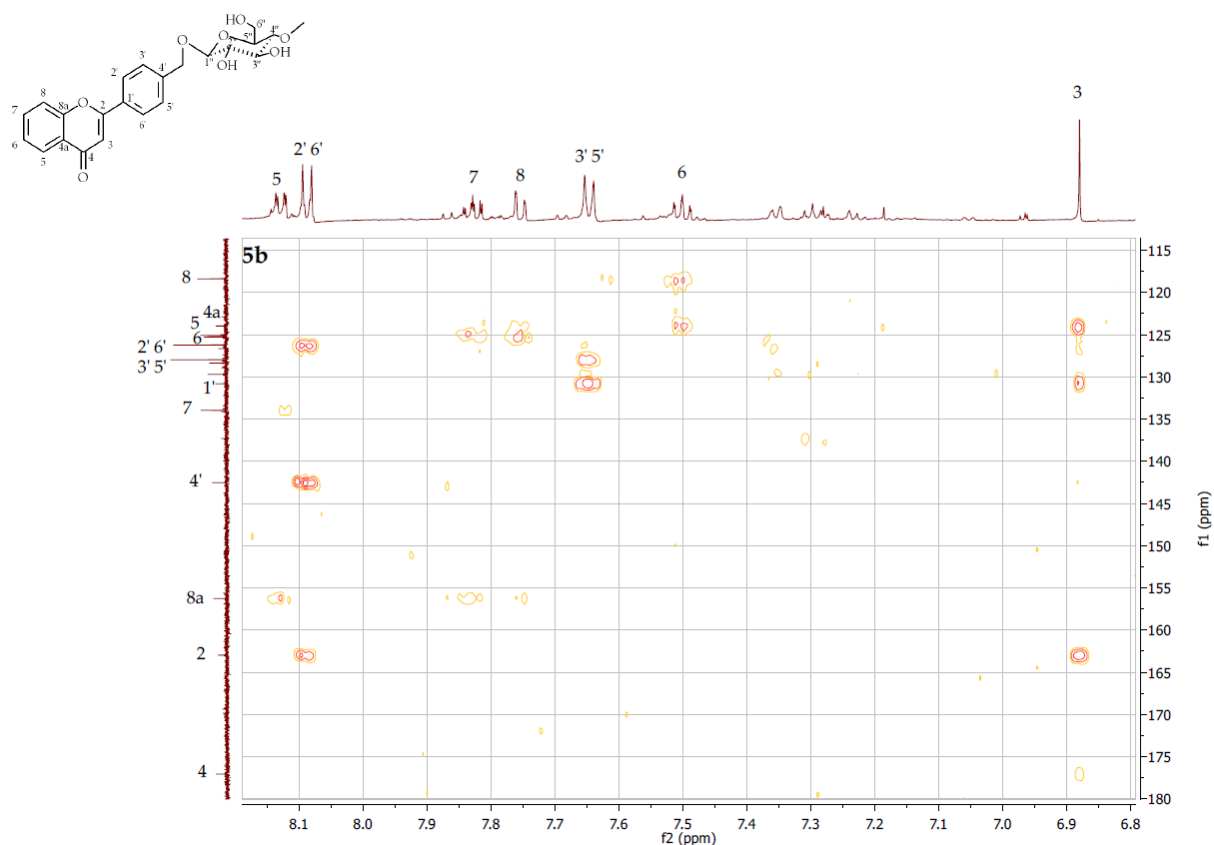

**Figure S145.** HMBC contour map –  $^1\text{H} \times ^{13}\text{C}$  expansion of flavone 4'-methylene- $O$ - $\beta$ -D-(4''- $O$ -methyl)-glucopyranoside (**5b**)

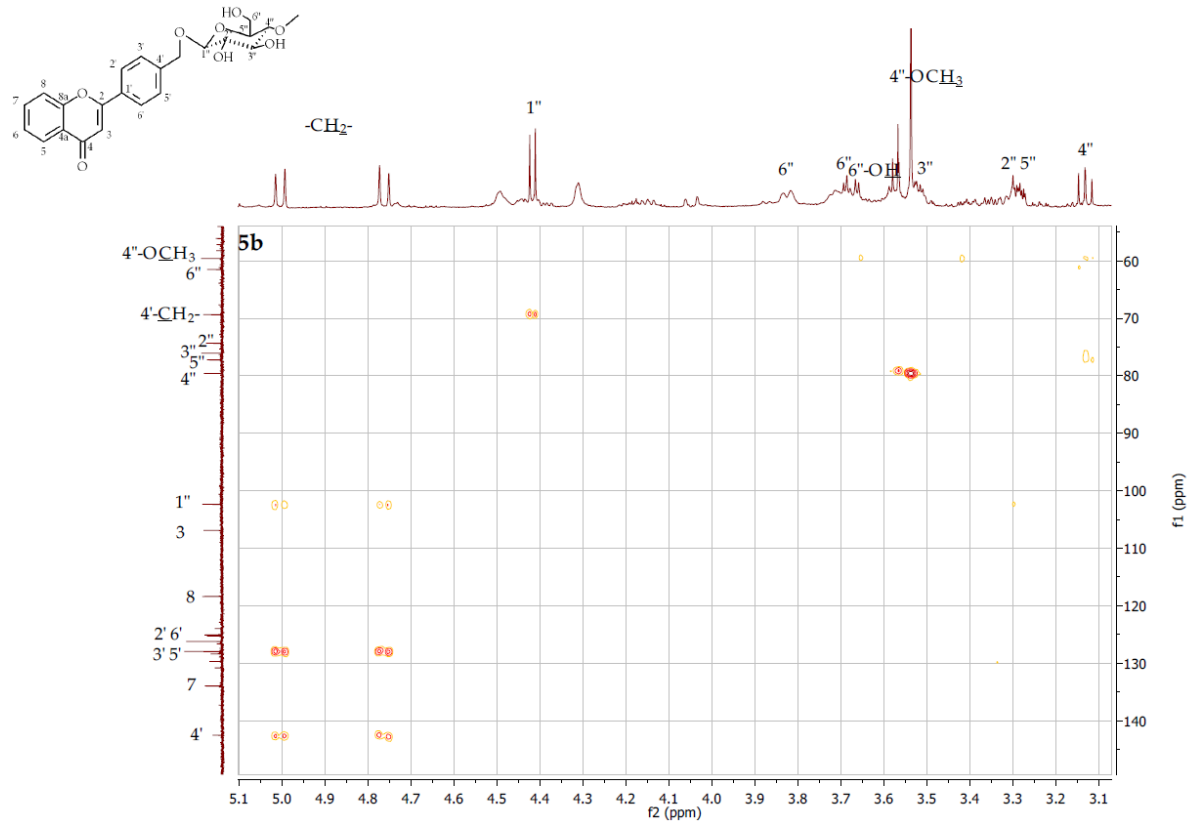

**Figure S146.** HMBC contour map –  $^1\text{H} \times ^{13}\text{C}$  expansion of flavone 4'-methylene- $O$ - $\beta$ -D-(4''- $O$ -methyl)-glucopyranoside (**5b**)

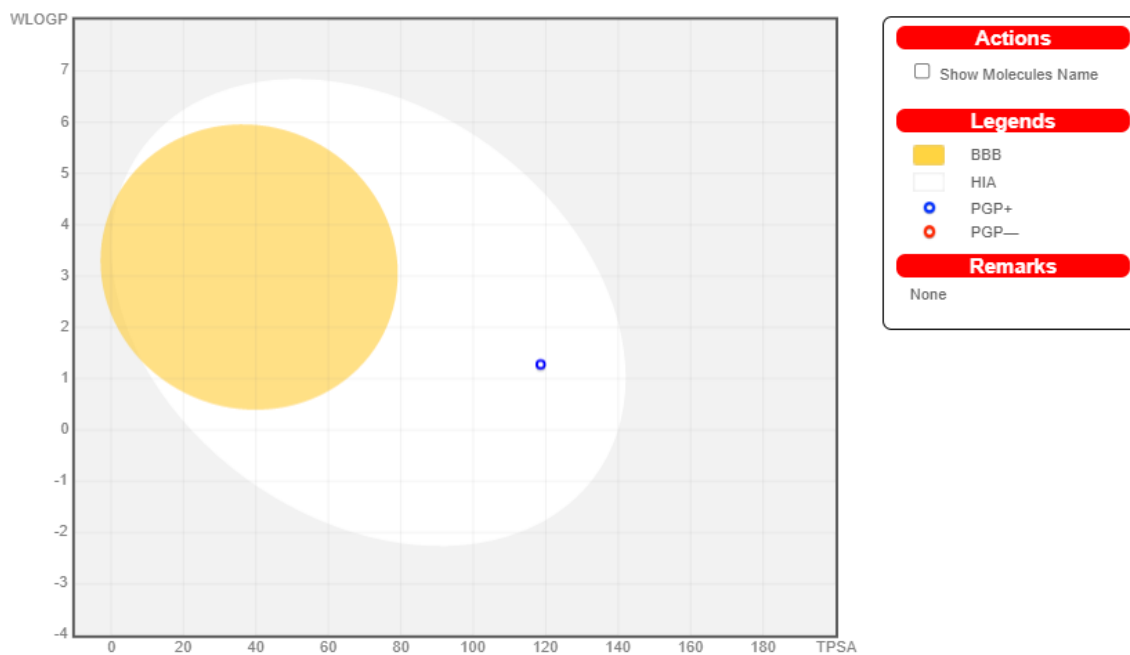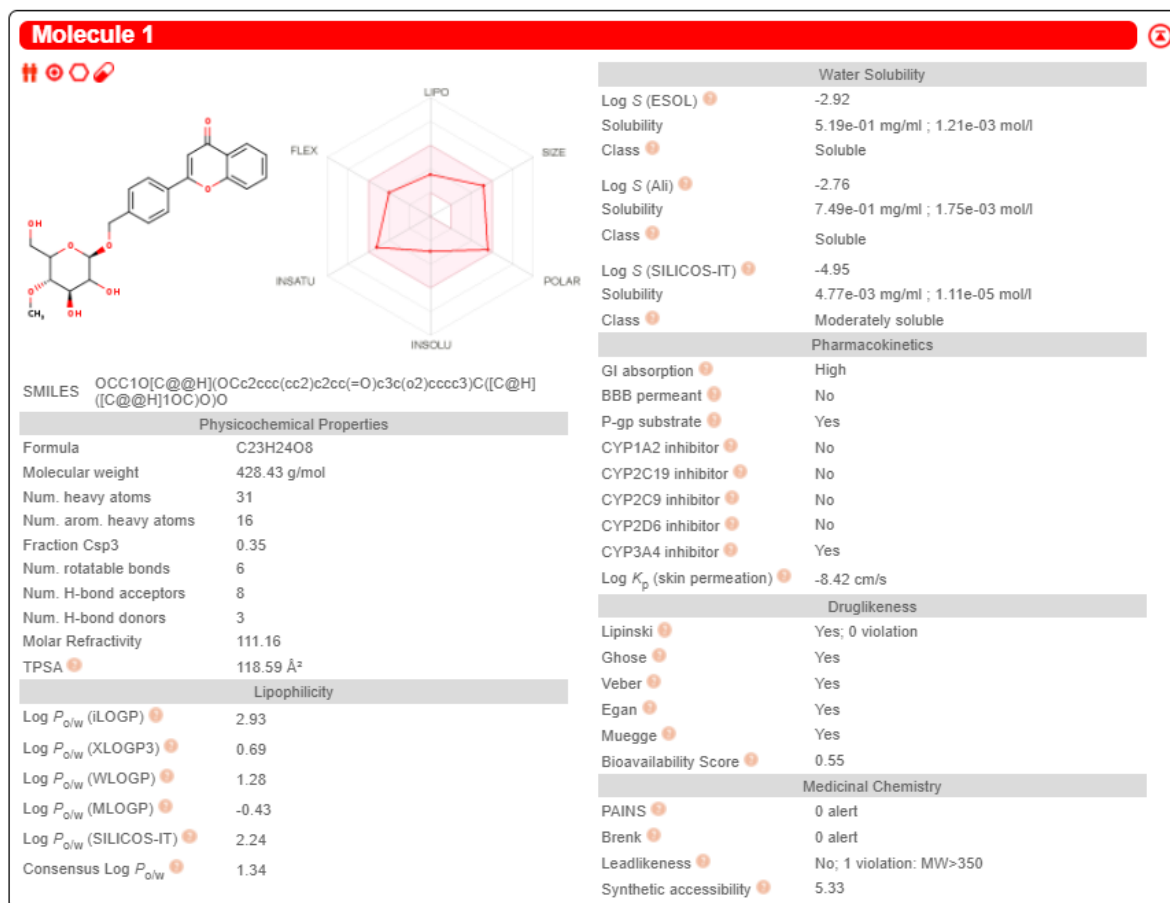

**Figure S147.** Flavone 4'-methylene-O- $\beta$ -D-(4''-O-methyl)-glucopyranoside (**5b**) physicochemical and ADME parameters prediction using the SwissADME modelling

| Pa    | Pi    | Activity                                         |
|-------|-------|--------------------------------------------------|
| 0,957 | 0,002 | Membrane permeability inhibitor                  |
| 0,942 | 0,002 | Vasoprotector                                    |
| 0,920 | 0,007 | Membrane integrity agonist                       |
| 0,913 | 0,008 | CDP-glycerol glycerophosphotransferase inhibitor |
| 0,899 | 0,005 | Benzoate-CoA ligase inhibitor                    |
| 0,894 | 0,004 | Anaphylatoxin receptor antagonist                |
| 0,892 | 0,003 | Hepatoprotectant                                 |
| 0,878 | 0,008 | Alkenylglycerophosphocholine hydrolase inhibitor |
| 0,871 | 0,003 | Cardioprotectant                                 |
| 0,863 | 0,008 | Sugar-phosphatase inhibitor                      |

**Figure S148.** Flavone 4'-methylene-*O*- $\beta$ -D-(4''-*O*-methyl)-glucopyranoside (**5b**) biological activity prediction using the Way2Drug Pass online modelling

| Name                                                 | Confidence | ChEMBL ID     |
|------------------------------------------------------|------------|---------------|
| Clostridium ramosum                                  | 0.6319     | CHEMBL614971  |
| RESISTANT Acinetobacter pittii                       | 0.5844     | CHEMBL3140321 |
| Actinomyces meyeri                                   | 0.5835     | CHEMBL612289  |
| Mycobacterium mageritense                            | 0.5678     | CHEMBL612959  |
| RESISTANT Mycobacterium ulcerans                     | 0.5614     | CHEMBL612965  |
| Clostridium cadaveris                                | 0.5549     | CHEMBL614970  |
| Yersinia pestis                                      | 0.4399     | CHEMBL614597  |
| Nocardia transvalensis                               | 0.4242     | CHEMBL613234  |
| Lactobacillus plantarum                              | 0.4199     | CHEMBL614973  |
| Staphylococcus lugdunensis                           | 0.4047     | CHEMBL613303  |
| Pseudomonas fluorescens                              | 0.4042     | CHEMBL612500  |
| Clostridium sordellii                                | 0.3944     | CHEMBL613072  |
| Streptococcus oralis                                 | 0.3940     | CHEMBL613305  |
| RESISTANT Staphylococcus aureus subsp. aureus RN4220 | 0.3887     | CHEMBL2366906 |
| Fusobacterium sp.                                    | 0.3442     | CHEMBL612690  |

**Figure S149.** Flavone 4'-methylene-*O*- $\beta$ -D-(4''-*O*-methyl)-glucopyranoside (**5b**) antibacterial activity prediction using the Way2Drug AntiBac-Pred modelling

| Name                        | Confidence | ChEMBL ID    |
|-----------------------------|------------|--------------|
| Rhizopus oryzae             | 0.3257     | CHEMBL612306 |
| Absidia corymbifera         | 0.3067     | CHEMBL612369 |
| Trichophyton mentagrophytes | 0.1971     | CHEMBL613162 |
| Aspergillus niger           | 0.1703     | CHEMBL358    |
| Saccharomyces cerevisiae    | 0.1416     | CHEMBL361    |
| Mucor                       | 0.0665     | CHEMBL612521 |
| Penicillium marneffei       | 0.0131     | CHEMBL612994 |
| Epidermophyton floccosum    | 0.0073     | CHEMBL612386 |

**Figure S150.** Flavone 4'-methylene-*O*- $\beta$ -D-(4''-*O*-methyl)-glucopyranoside (**5b**) antifungal activity prediction using the Way2Drug AntiFun-Pred modelling

| Virus                                                                        | Protein target                                | Confidence |
|------------------------------------------------------------------------------|-----------------------------------------------|------------|
| Severe acute respiratory syndrome coronavirus 2                              | Replicase polyprotein 1ab                     | 0.7858     |
| Human immunodeficiency virus 2                                               | Human immunodeficiency virus type 2 integrase | 0.4219     |
| Varicella-zoster virus<br>(strain Dumas)<br>(HHV-3)<br>(Human herpesvirus 3) | Thymidine kinase                              | 0.0180     |

**Figure S151.** Flavone 4'-methylene-*O*- $\beta$ -D-(4''-*O*-methyl)-glucopyranoside (**5b**) antiviral activity prediction using the Way2Drug AntiVir-Pred modelling

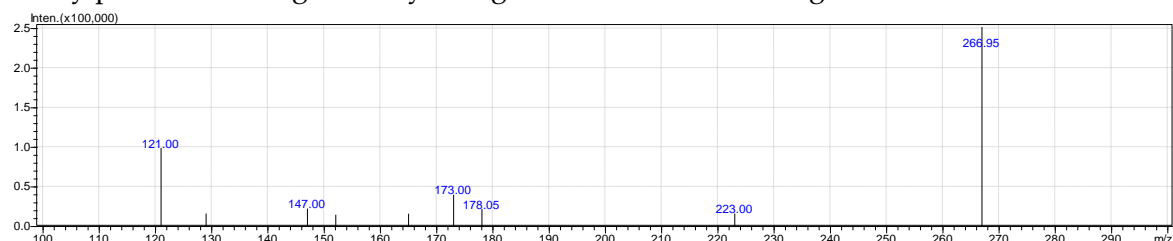

**Figure S152.** MS analysis flavone 4'-carboxylic acid (**5c**)

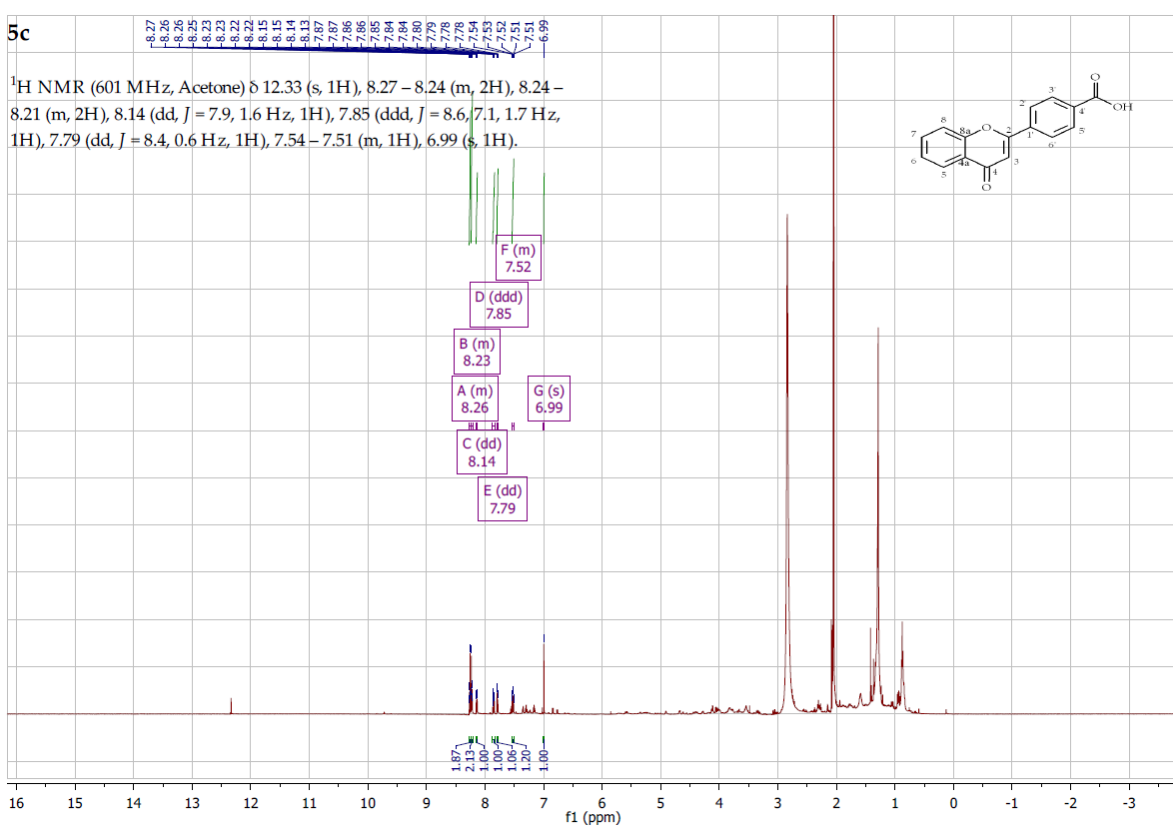

**Figure S153.**  $^1\text{H}$  NMR spectrum ( $\delta$ , acetone- $d_6$ , 600 MHz) of flavone 4'-carboxylic acid (**5c**)

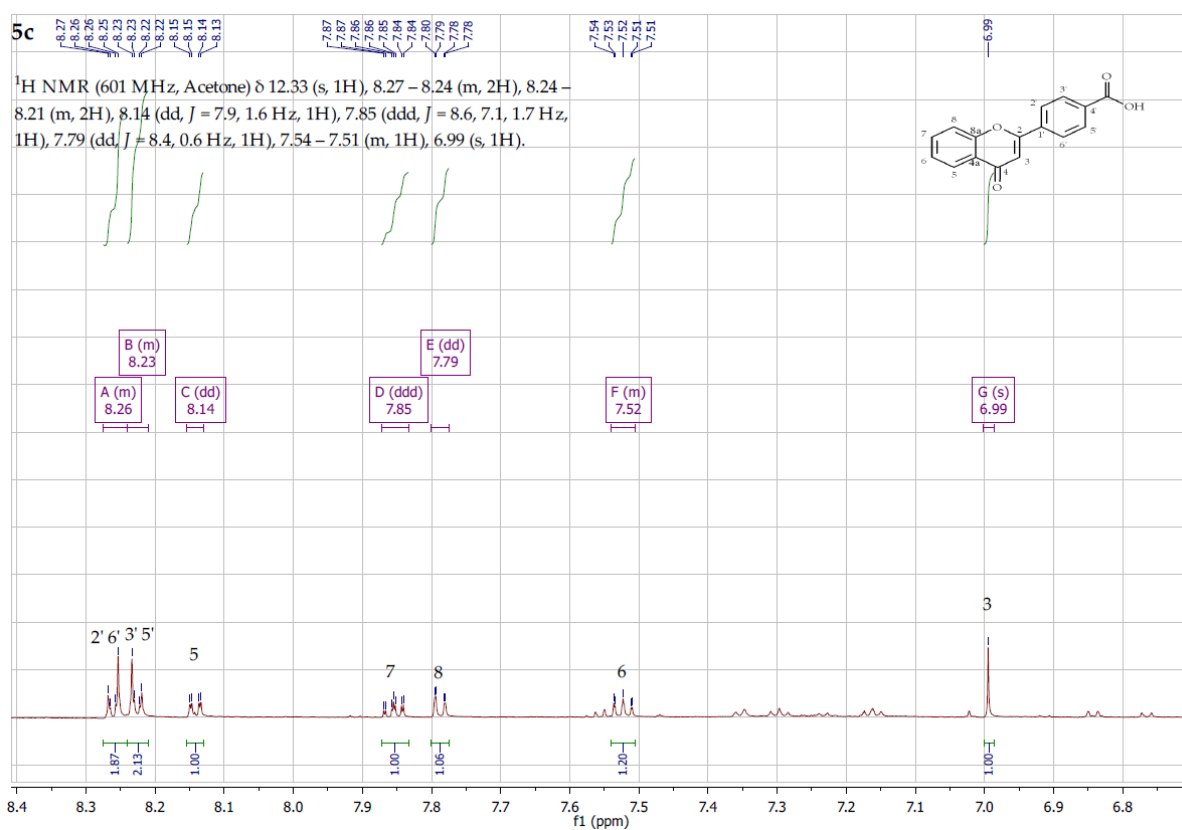

**Figure S154.** <sup>1</sup>H NMR spectrum expansion (δ, acetone-d<sub>6</sub>, 600 MHz) of flavone 4'-carboxylic acid (5c)

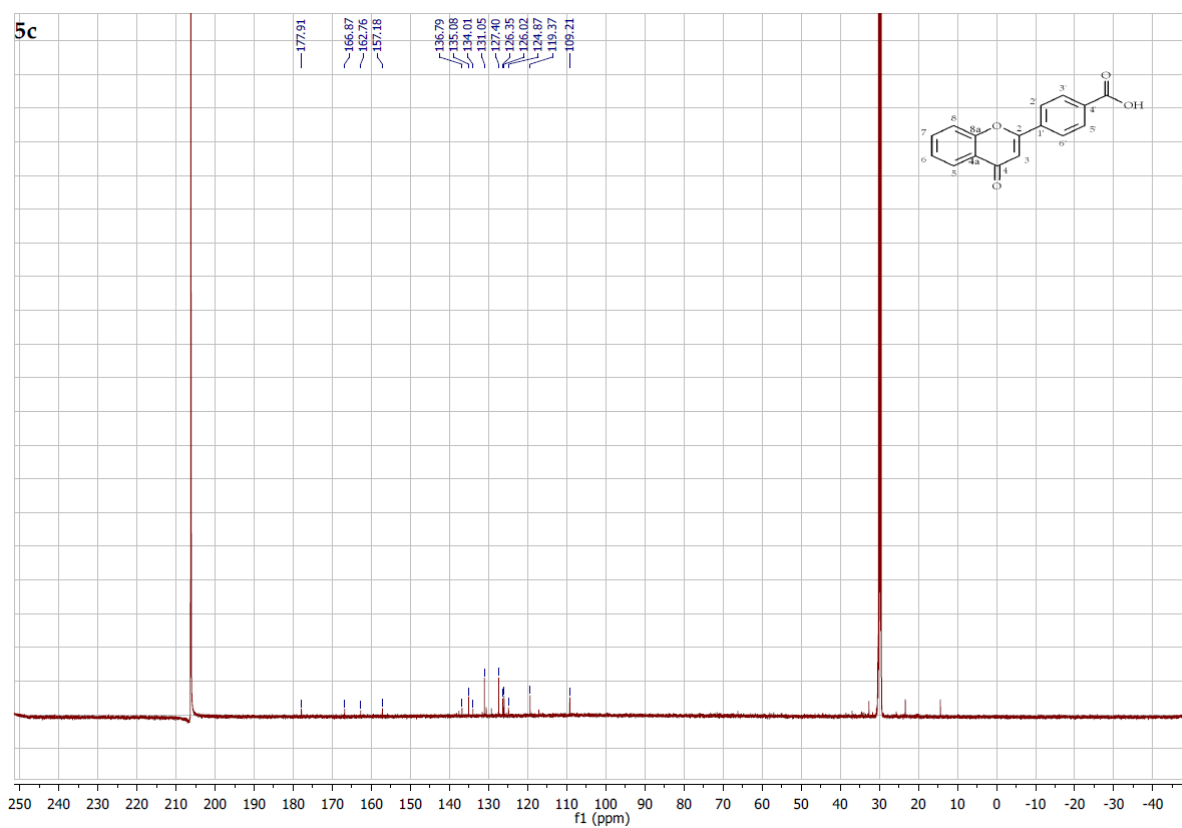

**Figure S155.** <sup>13</sup>C NMR spectrum expansion (δ, acetone-d<sub>6</sub>, 151 MHz) of flavone 4'-carboxylic acid (5c)



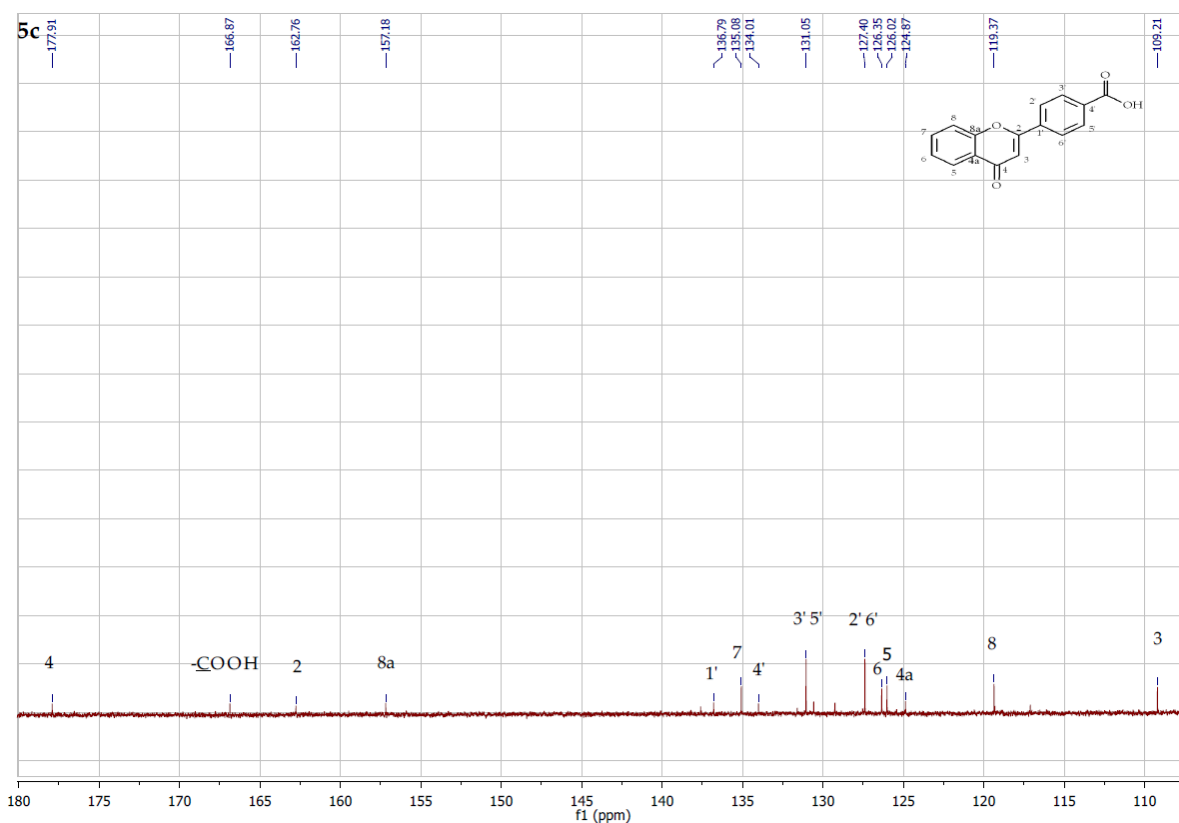

**Figure S156.**  $^{13}\text{C}$  NMR spectrum expansion ( $\delta$ , acetone- $d_6$ , 151 MHz) of flavone 4'-carboxylic acid (**5c**)

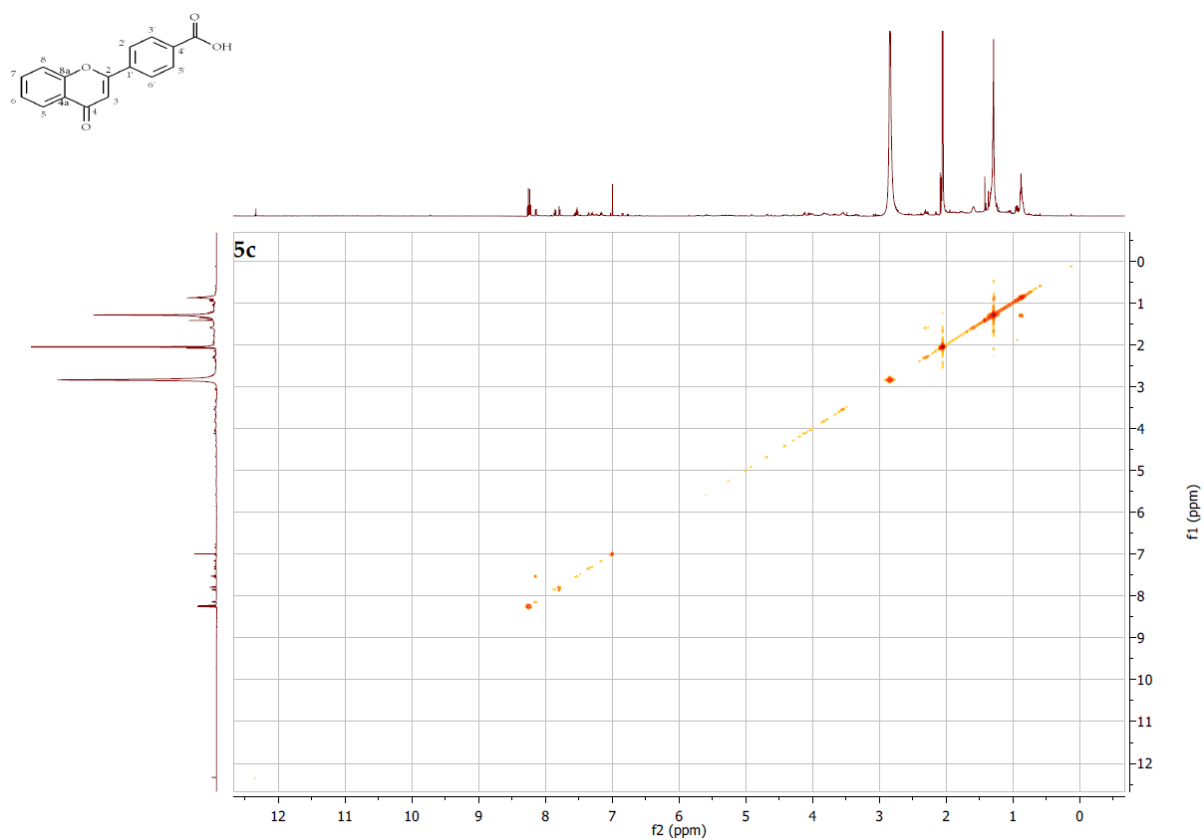

**Figure S157.** COSY contour map –  $^1\text{H} \times ^1\text{H}$  of flavone 4'-carboxylic acid (**5c**)

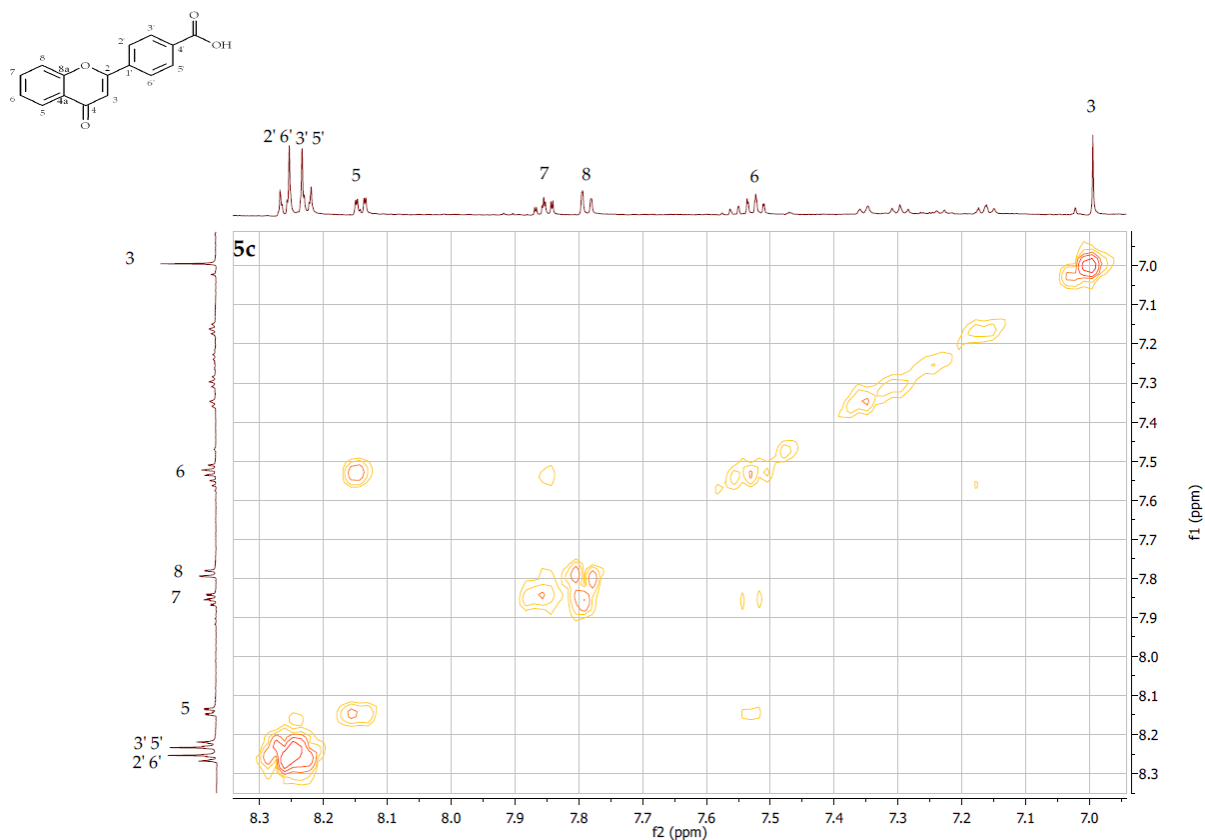

**Figure S158.** COSY contour map –  $^1\text{H} \times ^1\text{H}$  expansion of flavone 4'-carboxylic acid (5c)

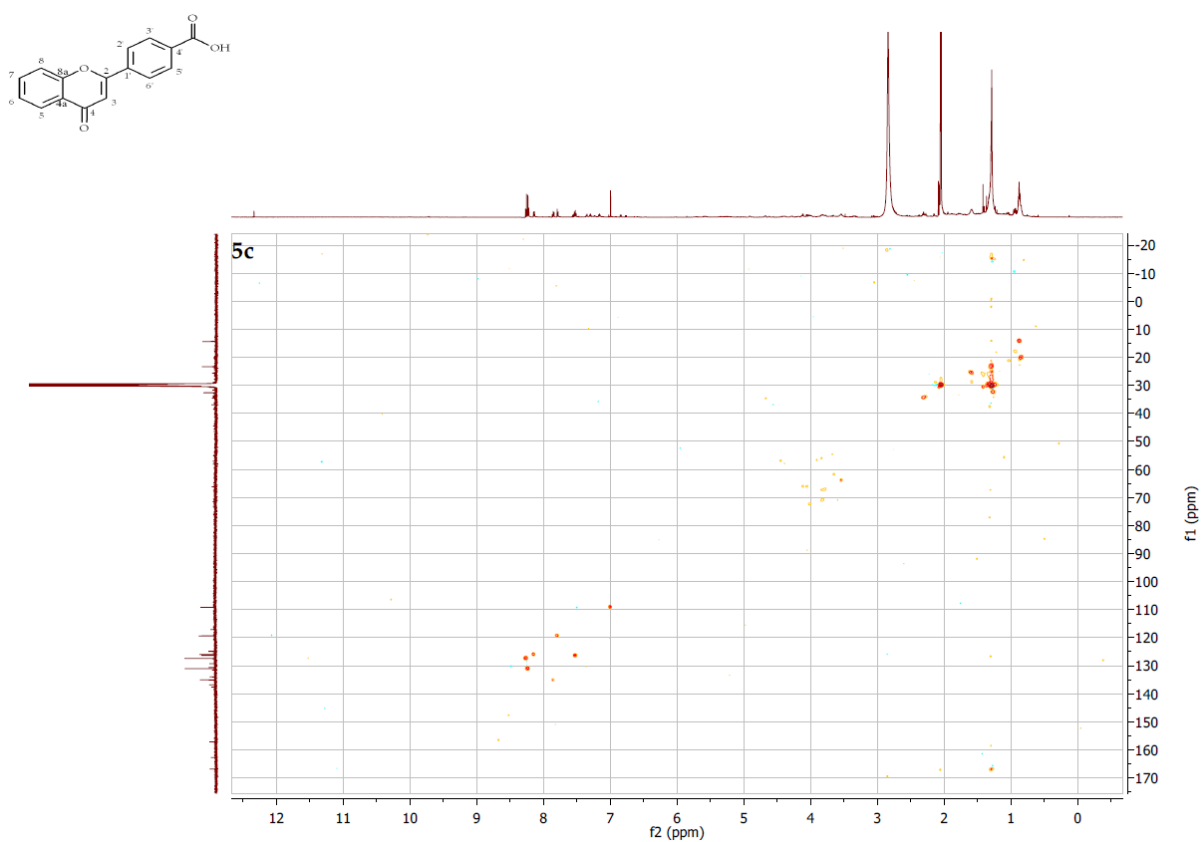

**Figure S159.** HSQC contour map –  $^1\text{H} \times ^{13}\text{C}$  of flavone 4'-carboxylic acid (5c)

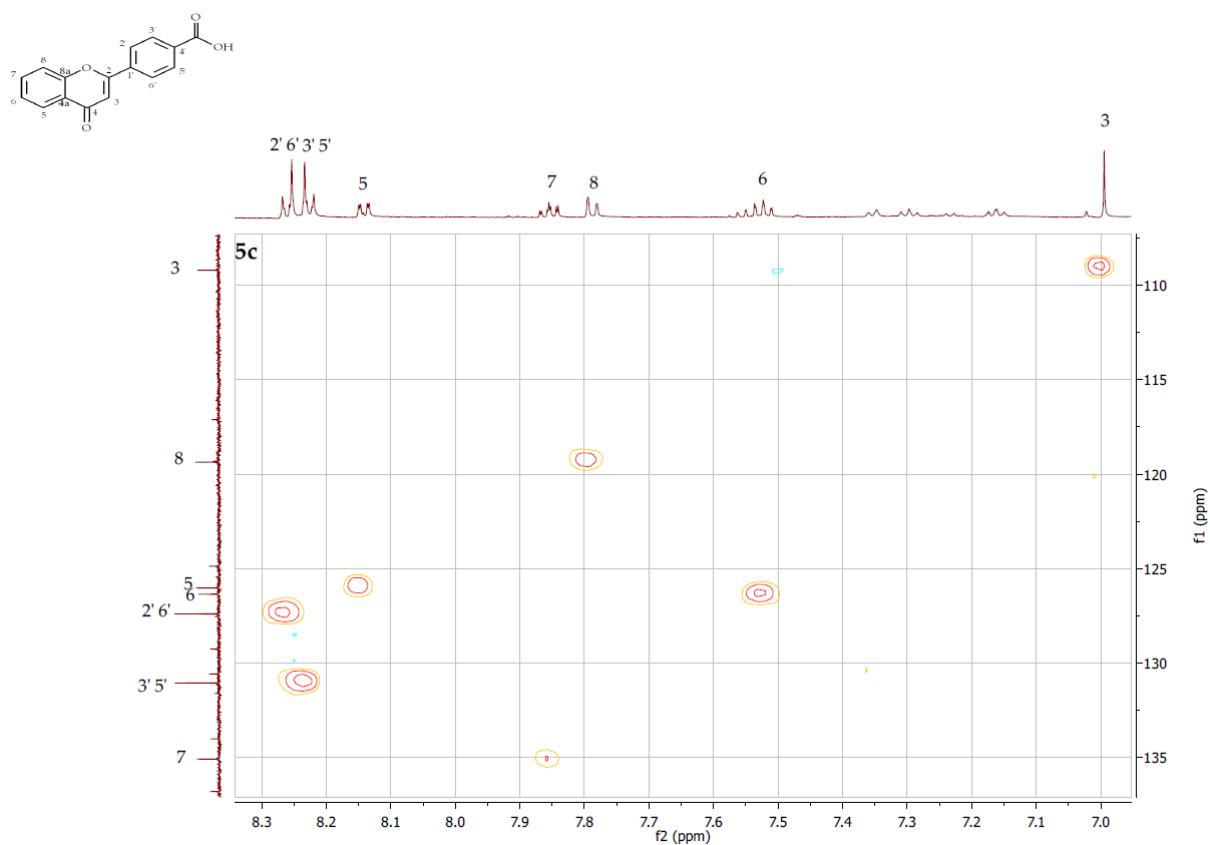

**Figure S160.** HSQC contour map –  $^1\text{H} \times ^{13}\text{C}$  expansion of flavone 4'-carboxylic acid (5c)

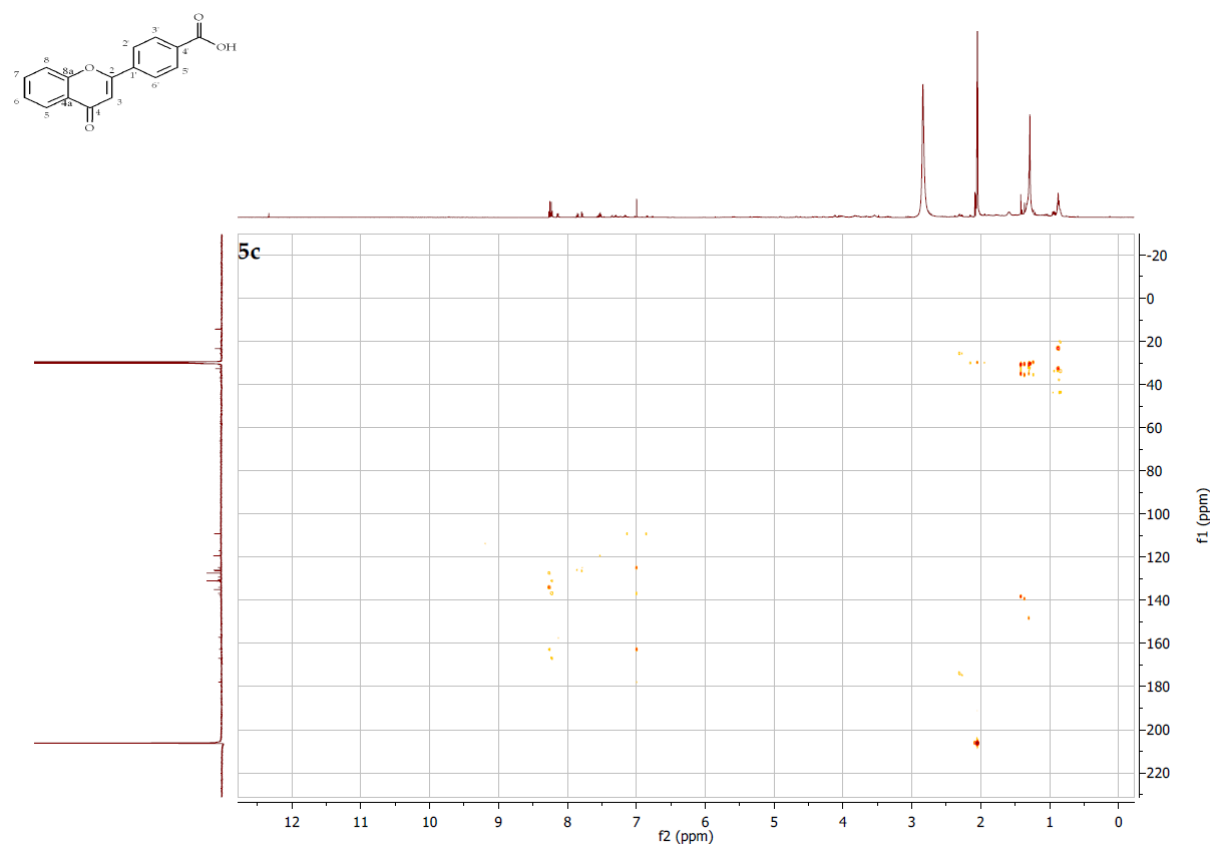

**Figure S161.** HMBC contour map –  $^1\text{H} \times ^{13}\text{C}$  of flavone 4'-carboxylic acid (5c)

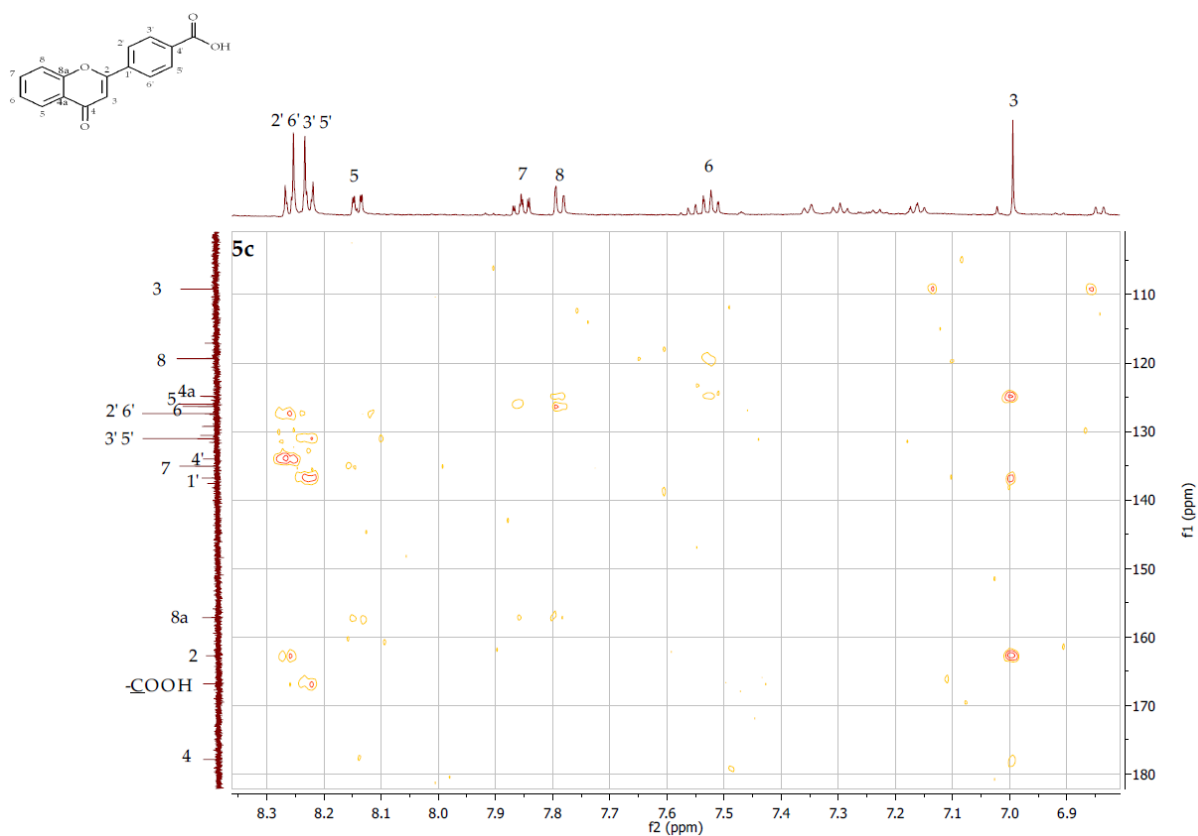

**Figure S162.** HMBC contour map –  $^1\text{H} \times ^{13}\text{C}$  expansion of flavone 4'-carboxylic acid (5c)

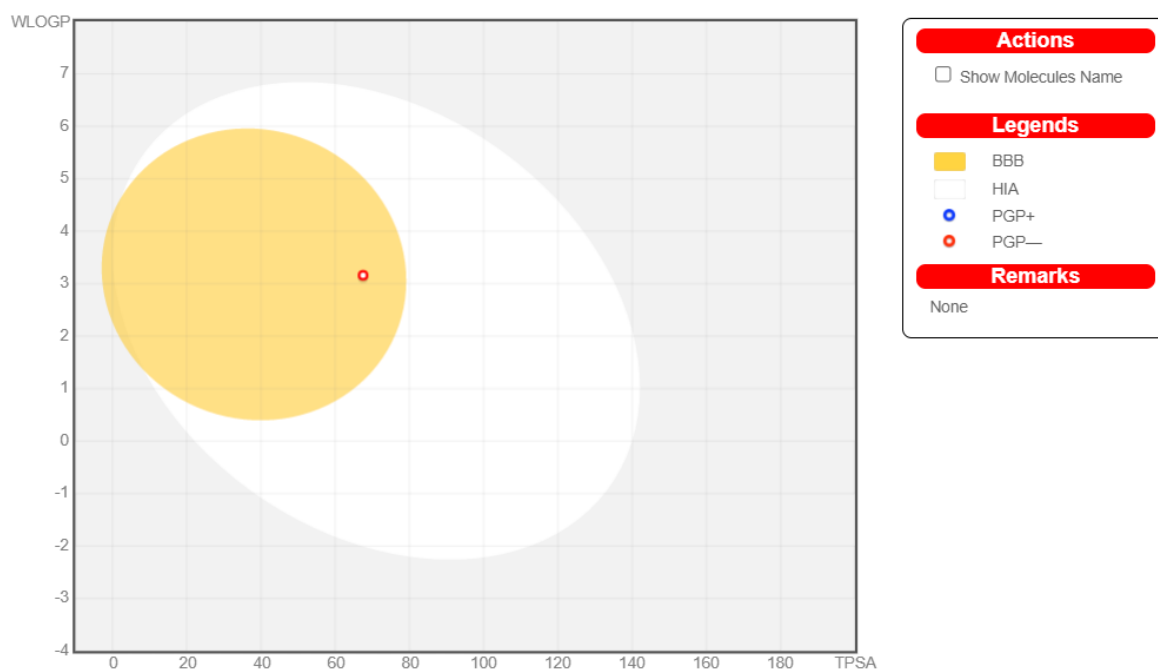

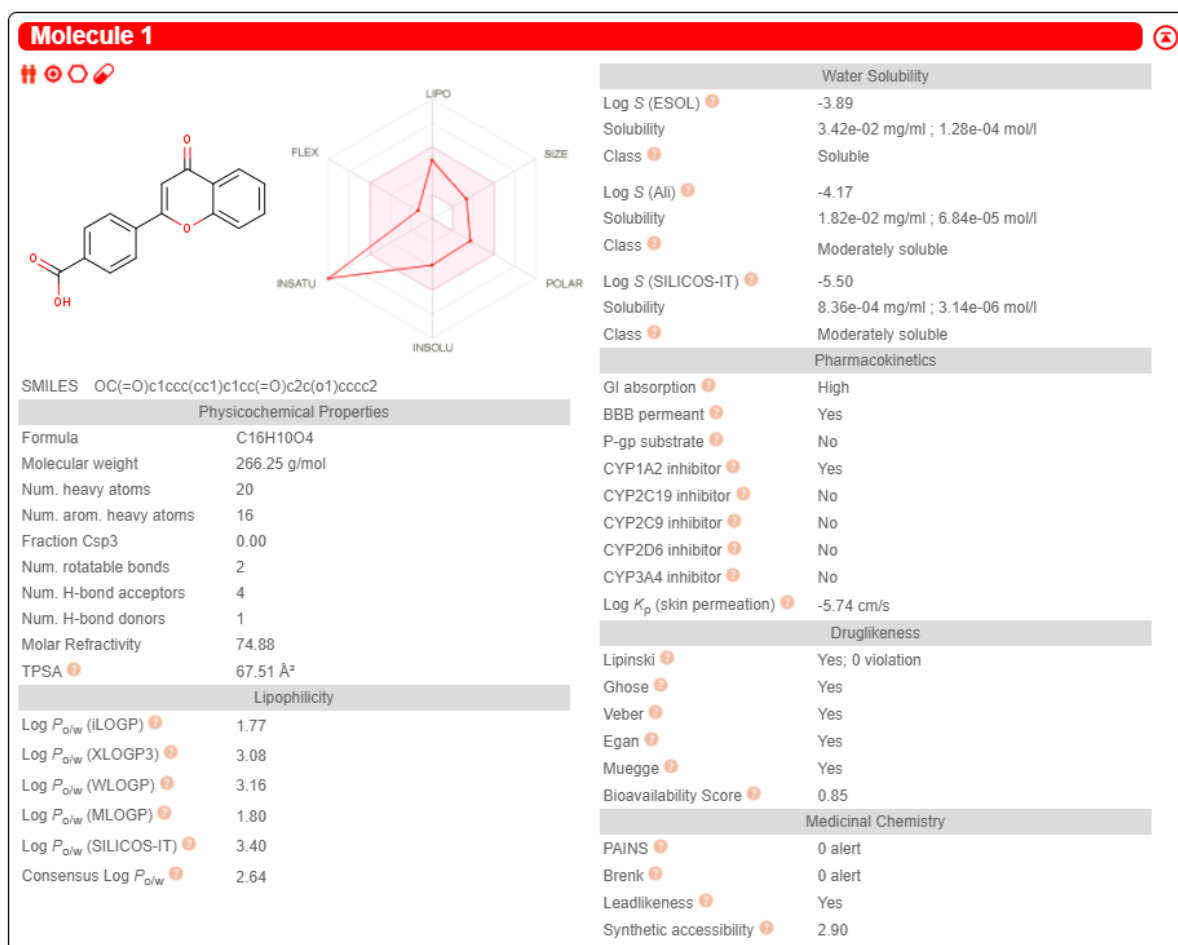

**Figure S163.** Flavone 4'-carboxylic acid (5c) physicochemical and ADME parameters prediction using the SwissADME modelling

| Pa    | Pi    | Activity                                              |
|-------|-------|-------------------------------------------------------|
| 0,972 | 0,001 | 4-Nitrophenol 2-monooxygenase inhibitor               |
| 0,959 | 0,002 | Chlordecone reductase inhibitor                       |
| 0,957 | 0,001 | Cholestanetriol 26-monooxygenase inhibitor            |
| 0,949 | 0,001 | Aryl-alcohol dehydrogenase (NADP+) inhibitor          |
| 0,932 | 0,002 | Alcohol dehydrogenase (NADP+) inhibitor               |
| 0,929 | 0,005 | Membrane integrity agonist                            |
| 0,923 | 0,002 | 2-Dehydropantoate 2-reductase inhibitor               |
| 0,919 | 0,005 | Methylenetetrahydrofolate reductase (NADPH) inhibitor |
| 0,916 | 0,003 | Membrane permeability inhibitor                       |

**Figure S164.** Flavone 4'-carboxylic acid (5c) biological activity prediction using the Way2Drug Pass online modelling

| Name                                 | Confidence | ChEMBL ID     |
|--------------------------------------|------------|---------------|
| Yersinia pestis                      | 0.5582     | CHEMBL614597  |
| RESISTANT Helicobacter pylori        | 0.4367     | CHEMBL612600  |
| Dialister pneumosintes               | 0.4087     | CHEMBL615039  |
| Dialister microaerophilus            | 0.4087     | CHEMBL615038  |
| Dialister propionificaciens          | 0.3798     | CHEMBL615040  |
| Pseudomonas fluorescens              | 0.3701     | CHEMBL612500  |
| RESISTANT Staphylococcus simulans    | 0.3328     | CHEMBL612425  |
| Parabacteroides merdae               | 0.3194     | CHEMBL615057  |
| Bacteroides uniformis                | 0.3156     | CHEMBL612622  |
| Salmonella enterica subsp. enterica  | 0.3008     | CHEMBL613044  |
| Streptococcus pneumoniae R6          | 0.2996     | CHEMBL2366794 |
| RESISTANT Burkholderia pseudomallei  | 0.2984     | CHEMBL3140323 |
| Shigella sp.                         | 0.2935     | CHEMBL614397  |
| Prevotella disiens                   | 0.2823     | CHEMBL612235  |
| RESISTANT Clostridium paraputrificum | 0.2786     | CHEMBL615027  |

**Figure S165.** Flavone 4'-carboxylic acid (**5c**) antibacterial activity prediction using the Way2Drug AntiBac-Pred modelling

| Name                     | Confidence | ChEMBL ID    |
|--------------------------|------------|--------------|
| Epidermophyton floccosum | 0.3059     | CHEMBL612386 |

**Figure S166.** Flavone 4'-carboxylic acid (**5c**) antifungal activity prediction using the Way2Drug AntiFun-Pred modelling

| Virus                                                                                                                               | Protein target                                | Confidence |
|-------------------------------------------------------------------------------------------------------------------------------------|-----------------------------------------------|------------|
| Human immunodeficiency virus 2                                                                                                      | Human immunodeficiency virus type 2 integrase | 0.8526     |
| Dengue virus type 2                                                                                                                 | Genome polyprotein                            | 0.6407     |
| Severe acute respiratory syndrome coronavirus 2                                                                                     | Replicase polyprotein 1ab                     | 0.5298     |
| Vaccinia virus (strain Western Reserve) (VACV) (Vaccinia virus (strainWR))                                                          | DNA polymerase                                | 0.3180     |
| SARS coronavirus                                                                                                                    | Replicase polyprotein 1ab                     | 0.1753     |
| SARS coronavirus                                                                                                                    | SARS coronavirus 3C-like proteinase           | 0.1053     |
| Infectious bronchitis virus                                                                                                         | 3C-like protease                              | 0.0937     |
| Varicella-zoster virus (strain Dumas) (HHV-3) (Human herpesvirus 3)                                                                 | DNA polymerase                                | 0.0914     |
| Herpes simplex virus (type 1 / strain 17)                                                                                           | Human herpesvirus 1 DNA polymerase            | 0.0914     |
| Middle East respiratory syndrome-related coronavirus (isolate UnitedKingdom/H123990006/2012) (Betacoronavirus England 1) (HCoV-EMC) | Replicase polyprotein 1ab                     | 0.0821     |

**Figure S167.** Flavone 4'-carboxylic acid (**5c**) antiviral activity prediction using the Way2Drug AntiVir-Pred modelling

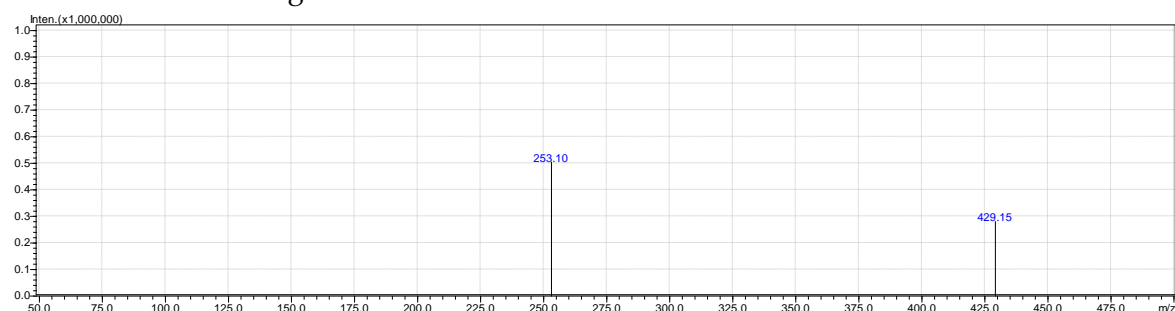

**Figure S168.** MS analysis 4'-methylflavone 3-O-β-D-(4''-O-methyl)-glucopyranoside (**5d**)

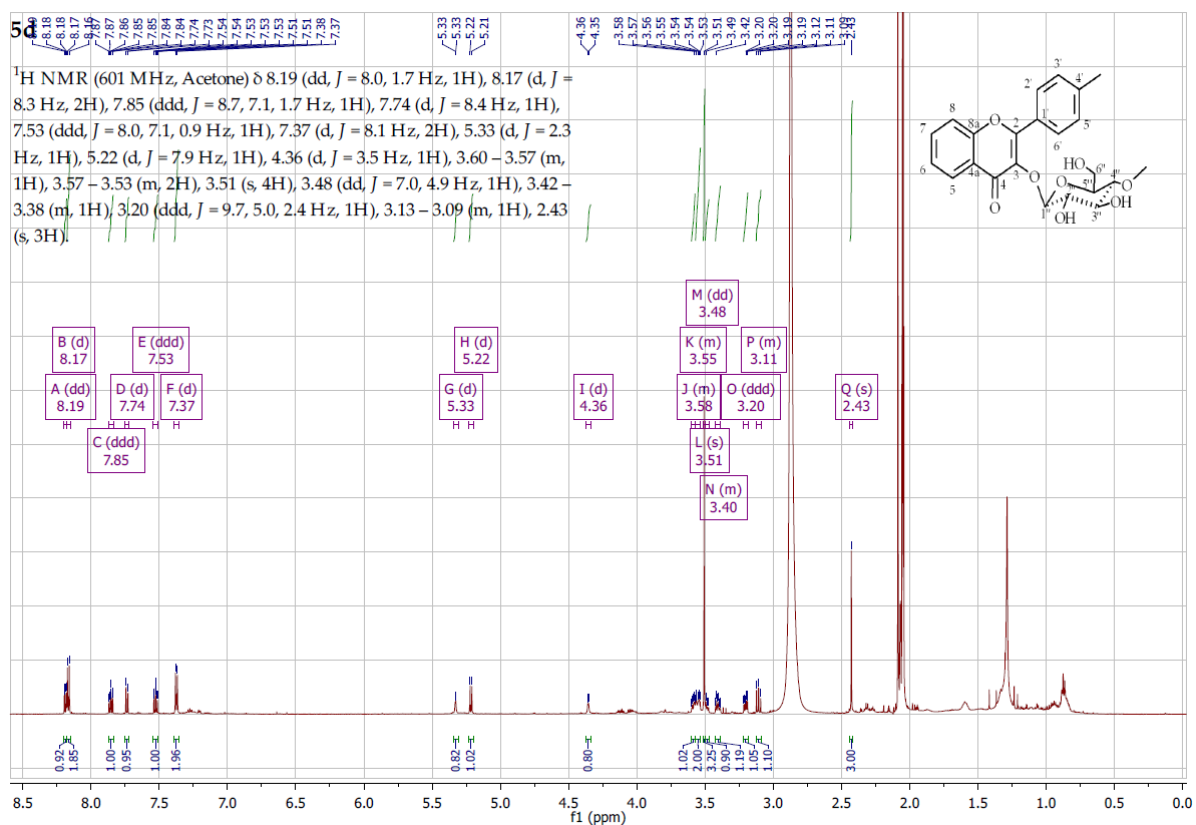

**Figure S169.** <sup>1</sup>H NMR spectrum (δ, acetone-d<sub>6</sub>, 600 MHz) of 4'-methylflavone 3-O-β-D-(4''-O-methyl)-glucopyranoside (**5d**)

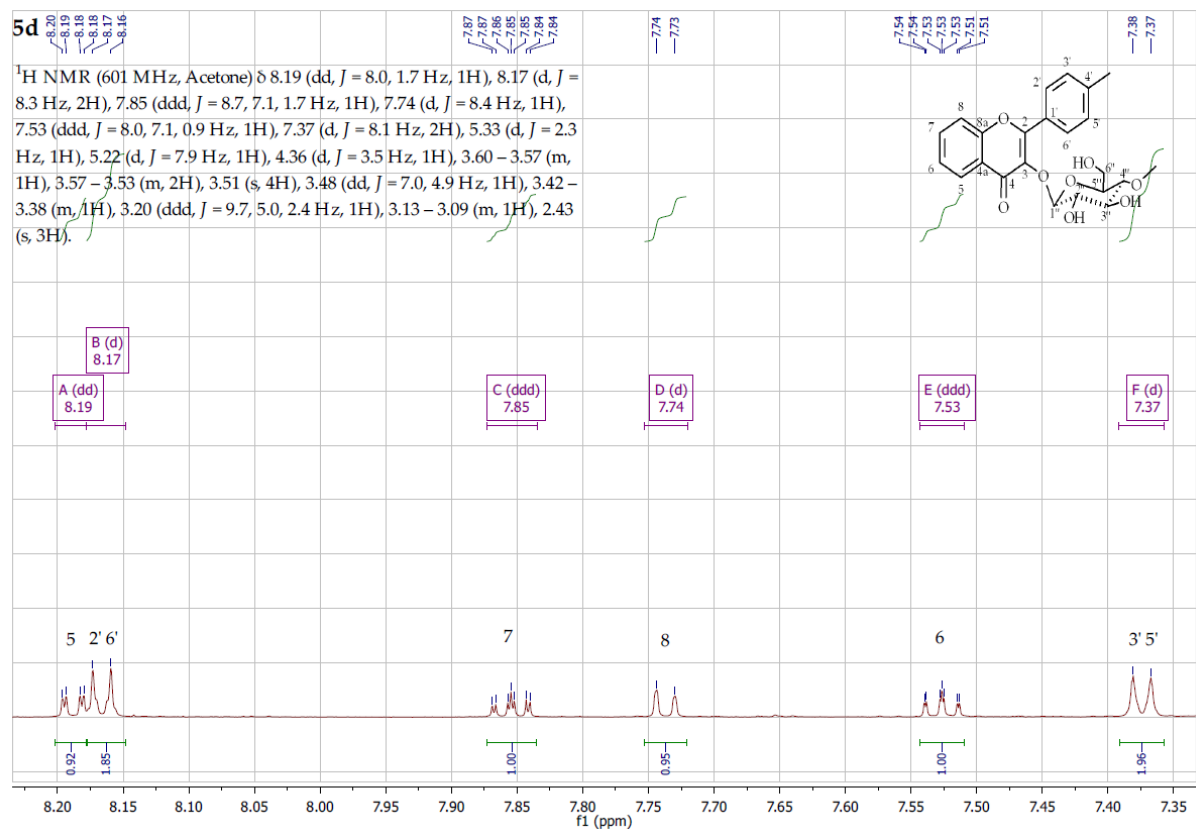

**Figure S170.** <sup>1</sup>H NMR spectrum expansion (δ, acetone-d<sub>6</sub>, 600 MHz) of 4'-methylflavone 3-O-β-D-(4''-O-methyl)-glucopyranoside (**5d**)

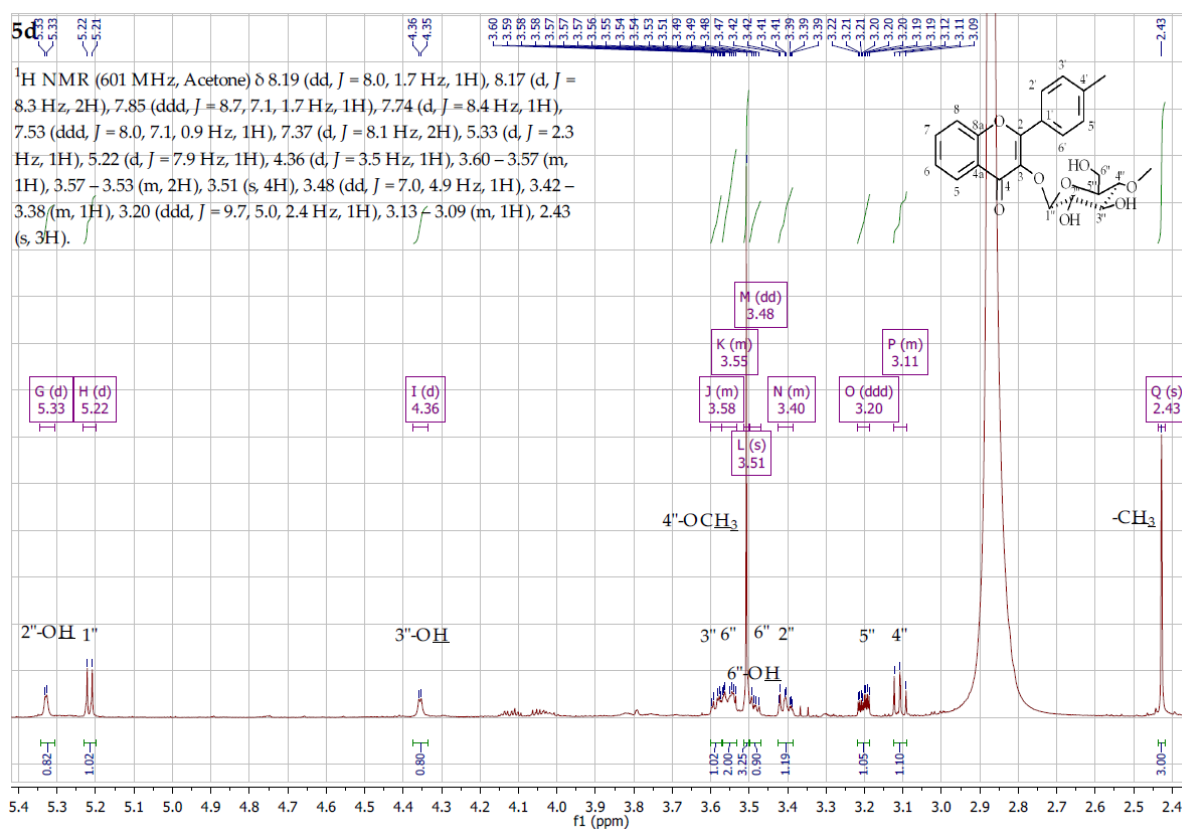

**Figure S171.** <sup>1</sup>H NMR spectrum expansion (δ, acetone-d<sub>6</sub>, 600 MHz) of 4'-methylflavone 3-O-β-D-(4''-O-methyl)-glucopyranoside (**5d**)

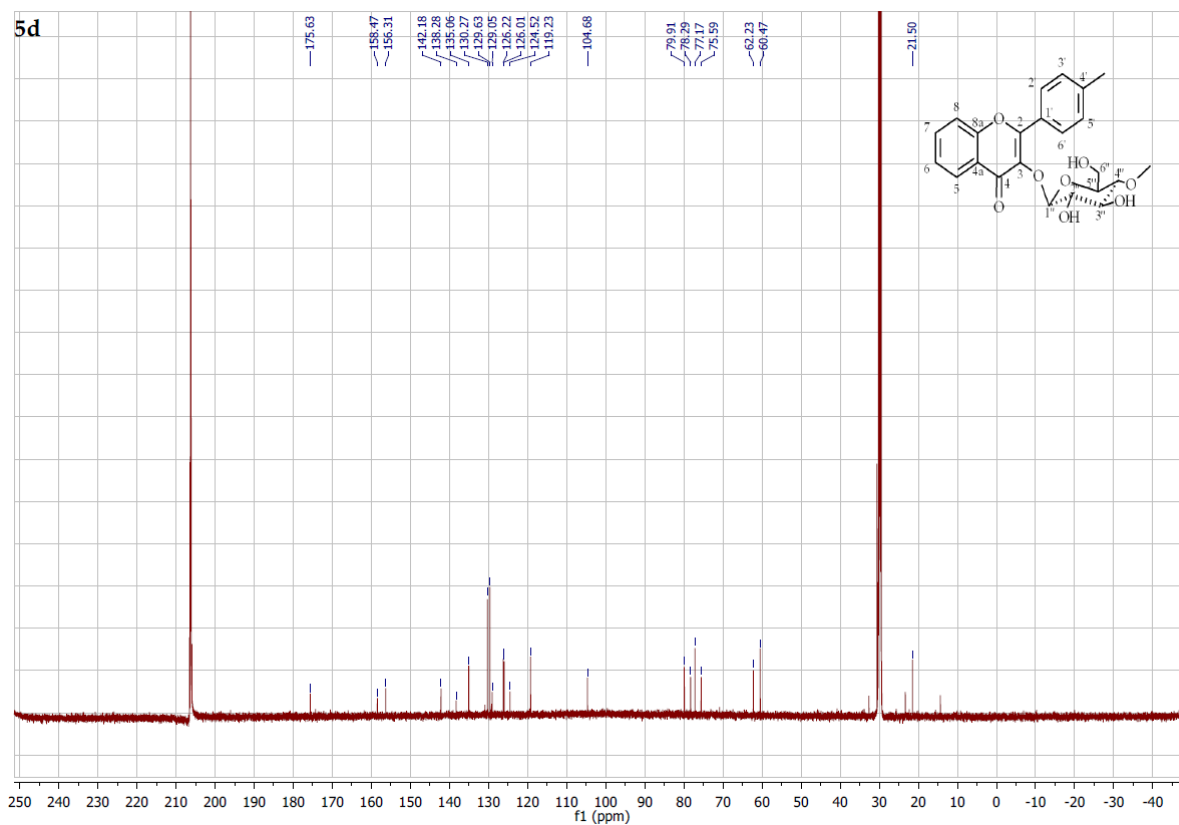

**Figure S172.** <sup>13</sup>C NMR spectrum expansion (δ, acetone-d<sub>6</sub>, 151 MHz) of 4'-methylflavone 3-O-β-D-(4''-O-methyl)-glucopyranoside (**5d**)



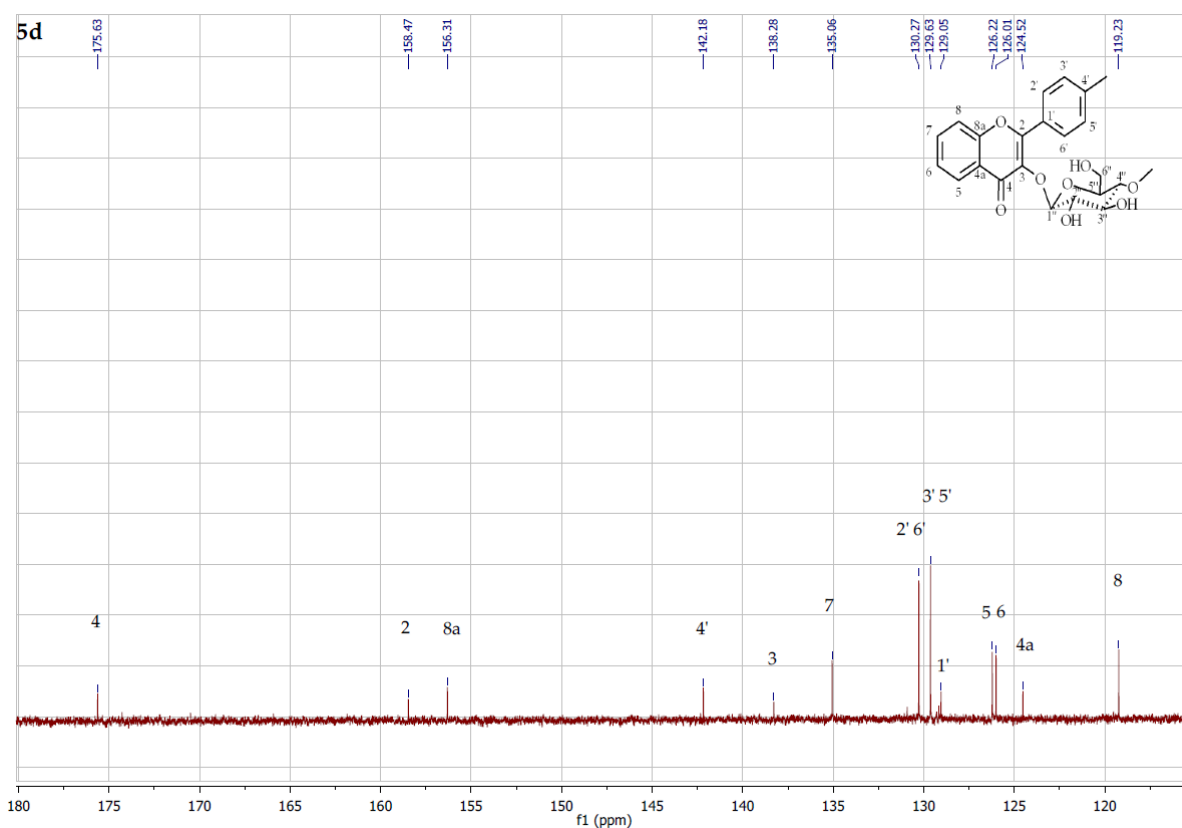

**Figure S173.**  $^{13}\text{C}$  NMR spectrum expansion ( $\delta$ , acetone- $\text{d}_6$ , 151 MHz) of 4'-methylflavone 3-O- $\beta$ -D-(4''-O-methyl)-glucopyranoside (**5d**)

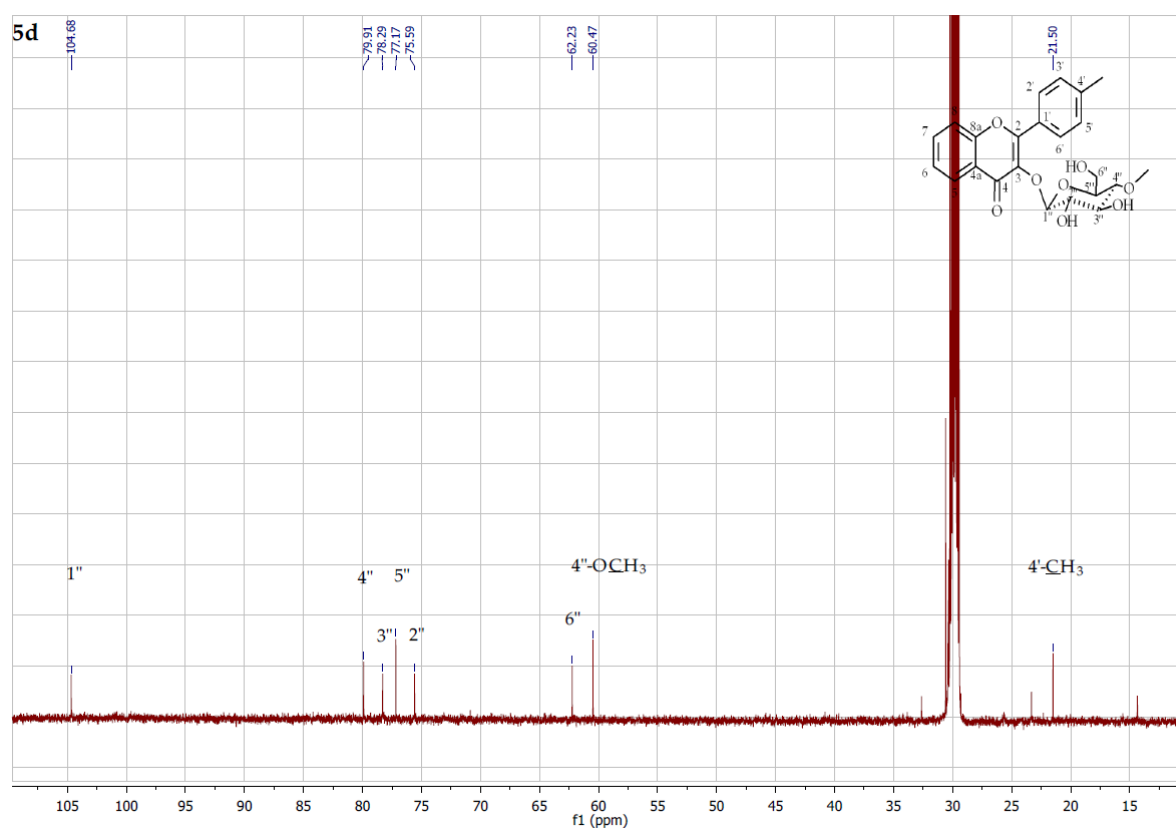

**Figure S174.**  $^{13}\text{C}$  NMR spectrum expansion ( $\delta$ , acetone- $\text{d}_6$ , 151 MHz) of 4'-methylflavone 3-O- $\beta$ -D-(4''-O-methyl)-glucopyranoside (**5d**)

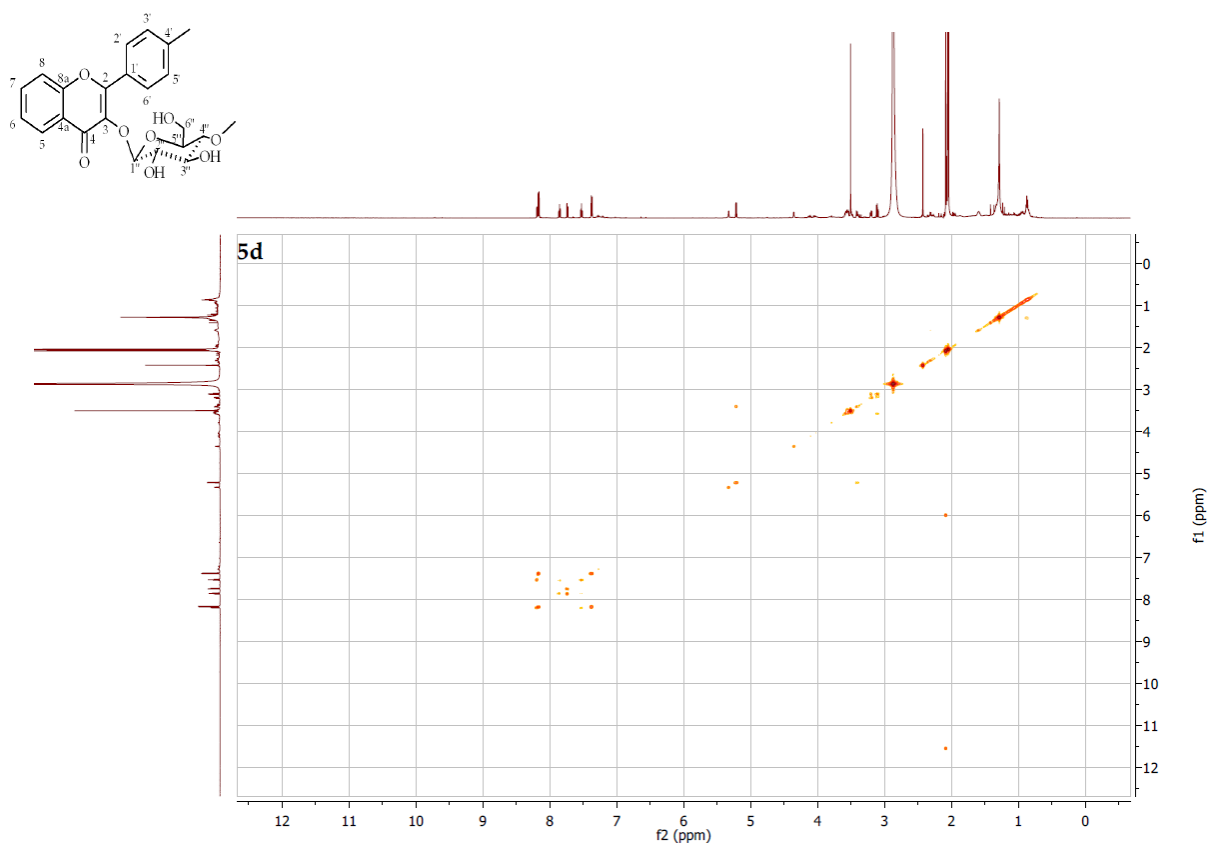

**Figure S175.** COSY contour map –  $^1\text{H} \times ^1\text{H}$  of 4'-methylflavone 3-O- $\beta$ -D-(4''-O-methyl)-glucopyranoside (**5d**)

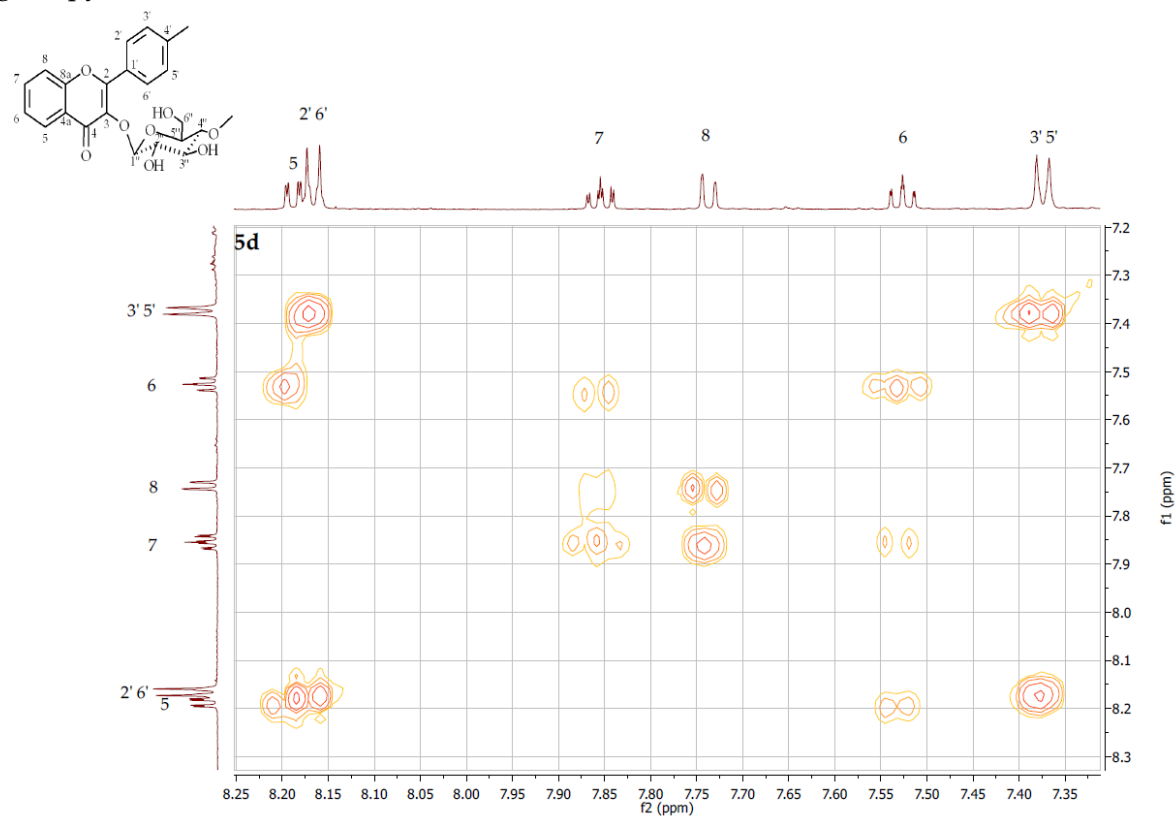

**Figure S176.** COSY contour map –  $^1\text{H} \times ^1\text{H}$  expansion of 4'-methylflavone 3-O- $\beta$ -D-(4''-O-methyl)-glucopyranoside (**5d**)

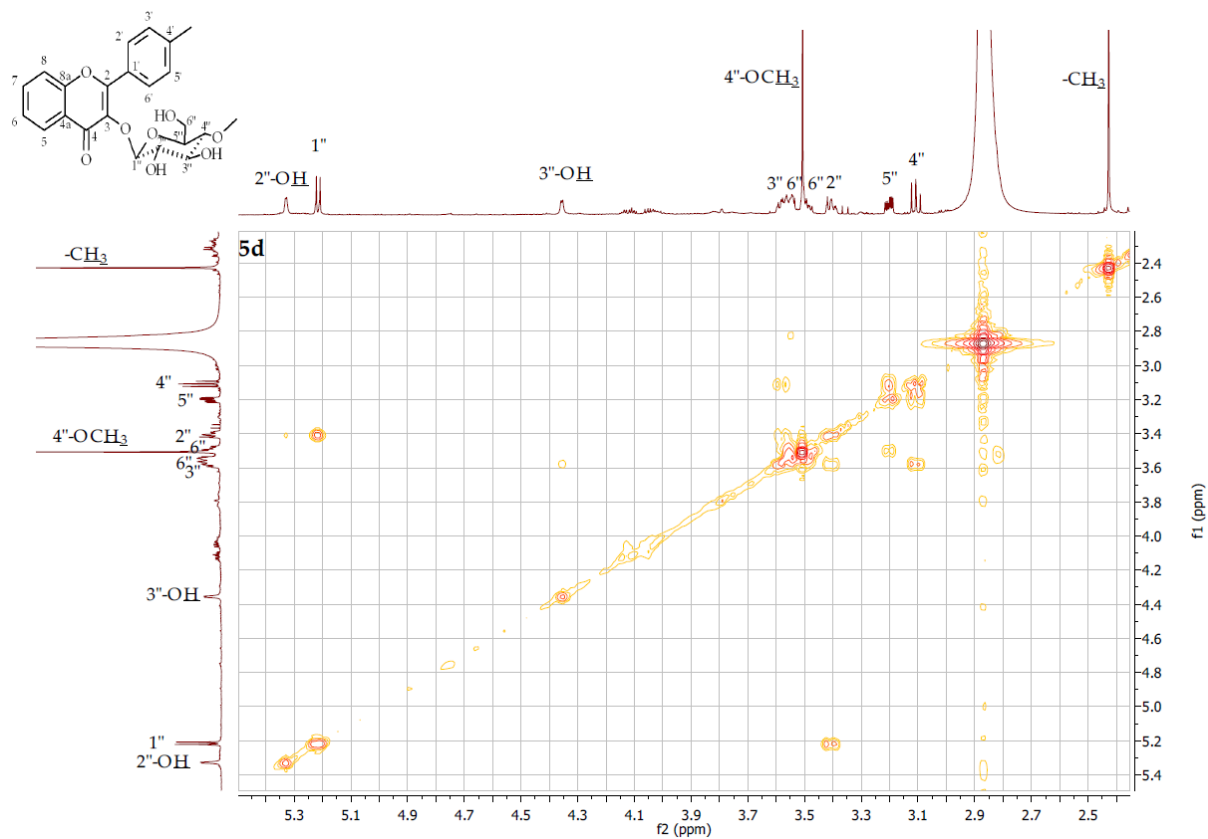

**Figure S177.** COSY contour map –  $^1\text{H} \times ^1\text{H}$  expansion of 4'-methylflavone 3-O- $\beta$ -D-(4''-O-methyl)-glucopyranoside (**5d**)

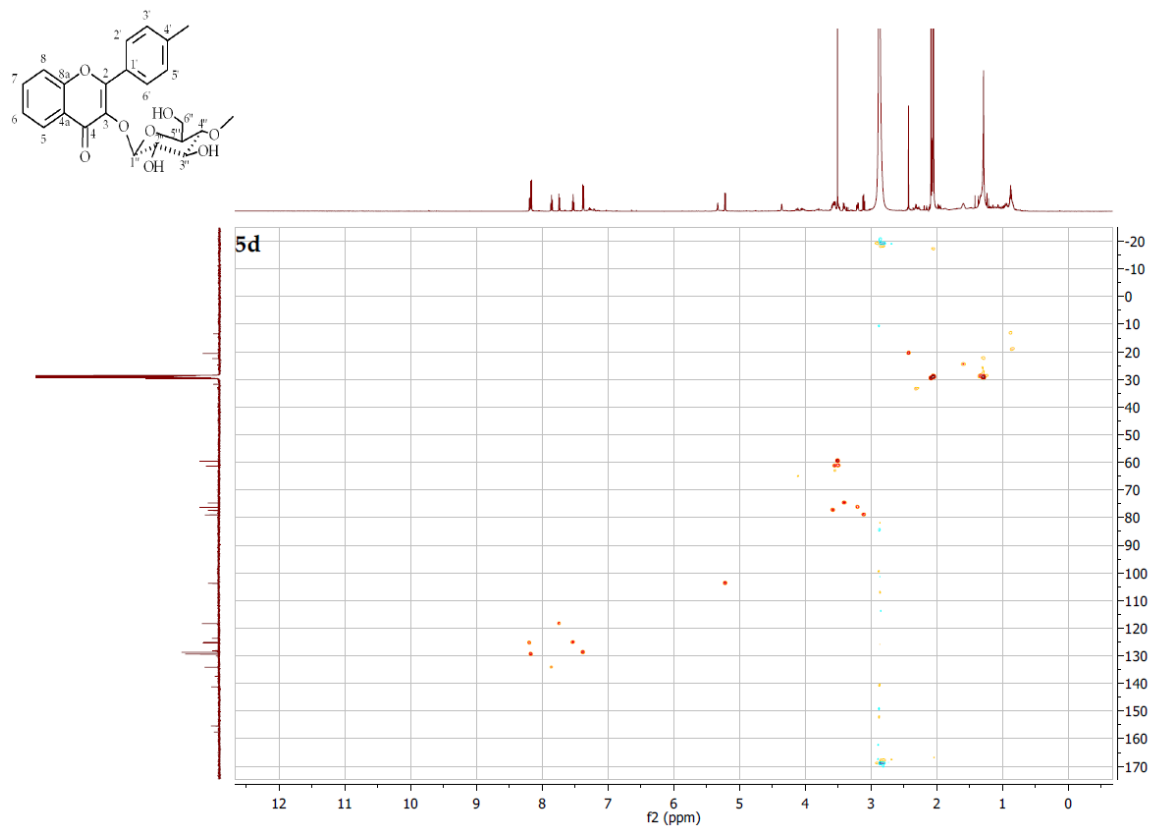

**Figure S178.** HSQC contour map –  $^1\text{H} \times ^{13}\text{C}$  of 4'-methylflavone 3-O- $\beta$ -D-(4''-O-methyl)-glucopyranoside (**5d**)

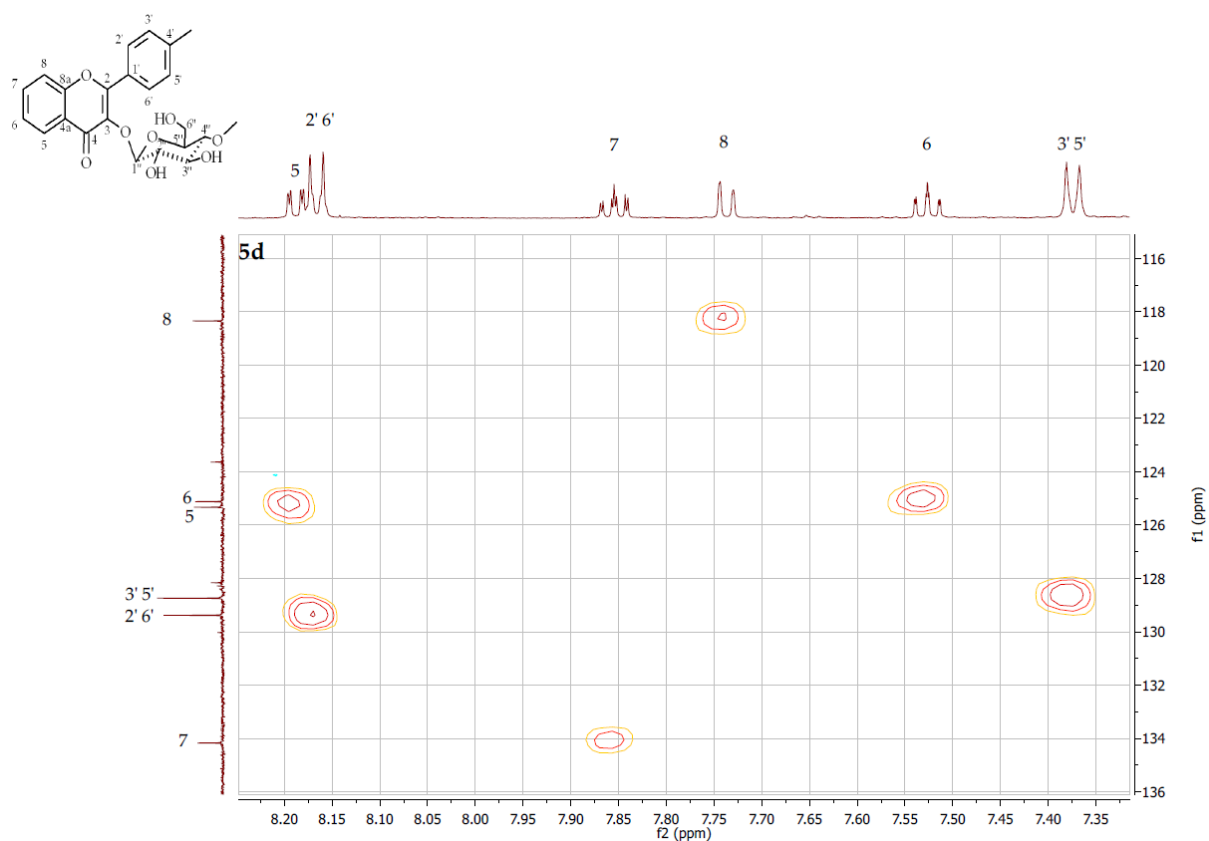

**Figure S179.** HSQC contour map – <sup>1</sup>H x <sup>13</sup>C expansion of 4'-methylflavone 3-O-β-D-(4''-O-methyl)-glucopyranoside (**5d**)

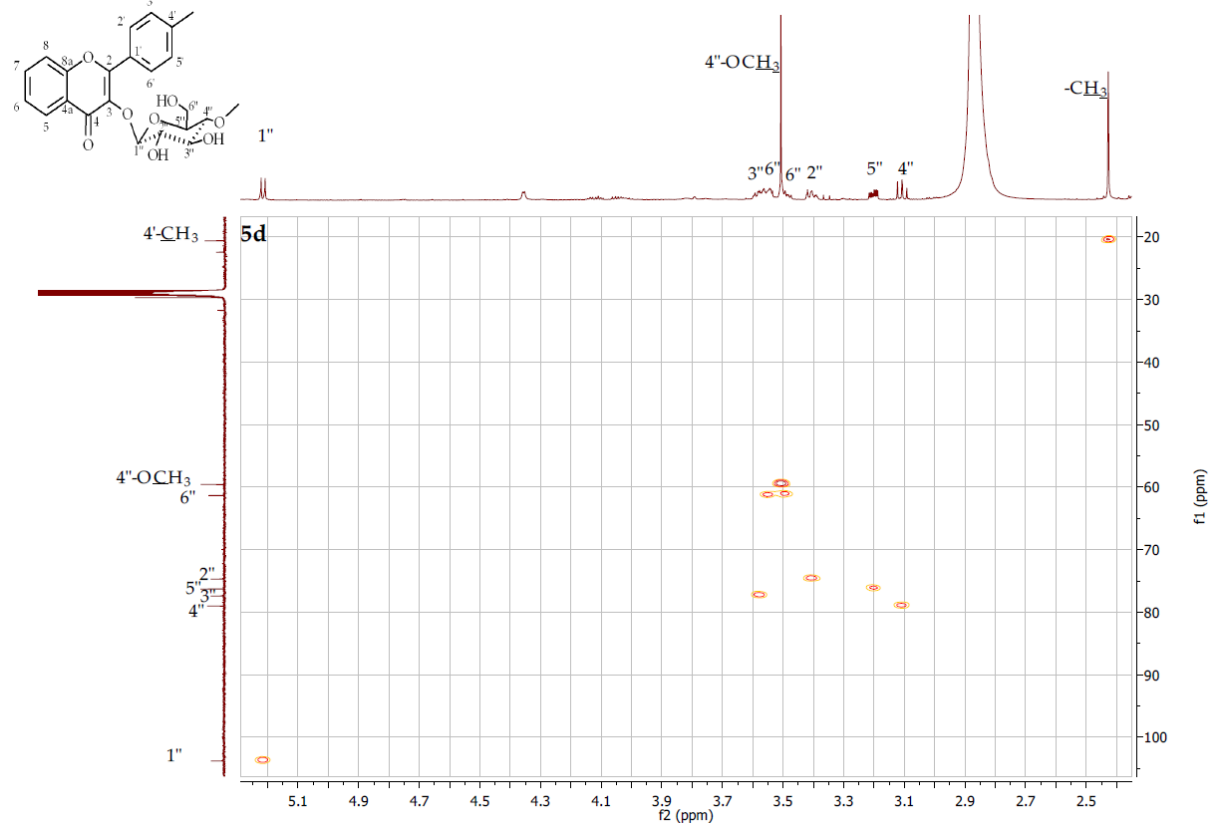

**Figure S180.** HSQC contour map – <sup>1</sup>H x <sup>13</sup>C expansion of 4'-methylflavone 3-O-β-D-(4''-O-methyl)-glucopyranoside (**5d**)

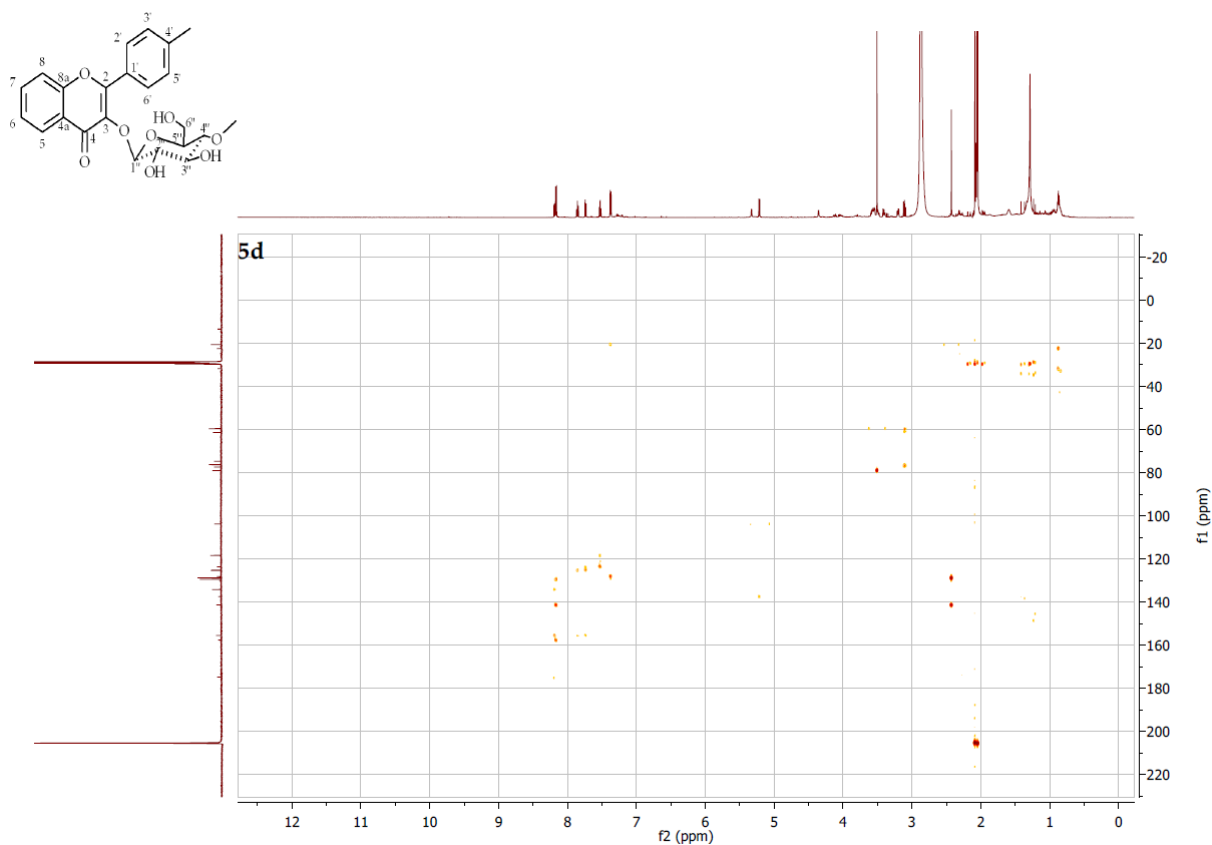

**Figure S181.** HMBC contour map –  $^1\text{H} \times ^{13}\text{C}$  of 4'-methylflavone 3-O- $\beta$ -D-(4''-O-methyl)-glucopyranoside (**5d**)

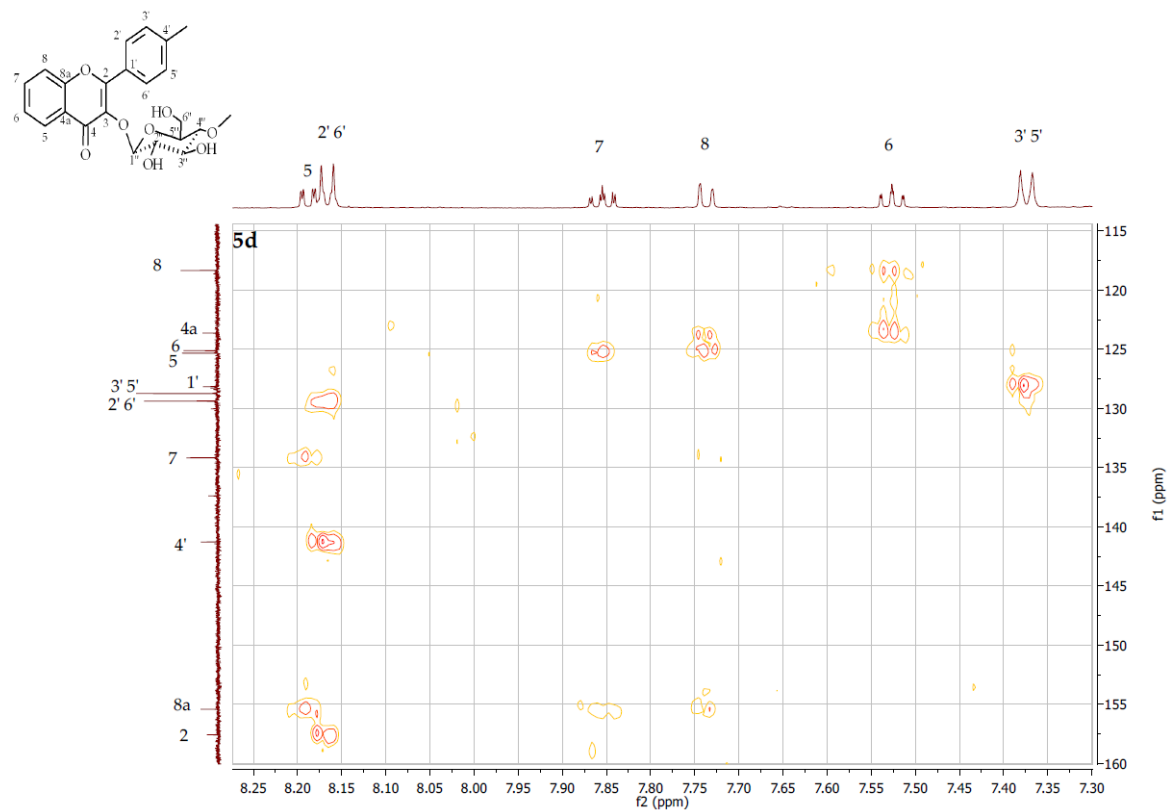

**Figure S182.** HMBC contour map –  $^1\text{H} \times ^{13}\text{C}$  expansion of 4'-methylflavone 3-O- $\beta$ -D-(4''-O-methyl)-glucopyranoside (**5d**)

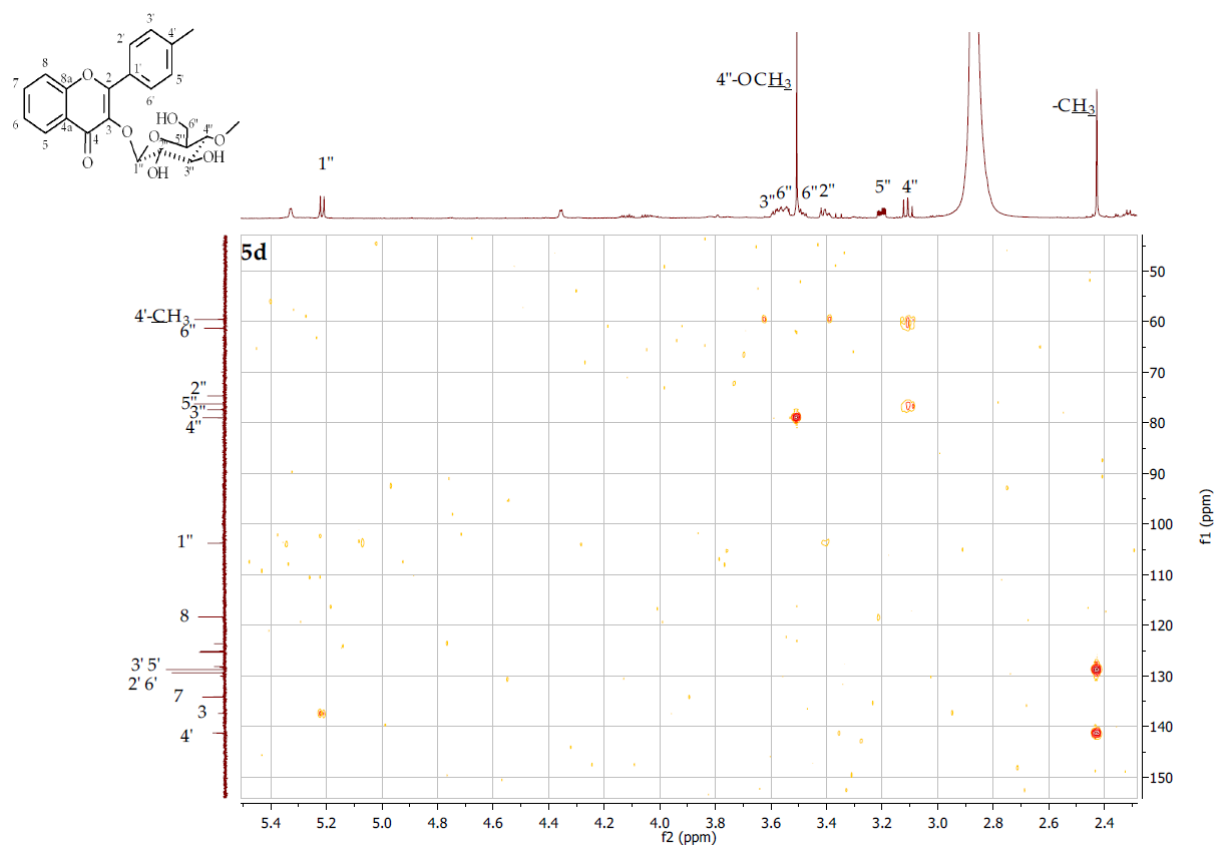

**Figure S183.** HMBC contour map –  $^1\text{H} \times ^{13}\text{C}$  expansion of 4'-methylflavone 3-O- $\beta$ -D-(4''-O-methyl)-glucopyranoside (**5d**)

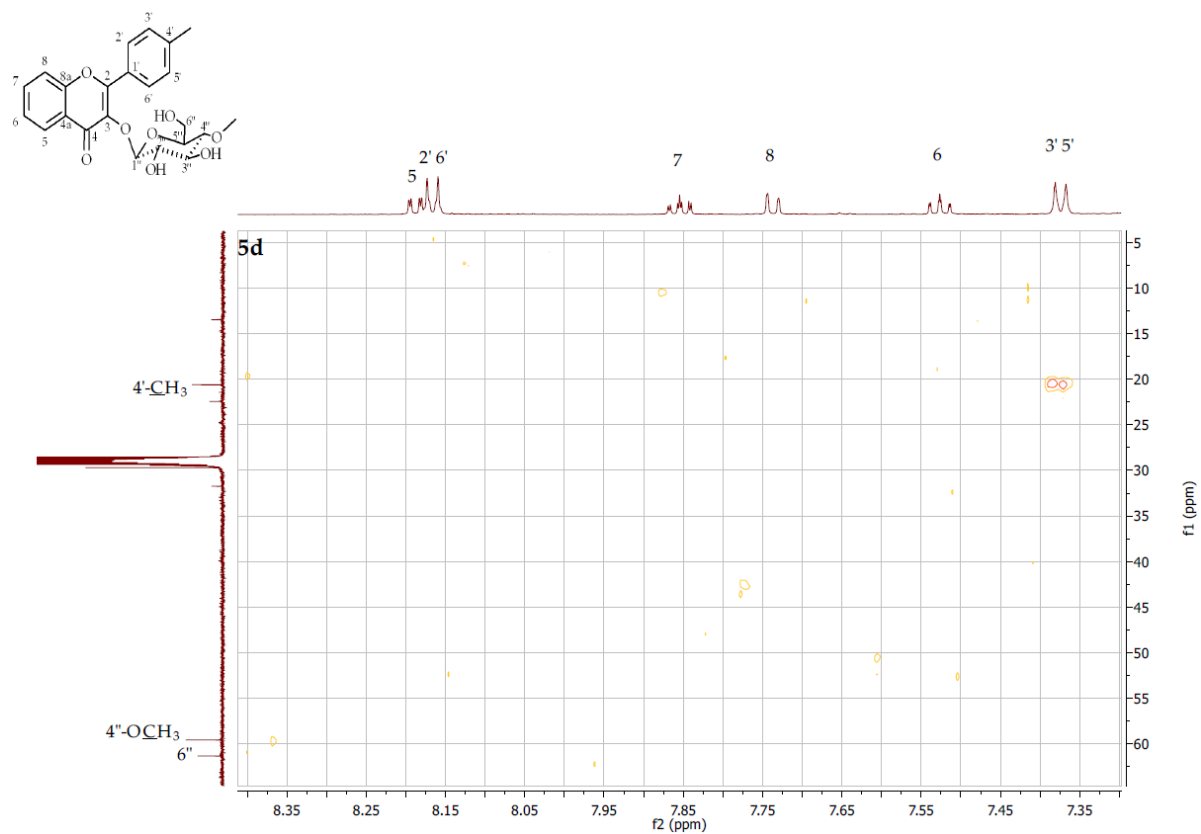

**Figure S184.** HMBC contour map –  $^1\text{H} \times ^{13}\text{C}$  expansion of 4'-methylflavone 3-O- $\beta$ -D-(4''-O-methyl)-glucopyranoside (**5d**)

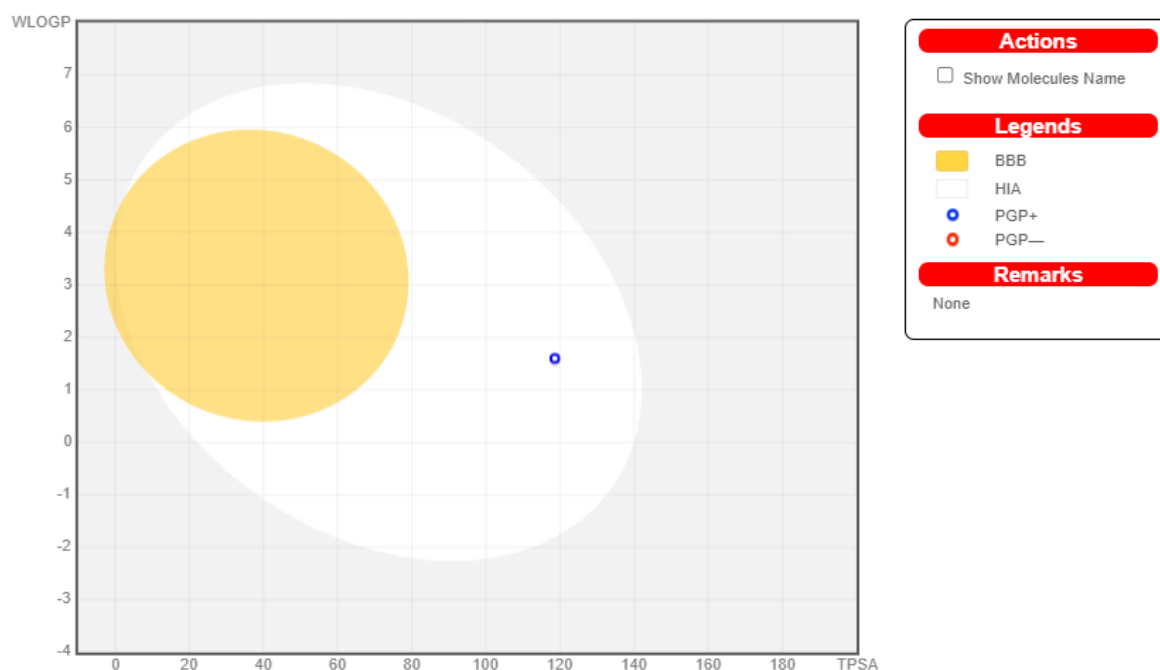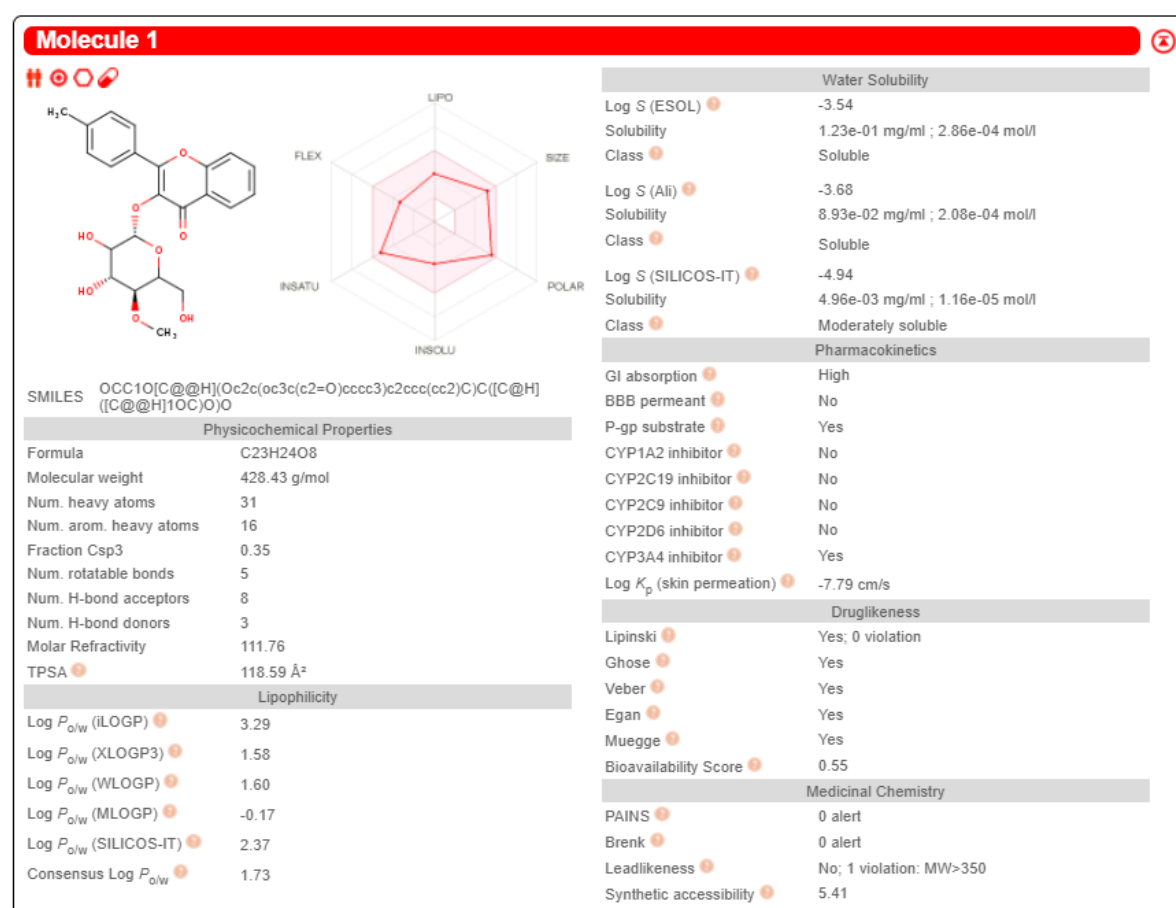

**Figure S185.** 4'-Methylflavone 3-O- $\beta$ -D-(4''-O-methyl)-glucopyranoside (**5d**) physicochemical and ADME parameters prediction using the SwissADME modelling

| Pa    | Pi    | Activity                                         |
|-------|-------|--------------------------------------------------|
| 0,971 | 0,002 | Membrane integrity agonist                       |
| 0,967 | 0,001 | Membrane permeability inhibitor                  |
| 0,939 | 0,002 | Cardioprotectant                                 |
| 0,937 | 0,005 | CDP-glycerol glycerophosphotransferase inhibitor |
| 0,914 | 0,003 | Vasoprotector                                    |
| 0,912 | 0,002 | Monophenol monooxygenase inhibitor               |
| 0,904 | 0,004 | Anaphylatoxin receptor antagonist                |
| 0,895 | 0,003 | Hepatoprotectant                                 |
| 0,889 | 0,003 | Anticarcinogenic                                 |
| 0,887 | 0,002 | Free radical scavenger                           |

**Figure S186.** 4'-Methylflavone 3-O- $\beta$ -D-(4''-O-methyl)-glucopyranoside (**5d**) biological activity prediction using the Way2Drug Pass online modelling

| Name                                                               | Confidence | ChEMBL ID                     |
|--------------------------------------------------------------------|------------|-------------------------------|
| <i>Clostridium ramosum</i>                                         | 0.6641     | <a href="#">CHEMBL614971</a>  |
| <i>Yersinia pestis</i>                                             | 0.6518     | <a href="#">CHEMBL614597</a>  |
| <i>Actinomyces meyeri</i>                                          | 0.6127     | <a href="#">CHEMBL612289</a>  |
| RESISTANT <i>Acinetobacter pittii</i>                              | 0.5964     | <a href="#">CHEMBL3140321</a> |
| RESISTANT <i>Mycobacterium ulcerans</i>                            | 0.5889     | <a href="#">CHEMBL612965</a>  |
| <i>Mycobacterium mageritense</i>                                   | 0.5780     | <a href="#">CHEMBL612959</a>  |
| <i>Clostridium cadaveris</i>                                       | 0.5715     | <a href="#">CHEMBL614970</a>  |
| RESISTANT <i>Staphylococcus aureus</i> subsp. <i>aureus</i> RN4220 | 0.4894     | <a href="#">CHEMBL2366906</a> |
| <i>Lactobacillus plantarum</i>                                     | 0.4445     | <a href="#">CHEMBL614973</a>  |
| <i>Staphylococcus lugdunensis</i>                                  | 0.4419     | <a href="#">CHEMBL613303</a>  |
| <i>Streptococcus pneumoniae</i> R6                                 | 0.4406     | <a href="#">CHEMBL2366794</a> |
| <i>Nocardia transvalensis</i>                                      | 0.4250     | <a href="#">CHEMBL613234</a>  |
| <i>Streptococcus oralis</i>                                        | 0.4241     | <a href="#">CHEMBL613305</a>  |
| <i>Clostridium sordellii</i>                                       | 0.4177     | <a href="#">CHEMBL613072</a>  |
| <i>Fusobacterium</i> sp.                                           | 0.3864     | <a href="#">CHEMBL612690</a>  |

**Figure S187.** 4'-Methylflavone 3-O- $\beta$ -D-(4''-O-methyl)-glucopyranoside (**5d**) antibacterial activity prediction using the Way2Drug AntiBac-Pred modelling



| Name                        | Confidence | CHEMBL ID                    |
|-----------------------------|------------|------------------------------|
| Rhizopus oryzae             | 0.4609     | <a href="#">CHEMBL612306</a> |
| Absidia corymbifera         | 0.4043     | <a href="#">CHEMBL612369</a> |
| Trichophyton mentagrophytes | 0.2885     | <a href="#">CHEMBL613162</a> |
| Candida dubliniensis        | 0.2241     | <a href="#">CHEMBL613334</a> |
| Aspergillus niger           | 0.1790     | <a href="#">CHEMBL358</a>    |
| Mucor                       | 0.1328     | <a href="#">CHEMBL612521</a> |
| Epidermophyton floccosum    | 0.1019     | <a href="#">CHEMBL612386</a> |
| Penicillium marneffei       | 0.0950     | <a href="#">CHEMBL612994</a> |
| Saccharomyces cerevisiae    | 0.0845     | <a href="#">CHEMBL361</a>    |
| Galactomyces geotrichum     | 0.0495     | <a href="#">CHEMBL613775</a> |
| Mucor hiemalis              | 0.0354     | <a href="#">CHEMBL612949</a> |
| Candida rugosa              | 0.0279     | <a href="#">CHEMBL612869</a> |

**Figure S188.** 4'-Methylflavone 3-O- $\beta$ -D-(4''-O-methyl)-glucopyranoside (**5d**) antifungal activity prediction using the Way2Drug AntiFun-Pred modelling

| Virus                                                               | Protein target                                | Confidence |
|---------------------------------------------------------------------|-----------------------------------------------|------------|
| Severe acute respiratory syndrome coronavirus 2                     | Replicase polyprotein 1ab                     | 0.9419     |
| Human immunodeficiency virus 2                                      | Human immunodeficiency virus type 2 integrase | 0.3592     |
| Varicella-zoster virus (strain Dumas) (HHV-3) (Human herpesvirus 3) | Thymidine kinase                              | 0.0130     |

**Figure S189.** 4'-Methylflavone 3-O- $\beta$ -D-(4''-O-methyl)-glucopyranoside (**5d**) antiviral activity prediction using the Way2Drug AntiVir-Pred modelling
